# Supplementary material for: Novel N(SCF 3 )(CF 3 )-amines: synthesis, scalability and stability
Source: Royal Society of Chemistry journal article supplement (doi:10.1039/d2sc06542h), 2023-01-01
Supplement: d2sc06542h1.pdf [file d2sc06542h1.pdf]

## Contents

|                                                                                          |     |
|------------------------------------------------------------------------------------------|-----|
| General information .....                                                                | 2   |
| General procedure for the synthesis of isothiocyanates .....                             | 3   |
| General information of Stability studies .....                                           | 5   |
| Optimization of the Reaction Conditions (Method with H-tube).....                        | 6   |
| Optimization of the Solvents (Method H-tube).....                                        | 7   |
| Mechanism Investigation .....                                                            | 8   |
| Characterization of starting materials .....                                             | 9   |
| General procedure for the synthesis of N, S-bis(trifluoromethyl) thiohydroxylamine ..... | 46  |
| Characterization of N, S-bis(trifluoromethyl)thiohydroxylamine.....                      | 48  |
| Crystallographic data collection and structure determination:.....                       | 139 |
| reference.....                                                                           | 141 |

## General information

Commercial reagents were used as supplied. Anhydrous solvents were used as supplied. NMR Spectra were recorded on a Bruker AV 400 spectrometer at 400 MHz ( $^1\text{H}$  NMR), 101 MHz ( $^{13}\text{C}$  NMR), 376 MHz ( $^{19}\text{F}$  NMR) or on a Bruker AV 300 spectrometer at 300 MHz ( $^1\text{H}$  NMR), 282 MHz ( $^{19}\text{F}$  NMR). Multiplicities are indicated as follows: s (singlet), d (doublet), t (triplet), q (quartet), p (quintet), sext (sextet), m (multiplet), b (broad). All coupling constants were reported in Hz. HR-MS measurements were performed on a Bruker MicrOTOFQ II (ESI) and an Agilent 7200 GC/Q-TOF (EI) mass spectrometers.

## General procedure for the synthesis of isothiocyanates

Prepared starting materials (R-NCS): compounds **1a**, **1c**, **1i**, **1j**, **1k**, **1n**, **1p**, **1s**, **1t**, **1u**, **1v**, **1w**, **1y**, **1z**, **1aa**, **1ae** are commercially available and were used without further purification.

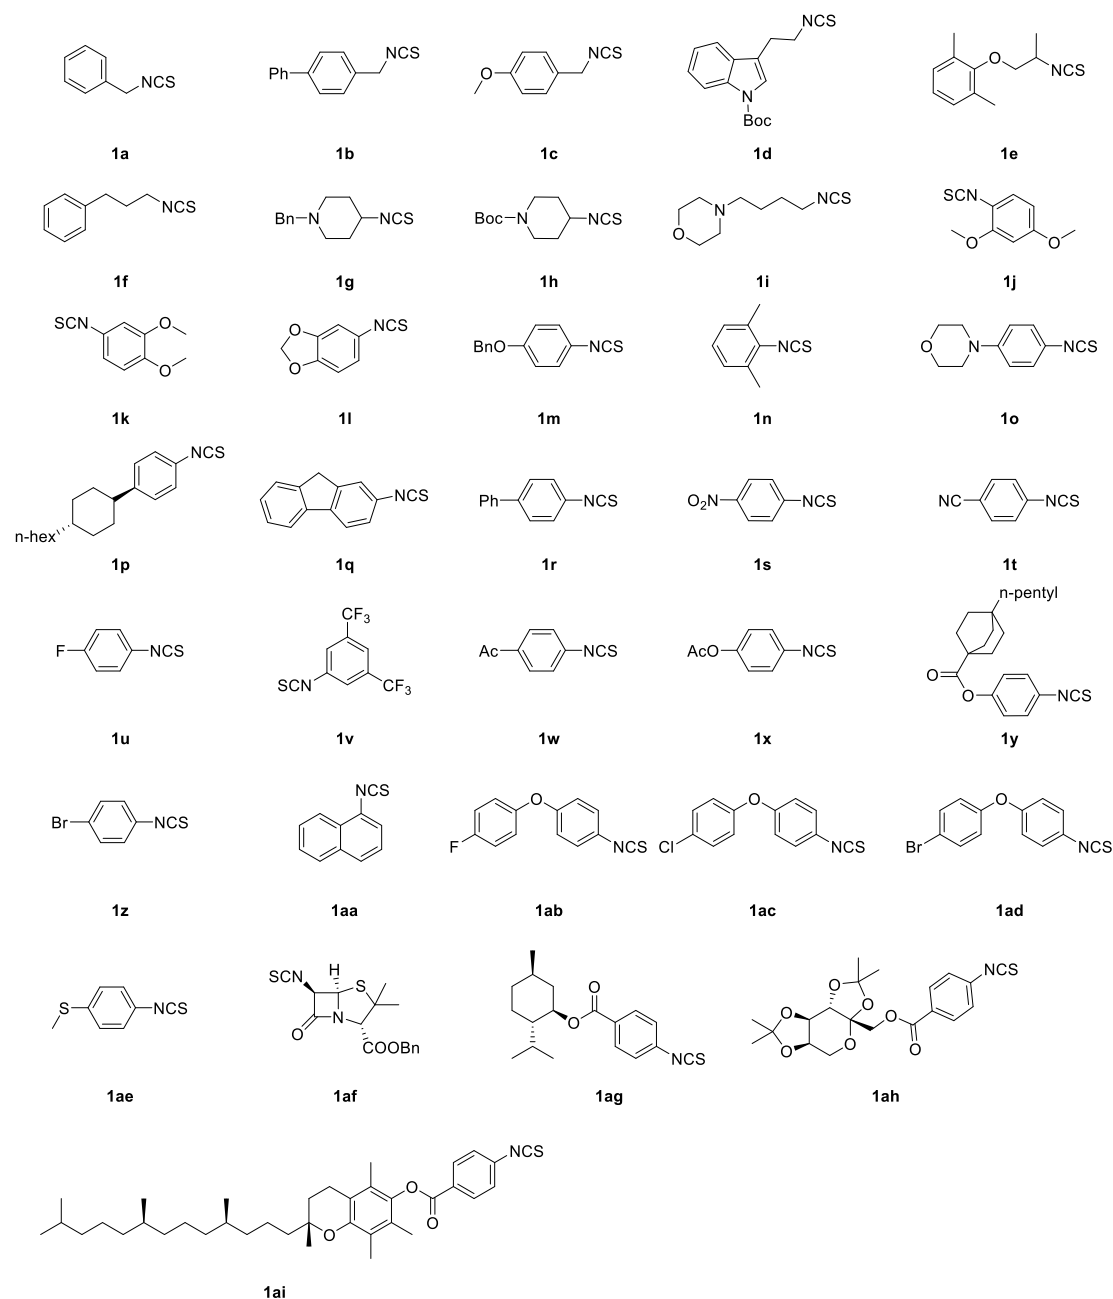

**General procedure A for the synthesis of isothiocyanates** (adapted from reported literature procedure<sup>1</sup>):

To a 25 mL flask were sequentially added primary amine or ammonium salt (5.0 mmol, 1.0 equiv.), water (5 mL), CS<sub>2</sub> (0.9 mL, 12.5 mmol, 2.5 equiv.), and potassium carbonate (1.38 g, 10.0 mmol, 2.0 equiv.). The mixture was stirred at room temperature overnight, followed by the addition of sodium persulfate (1.19 g, 5.0 mmol, 1.0 equiv.), potassium carbonate (690 mg, 5.0 mmol, 1.0 equiv.), and water (5.0 mL). The mixture was stirred at room temperature for 1 h. After completion,

brine was added (2.0 mL) and the mixture was extracted with ethyl acetate (3×30 mL). The combined organic layers were dried over anhydrous sodium sulfate and concentrated under reduced pressure. The crude material obtained was then purified by column chromatography on silica gel.

**General procedure B for the synthesis of isothiocyanates** (adapted from reported literature procedure<sup>2</sup>):

A 100 mL round-bottom flask was charged with the amine or ammonium salt (5.0 mmol, 1.0 equiv.), CH<sub>2</sub>Cl<sub>2</sub> (25 mL) and saturated aqueous NaHCO<sub>3</sub> (25 mL). To the biphasic system under strong stirring was slowly added thiophosgene (460 μL, 6.0 mmol, 1.2 equiv.) at room temperature. After 1 h, the two phases were separated, and the aqueous phase was extracted with CH<sub>2</sub>Cl<sub>2</sub> (3×30 mL). The combined organic layers were dried over anhydrous sodium sulfate and concentrated under reduced pressure. The crude material obtained was then purified by column chromatography on silica gel.

**General procedure C for the synthesis of isothiocyanates** (adapted from reported literature procedure<sup>2</sup>):

A 50 mL round-bottom flask was charged with the amine (5.0 mmol, 1.0 equiv.) and CH<sub>2</sub>Cl<sub>2</sub> (15 mL). To the reaction mixture was added in one portion 1,1'-thiocarbonyldiimidazole (1.07 g, 6.0 mmol, 1.2 equiv.) at room temperature. After 1 h, water was added, and the two layers were separated. The aqueous layer was extracted with ethyl acetate (3×30 mL). The combined organic layers were dried over anhydrous sodium sulfate and concentrated under reduced pressure. The crude material obtained was then purified by column chromatography on silica gel.

**General procedure D for the synthesis of anilines** (adapted from reported literature procedure<sup>3</sup>):

A flame-dried 100 mL round-bottom equipped with a magnetic stir bar was charged with phenols (10.0 mmol, 1.0 equiv.), 4-nitrobenzoyl chloride (12.0 mmol, 1.2 equiv.), and DMAP (1.0 mmol, 10 mol%), before DCM (25 mL) was added. To the resulting solution, Et<sub>3</sub>N (15.0 mmol, 1.5 equiv.) was added dropwise at 0 °C (ice bath). Then the reaction was allowed to warm up to room temperature and stirred for an additional 12 h. After the reaction was complete, HCl (1M, aq., 30 mL) was added to reaction mixture. The mixture was then extracted using DCM (3×30 mL) and the layers were separated. The organic layers were combined, washed with brine (25 mL), dried over anhydrous sodium sulfate, filtered, and concentrated with the aid of a rotary evaporator. The solvent was removed under reduced pressure with the aid of a rotary evaporator. The crude product was directly used in the next step without further purification.

To the methanol (10 mL) and THF (10 mL) solution of nitro compounds, 10% palladium on active carbon (202 mg) was added under Argon atmosphere. Hydrogen gas was bubbled into the suspension with stirring at room temperature for 15 h. After the palladium on carbon was removed by filtration, the solvent was removed under reduced pressure, to afford the corresponding anilines.

## General information of Stability studies

Solution of **3r** (10 mmol/L, 5 mL) and internal standard ((trifluoromethyl)benzene, 0.23 mmol/L, 14.4  $\mu$ L) in deuterated acetonitrile was prepared. In an NMR tube, 0.25 mL of the solution with 0.25 mL of respective aqueous solutions or solvents. Remaining of the **3r** was determined based on  $^{19}\text{F}$  NMR analysis at room temperature.  $^{19}\text{F}$  NMR analysis were Performed at 1 hour, 5 hours, 10 hours, 15 hours, 24 hours and 48 hours respectively.

pH 4.00 (sigma-aldrich, B5020), pH 7.00 (sigma-aldrich, B4770), and pH 10.00 (sigma-aldrich, B4895) buffers and saline (sigma-aldrich, 806544) were commercially available. Hydrochloric acid solution with concentration of 1 mol/L (initial pH 1) and sodium hydroxide solution with concentration of 1 mol/L (initial pH 14) were prepared in the lab. The water was deionized. Anhydrous dimethyl sulfoxide and acetonitrile were purchased from sigma-aldrich.

## Optimization of the Reaction Conditions (Method with H-tube)

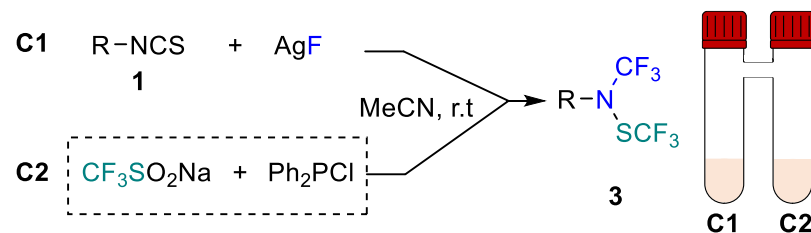

| Chamber 1       |            |                |          |                | Chamber 2                |                                         |          |          |                | Yields <sup>[a]</sup> |
|-----------------|------------|----------------|----------|----------------|--------------------------|-----------------------------------------|----------|----------|----------------|-----------------------|
| <b>1r</b> /mmol | AgF/mmol   | additive       | MeCN/mL  | Temperature/°C | Ph <sub>2</sub> PCl/mmol | CF <sub>3</sub> SO <sub>2</sub> Na/mmol | additive | MeCN/mL  | Temperature/°C |                       |
| 0.2             | 0.8        | \              | 1        | r.t            | 0.6                      | 0.6                                     | \        | 1        | r.t            | 60%                   |
| <b>0.2</b>      | <b>0.8</b> | \              | <b>1</b> | <b>r.t</b>     | <b>1.2</b>               | <b>0.6</b>                              | \        | <b>1</b> | <b>r.t</b>     | <b>80%</b>            |
| 0.2             | 0.8        | \              | 2        | r.t            | 1.2                      | 0.6                                     | \        | 1        | r.t            | 65%                   |
| 0.2             | 0.8        | \              | 0.5      | r.t            | 1.2                      | 0.6                                     | \        | 1        | r.t            | 55%                   |
| 0.2             | 0.8        | \              | 1        | r.t            | 2.4                      | 1.2                                     | \        | 1        | r.t            | 80%                   |
| 0.2             | 0.8        | \              | 1        | r.t            | 1.8                      | 0.9                                     | \        | 1        | r.t            | 80%                   |
| 0.2             | 1          | \              | 1        | r.t            | 1.2                      | 0.6                                     | \        | 1        | r.t            | 80%                   |
| 0.2             | 0.6        | \              | 1        | r.t            | 1.2                      | 0.6                                     | \        | 1        | r.t            | 55%                   |
| 0.2             | 1.2        | \              | 1        | r.t            | 1.2                      | 0.6                                     | \        | 1        | r.t            | 55%                   |
| 0.2             | 0.8        | \              | 1        | r.t            | 1.2                      | 0.6                                     | \        | 1        | 35             | 70%                   |
| 0.2             | 0.8        | CsF (0.2 mmol) | 1        | r.t            | 1.2                      | 0.6                                     | \        | 1        | r.t            | 35%                   |

[a] reaction with standard condition was performed for 16 hours with: Chamber 1 (C1): **1r** (0.2 mmol, 1 equiv.), AgF (0.8 mmol, 4 equiv.) in MeCN (1 mL); Chamber 2 (C2): CF<sub>3</sub>SO<sub>2</sub>Na (1.2 mmol, 6 equiv.), Ph<sub>2</sub>PCl (0.6 mmol, 3 equiv.) in MeCN (1 mL), Yield determined by <sup>19</sup>F NMR spectroscopy with PhCF<sub>3</sub> as an internal standard.

## Optimization of the Solvents (Method H-tube)

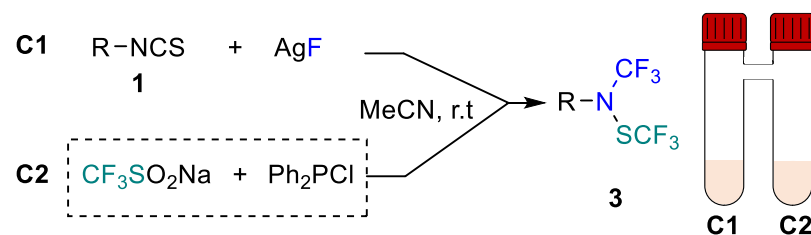

| Chamber 1       |            |                   |                | Chamber 2                |                                         |                   |                | Yields <sup>[a]</sup> |
|-----------------|------------|-------------------|----------------|--------------------------|-----------------------------------------|-------------------|----------------|-----------------------|
| <b>1r</b> /mmol | AgF/mmol   | Solvents/1 mL     | Temperature/°C | Ph <sub>2</sub> PCl/mmol | CF <sub>3</sub> SO <sub>2</sub> Na/mmol | Solvents/1 mL     | Temperature/°C |                       |
| <b>0.2</b>      | <b>0.8</b> | <b>MeCN</b>       | <b>r.t</b>     | <b>1.2</b>               | <b>0.6</b>                              | <b>MeCN</b>       | <b>r.t</b>     | <b>80%</b>            |
| 0.2             | 0.8        | THF               | r.t            | 1.2                      | 0.6                                     | MeCN              | r.t            | 8%                    |
| 0.2             | 0.8        | DMF               | r.t            | 1.2                      | 0.6                                     | MeCN              | r.t            | 55%                   |
| 0.2             | 0.8        | Toluene           | r.t            | 1.2                      | 0.6                                     | MeCN              | r.t            | 11%                   |
| 0.2             | 0.8        | DCM               | r.t            | 1.2                      | 0.6                                     | MeCN              | r.t            | 8%                    |
| 0.2             | 0.8        | Et <sub>2</sub> O | r.t            | 1.2                      | 0.6                                     | MeCN              | r.t            | 30%                   |
| 0.2             | 0.8        | 1,4-Dioxane       | r.t            | 1.2                      | 0.6                                     | MeCN              | r.t            | 20%                   |
| 0.2             | 0.8        | MeCN              | r.t            | 1.2                      | 0.6                                     | THF               | r.t            | 51%                   |
| 0.2             | 0.8        | MeCN              | r.t            | 1.2                      | 0.6                                     | DMF               | r.t            | 43%                   |
| 0.2             | 0.8        | MeCN              | r.t            | 1.2                      | 0.6                                     | Toluene           | r.t            | 69%                   |
| 0.2             | 0.8        | MeCN              | r.t            | 1.2                      | 0.6                                     | DCM               | r.t            | 46%                   |
| 0.2             | 0.8        | MeCN              | r.t            | 1.2                      | 0.6                                     | Et <sub>2</sub> O | r.t            | 72%                   |
| 0.2             | 0.8        | MeCN              | r.t            | 1.2                      | 0.6                                     | 1,4-Dioxane       | r.t            | 55%                   |

[a] reaction with standard condition was performed for 16 hours with: Chamber 1 (C1): **1r** (0.2 mmol, 1 equiv.), AgF (0.8 mmol, 4 equiv.) in MeCN (1 mL); Chamber 2 (C2): CF<sub>3</sub>SO<sub>2</sub>Na (1.2 mmol, 6 equiv.), Ph<sub>2</sub>PCl (0.6 mmol, 3 equiv.) in MeCN (1 mL), Yield determined by <sup>19</sup>F NMR spectroscopy with PhCF<sub>3</sub> as an internal standard.

## Mechanism Investigation

**General procedure for the synthesis trifluoro((trifluoromethyl)sulfinothioyl)methane:**

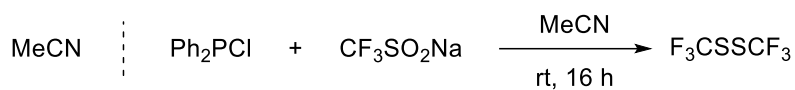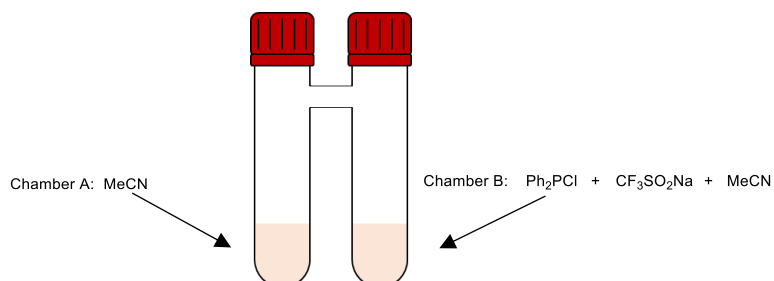

To a H-tube were sequentially added acetonitrile (1 mL) to chamber A. Then sodium triflate (0.6 mmol, 3.0 equiv.) and acetonitrile (1 mL) were added to chamber B. After sealing the H-tube, chlorodiphenylphosphine (1.2 mmol, 3.0 equiv.) was added to chamber B by syringe. The mixture was stirred at room temperature overnight. After completion, the internal standard (trifluoromethyl)benzene (30  $\mu\text{L}$ , 0.244 mmol) was added, and the  $^{19}\text{F}$ -NMR spectra is shown as follow:

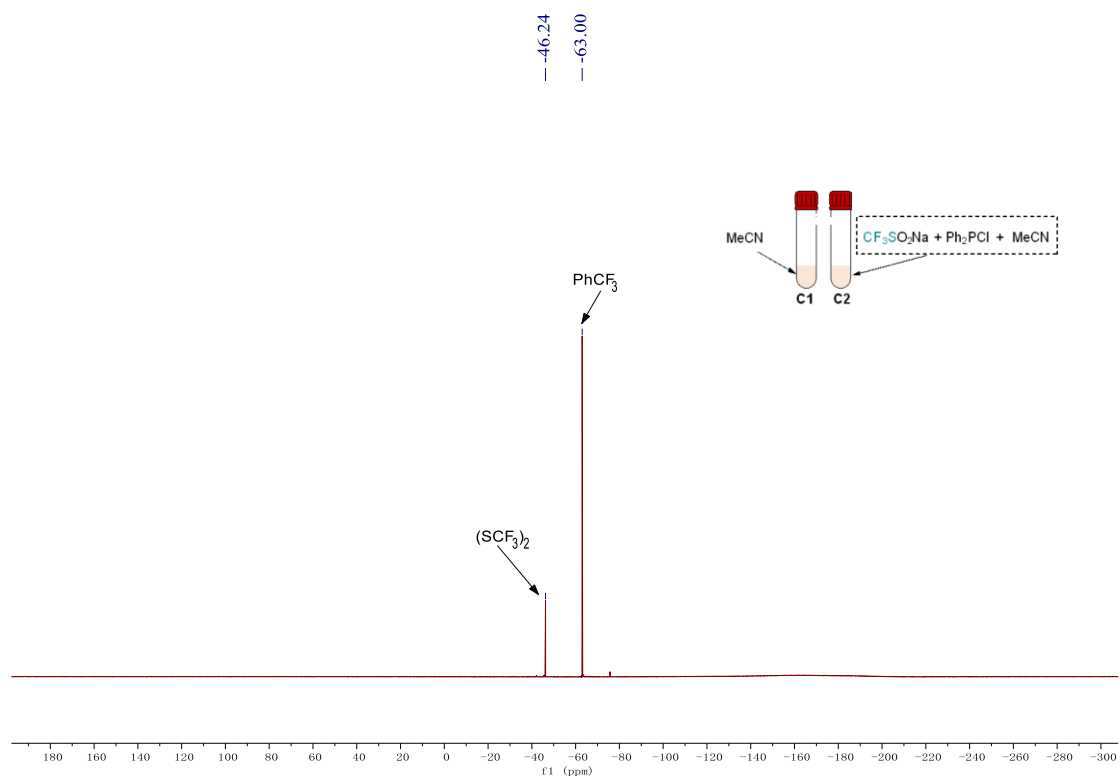



## Characterization of starting materials

### 4-(isothiocyanatomethyl)-1,1'-biphenyl (**1b**)

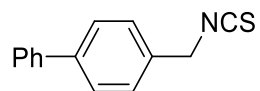

The compound **1b** was obtained as a white solid in 63% yield using [1,1'-biphenyl]-4-ylmethanamine following the general procedure A after column chromatography on silica gel with pentane.

$^1\text{H NMR}$  (300 MHz, Chloroform-*d*)  $\delta$  7.55 – 7.46 (m, 4H), 7.40 – 7.32 (m, 2H), 7.32 – 7.22 (m, 3H), 4.64 (s, 2H).

$^{13}\text{C}\{^1\text{H}\}$  NMR (75 MHz, Chloroform-*d*)  $\delta$  141.4, 140.3, 133.2, 132.5, 128.9, 127.7, 127.6, 127.4, 127.1, 48.5.

Characterization data matched that reported in the literature<sup>4</sup>

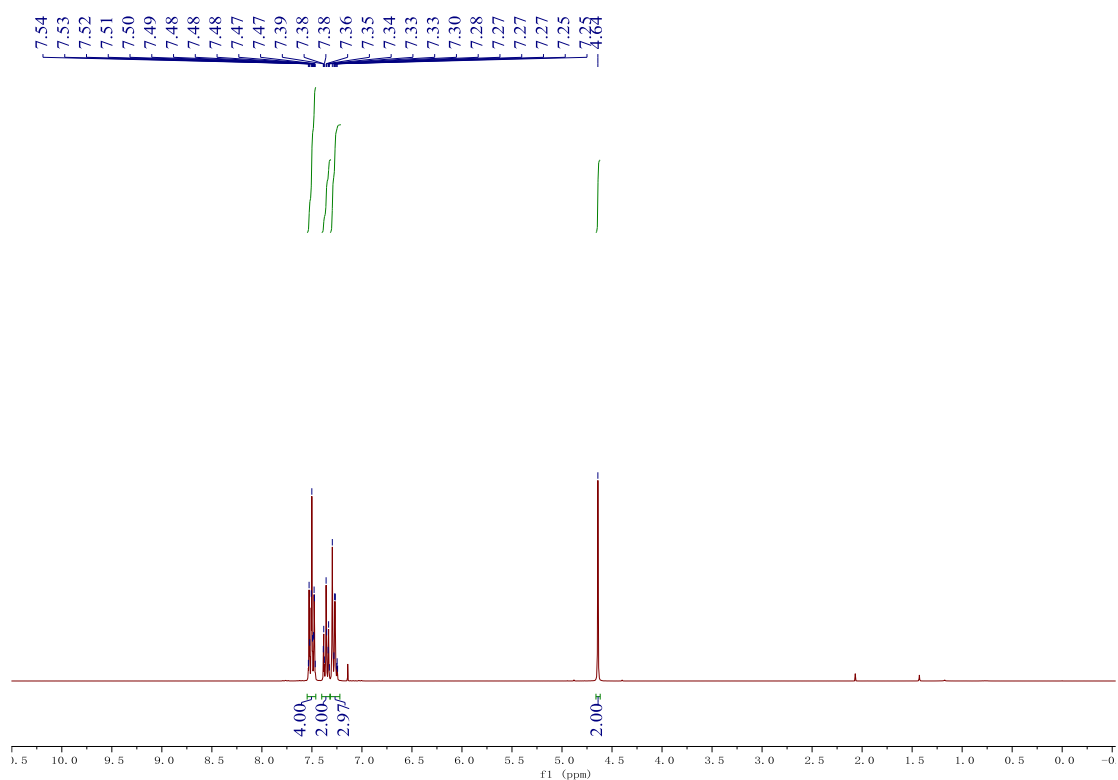

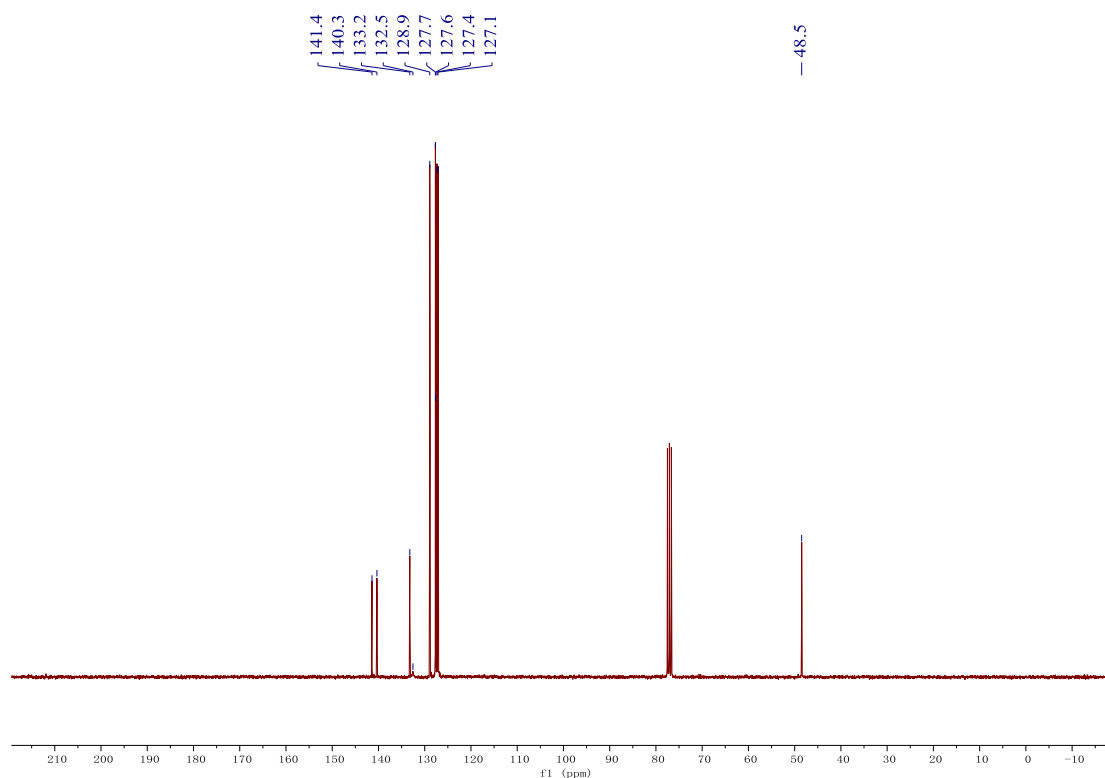

### tert-butyl 3-(2-isothiocyanatoethyl)-1H-indole-1-carboxylate (**1d**)

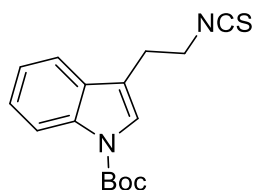

3-(2-Isothiocyanatoethyl)-1H-indole was obtained as a colorless oil in 82% yield using 2-(1H-indol-3-yl)ethan-1-amine following the general procedure C after column chromatography on silica gel with cyclohexane/ethyl acetate (5/1).

The compound **1d** was obtained as a colorless oil in 70% yield following literature's procedure<sup>5</sup>: 3-(2-isothiocyanatoethyl)-1H-indole (808 mg, 1.0 equiv.) was added to a reaction tube and dissolved in DCM (2.0 mL). Triethylamine (0.66 mL, 1.2 equiv.) and 4-dimethylaminopyridine (48 mg, 0.1 equiv.) were added to the reaction tube. Boc anhydride (1.05 g, 2.4 equiv.) was dissolved in DCM (4 mL) and added to the reaction tube. The mixture was stirred in the sealed tube at rt for 10 h. The reaction mixture was extracted with a saturated solution of NH<sub>4</sub>Cl (5.0 mL), water (5.0 mL) and a saturated solution of NaCl (5.0 mL). The combined organic layers were dried over Na<sub>2</sub>SO<sub>4</sub> and the volatiles were removed under reduced pressure. The residue was purified by column chromatography on silica gel with cyclohexane/ethyl acetate (50/1).

<sup>1</sup>H NMR (300 MHz, Chloroform-*d*) δ 8.05 (d, *J* = 8.2 Hz, 1H), 7.37 (s, 1H), 7.35 – 7.32 (m, 1H), 7.24 – 7.19 (m, 1H), 7.15 – 7.10 (m, 1H), 3.62 (t, *J* = 6.9 Hz, 2H), 2.93 (t, *J* = 6.8 Hz, 2H), 1.55 (s, 9H).

<sup>13</sup>C{<sup>1</sup>H} NMR (75 MHz, Chloroform-*d*) δ 149.5, 135.6, 131.1, 129.8, 124.7, 124.2, 122.7, 118.5,

115.8, 115.5, 83.8, 28.2, 27.0, 26.2.

HRMS (ESI) calculated for  $C_{16}H_{19}N_2O_2S$ : 303.1162  $[M+H]^+$ , Found: 303.1161.

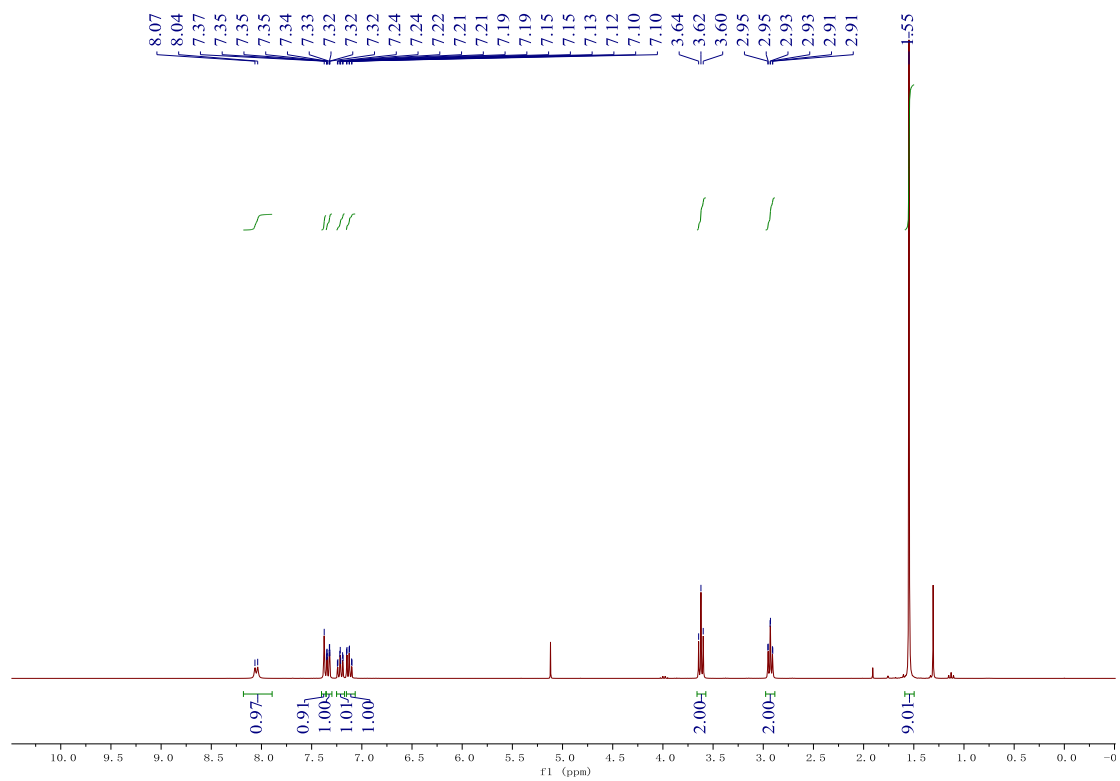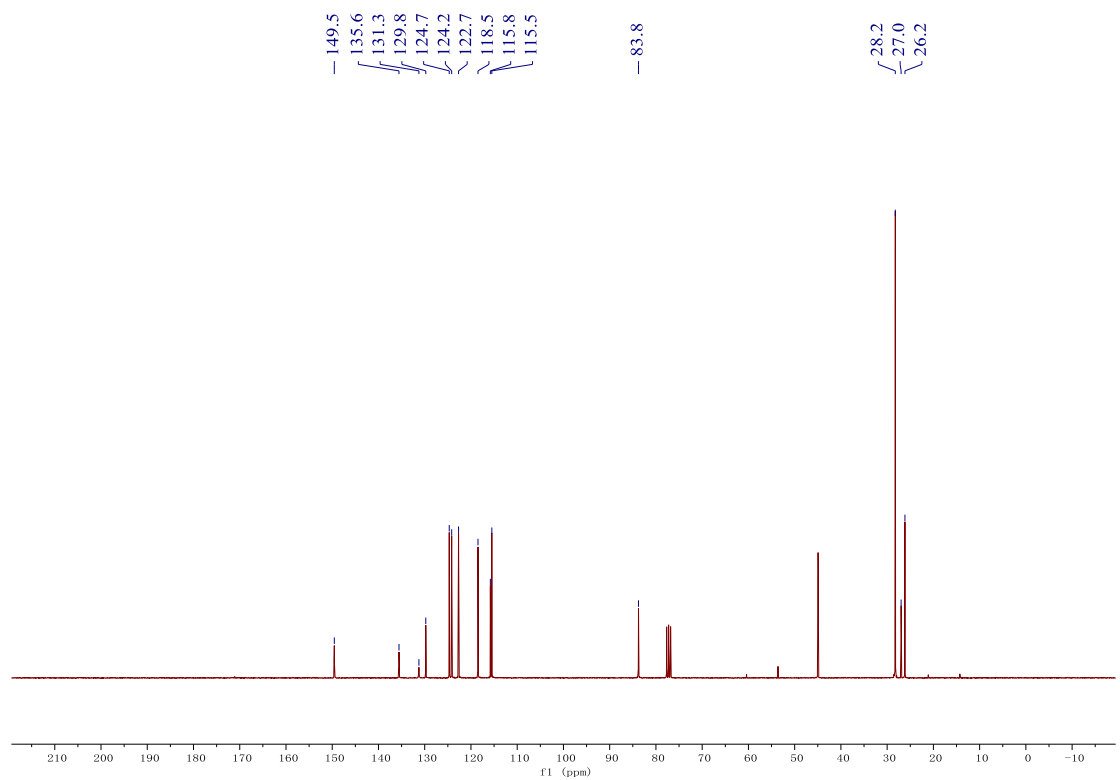

CENTRE COMMUN DE SPECTROMETRIE DE MASSE

**Analysis Info**

Analysis Name Impact2\_220718\_06\_YY400-P1.d  
 Method Tune\_pos\_Standard.m  
 Comment  
 Acquisition Date 7/18/2022 4:57:33 PM  
 Instrument / Ser# impact II 1825265.1  
 0081

**Acquisition Parameter**

|             |          |                       |           |                  |           |
|-------------|----------|-----------------------|-----------|------------------|-----------|
| Source Type | ESI      | Ion Polarity          | Positive  | Set Nebulizer    | 0.3 Bar   |
| Focus       | Active   | Set Capillary         | 4500 V    | Set Dry Heater   | 200 °C    |
| Scan Begin  | 50 m/z   | Set End Plate Offset  | -500 V    | Set Dry Gas      | 4.0 l/min |
| Scan End    | 1000 m/z | Set Collision Cell RF | 750.0 Vpp | Set Divert Valve | Source    |

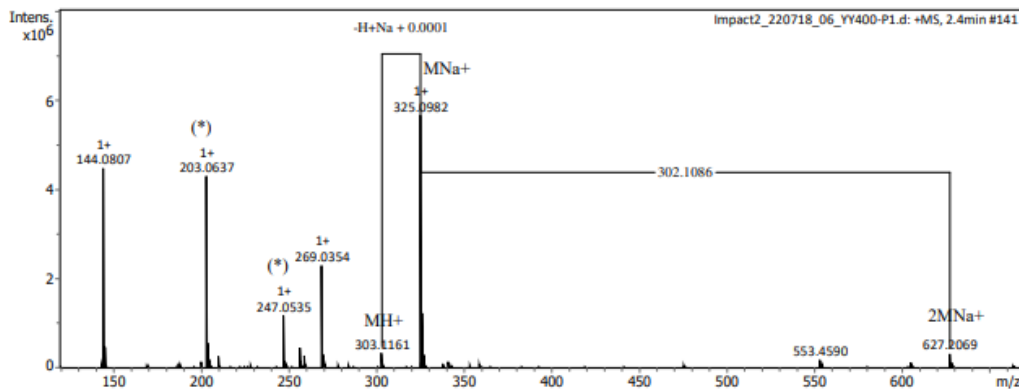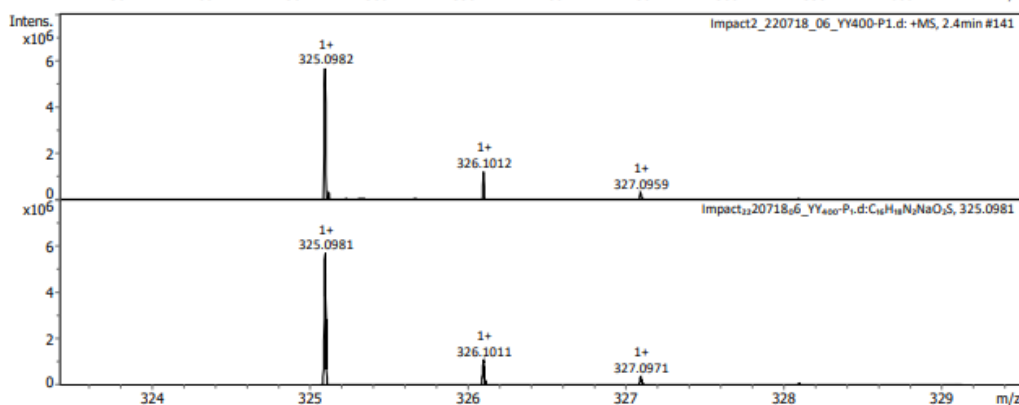

| Meas. m/z | Ion Formula    | m/z      | Sum Formula | err [ppm] | mSigma | Adduct | z  |
|-----------|----------------|----------|-------------|-----------|--------|--------|----|
| 303.1161  | C16H19N2O2S    | 303.1162 | C16H18N2O2S | 0.1       | 11.5   | M+H    | 1+ |
| 325.0982  | C16H18N2NaO2S  | 325.0981 |             | -0.3      | 14.8   | M+Na   | 1+ |
| 627.2069  | C32H36N4NaO4S2 | 627.2070 |             | 0.3       | 13.3   | 2M+Na  | 1+ |

**2-(2-isothiocyanatopropoxy)-1,3-dimethylbenzene (1e)**

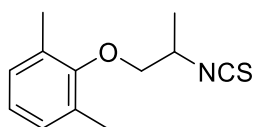

The compound **1e** was obtained as a colorless oil in 74% yield using 1-(2,6-dimethylphenoxy)propan-2-amine hydrochloride following the general procedure A after column chromatography on silica gel with pentane.

<sup>1</sup>H NMR (300 MHz, Chloroform-*d*) δ 6.95 – 6.92 (m, 2H), 6.89 – 6.84 (m, 1H), 4.12 – 4.01 (m, 1H),

3.71 (d,  $J = 5.5$  Hz, 2H), 2.22 (s, 6H), 1.42 (d,  $J = 6.7$  Hz, 3H).

$^{13}\text{C}\{^1\text{H}\}$  NMR (75 MHz, Chloroform- $d$ )  $\delta$  154.7, 132.8, 130.8, 129.0, 124.4, 74.2, 53.6, 18.4, 16.3.

Characterization data matched that reported in the literature<sup>2</sup>

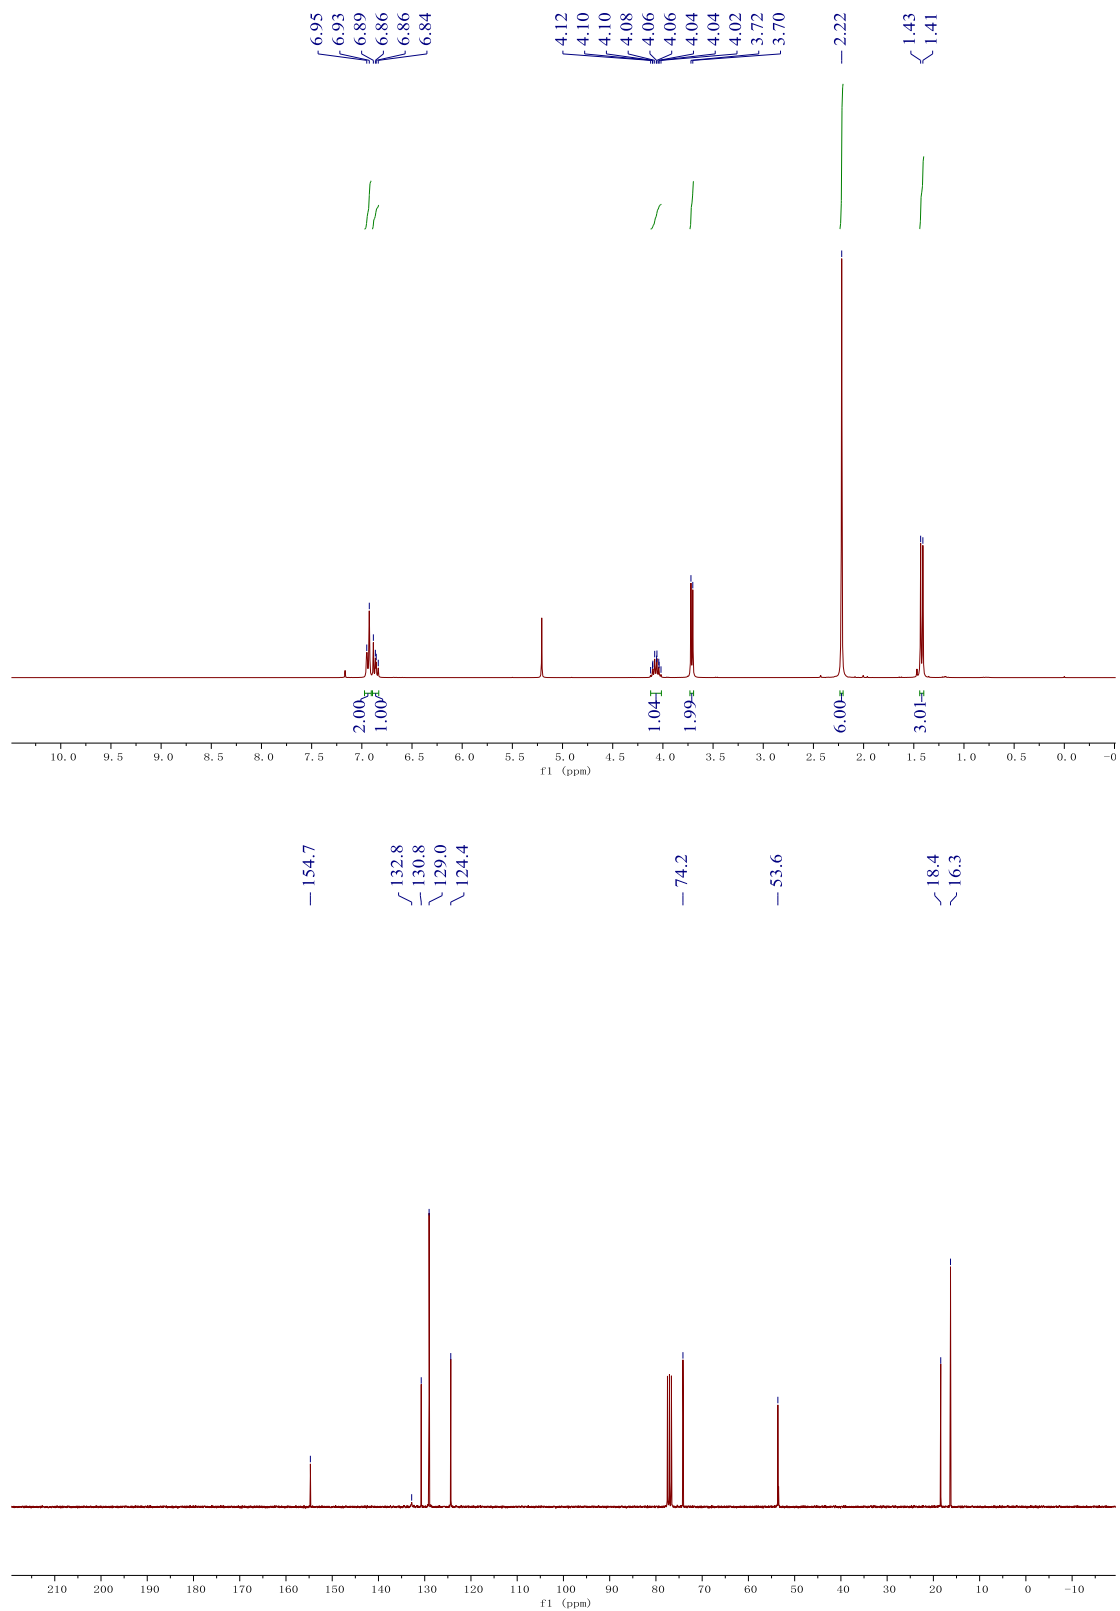

**(3-isothiocyanatopropyl)benzene (1f)**

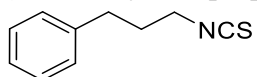

The compound **1f** was obtained as a colorless oil in 99% yield using 3-phenylpropan-1-amine following the general procedure A after column chromatography on silica gel with cyclohexane.

$^1\text{H}$  NMR (300 MHz, Chloroform-*d*)  $\delta$  7.35 – 7.30 (m, 2H), 7.27 – 7.15 (m, 3H), 3.51 (t,  $J = 6.5$  Hz, 2H), 2.77 (t,  $J = 7.4$  Hz, 2H), 2.08 – 1.98 (m, 2H).

$^{13}\text{C}\{^1\text{H}\}$  NMR (75 MHz, Chloroform-*d*)  $\delta$  139.9, 128.6, 128.8, 126.4, 44.1, 32.5, 31.4.

Characterization data matched that reported in the literature<sup>6</sup>

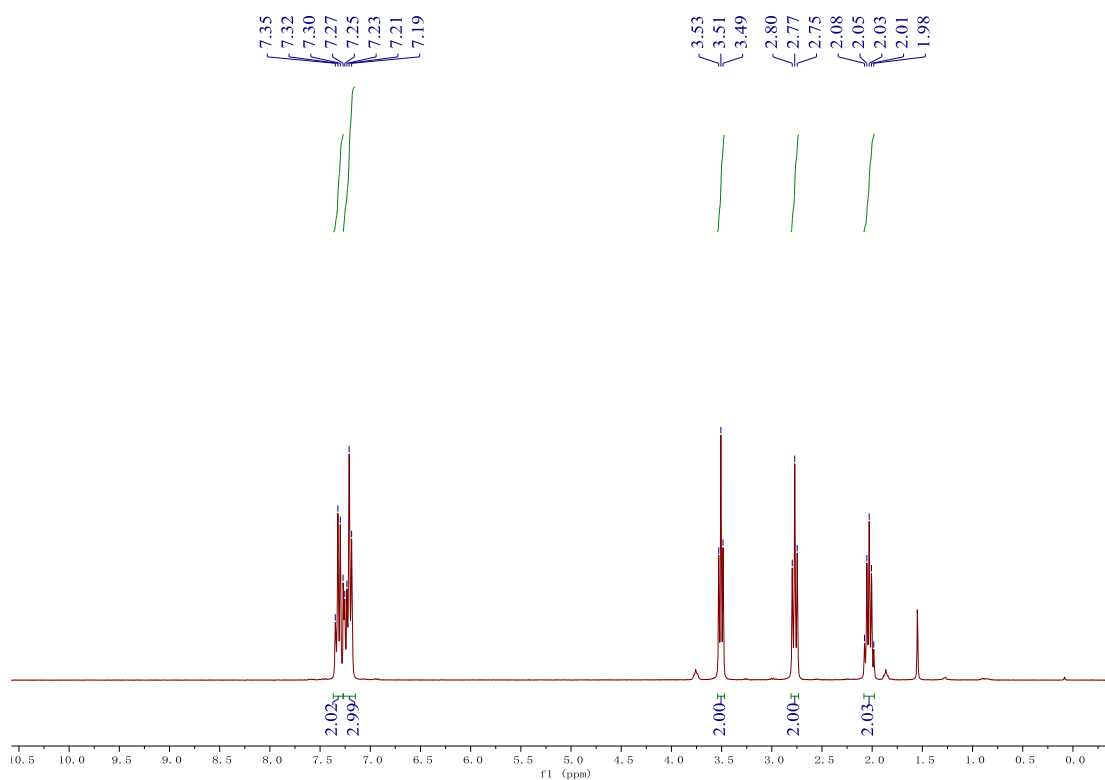

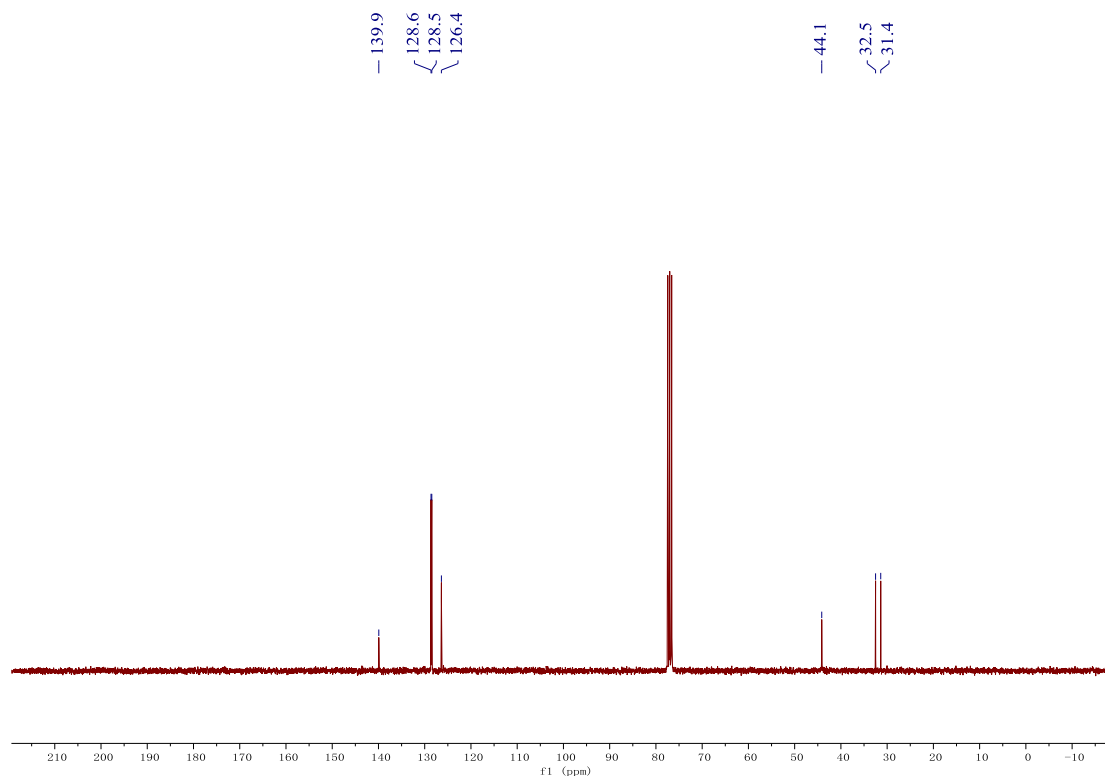

### 1-benzyl-4-isothiocyanatopiperidine (**1g**)

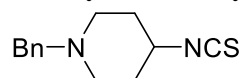

The compound **1g** was obtained as a yellow oil in 40% yield using 1-benzylpiperidin-4-amine following the general procedure A after column chromatography on silica gel with pentane/ethyl acetate (10/1).

$^1\text{H}$  NMR (300 MHz, Chloroform-*d*)  $\delta$  7.36 – 7.06 (m, 5H), 3.68 – 3.63(m, 1H), 3.42 (s, 2H), 2.57 – 2.50 (m, 2H), 2.27 – 2.20 (m, 2H), 1.92 – 1.83 (m, 2H), 1.81 – 1.70 (m, 2H).

$^{13}\text{C}\{^1\text{H}\}$  NMR (75 MHz, Chloroform-*d*)  $\delta$  138.2, 131.0, 129.0, 128.3, 127.2, 63.0, 53.4, 50.3, 32.5.

HRMS (ESI) calculated for  $\text{C}_{13}\text{H}_{17}\text{N}_2\text{S}$ : 233.1107  $[\text{M}+\text{H}]^+$ , Found: 233.1110

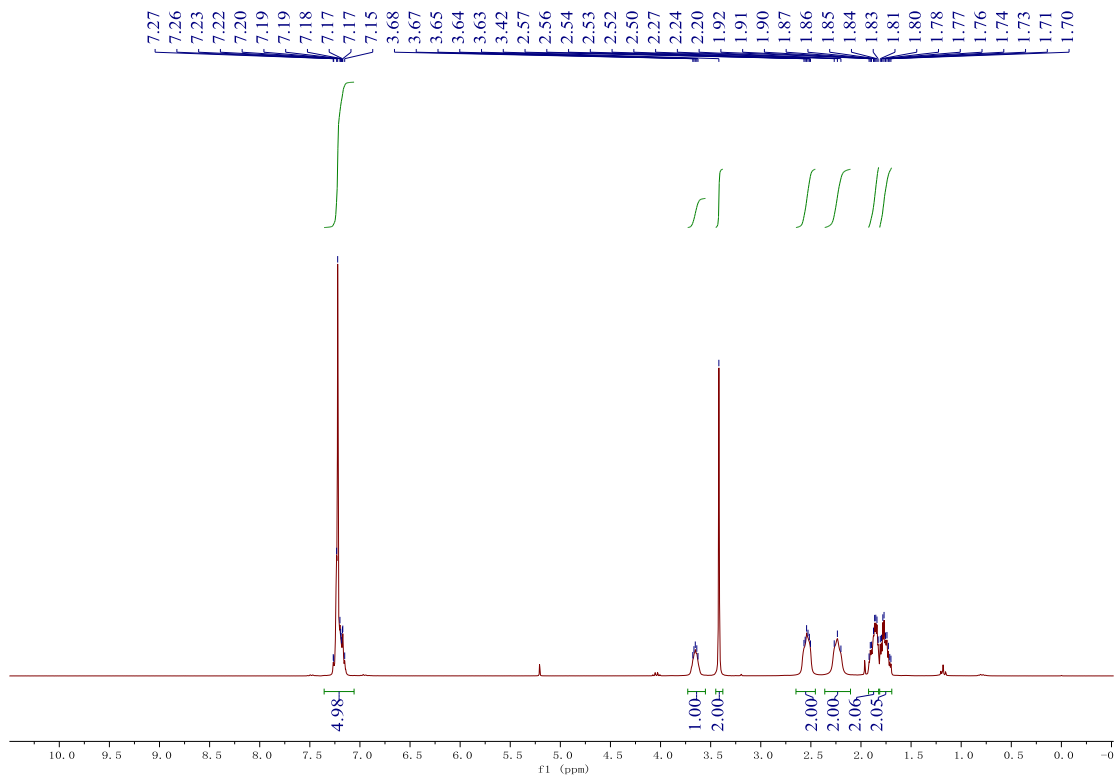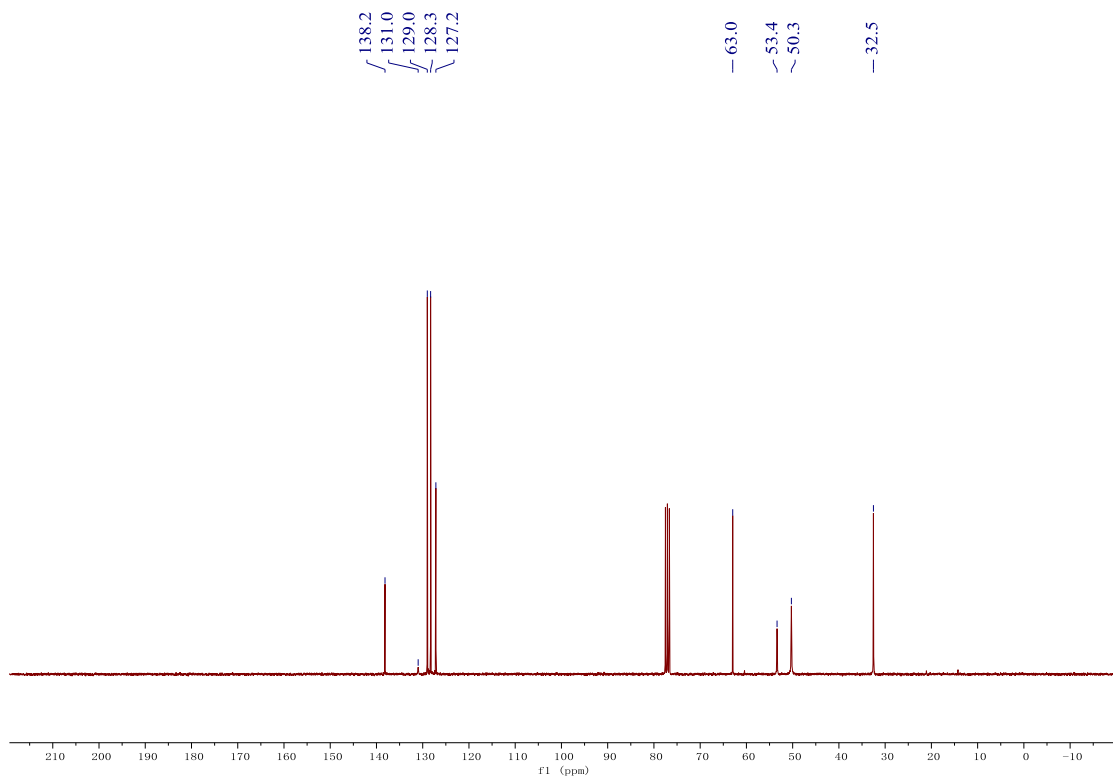



CENTRE COMMUN DE SPECTROMETRIE DE MASSE

**Analysis Info**

Analysis Name Impact2\_220719\_06\_YY293-P2.d  
 Method Tune\_pos\_Standard.m  
 Comment  
 Acquisition Date 7/19/2022 1:53:52 PM  
 Instrument / Ser# impact II 1825265.1  
 0081

**Acquisition Parameter**

|             |          |                       |           |                  |           |
|-------------|----------|-----------------------|-----------|------------------|-----------|
| Source Type | ESI      | Ion Polarity          | Positive  | Set Nebulizer    | 0.3 Bar   |
| Focus       | Active   | Set Capillary         | 4500 V    | Set Dry Heater   | 200 °C    |
| Scan Begin  | 50 m/z   | Set End Plate Offset  | -500 V    | Set Dry Gas      | 4.0 l/min |
| Scan End    | 1000 m/z | Set Collision Cell RF | 750.0 Vpp | Set Divert Valve | Source    |

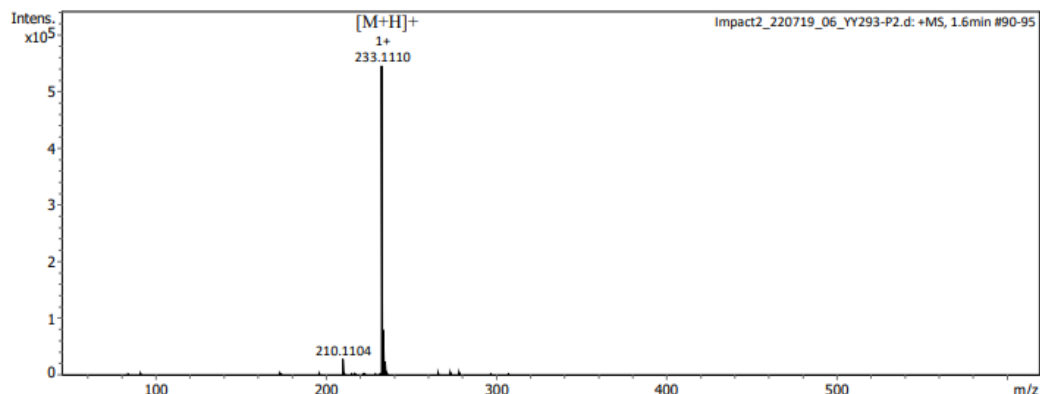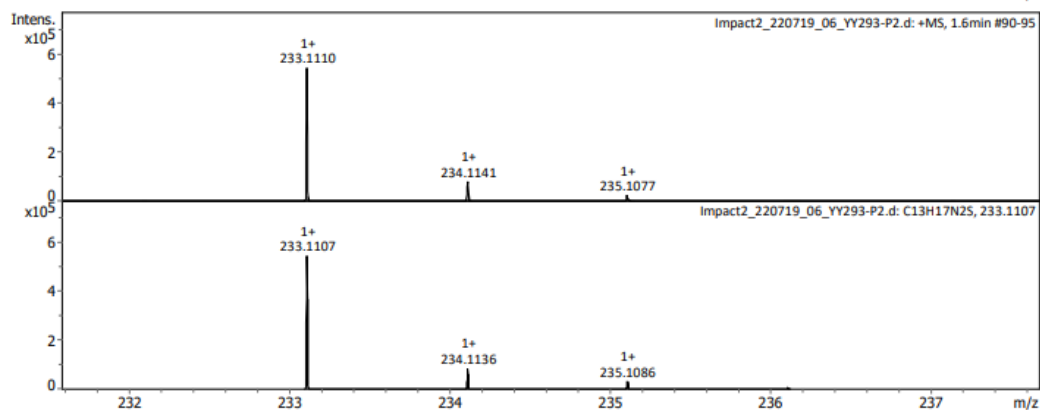

| Meas. m/z | Ion Formula | m/z      | Sum Formula | err [ppm] | mSigma | Adduct | z  |
|-----------|-------------|----------|-------------|-----------|--------|--------|----|
| 233.1110  | C13H17N2S   | 233.1107 | C13H16N2S   | -1.2      | 8.3    | M+H    | 1+ |

**tert-butyl 4-isothiocyanatopiperidine-1-carboxylate (1h)**

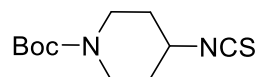

The compound **1h** was obtained as a colorless oil in 91% yield using tert-butyl 4-aminopiperidine-1-carboxylate following the general procedure A after column chromatography on silica gel with pentane/ethyl acetate (20/1).

<sup>1</sup>H NMR (300 MHz, Chloroform-*d*) δ 3.98 (sept, *J* = 7.4, 3.8 Hz, 1H), 3.73 – 3.65 (m, 2H), 3.46 – 3.38 (m, 2H), 2.03 – 1.94 (m, 2H), 1.89 – 1.78 (m, 2H), 1.53 (s, 9H).

<sup>13</sup>C{<sup>1</sup>H} NMR (75 MHz, Chloroform-*d*) δ 154.4, 132.2, 79.9, 53.2, 40.6, 32.1, 28.3.

Characterization data matched that reported in the literature<sup>2</sup>

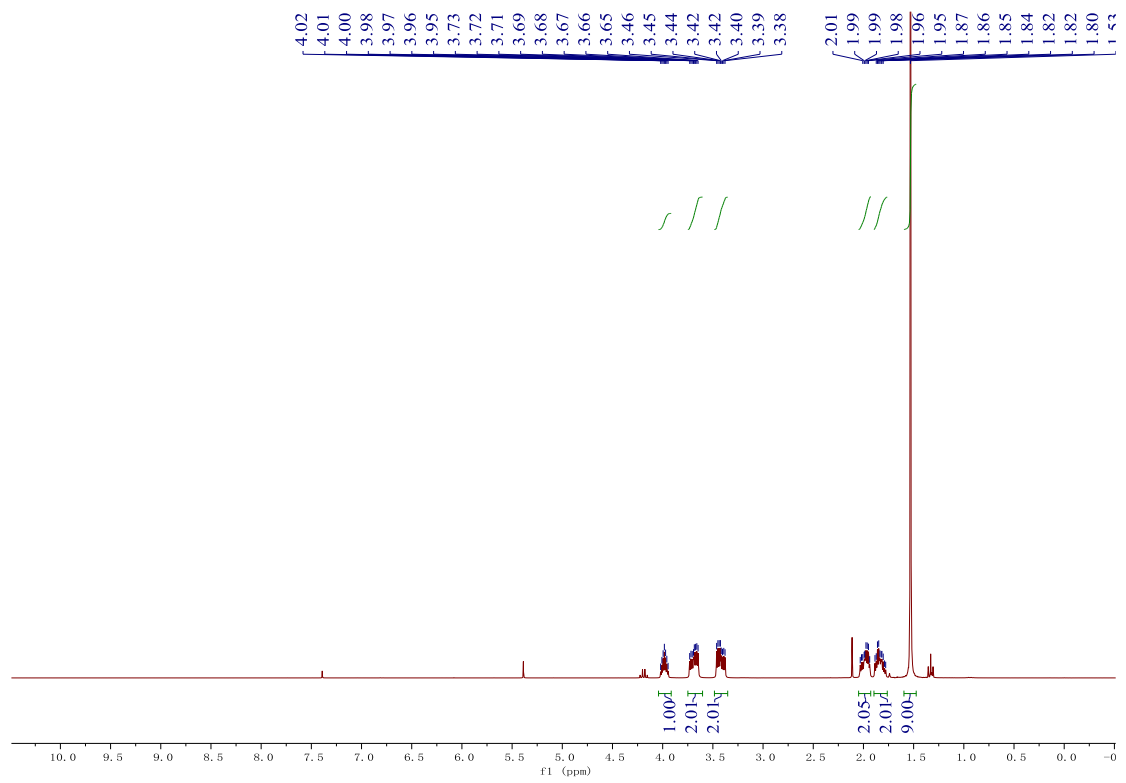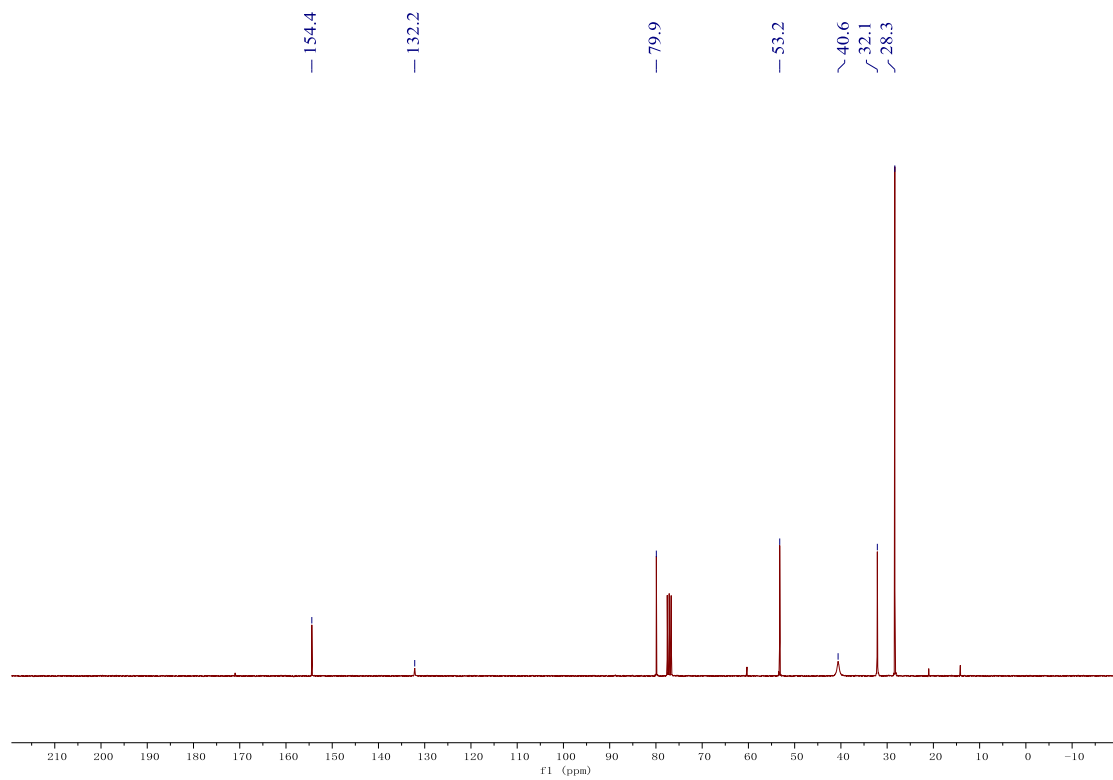

**5-isothiocyanatobenzo[d][1,3]dioxole (1)**

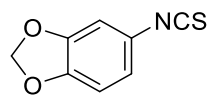

The compound **11** was obtained as a white solid in 77% yield using benzo[d][1,3]dioxol-5-amine following the general procedure A after column chromatography on silica gel with cyclohexane.

$^1\text{H}$  NMR (300 MHz, Chloroform-*d*)  $\delta$  6.76-6.73 (m, 3H), 6.02 (s, 2H).

$^{13}\text{C}\{^1\text{H}\}$  NMR (75 MHz, Chloroform-*d*)  $\delta$  148.2, 146.9, 119.6, 108.5, 106.7, 102.0.

Characterization data matched that reported in the literature<sup>7</sup>

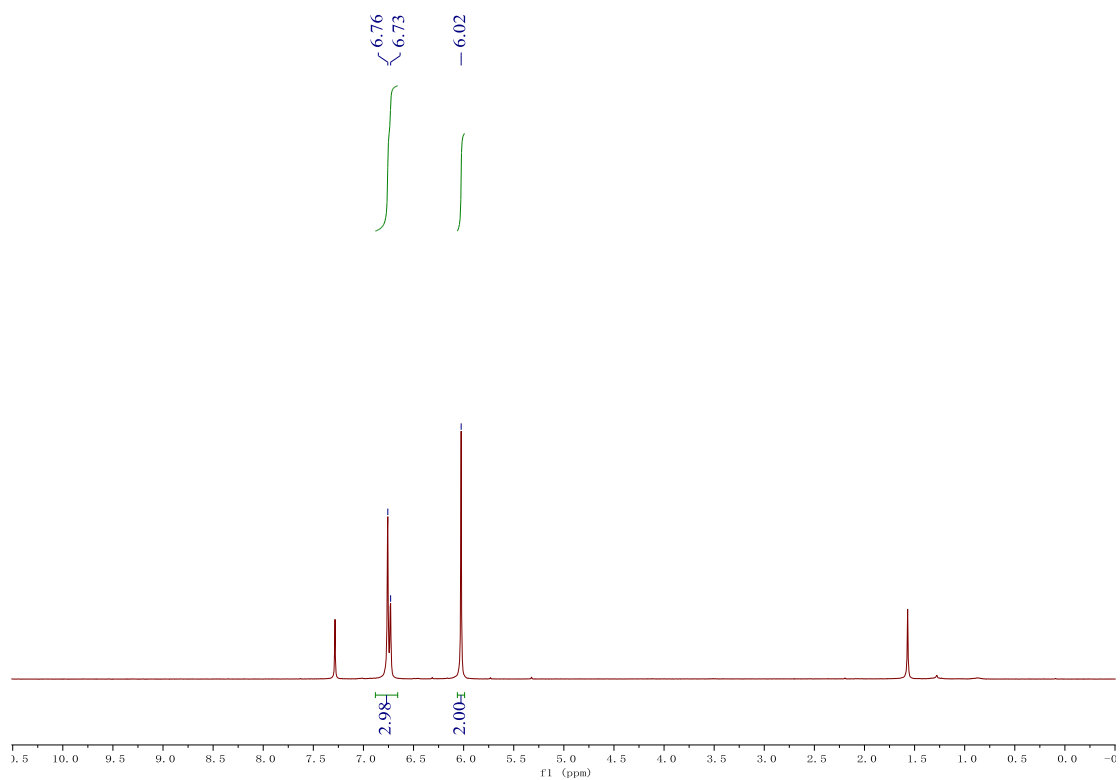

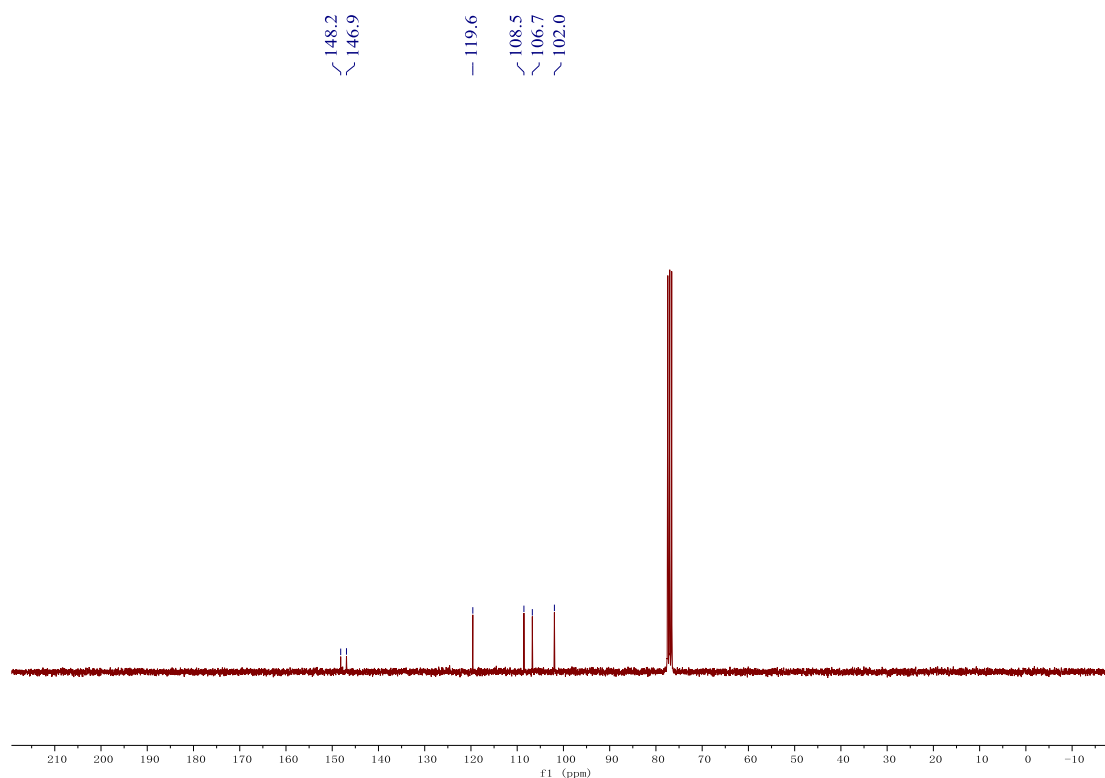

### 1-(benzyloxy)-4-isothiocyanatobenzene (**1m**)

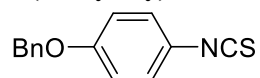

The compound **1m** was obtained as a white solid in 75% yield using 4-(benzyloxy)aniline following the general procedure A after column chromatography on silica gel with pentane.

$^1\text{H}$  NMR (300 MHz, Chloroform-*d*)  $\delta$  7.44 – 7.15 (m, 5H), 7.12 – 7.00 (m, 2H), 6.90 – 6.77 (m, 2H), 4.97 (s, 2H).

$^{13}\text{C}\{^1\text{H}\}$  NMR (75 MHz, Chloroform-*d*)  $\delta$  157.7, 136.3, 134.1, 128.7, 128.2, 127.5, 127.0, 123.9, 115.8, 70.3.

Characterization data matched that reported in the literature<sup>8</sup>

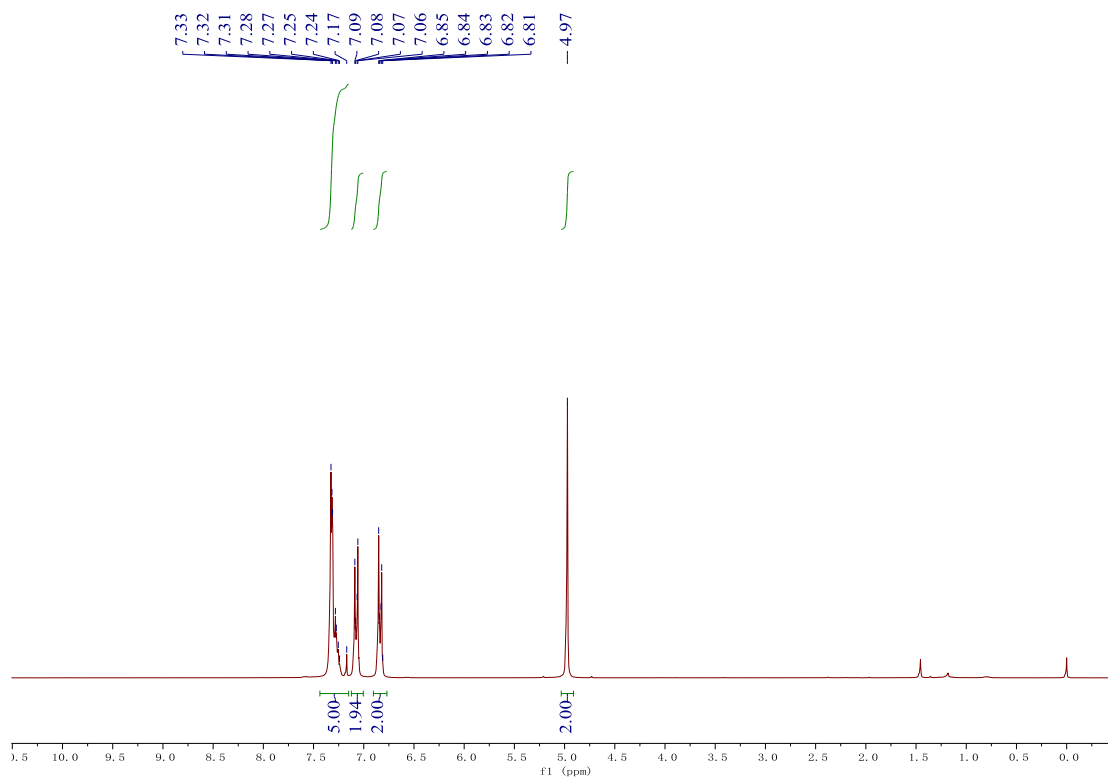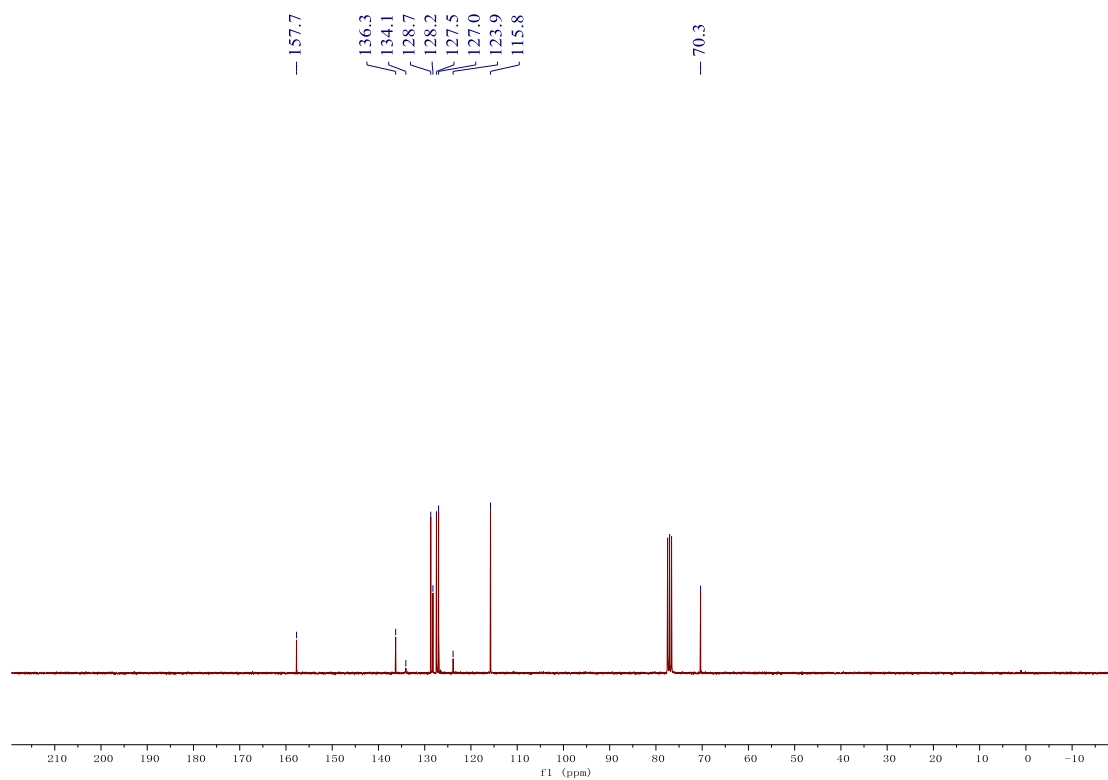

**4-(4-isothiocyanatophenyl)morpholine (1o)**

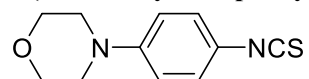

The compound **1o** was obtained as a white solid in 83% yield using 4-morpholinoaniline following

the general procedure A after column chromatography on silica gel with pentane/ethyl acetate (8/1).

$^1\text{H}$  NMR (300 MHz, Chloroform-*d*)  $\delta$  7.12 – 7.01 (m, 2H), 6.78 – 6.72 (m, 2H), 3.81 – 3.75 (m, 4H), 3.12 – 3.07 (m, 4H).

$^{13}\text{C}\{^1\text{H}\}$  NMR (75 MHz, Chloroform-*d*)  $\delta$  150.1, 133.4, 126.7, 122.1, 115.7, 66.7, 48.6.

Characterization data matched that reported in the literature<sup>9</sup>

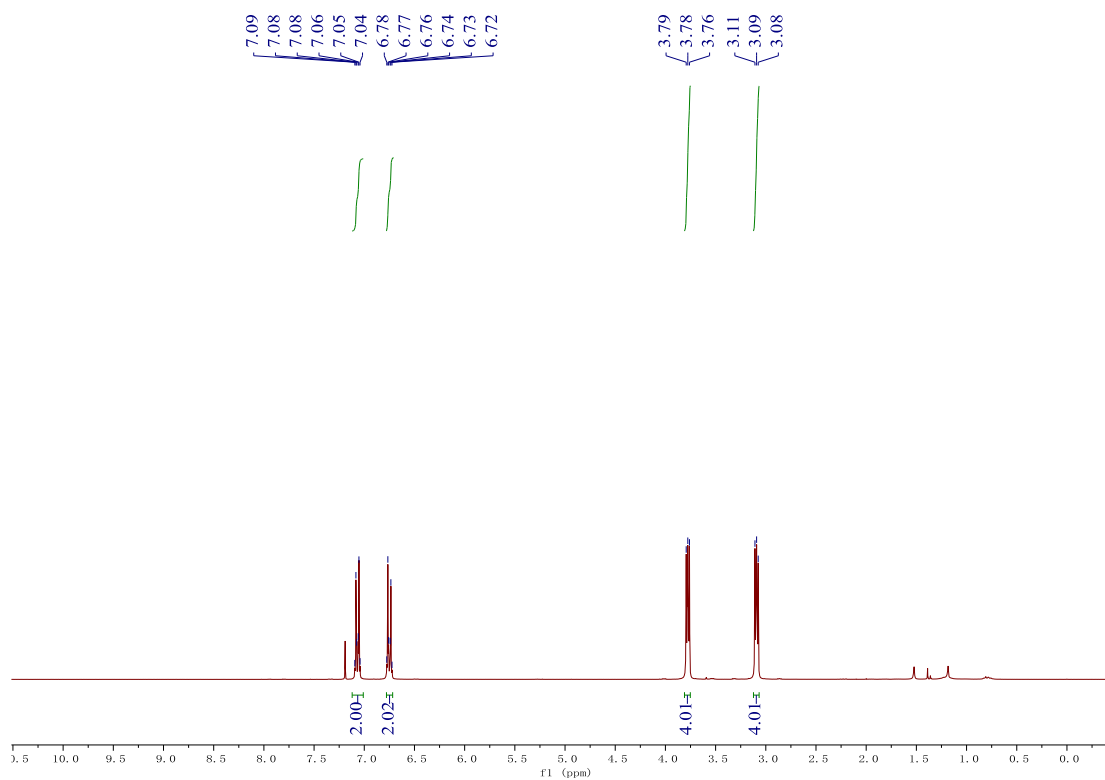

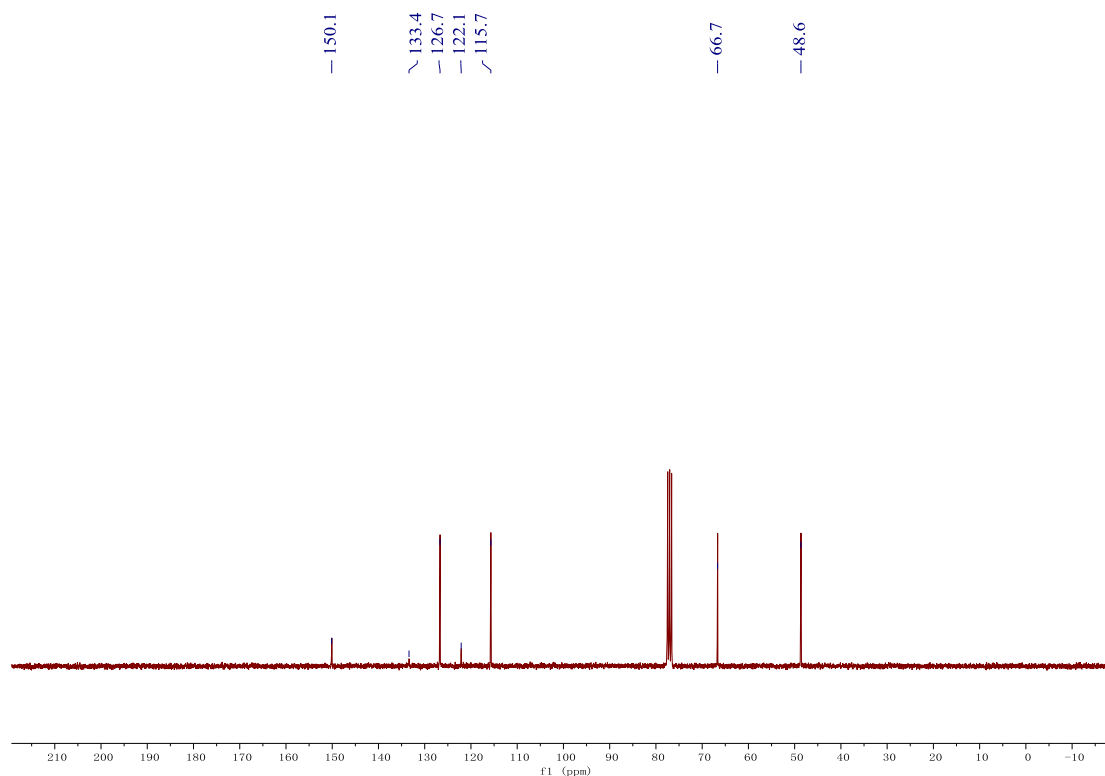

### 2-isothiocyanato-9H-fluorene (**1q**)

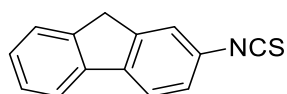

The compound **1q** was obtained as a yellow solid in 50% yield using 9H-fluorene-2-amine following the general procedure A after column chromatography on silica gel with pentane/ethyl acetate (20/1).

$^1\text{H}$  NMR (300 MHz, Chloroform-*d*)  $\delta$  7.67 – 7.67 (m, 2H), 7.45 (d,  $J$  = 7.2 Hz, 1H), 7.35 – 7.20 (m, 3H), 7.17 – 7.11 (m, 1H), 3.78 (s, 2H).

$^{13}\text{C}\{^1\text{H}\}$  NMR (75 MHz, Chloroform-*d*)  $\delta$  144.5, 143.4, 141.0, 140.4, 134.8, 129.2, 127.3, 127.1, 125.1, 124.6, 122.5, 120.5, 120.2, 36.8.

Characterization data matched that reported in the literature<sup>2</sup>

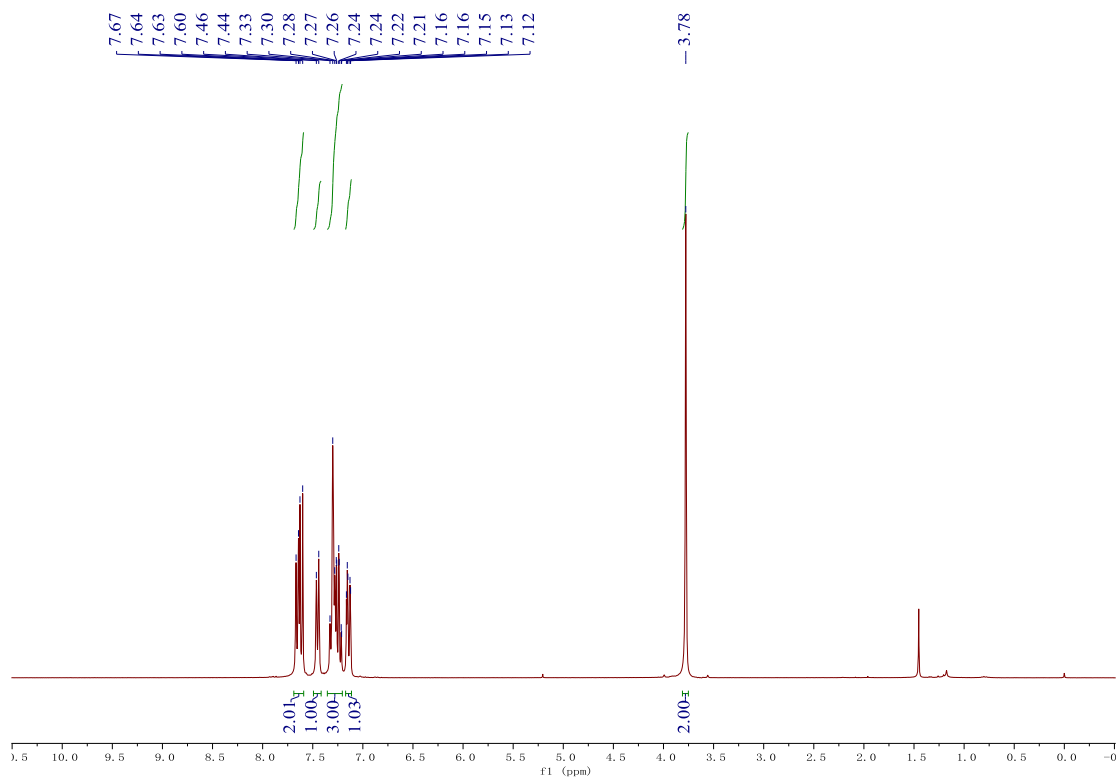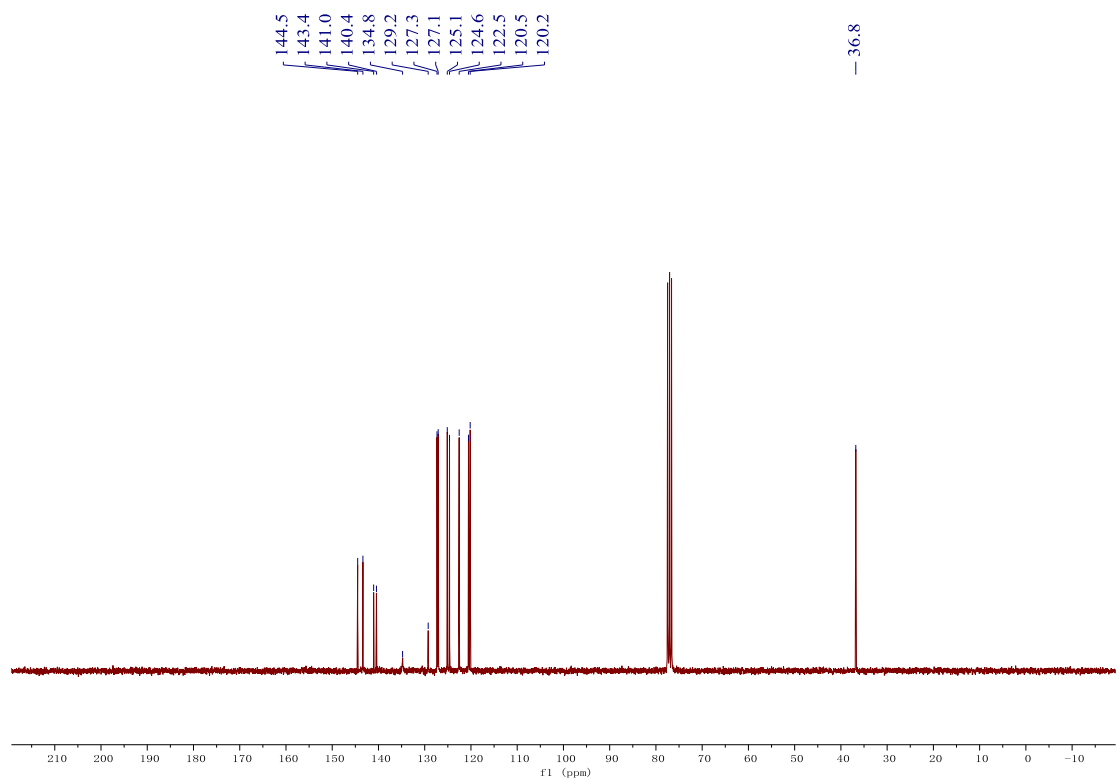

**4-isothiocyanato-1,1'-biphenyl (1r)**

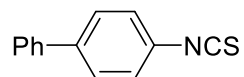

The compound **1r** was obtained as a white solid in 75% yield using 4-(benzyloxy)aniline following



the general procedure A after column chromatography on silica gel with pentane.

$^1\text{H}$  NMR (300 MHz, Chloroform-*d*)  $\delta$  7.61 – 7.54 (m, 4H), 7.49 – 7.42 (m, 2H), 7.41 – 7.34 (m, 1H), 7.33 – 7.27 (m, 2H).

$^{13}\text{C}\{^1\text{H}\}$  NMR (75 MHz, Chloroform-*d*)  $\delta$  140.3, 139.7, 130.3, 128.9, 128.2, 127.9, 127.0, 126.1.

Characterization data matched that reported in the literature<sup>6</sup>

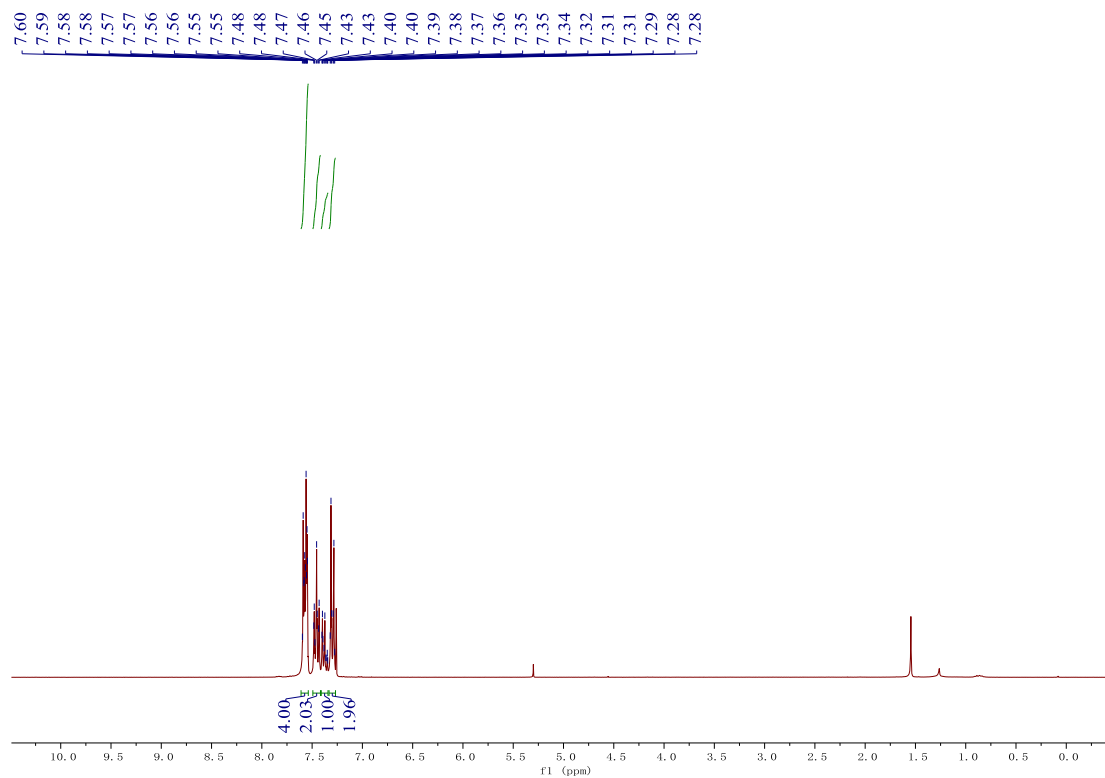

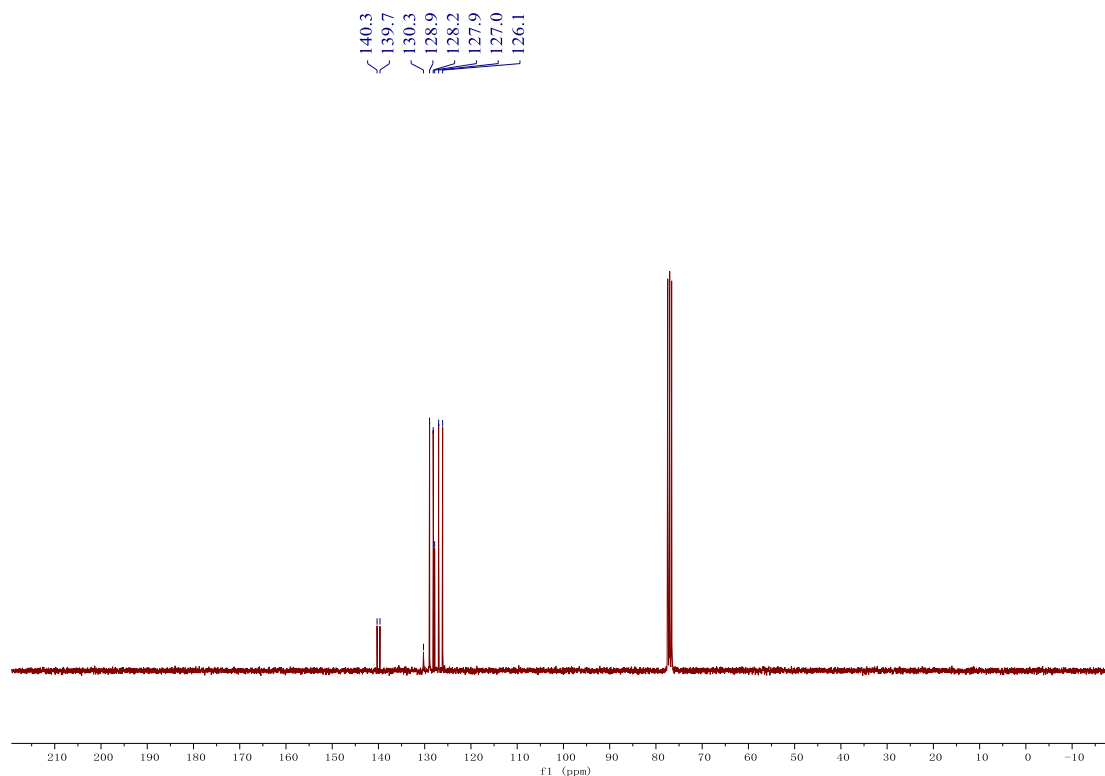

#### 4-isothiocyanatophenyl acetate (**1x**)

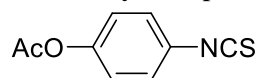

4-Isothiocyanatophenol was obtained as a yellowish oil in 80% yield using 4-aminophenol following the general procedure A after column chromatography on silica gel with cyclohexane/ethyl acetate (20/1).

The compound **1x** was obtained as a yellow solid in 81% yield following literature's procedure<sup>10</sup>: Acetic anhydride (0.95 mL, 2.0 equiv.), DIPEA (1.23 mL, 1.4 equiv.), and DMAP (61.1 mg, 0.1 equiv.) were added to a solution of the 4-isothiocyanatophenol (755 mg, 1.0 equiv.) in Acetonitrile (5 mL). The mixture was stirred at room temperature until starting material is consumed. The reaction was poured into water (10 mL), and the mixture was stirred vigorously for 30 min. The aqueous phase was extracted with ethyl acetate (3×10 mL). The combined organic layers were washed with 1 M aq. HCl (10 mL), saturated aq. NaHCO<sub>3</sub> (10 mL), water (10 mL) and brine (10 mL), and dried over anhydrous Na<sub>2</sub>SO<sub>4</sub>. The solvent was evaporated under reduced and vacuum to give the compound **1x** without further purification.

<sup>1</sup>H NMR (300 MHz, Chloroform-*d*) δ 7.22 – 7.12 (m, 2H), 7.09 – 6.98 (m, 2H), 2.22 (s, 3H).

<sup>13</sup>C{<sup>1</sup>H} NMR (75 MHz, Chloroform-*d*) δ 169.0, 149.3, 136.0, 128.8, 126.7, 122.9, 21.1.

Characterization data matched that reported in the literature<sup>2</sup>

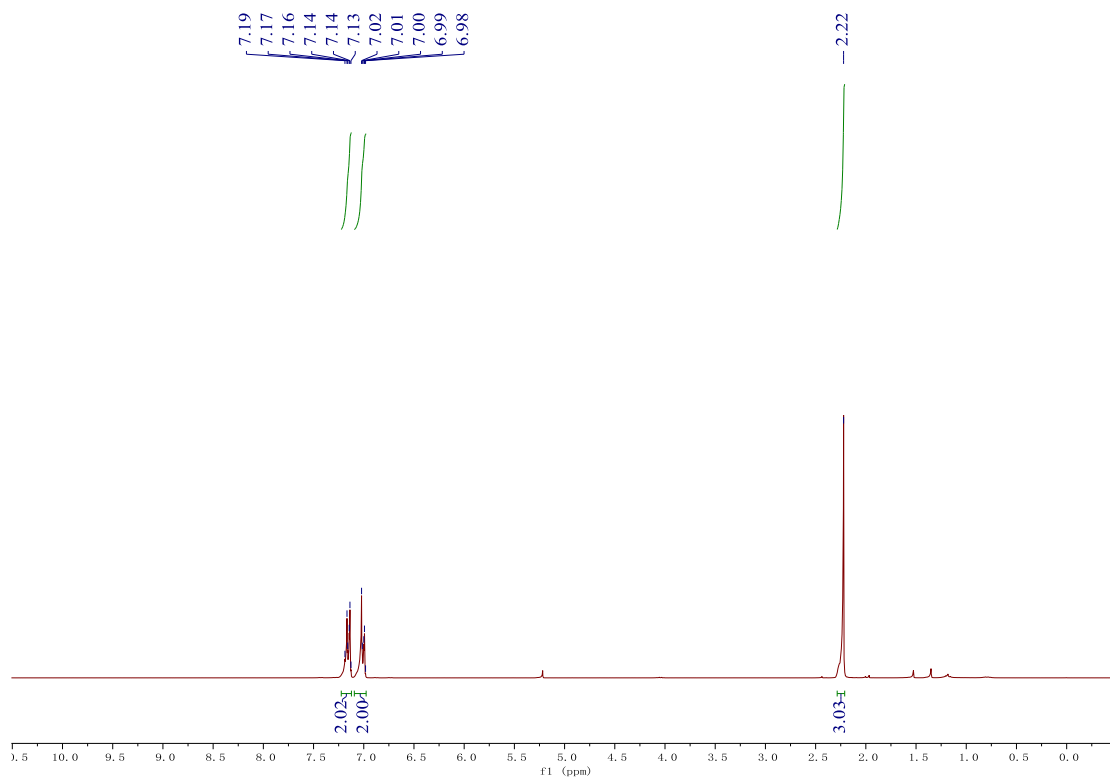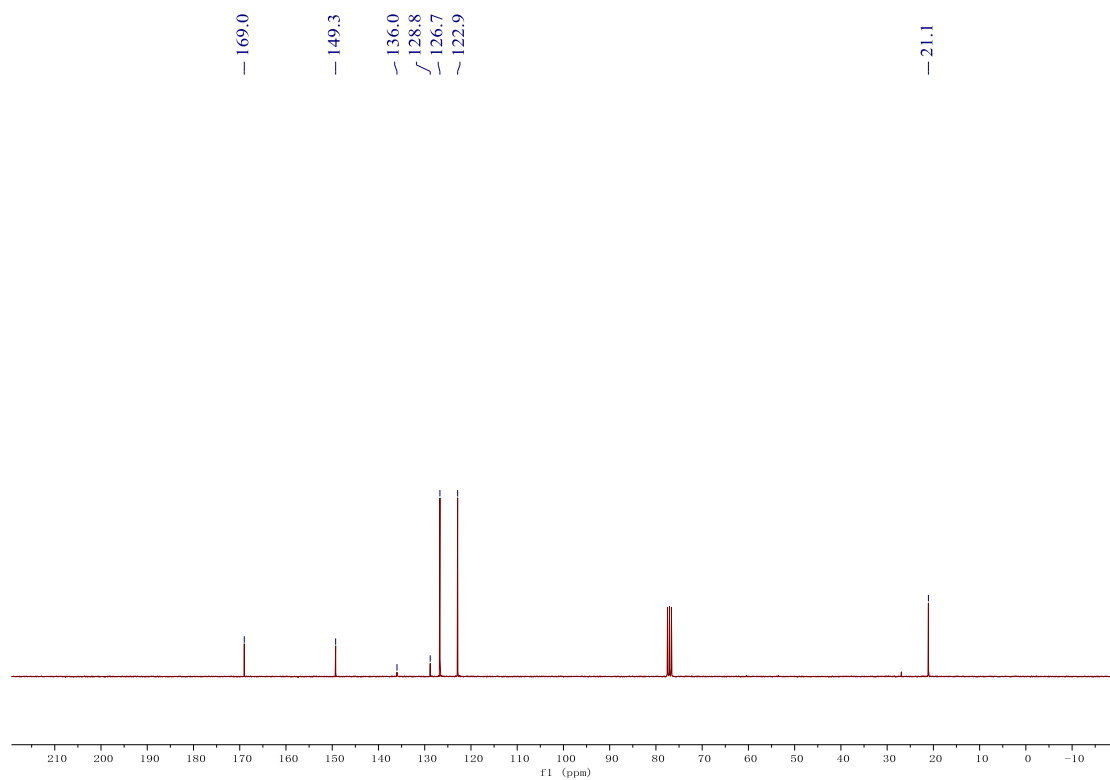

**1-fluoro-4-(4-isothiocyanatophenoxy)benzene (1ab)**

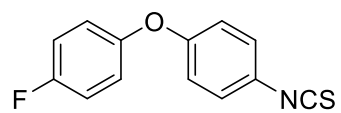

The compound **1ab** was obtained as a colorless oil in 89% yield using 4-(4-fluorophenoxy)aniline following the general procedure A after column chromatography on silica gel with pentane.

$^1\text{H}$  NMR (300 MHz, Chloroform-*d*)  $\delta$  7.12 – 7.07 (m, 2H), 7.00 – 6.88 (m, 4H), 6.87 – 6.79 (m, 2H).

$^{19}\text{F}$  NMR (282 MHz, Chloroform-*d*)  $\delta$  -118.6 – -118.7 (m).

$^{13}\text{C}\{^1\text{H}\}$  NMR (75 MHz, Chloroform-*d*)  $\delta$  159.3 (d,  $J = 242.9$  Hz), 156.9, 151.9 (d,  $J = 2.7$  Hz), 135.0, 127.2, 125.8, 121.1 (d,  $J = 8.3$  Hz), 118.7, 116.6 (d,  $J = 23.4$  Hz).

HRMS (EI) calculated for  $\text{C}_{13}\text{H}_8\text{FNOS}$ : 245.0305  $[\text{M}]^+$ , Found: 245.0307.

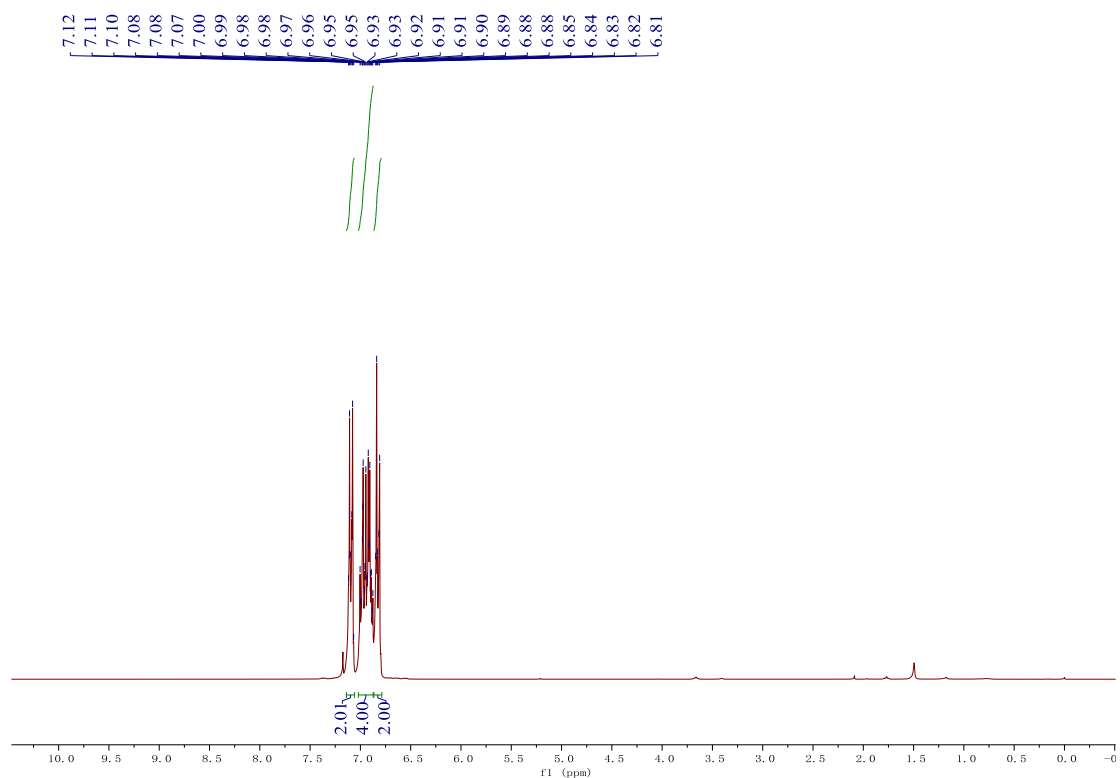

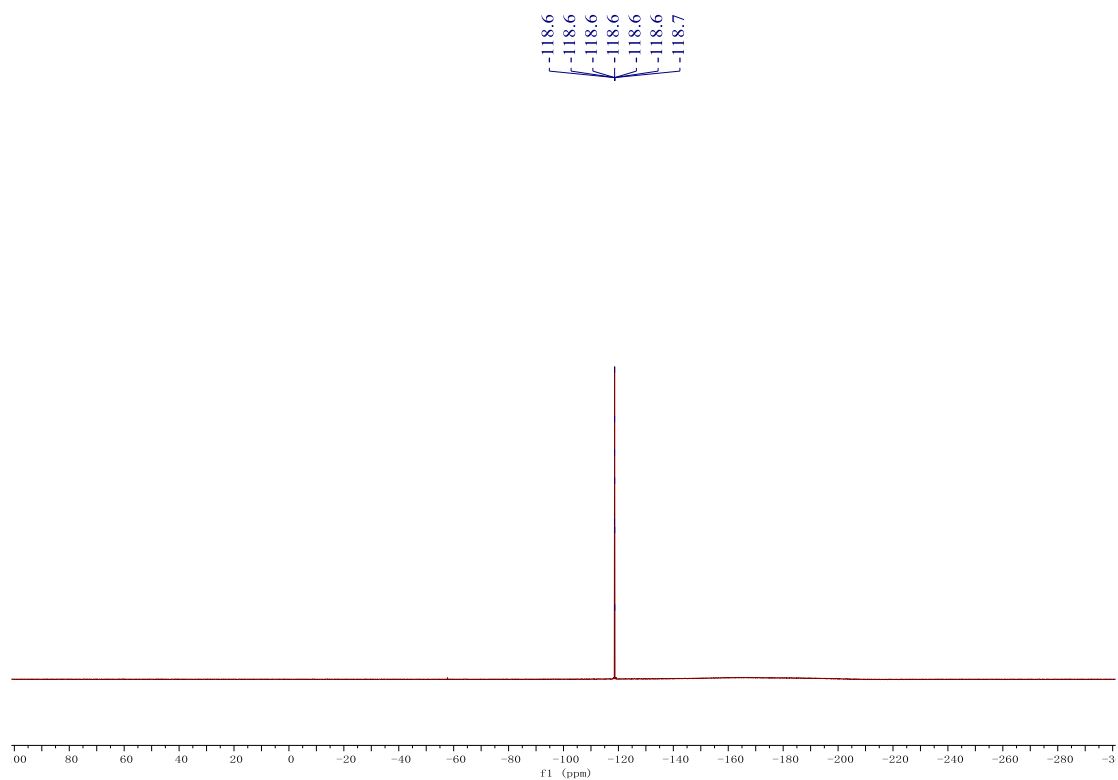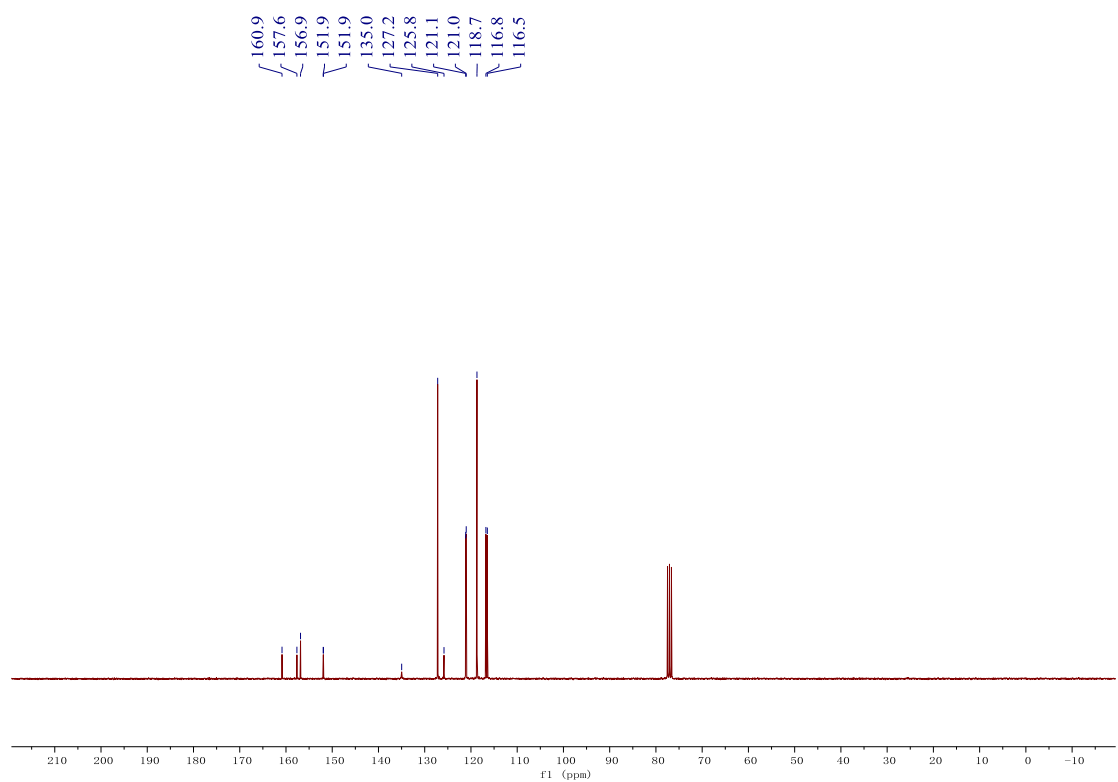

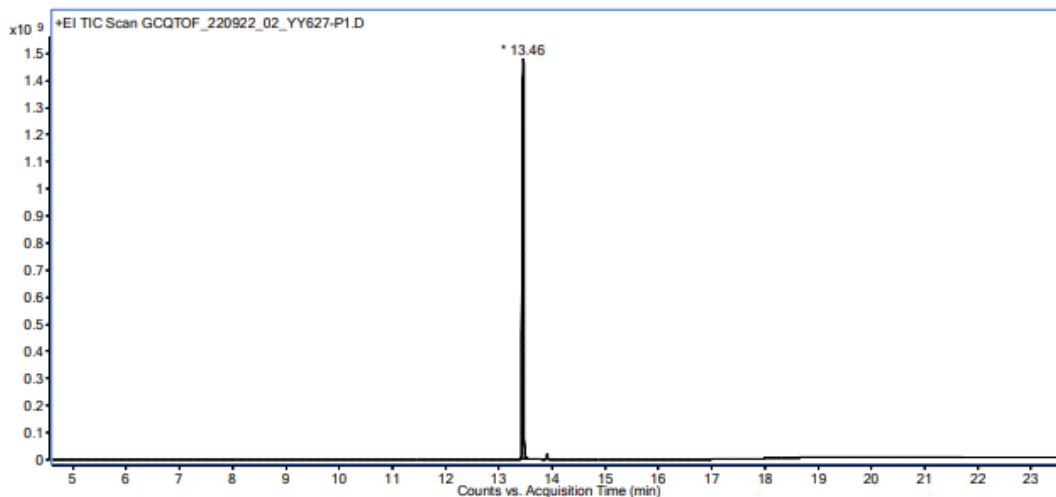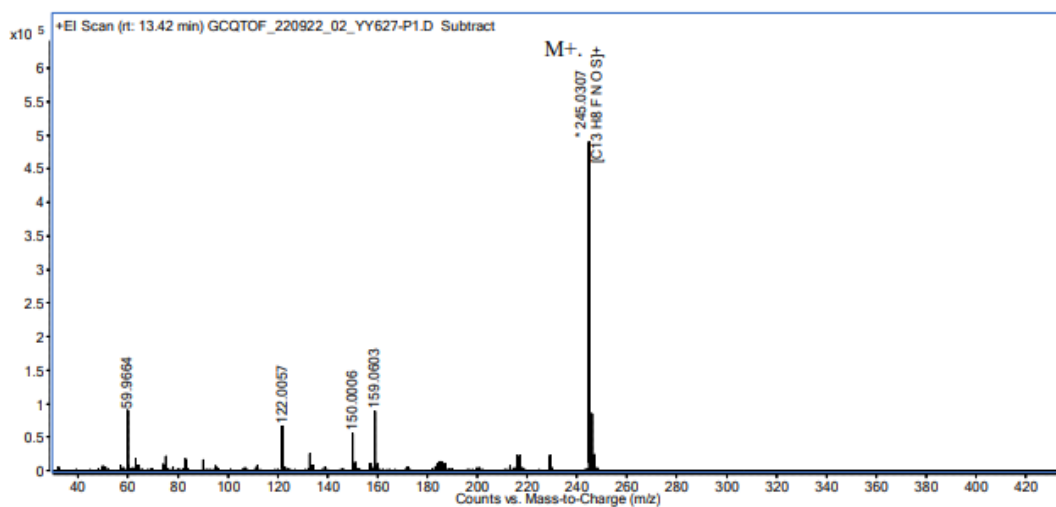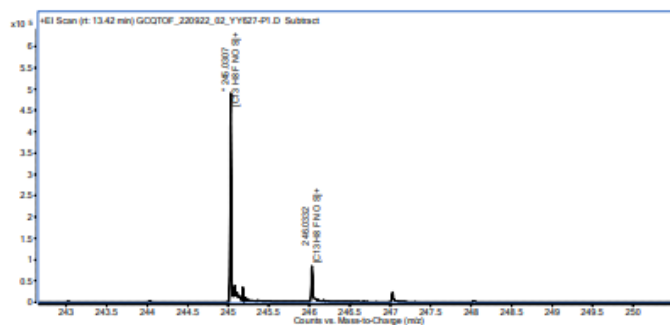

| m/z      | Formula (M)                                     | m/z (Calc) | Diff (ppm) |                  |
|----------|-------------------------------------------------|------------|------------|------------------|
| 245.0307 | C <sub>13</sub> H <sub>8</sub> FNO <sub>5</sub> | 245.0305   | 0.8        | [M] <sup>+</sup> |

### 1-chloro-4-(4-isothiocyanatophenoxy)benzene (**1ac**)

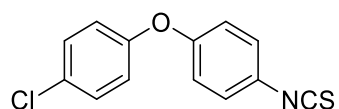

The compound **1ac** was obtained as a colorless oil in 80% yield using 4-(4-chlorophenoxy)aniline following the general procedure C after column chromatography on silica gel with pentane.

<sup>1</sup>H NMR (300 MHz, Chloroform-*d*) δ 7.49 – 7.42 (m, 2H), 7.23 – 7.17 (m, 2H), 6.97 – 6.92 (m, 2H),

6.92 – 6.86 (m, 2H).

$^{13}\text{C}\{^1\text{H}\}$  NMR (75 MHz, Chloroform-*d*)  $\delta$  156.1, 154.9, 135.2, 130.0, 129.2, 127.3, 126.3, 120.6, 119.4.

HRMS (EI) calculated for  $\text{C}_{13}\text{H}_8\text{ClNOS}$ : 261.0010  $[\text{M}]^+$ , Found: 261.0012.

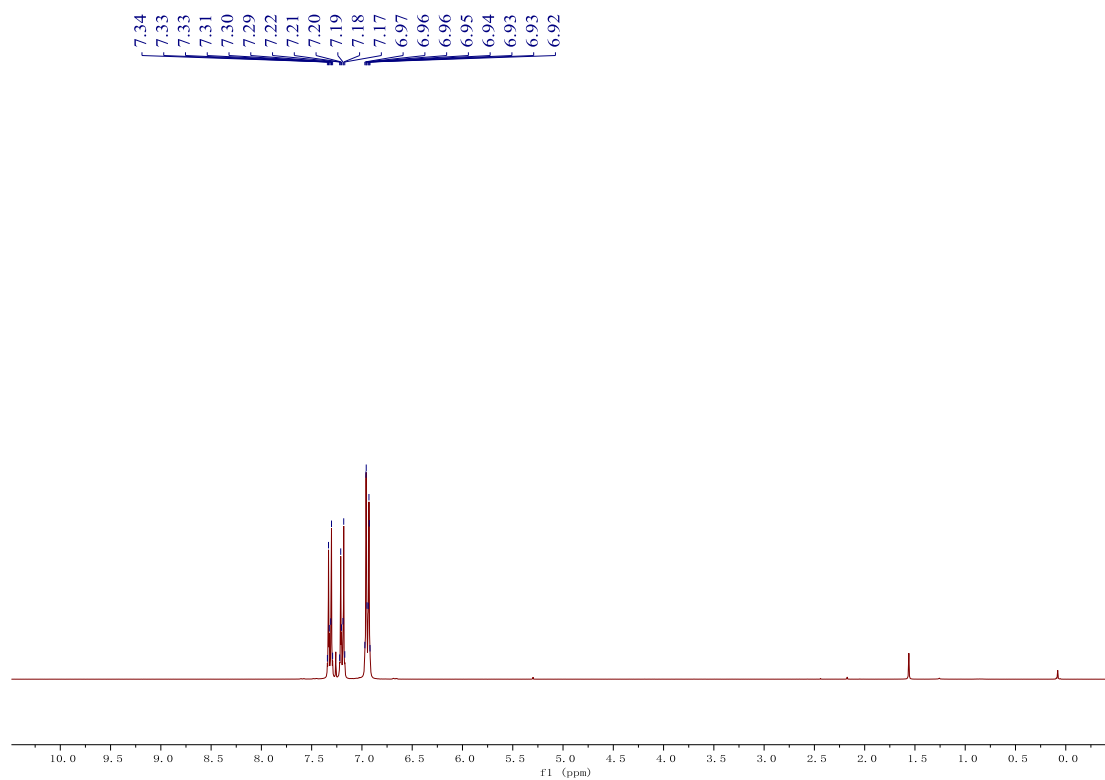

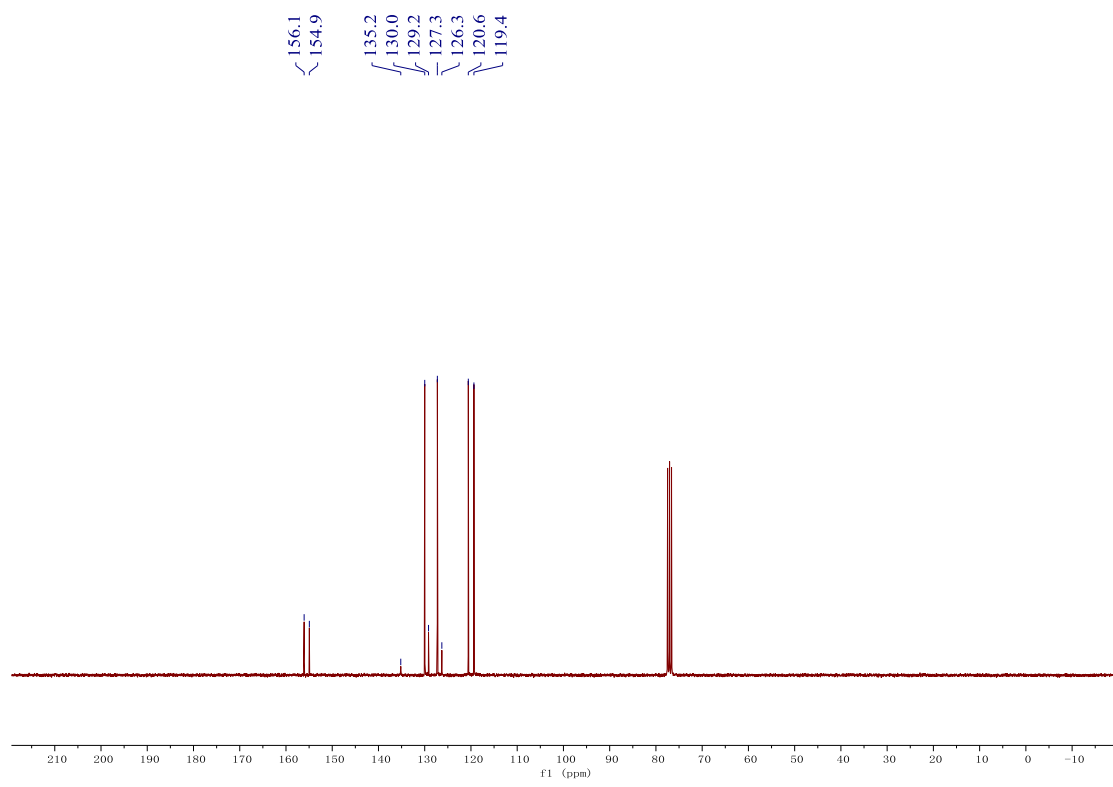



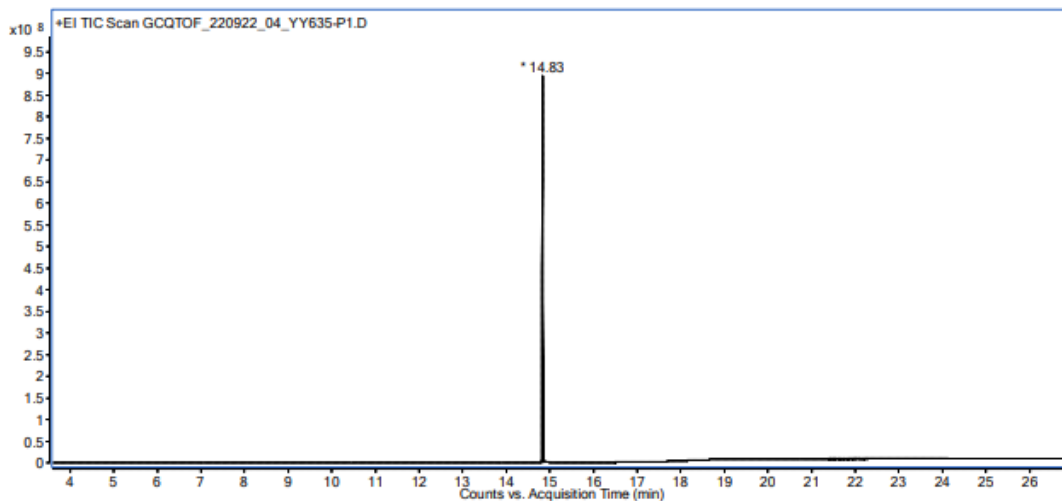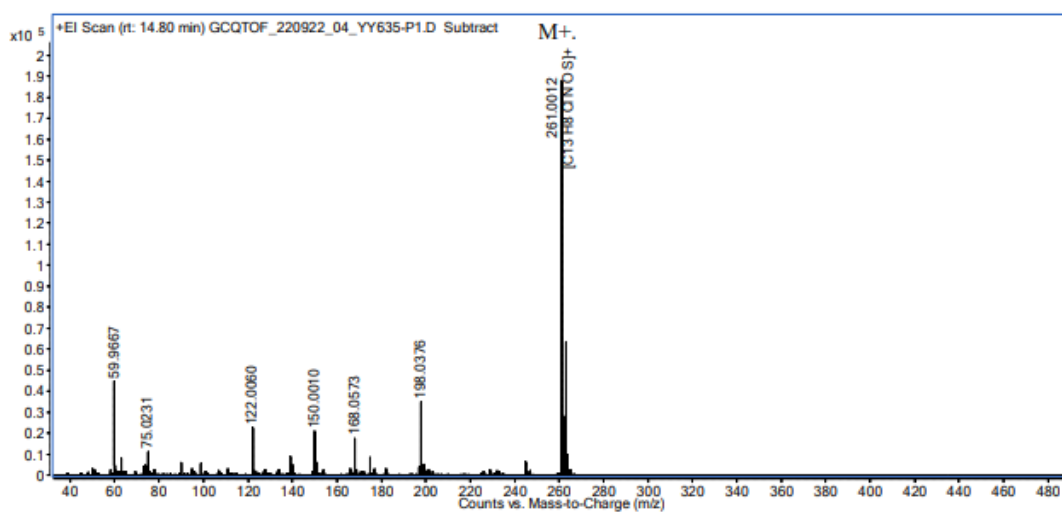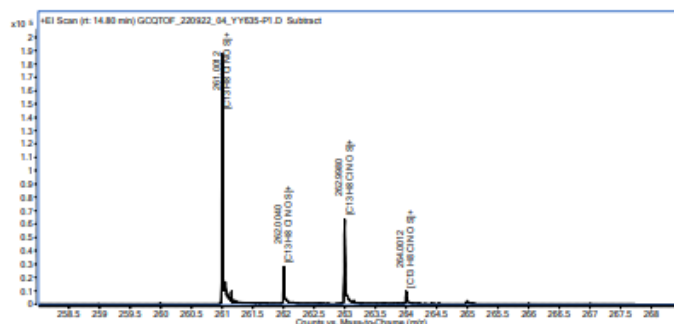

| m/z      | Formula (M)                          | m/z (Calc) | Diff (ppm) |                  |
|----------|--------------------------------------|------------|------------|------------------|
| 261.0012 | C <sub>13</sub> H <sub>8</sub> CINOS | 261.0010   | 0.8        | [M] <sup>+</sup> |

### 1-bromo-4-(4-isothiocyanatophenoxy)benzene (**1ad**)

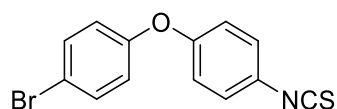

The compound **1ad** was obtained as a colorless oil in 95% yield using 4-(4-bromophenoxy)aniline following the general procedure C after column chromatography on silica gel with pentane.

<sup>1</sup>H NMR (300 MHz, Chloroform-*d*) δ 7.38 – 7.26 (m, 1H), 7.25 – 7.14 (m, 1H), 7.00 – 6.89 (m, 3H).

$^{13}\text{C}\{^1\text{H}\}$  NMR (75 MHz, Chloroform-*d*)  $\delta$  156.1, 154.9, 130.0, 129.2, 127.3, 126.3, 120.8, 119.4.

HRMS (EI) calculated for  $\text{C}_{13}\text{H}_8\text{BrNOS}$ : 304.9504  $[\text{M}]^+$ , Found: 304.9502.

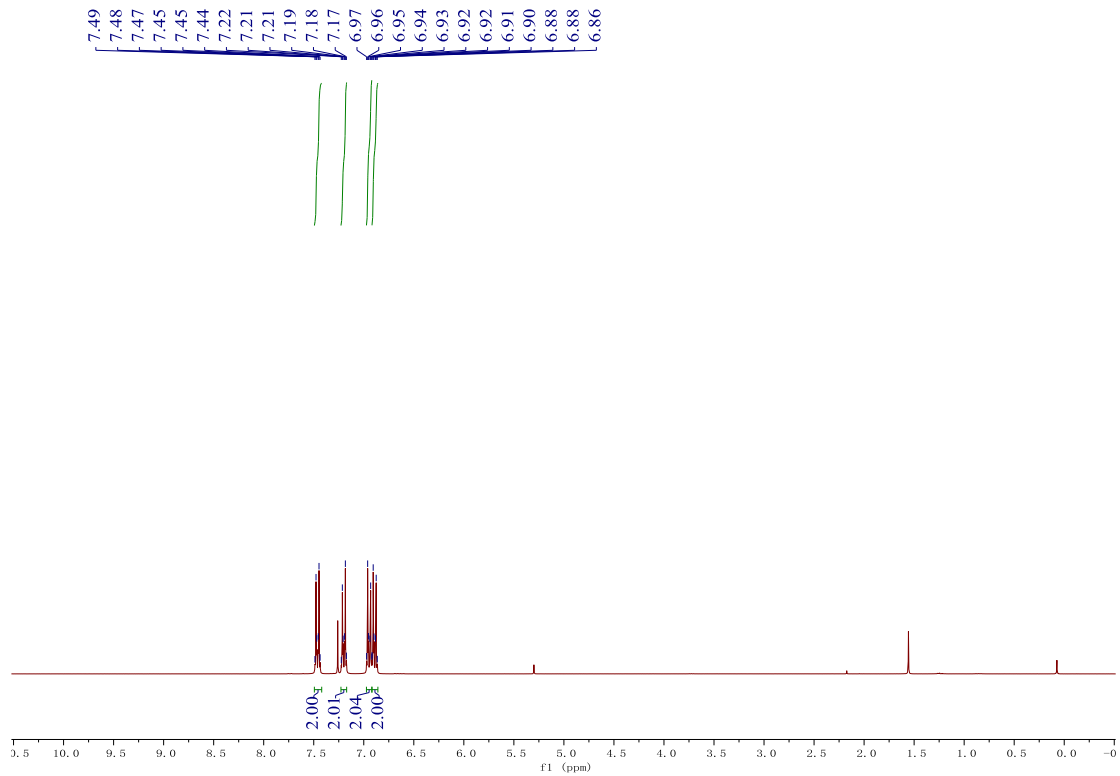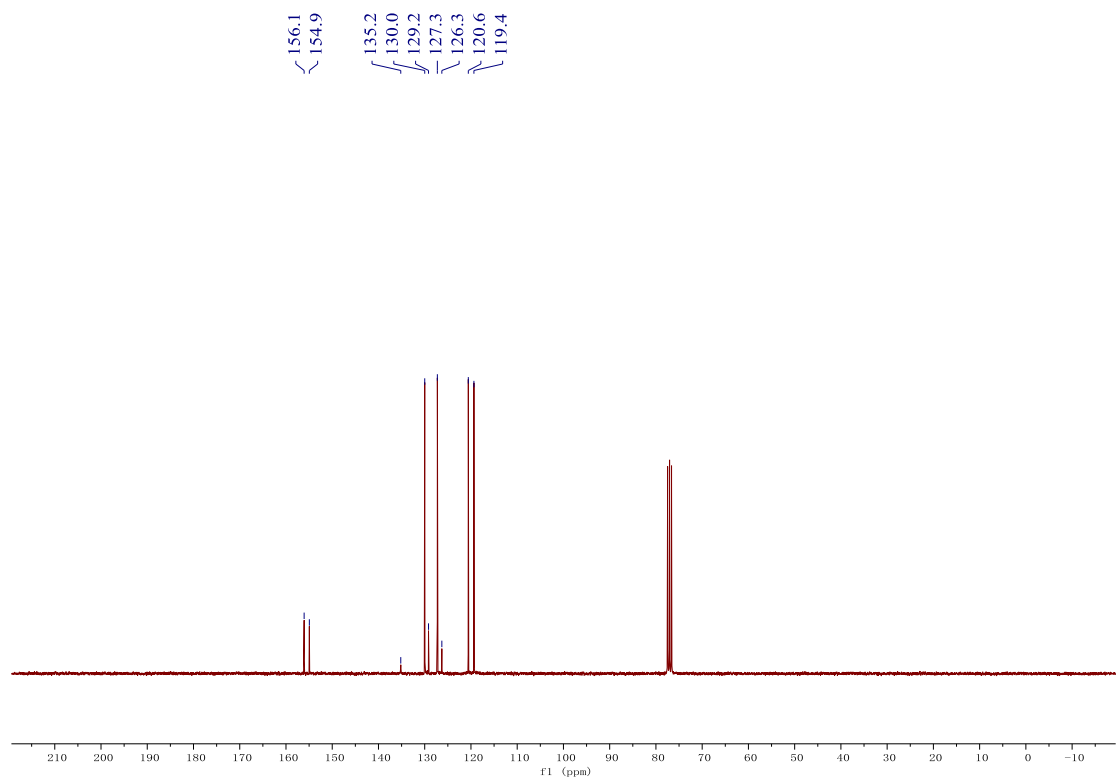

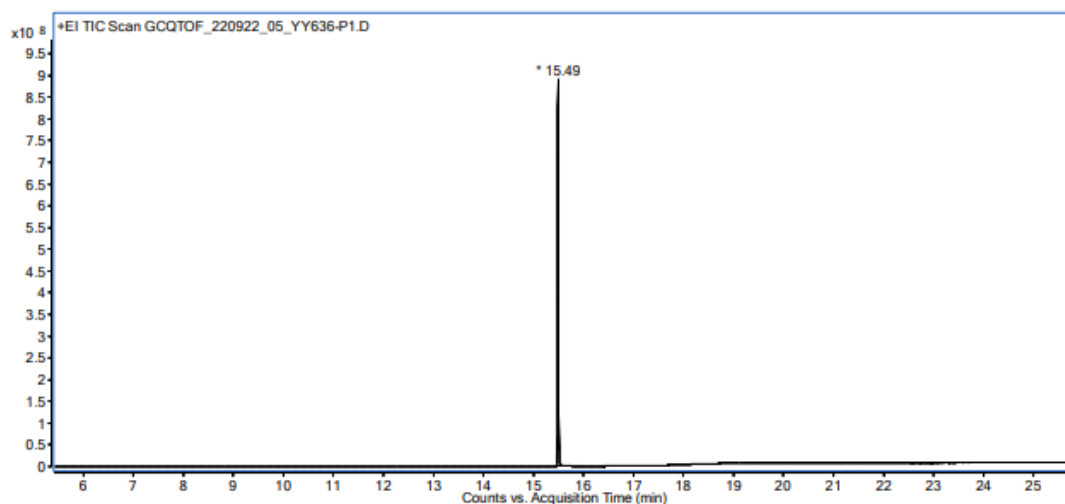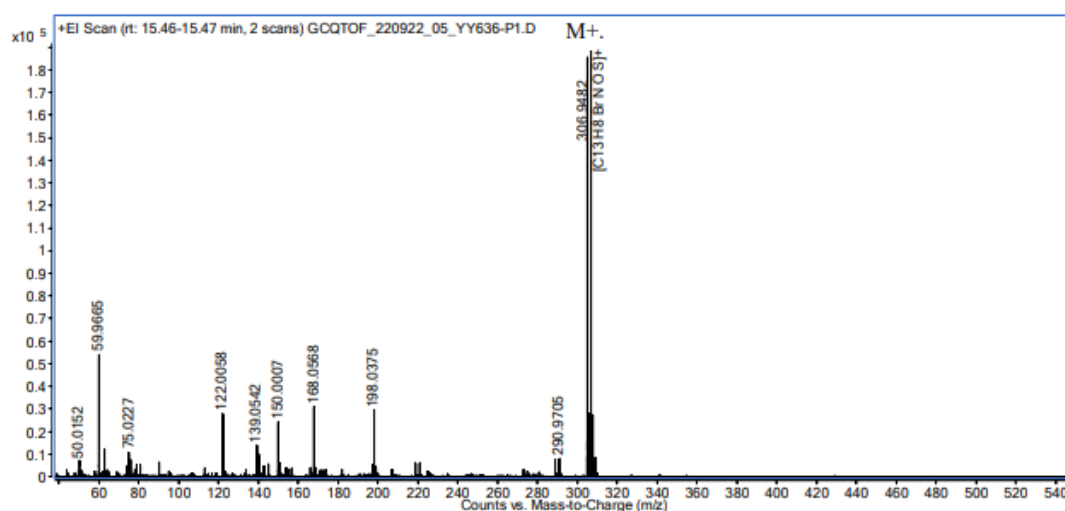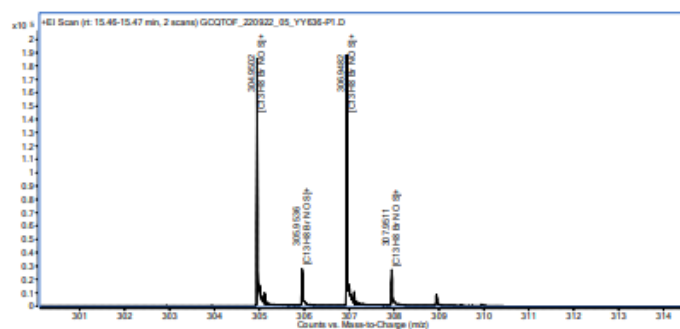

| m/z      | Formula (M) | m/z (Calc) | Diff (ppm) |                  |
|----------|-------------|------------|------------|------------------|
| 304.9502 | C13H8BrNOS  | 304.9504   | -0.7       | [M] <sup>+</sup> |

benzyl (2S,5R,6R)-6-isothiocyanato-3,3-dimethyl-7-oxo-4-thia-1-azabicyclo[3.2.0]heptane-2-carboxylate (**1af**)

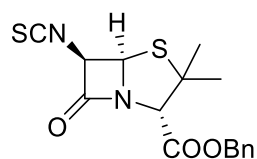

The compound **1af** was obtained as a yellow solid in 95% yield using (2S,5R,6R)-2-((benzyloxy)carbonyl)-3,3-dimethyl-7-oxo-4-thia-1-azabicyclo[3.2.0]heptan-6-aminium

trifluoromethanesulfonate following the general procedure B without further purification.

$^1\text{H}$  NMR (300 MHz, Chloroform-*d*)  $\delta$  7.36 – 7.25 (m, 5H), 5.93 (d,  $J = 3.3$  Hz, 1H), 5.20 – 5.08 (m, 3H), 4.47 (d,  $J = 3.4$  Hz, 1H), 1.52 (s, 3H), 1.36 (s, 3H).

$^{13}\text{C}\{^1\text{H}\}$  NMR (75 MHz, Chloroform-*d*)  $\delta$  168.3, 168.2, 134.8, 128.7, 128.7, 128.6, 72.2, 70.0, 67.4, 62.8, 62.8, 33.1, 26.4.

Characterization data matched that reported in the literature<sup>2</sup>

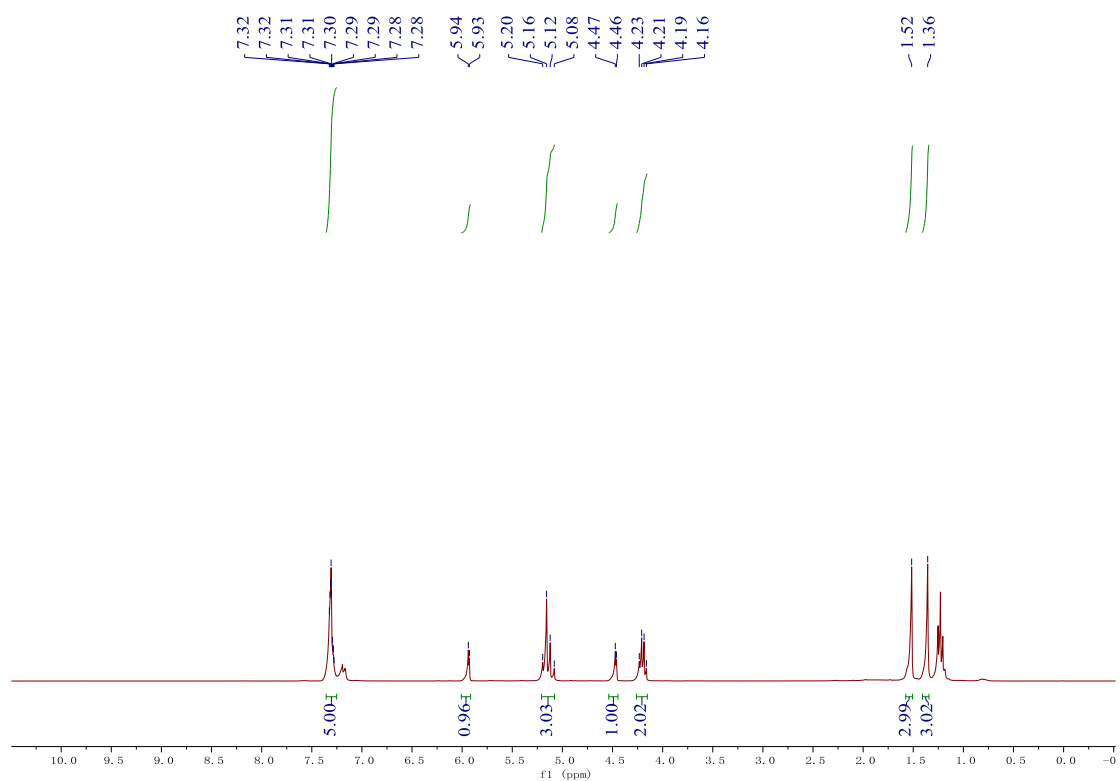

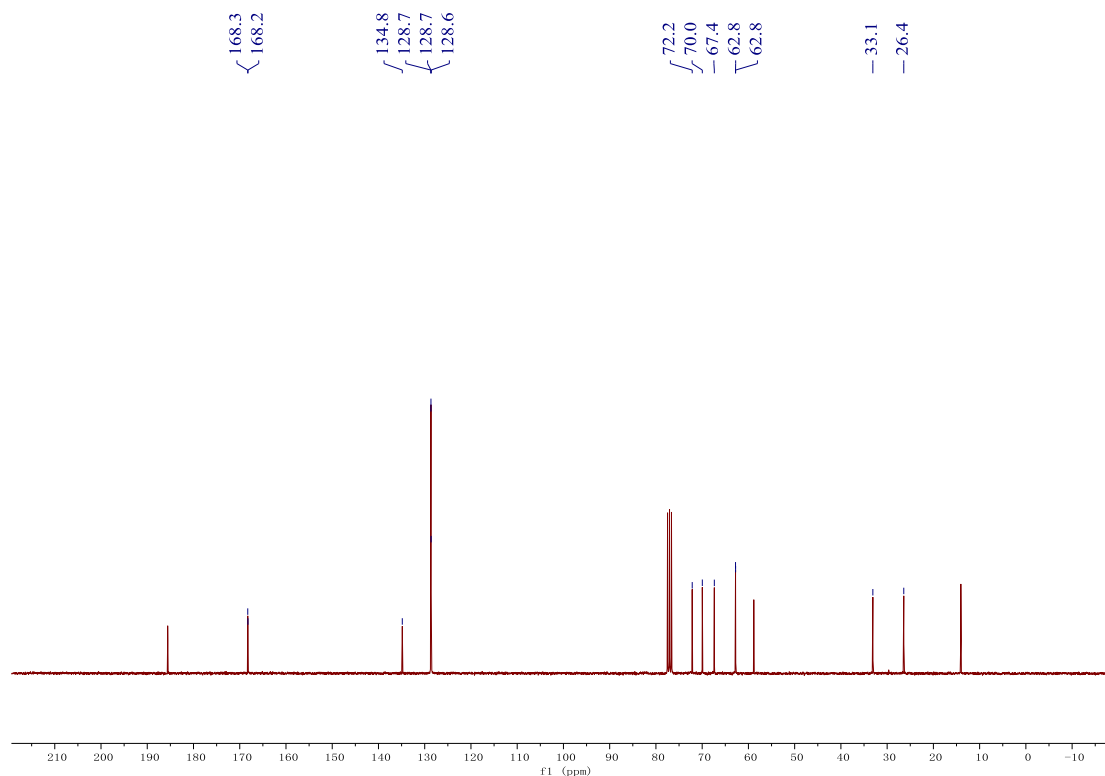

**(1R,2S,5R)-2-isopropyl-5-methylcyclohexyl 4-isothiocyanatobenzoate (1ag)**

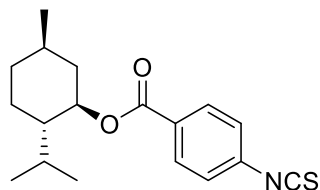

(1R,2S,5R)-2-isopropyl-5-methylcyclohexyl 4-aminobenzoate was obtained as a white solid in 99% yield using 4-aminobenzoyl chloride and (1R,2S,5R)-2-isopropyl-5-methylcyclohexan-1-ol following the general procedure D.

The compound **1ag** was obtained as a white solid in 35% yield using (1R,2S,5R)-2-isopropyl-5-methylcyclohexyl 4-aminobenzoate following the general procedure C after column chromatography on silica gel with pentane.

$^1\text{H}$  NMR (300 MHz, Chloroform-*d*)  $\delta$  8.05 – 8.03 (m, 1H), 8.02 – 8.00 (m, 1H), 7.28 – 7.27 (m, 1H), 7.26 – 7.24 (m, 1H), 4.97 – 4.88 (m, 1H), 2.15 – 2.07 (m, 1H), 1.97 – 1.87 (m, 1H), 1.78 – 1.69 (m, 2H), 1.59 – 1.49 (m, 3H), 1.09 (q,  $J$  = 11.8 Hz, 2H), 0.93 (d,  $J$  = 3.9 Hz, 3H), 0.91 (d,  $J$  = 4.4 Hz, 3H), 0.79 (d,  $J$  = 6.9 Hz, 3H).

$^{13}\text{C}$  { $^1\text{H}$ } NMR (75 MHz, Chloroform-*d*)  $\delta$  164.9, 137.6, 135.4, 131.0, 129.4, 125.6, 75.4, 47.2, 40.9, 34.3, 31.4, 26.6, 23.6, 22.0, 20.7, 16.5.

HRMS (ESI) calculated for  $\text{C}_{18}\text{H}_{24}\text{NO}_2\text{S}$ : 318.1522  $[\text{M}+\text{H}]^+$ , Found: 318.1526.

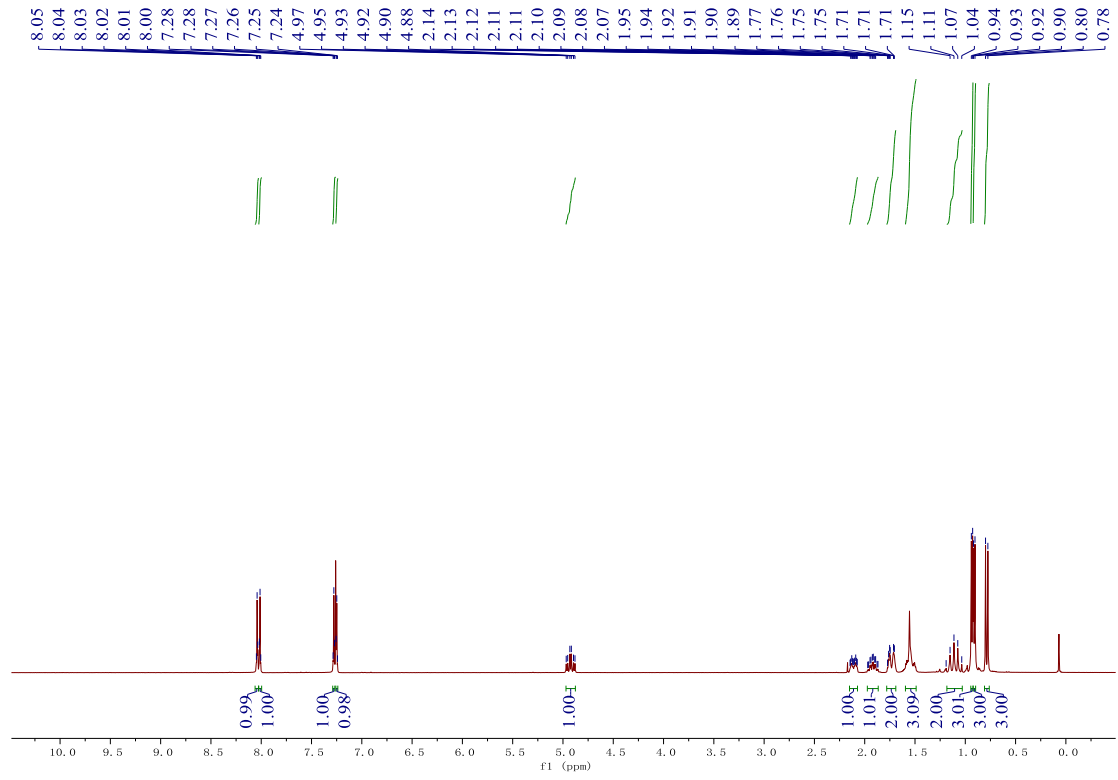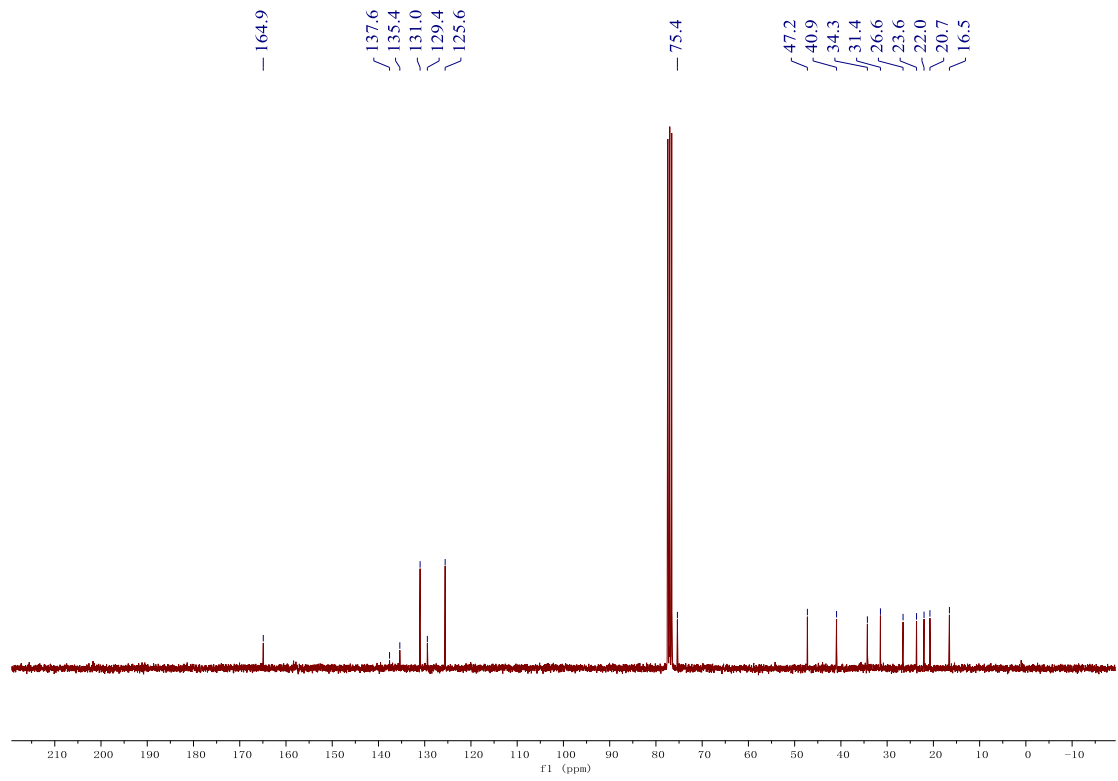

CENTRE COMMUN DE SPECTROMETRIE DE MASSE

Analysis Info

Analysis Name Impact2\_220912\_01\_YY617-P1.d  
 Method Tune\_pos\_Standard.m  
 Comment

Acquisition Date 9/12/2022 10:29:27 AM  
 Instrument / Ser# impact II 1825265.1  
 0081

Acquisition Parameter

|             |          |                       |            |                  |           |
|-------------|----------|-----------------------|------------|------------------|-----------|
| Source Type | ESI      | Ion Polarity          | Positive   | Set Nebulizer    | 0.3 Bar   |
| Focus       | Active   | Set Capillary         | 1500 V     | Set Dry Heater   | 200 °C    |
| Scan Begin  | 50 m/z   | Set End Plate Offset  | -500 V     | Set Dry Gas      | 4.0 l/min |
| Scan End    | 1000 m/z | Set Collision Cell RF | 1500.0 Vpp | Set Divert Valve | Source    |

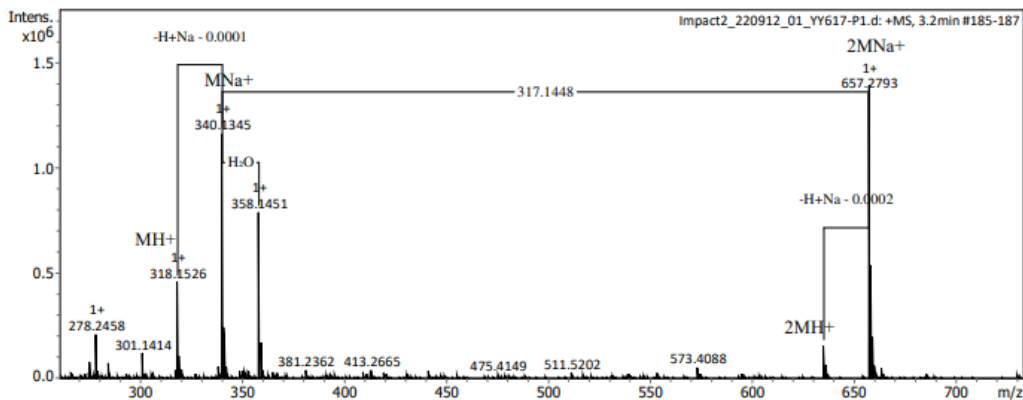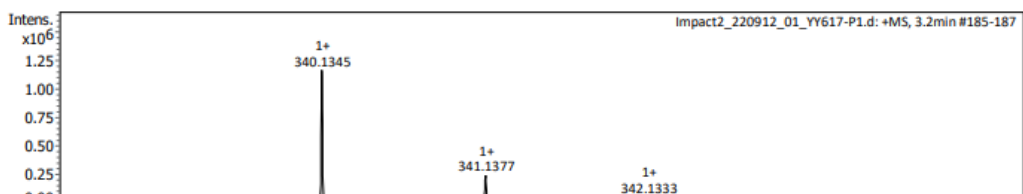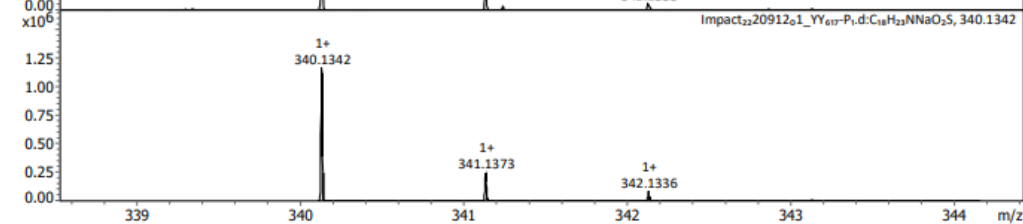

| Meas. m/z | Ion Formula    | m/z      | Sum Formula | err [ppm] | mSigma | Adduct | z  |
|-----------|----------------|----------|-------------|-----------|--------|--------|----|
| 318.1526  | C18H24NO2S     | 318.1522 | C18H23NO2S  | -1.2      | 15.4   | M+H    | 1+ |
| 340.1345  | C18H23NNaO2S   | 340.1342 |             | -0.9      | 12.3   | M+Na   | 1+ |
| 635.2976  | C36H47N2O4S2   | 635.2972 |             | -0.6      | 12.9   | 2M+H   | 1+ |
| 657.2793  | C36H46N2NaO4S2 | 657.2791 |             | -0.3      | 19.9   | 2M+Na  | 1+ |

**((3aS,5aR,8aR,8bS)-2,2,7,7-tetramethyltetrahydro-3aH-bis([1,3]dioxolo)[4,5-b:4',5'-d]pyran-3a-yl)methyl 4-isothiocyanatobenzoate (1ah)**

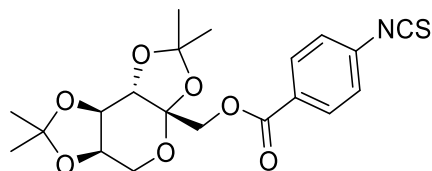

((3aS,5aR,8aR,8bS)-2,2,7,7-tetramethyltetrahydro-3aH-bis([1,3]dioxolo)[4,5-b:4',5'-d]pyran-3a-yl)methyl 4-aminobenzoate was obtained as a white solid in 99% yield using 4-aminobenzoyl chloride and ((3aS,5aR,8aR,8bS)-2,2,7,7-tetramethyltetrahydro-3aH-bis([1,3]dioxolo)[4,5-b:4',5'-d]pyran-3a-yl)methanol following the general procedure D.

The compound **1ah** was obtained as a colorless oil in 48% yield using ((3aS,5aR,8aR,8bS)-2,2,7,7-tetramethyltetrahydro-3aH-bis([1,3]dioxolo)[4,5-b:4',5'-d]pyran-3a-yl)methyl 4-aminobenzoate following the general procedure C after column chromatography on silica gel with pentane/ethyl acetate (9/1).

$^1\text{H}$  NMR (300 MHz, Chloroform-*d*)  $\delta$  8.01 – 7.93 (m, 2H), 7.21 – 7.16 (m, 2H), 5.49 (d,  $J = 4.9$  Hz, 1H), 4.60 – 4.57 (m, 1H), 4.48 – 4.43 (m, 1H), 4.39 – 4.32 (m, 1H), 4.29 – 4.27 (m, 1H), 4.26 – 4.22 (m, 1H), 4.12 – 4.07 (m, 1H), 1.42 (d,  $J = 10.3$  Hz, 6H), 1.27 (d,  $J = 5.9$  Hz, 6H).

$^{13}\text{C}\{^1\text{H}\}$  NMR (75 MHz, Chloroform-*d*)  $\delta$  165.2, 137.8, 135.7, 131.7, 128.6, 125.7, 109.7, 108.8, 96.3, 71.1, 70.7, 70.5, 66.1, 64.3, 26.0, 26.0, 25.0, 24.5.

HRMS (EI) calculated for  $\text{C}_{20}\text{H}_{24}\text{NO}_7\text{S}$ : 422.1276  $[\text{M}+\text{H}]^+$ , Found: 422.1268.

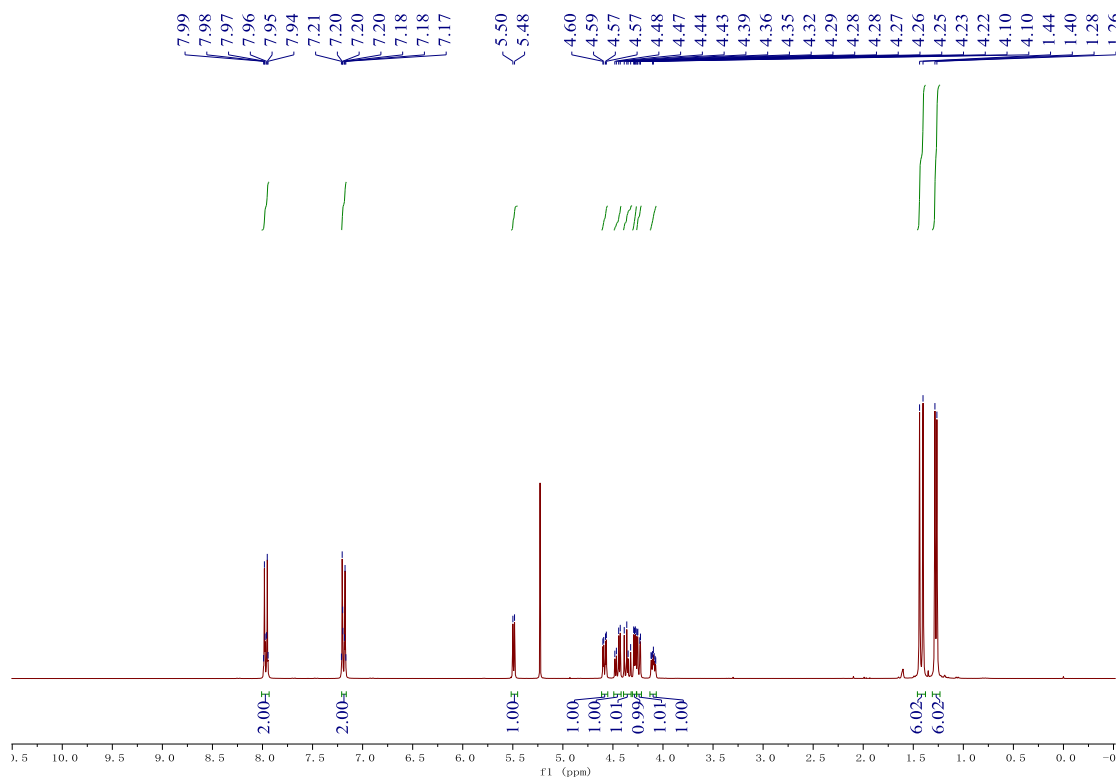



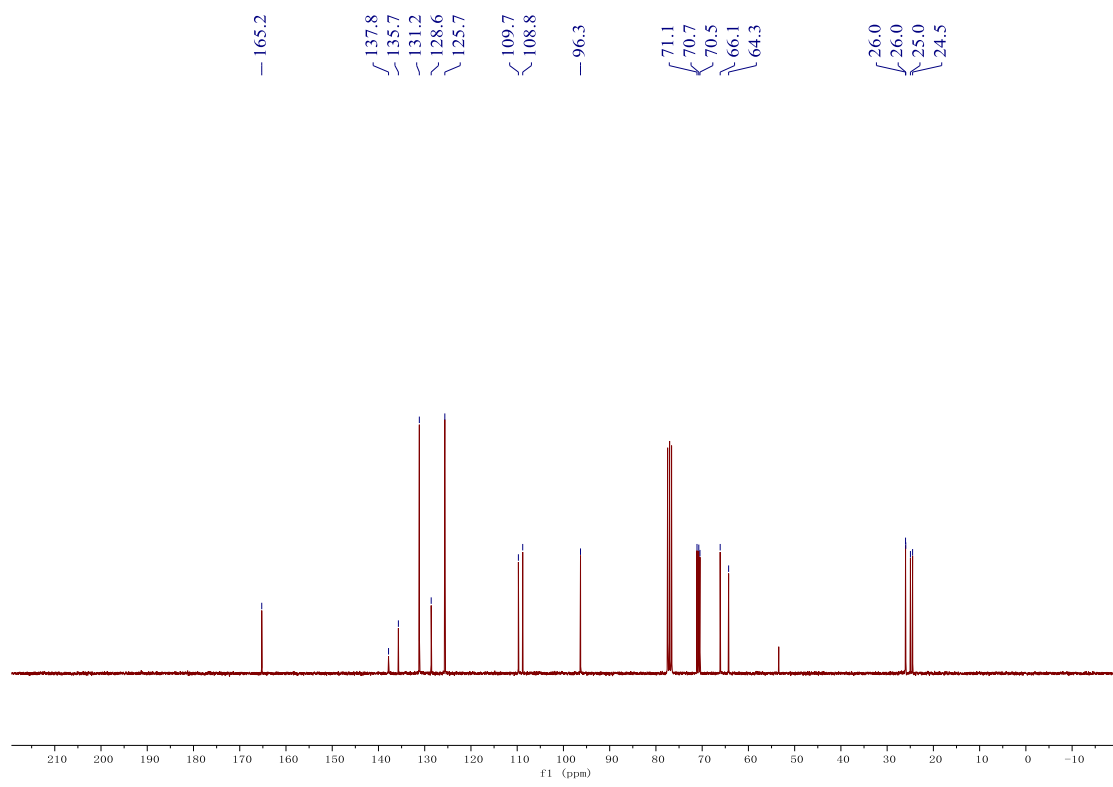

CENTRE COMMUN DE SPECTROMETRIE DE MASSE

**Analysis Info**

Analysis Name Impact2\_220929\_02\_YY643-P1.d  
 Method Tune\_pos\_Standard.m  
 Comment  
 Acquisition Date 9/29/2022 5:11:51 PM  
 Instrument / Ser# impact II 1825265.1  
 0081

**Acquisition Parameter**

|             |          |                       |           |                  |           |
|-------------|----------|-----------------------|-----------|------------------|-----------|
| Source Type | ESI      | Ion Polarity          | Positive  | Set Nebulizer    | 0.3 Bar   |
| Focus       | Active   | Set Capillary         | 1500 V    | Set Dry Heater   | 200 °C    |
| Scan Begin  | 50 m/z   | Set End Plate Offset  | -500 V    | Set Dry Gas      | 4.0 l/min |
| Scan End    | 1000 m/z | Set Collision Cell RF | 750.0 Vpp | Set Divert Valve | Source    |

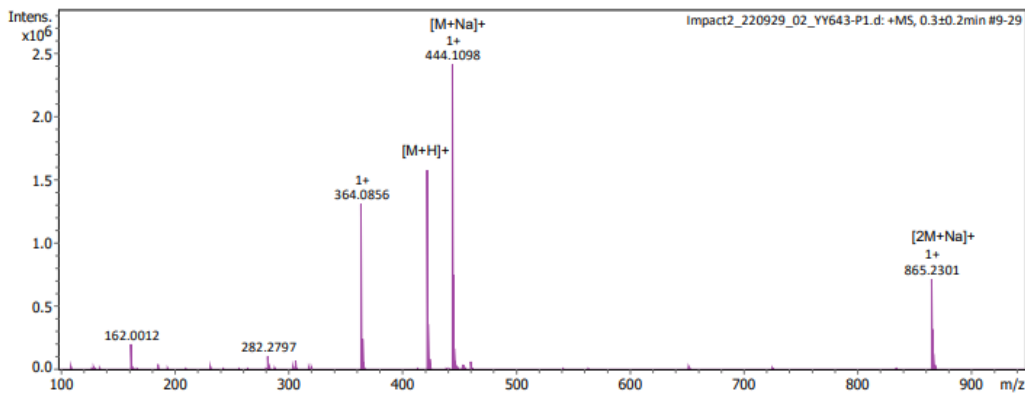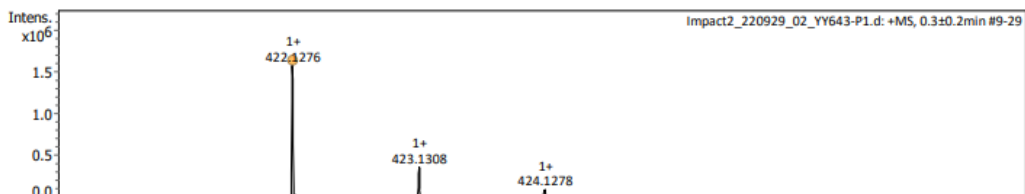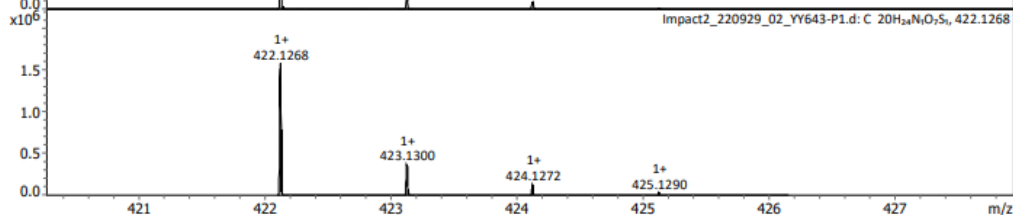

| Meas. m/z | Ion Formula     | m/z      | Sum Formula | err [ppm] | mSigma | Adduct | z  |
|-----------|-----------------|----------|-------------|-----------|--------|--------|----|
| 422.1276  | C20H24NO7S      | 422.1268 | C20H23NO7S  | -2.0      | 16.1   | M+H    | 1+ |
| 444.1098  | C20H23NNaO7S    | 444.1087 |             | -2.3      | 39.8   | M+Na   | 1+ |
| 865.2301  | C40H46N2NaO14S2 | 865.2283 |             | -2.1      | 25.0   | 2M+Na  | 1+ |

**(R)-2,5,7,8-tetramethyl-2-((4R,8R)-4,8,12-trimethyltridecyl)chroman-6-yl isothiocyanatobenzoate (1ai)**

4-

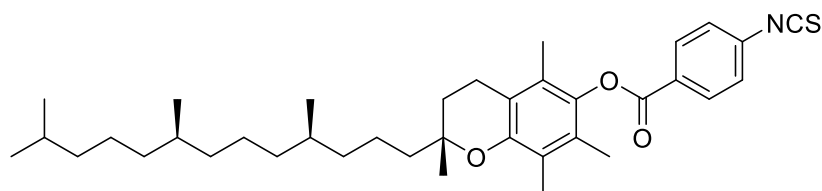

(R)-2,5,7,8-tetramethyl-2-((4R,8R)-4,8,12-trimethyltridecyl)chroman-6-yl 4-aminobenzoate was obtained as a white solid in 99% yield using 4-aminobenzoyl chloride and (R)-2,5,7,8-tetramethyl-2-((4R,8R)-4,8,12-trimethyltridecyl)chroman-6-ol following the general procedure D.

The compound **1ai** was obtained as a yellow oil in 56% yield using (R)-2,5,7,8-tetramethyl-2-((4R,8R)-4,8,12-trimethyltridecyl)chroman-6-yl 4-aminobenzoate following the general procedure

C after column chromatography on silica gel with pentane/ethyl acetate (50/1).

$^1\text{H}$  NMR (300 MHz, Chloroform-*d*)  $\delta$  8.16 (d,  $J = 8.5$  Hz, 2H), 7.27 (d,  $J = 8.6$  Hz, 2H), 2.54 (t,  $J = 6.8$  Hz, 2H), 2.04 (s, 3H), 1.97 (s, 3H), 1.92 (s, 3H), 1.81 – 1.69 (m, 2H), 1.55 – 1.44 (m, 3H), 1.40 – 1.30 (m, 4H), 1.27 – 1.13 (m, 11H), 1.10 – 0.98 (m, 6H), 0.80 – 0.76 (m, 12H).

$^{13}\text{C}\{^1\text{H}\}$  NMR (75 MHz, Chloroform-*d*)  $\delta$  164.04, 149.61, 140.46, 138.11, 136.15, 131.62, 128.14, 126.75, 125.87, 125.00, 123.24, 117.55, 75.15, 39.39, 37.58, 37.48, 37.41, 37.31, 32.80, 32.72, 31.02, 28.00, 24.84, 24.47, 22.75, 22.65, 21.06, 20.65, 19.78, 19.71, 19.63, 13.08, 12.23, 11.89.

HRMS (EI) calculated for  $\text{C}_{37}\text{H}_{54}\text{NO}_3\text{S}$ : 592.3819  $[\text{M}+\text{H}]^+$ , Found: 592.3823.

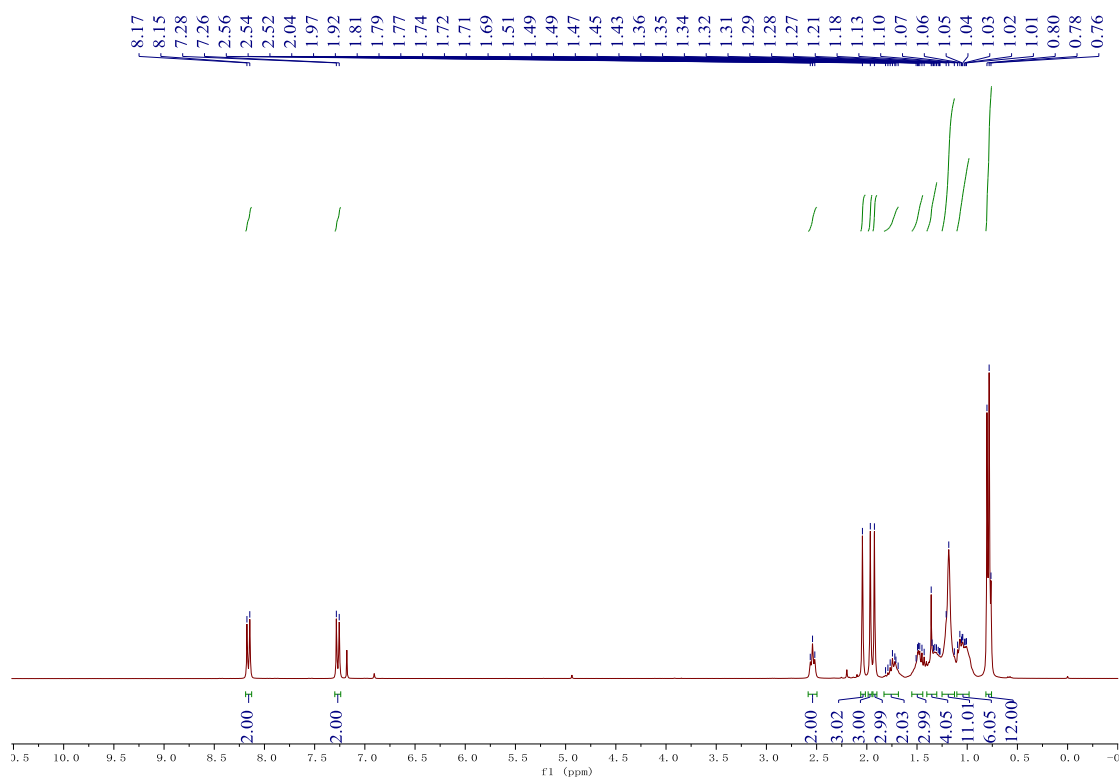

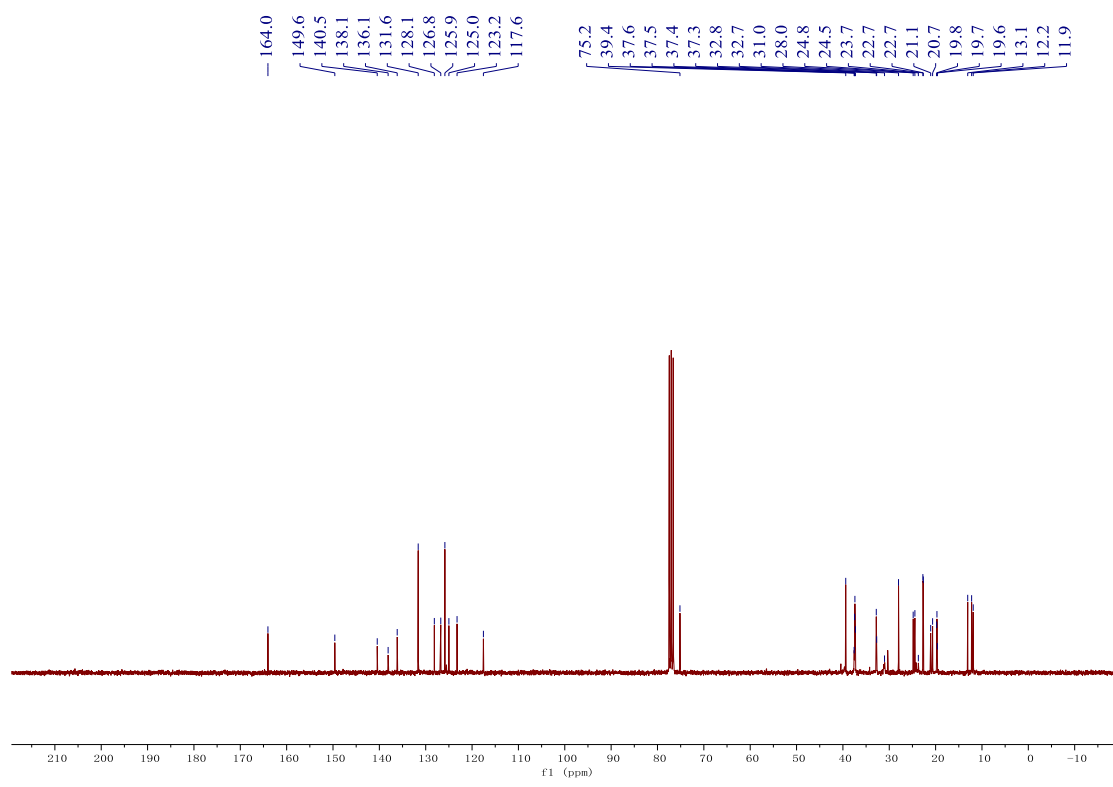

**CENTRE COMMUN DE SPECTROMETRIE DE MASSE**

**Analysis Info**

|               |                              |                   |                      |
|---------------|------------------------------|-------------------|----------------------|
| Analysis Name | Impact2_220929_04_YY647-P1.d | Acquisition Date  | 9/29/2022 5:25:06 PM |
| Method        | Tune_pos_Standard.m          | Instrument / Ser# | impact II 1825265.1  |
| Comment       |                              |                   | 0081                 |

**Acquisition Parameter**

|             |          |                       |            |                  |           |
|-------------|----------|-----------------------|------------|------------------|-----------|
| Source Type | ESI      | Ion Polarity          | Positive   | Set Nebulizer    | 0.3 Bar   |
| Focus       | Active   | Set Capillary         | 1500 V     | Set Dry Heater   | 200 °C    |
| Scan Begin  | 50 m/z   | Set End Plate Offset  | -500 V     | Set Dry Gas      | 4.0 l/min |
| Scan End    | 1000 m/z | Set Collision Cell RF | 1500.0 Vpp | Set Divert Valve | Source    |

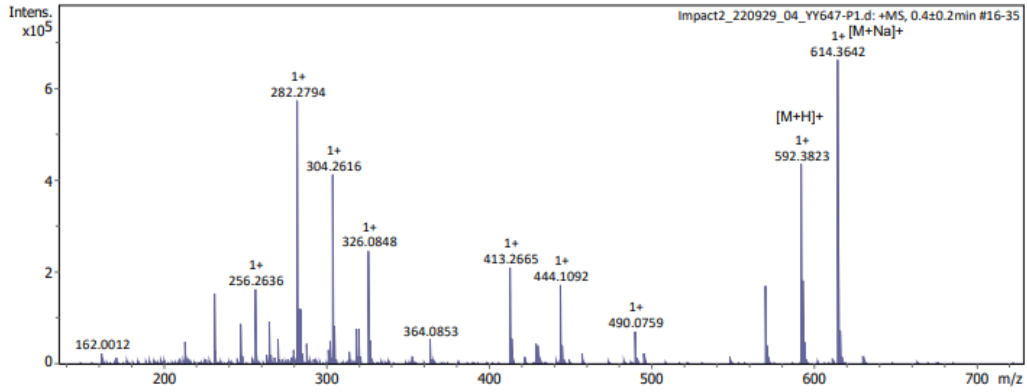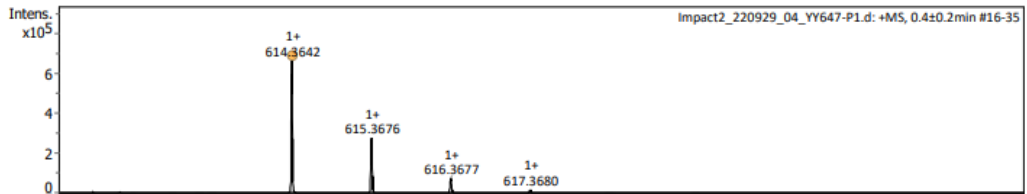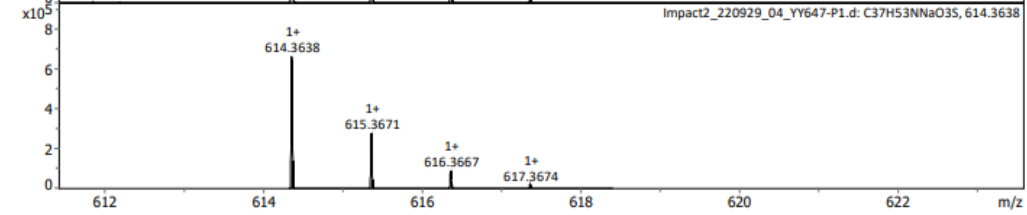

| Meas. m/z | Ion Formula  | m/z      | Sum Formula | err [ppm] | mSigma | Adduct | z  |
|-----------|--------------|----------|-------------|-----------|--------|--------|----|
| 592.3823  | C37H54NO3S   | 592.3819 | C37H53NO3S  | -0.7      | 13.9   | M+H    | 1+ |
| 614.3642  | C37H53NNaO3S | 614.3638 |             | -0.6      | 14.3   | M+Na   | 1+ |

## General procedure for the synthesis of N, S-bis(trifluoromethyl)thiohydroxylamine

### General procedure E for the synthesis of N, S-bis(trifluoromethyl)thiohydroxylamine:

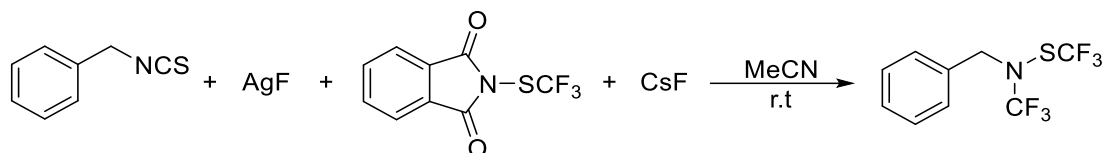

To a 10 mL tube were sequentially added isothiocyanates (0.2 mmol, 1 equiv.), silver fluoride (0.6 mmol, 3.0 equiv.), 2-((trifluoromethyl)thio)isoindoline-1,3-dione (0.2 mmol, 1.0 equiv.), cesium fluoride (0.2 mmol, 1.0 equiv.), and acetonitrile (1 mL). The reaction mixture was stirred at room temperature overnight. After completion, the mixture was filtered through a celite pad, then extracted with ethyl acetate (3×10 mL). The combined organic layers were dried over anhydrous sodium sulfate and concentrated under reduced pressure. The crude material obtained was then purified by column chromatography on silica gel.

### General procedure F for the synthesis of N, S-bis(trifluoromethyl)thiohydroxylamine:

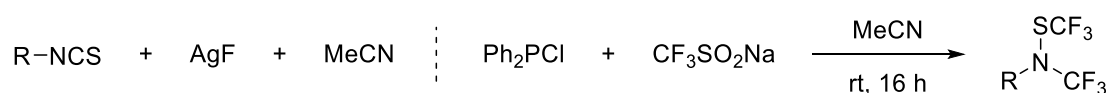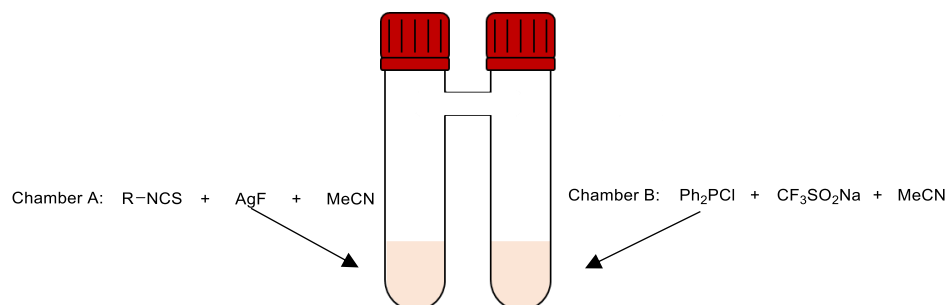

To a H-tube were sequentially added isothiocyanate (0.2 mmol, 1.0 equiv.), silver fluoride (0.8 mmol, 4.0 equiv.), and acetonitrile (1 mL) to chamber A. Then sodium triflate (0.6 mmol, 3.0 equiv.) and acetonitrile (1 mL) were added to chamber B. After sealing the H-tube, chlorodiphenylphosphine (1.2 mmol, 3.0 equiv.) was added to chamber B by syringe. The mixture was stirred at room temperature overnight. After completion, the mixture in chamber A was filtered through a celite pad, then extracted with ethyl acetate (3×10 mL). The combined organic layers were dried over anhydrous sodium sulfate and concentrated under reduced pressure. The crude material obtained was then purified by column chromatography on silica gel.

### General procedure G for the synthesis of N, S-bis(trifluoromethyl)thiohydroxylamine in large scale (2 g scale):

To a 400 mL H-tube were sequentially added isothiocyanate (10.0 mmol, 1.0 equiv.), silver fluoride (40.0 mmol, 4.0 equiv.), and acetonitrile (50 mL) to chamber A. Then sodium triflate (30.0 mmol, 3.0 equiv.) and acetonitrile (50 mL) was added to chamber B. After sealing the H-tube,

chlorodiphenylphosphine (60.0 mmol, 6.0 equiv.) was slowly added to chamber B slowly syringe. The mixture was stirred at room temperature for 24 hours. The reaction process was monitored by  $^{19}\text{F}$ -NMR. After completion, the mixture in chamber A was filtered through a celite pad, then extracted with ethyl acetate (3×30 mL). The combined organic layers were dried over anhydrous sodium sulfate and concentrated under reduced pressure. The crude material obtained was then purified by column chromatography on silica gel.

**General procedure H for the synthesis of N, S-bis(trifluoromethyl)thiohydroxylamine in large scale (4 g scale):**

To a 400 mL H-tube were sequentially added isothiocyanate (20.0 mmol, 1.0 equiv.), silver fluoride (80.0 mmol, 4.0 equiv.), and acetonitrile (100 mL) to chamber A. Then sodium triflate (60.0 mmol, 3.0 equiv.) and acetonitrile (100 mL) was added to chamber B. After sealing the H-tube, chlorodiphenylphosphine (120.0 mmol, 6.0 equiv.) was slowly added to chamber B slowly syringe at 0 °C (ice bath). The mixture was then stirred at room temperature for 24 hours. The reaction process was monitored by  $^{19}\text{F}$ -NMR. After completion, the mixture in chamber A was filtered through a celite pad, then extracted with ethyl acetate (3×30 mL). The combined organic layers were dried over anhydrous sodium sulfate and concentrated under reduced pressure. The crude material obtained was then purified by column chromatography on silica gel.

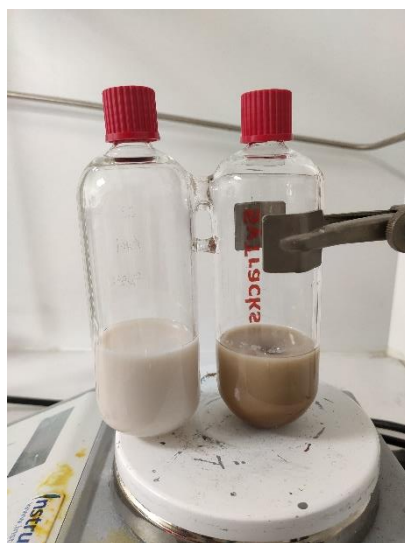

# Characterization of N, S-bis(trifluoromethyl)thiohydroxylamine

## N-([1,1'-biphenyl]-4-ylmethyl)-N,S-bis(trifluoromethyl)thiohydroxylamine (**3b**)

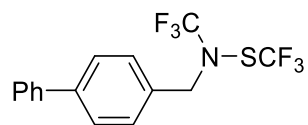

The compound **3b** was obtained as a colorless oil in 57% yield using 4-(isothiocyanatomethyl)-1,1'-biphenyl following the general procedure E after column chromatography on silica gel with pentane.

$^1\text{H}$  NMR (300 MHz, Chloroform-*d*)  $\delta$  7.64 – 7.58 (m, 4H), 7.49 – 7.42 (m, 2H), 7.41 – 7.34 (m, 3H), 4.69 (d,  $J = 14.3$  Hz, 1H), 4.43 (d,  $J = 14.3$  Hz, 1H).

$^{19}\text{F}$  NMR (282 MHz, Chloroform-*d*)  $\delta$  -50.5 (q,  $J = 3.4$  Hz), -58.3 (q,  $J = 3.4$  Hz).

$^{13}\text{C}\{^1\text{H}\}$  NMR (75 MHz, Chloroform-*d*)  $\delta$  141.6, 140.4, 133.8, 129.2, 128.8 (q,  $J = 315.2$  Hz), 128.8, 127.6, 127.5, 127.1, 123.1 (q,  $J = 260.4$  Hz), 56.2.

HRMS (EI) calculated for  $\text{C}_{15}\text{H}_{11}\text{F}_6\text{NS}$ : 351.0511  $[\text{M}]^+$ , Found: 351.0516.

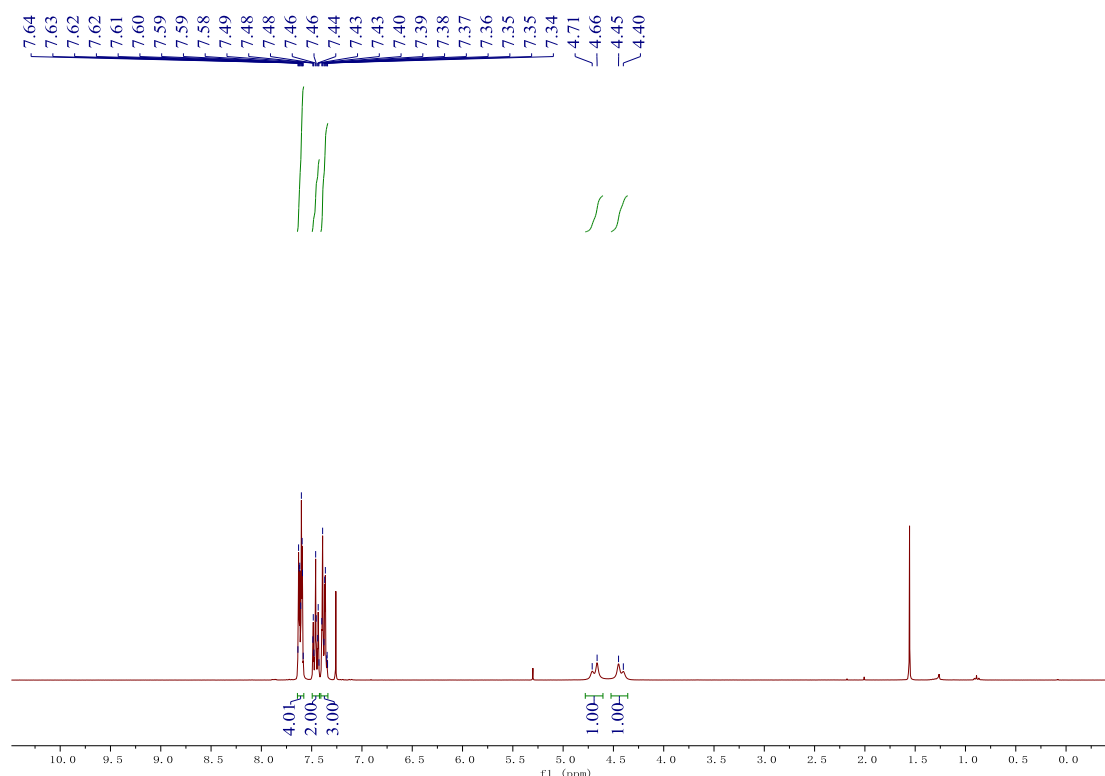



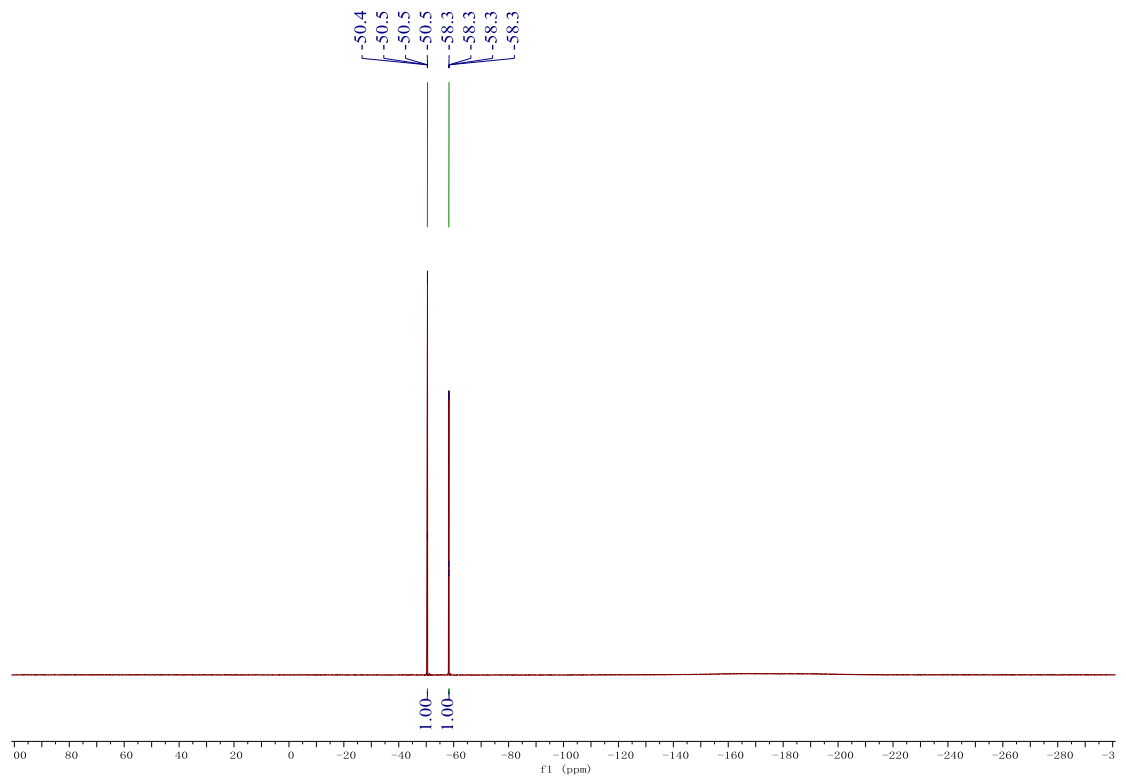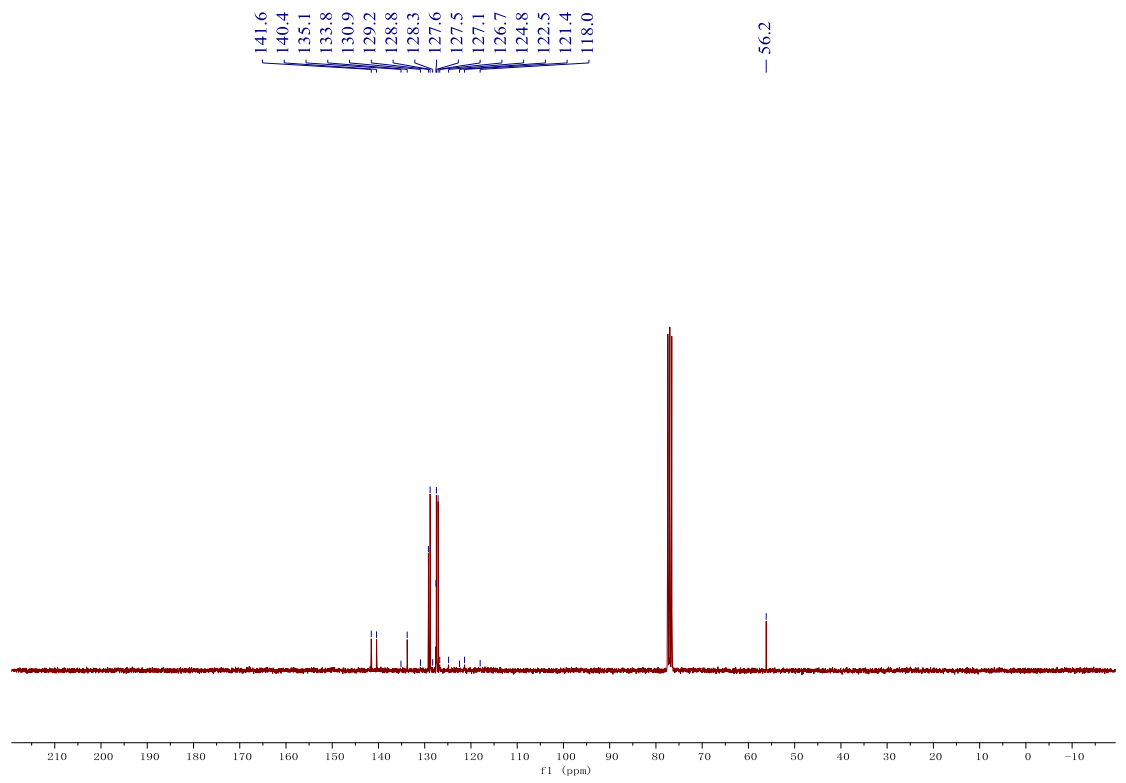

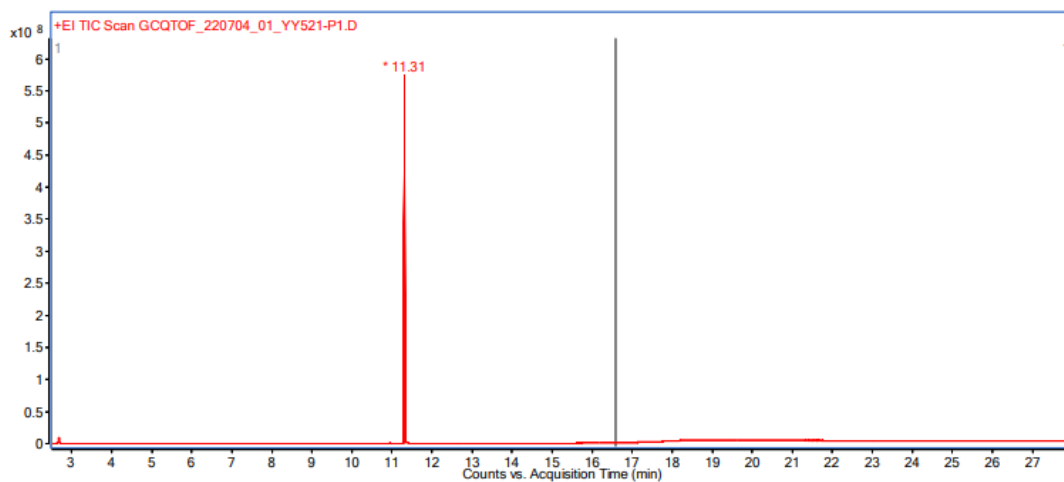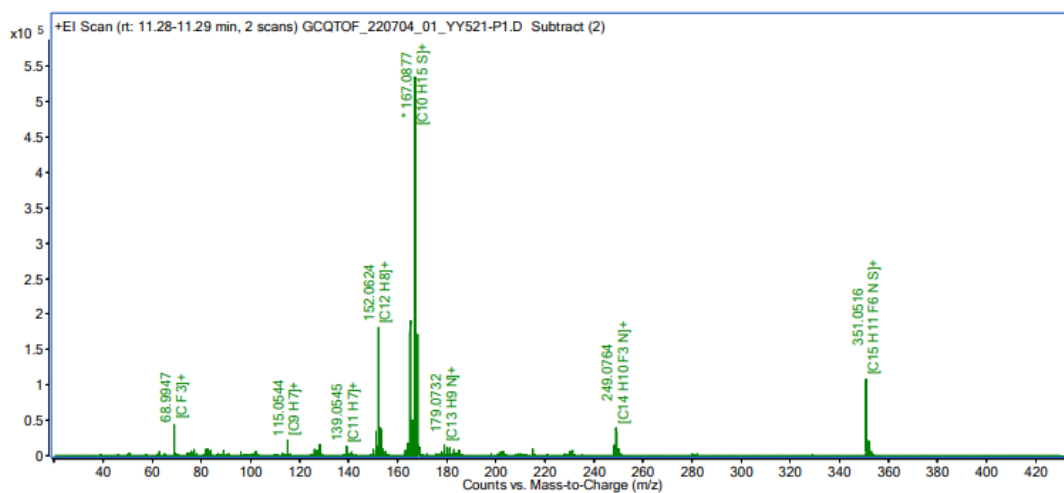

| m/z      | Ion Formula | m/z (Calc) | Diff (ppm) | [M] <sup>+</sup> |
|----------|-------------|------------|------------|------------------|
| 351.0516 | C15H11F6NS  | 351.0511   | 1.4        | [M] <sup>+</sup> |

### N-(4-methoxybenzyl)-N,S-bis(trifluoromethyl)thiohydroxylamine (3c)

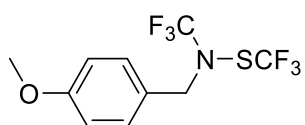

The compound **3c** was obtained as a colorless oil in 30% yield using 1-(isothiocyanatomethyl)-4-methoxybenzene following the general procedure E after column chromatography on silica gel with pentane.

<sup>1</sup>H NMR (300 MHz, Chloroform-*d*) δ 7.25 – 7.22 (m, 2H), 6.92 – 6.88 (m, 2H), 4.56 (d, *J* = 14.1 Hz, 1H), 4.30 (d, *J* = 13.7 Hz, 1H), 3.82 (s, 3H).

<sup>19</sup>F NMR (282 MHz, Chloroform-*d*) δ -50.5 (q, *J* = 3.4 Hz), -58.2 (q, *J* = 3.4 Hz).

<sup>13</sup>C{<sup>1</sup>H} NMR (75 MHz, Chloroform-*d*) δ 159.8, 130.4, 128.9 (q, *J* = 316.9 Hz), 126.8, 123.1 (q, *J*

= 260.4 Hz), 114.1, 55.8, 55.3.

HRMS (EI) calculated for C<sub>10</sub>H<sub>9</sub>F<sub>6</sub>NOS: 305.0304 [M]<sup>+</sup>, Found: 305.0297.

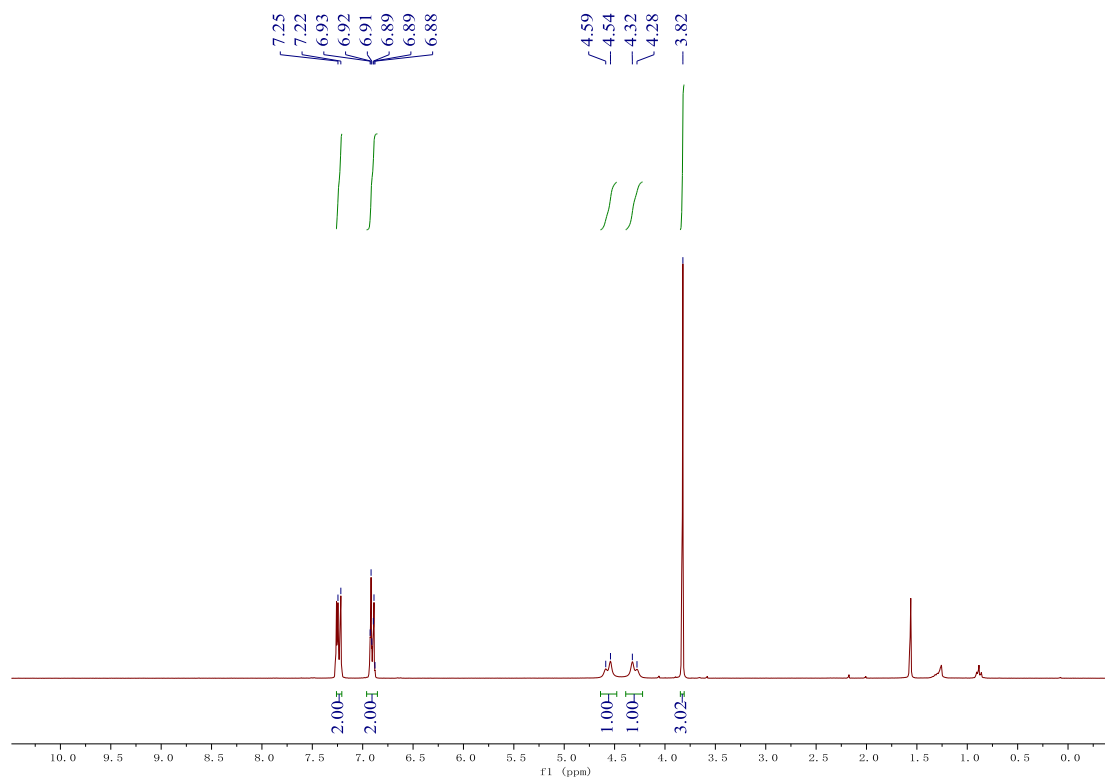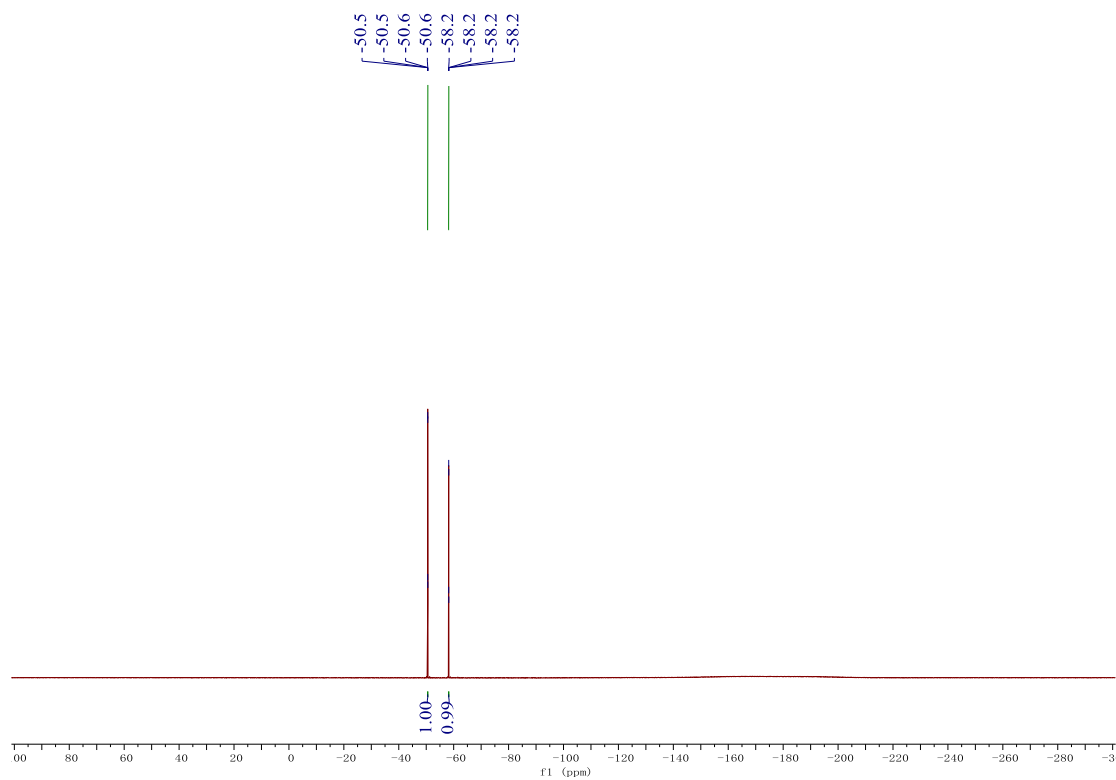

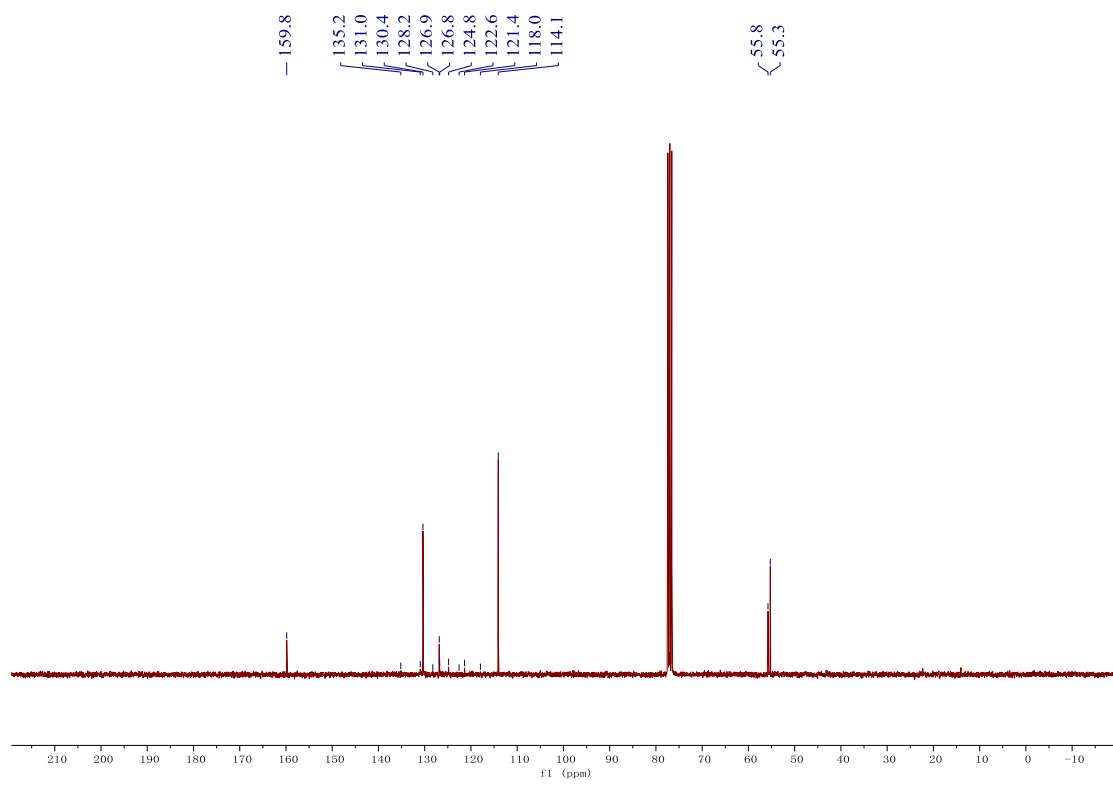

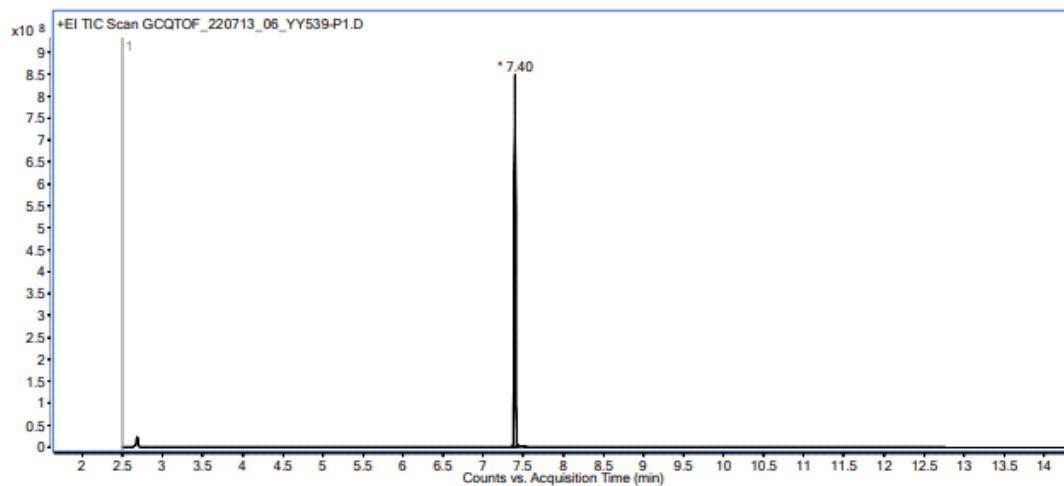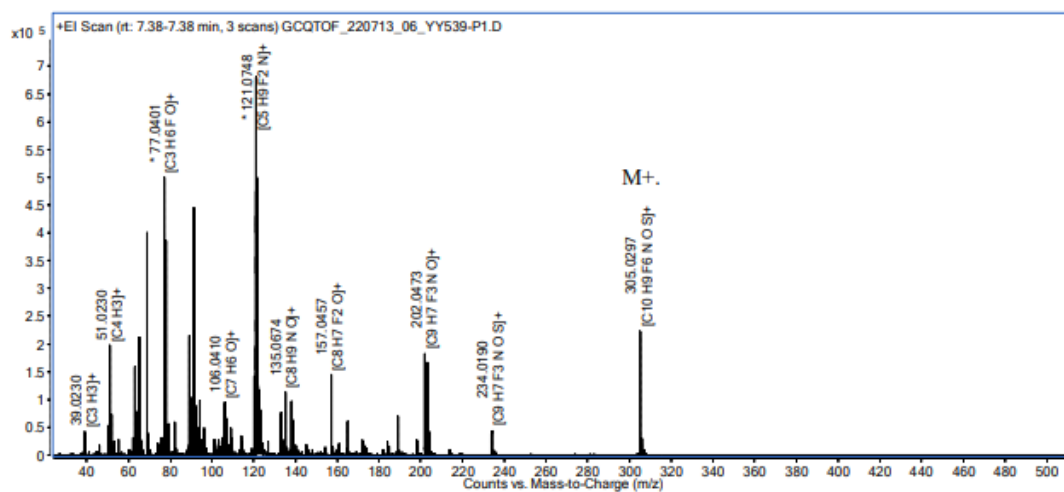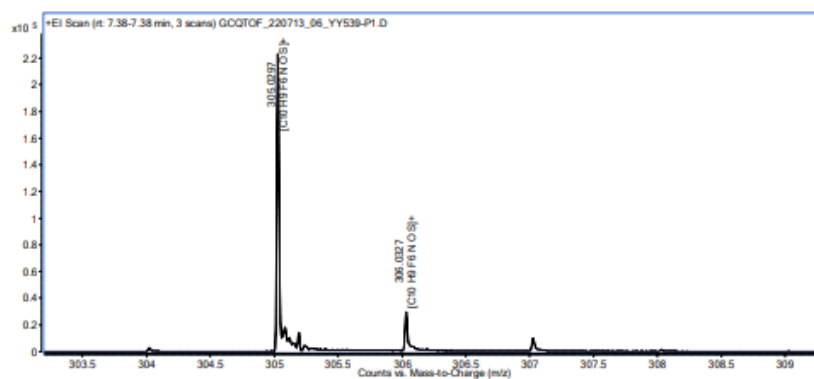

| m/z      | Formula (M)                                       | m/z (Calc) | Diff (ppm) |
|----------|---------------------------------------------------|------------|------------|
| 305.0297 | C <sub>10</sub> H <sub>9</sub> F <sub>6</sub> NOS | 305.0304   | -2.3       |

[M]<sup>+</sup>

***tert*-butyl 3-(2-((trifluoromethyl)((trifluoromethyl)thio)amino)ethyl)-1H-indole-1-carboxylate (3d)**

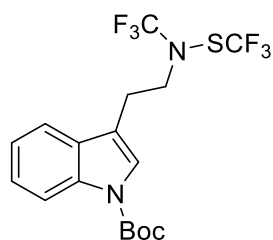

The compound **3d** was obtained as a colorless oil in 35% yield using tert-butyl 3-(2-isothiocyanatoethyl)-1H-indole-1-carboxylate following the general procedure E after column chromatography on silica gel with pentane.

$^1\text{H}$  NMR (300 MHz, Chloroform-*d*)  $\delta$  8.15 (d,  $J = 8.1$  Hz, 1H), 7.51 (d,  $J = 7.4$  Hz, 1H), 7.43 (s, 1H), 7.39 – 7.32 (m, 1H), 7.30 – 7.25 (m, 1H), 3.82 – 3.75 (m, 1H), 3.64 – 3.55 (m, 1H), 3.09 (t,  $J = 8.0$  Hz, 2H), 1.68 (s, 9H).

$^{19}\text{F}$  NMR (282 MHz, Chloroform-*d*)  $\delta$  -51.3 (q,  $J = 3.4$  Hz), -58.7 (q,  $J = 3.4$  Hz).

$^{13}\text{C}\{^1\text{H}\}$  NMR (75 MHz, Chloroform-*d*)  $\delta$  149.6, 135.5, 130.0, 128.7 (q,  $J = 318.1$  Hz), 124.7, 123.5, 123.1 (q,  $J = 259.8$  Hz), 122.7, 118.4, 115.8, 115.4, 83.8, 53.3, 28.2, 24.4.

HRMS (ESI) calculated for  $\text{C}_{17}\text{H}_{19}\text{F}_6\text{N}_2\text{O}_2\text{S}$ : 429.1066  $[\text{M}+\text{H}]^+$ , Found: 429.1066.

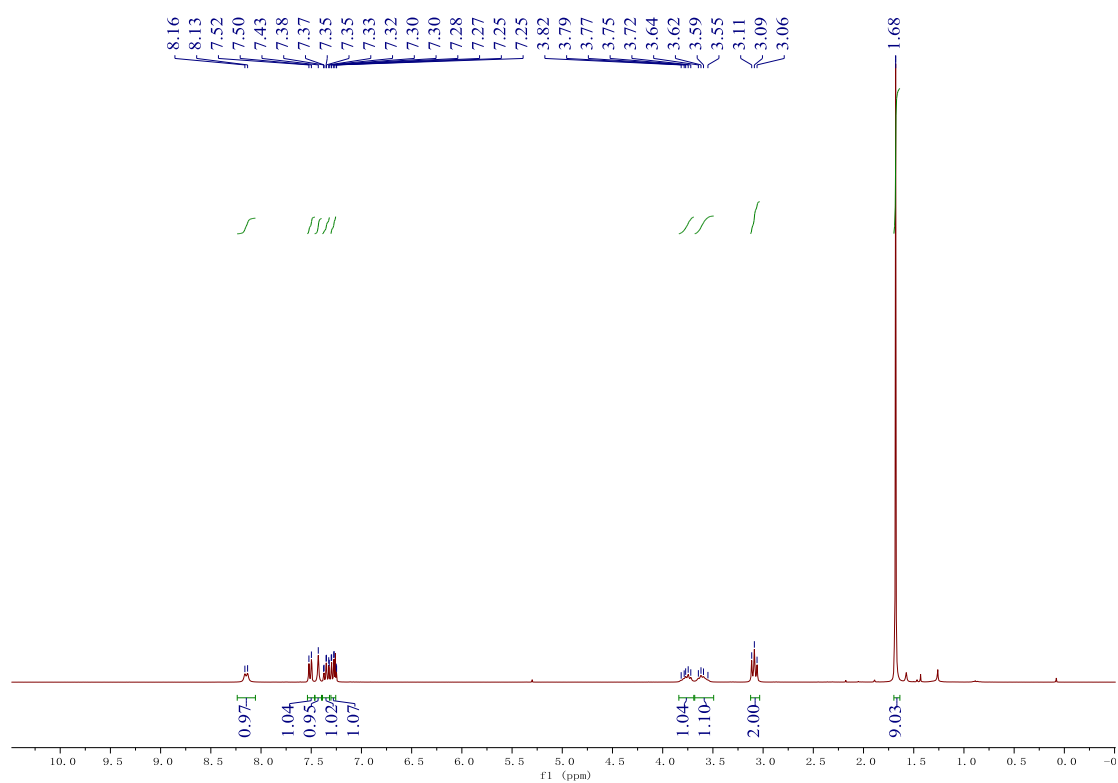

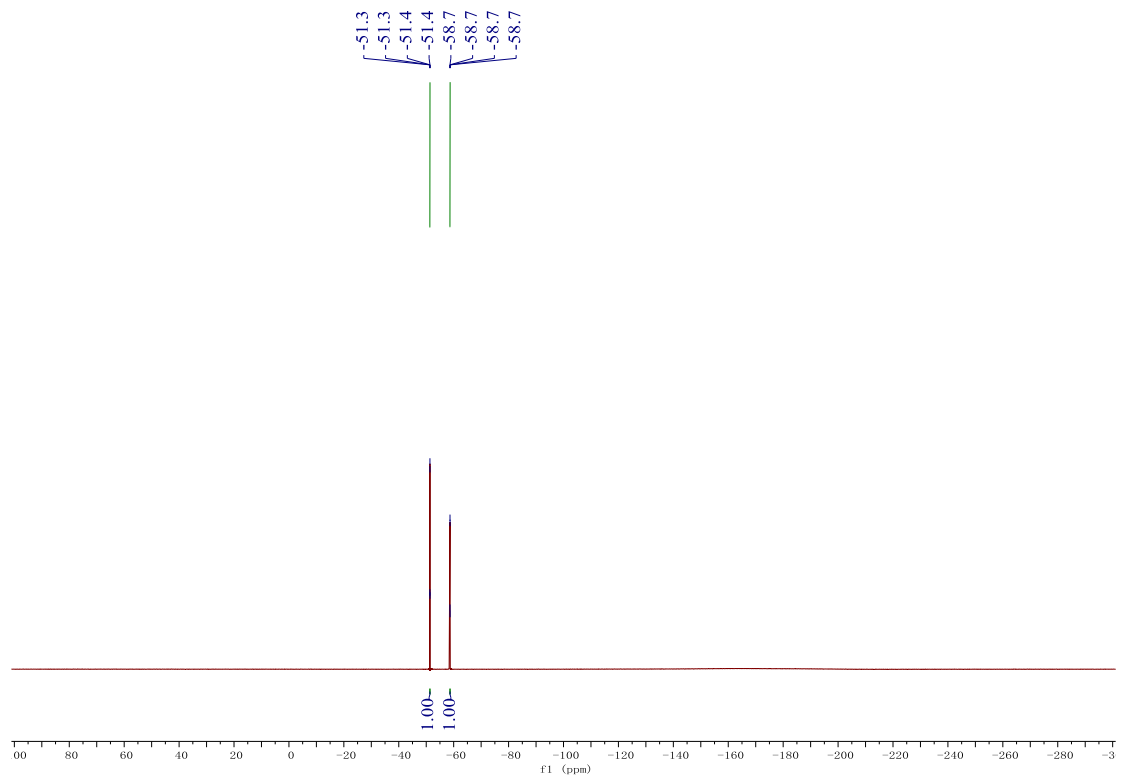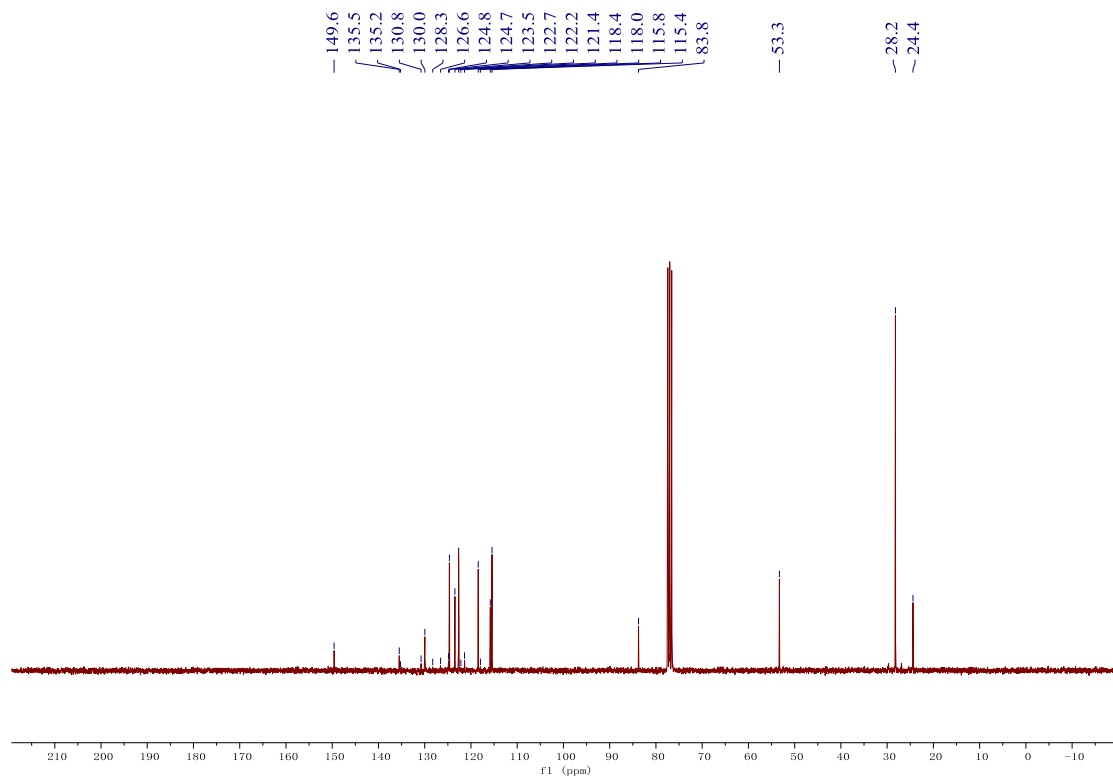

CENTRE COMMUN DE SPECTROMETRIE DE MASSE

**Analysis Info**

Analysis Name Impact2\_220609\_01\_YY426-P1.d  
 Method Tune\_pos\_Standard.m  
 Comment  
 Acquisition Date 6/9/2022 9:00:18 AM  
 Instrument / Ser# impact II 1825265.1  
 0081

**Acquisition Parameter**

Source Type **ESI** Ion Polarity **Positive** Set Nebulizer 0.3 Bar  
 Focus Active Set Capillary 2500 V Set Dry Heater 200 °C  
 Scan Begin 50 m/z Set End Plate Offset -500 V Set Dry Gas 4.0 l/min  
 Scan End 1000 m/z Set Collision Cell RF 750.0 Vpp Set Divert Valve Source

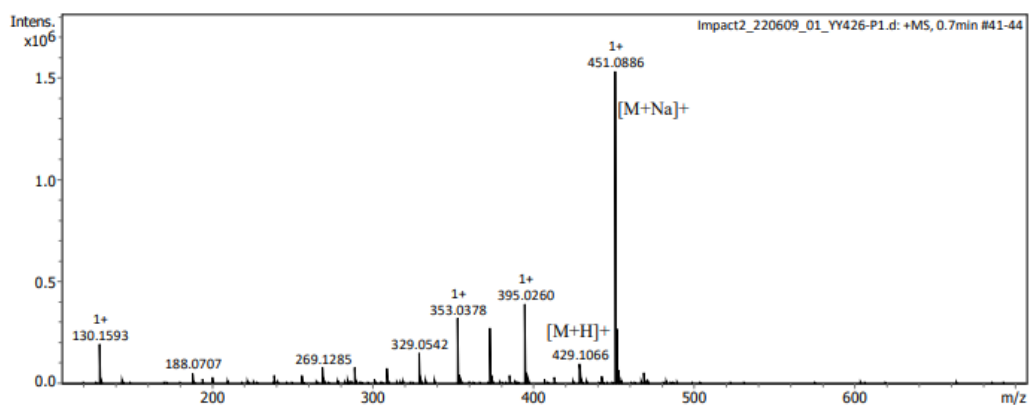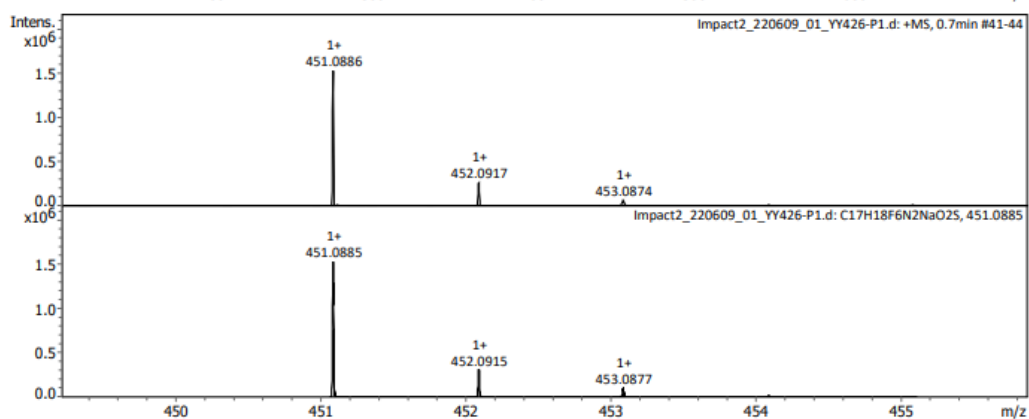

| Meas. m/z | Ion Formula     | m/z      | Sum Formula   | err [ppm] | mSigma | Adduct | z  |
|-----------|-----------------|----------|---------------|-----------|--------|--------|----|
| 429.1066  | C17H19F6N2O2S   | 429.1066 | C17H18F6N2O2S | -0.1      | 10.2   | M+H    | 1+ |
| 451.0886  | C17H18F6N2NaO2S | 451.0885 |               | -0.2      | 17.5   | M+Na   | 1+ |

**N-(1-(2,6-dimethylphenoxy)propan-2-yl)-N,S-bis(trifluoromethyl)thiohydroxylamine (3e)**

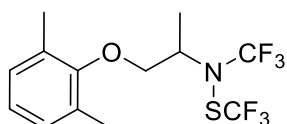

The compound **3e** was obtained as a colorless oil in 49% yield using 4-(4-isothiocyanatobutyl)morpholine following the general procedure E after column chromatography on silica gel with pentane/ether (3/4).

Isomer A:

<sup>1</sup>H NMR (300 MHz, Chloroform-*d*) δ 7.00 (s, 2H), 6.96 – 6.94 (m, 1H), 4.20 – 4.07 (m, 1H), 3.92 – 3.87 (m, 1H), 3.67 – 3.62 (m, 1H), 2.27 (s, 6H), 1.44 (d, *J* = 6.8 Hz, 3H).



$^{19}\text{F}$  NMR (282 MHz, Chloroform-*d*)  $\delta$  -51.4 (q,  $J = 3.4$  Hz), -57.3 (q,  $J = 3.4$  Hz).

$^{13}\text{C}\{^1\text{H}\}$  NMR (75 MHz, Chloroform-*d*)  $\delta$  154.9, 130.7, 129.0, 128.1 (d,  $J = 314.1$  Hz), 124.3, 123.3 (q,  $J = 260.9$  Hz), 72.2, 55.7, 16.4, 16.2

Isomer B:

$^1\text{H}$  NMR (300 MHz, Chloroform-*d*)  $\delta$  7.03 (s, 2H), 6.93 – 6.91 (m, 1H), 4.20 – 4.07 (m, 1H), 3.97 – 3.94 (m, 1H), 3.72 – 3.69 (m, 1H), 2.27 (s, 6H), 1.49 (d,  $J = 6.8$  Hz, 3H).

$^{19}\text{F}$  NMR (282 MHz, Chloroform-*d*)  $\delta$  -51.8 (q,  $J = 3.4$  Hz), -57.1 (q,  $J = 3.4$  Hz).

$^{13}\text{C}\{^1\text{H}\}$  NMR (75 MHz, Chloroform-*d*)  $\delta$  155.3, 130.6, 129.0, 128.2 (d,  $J = 314.1$  Hz), 124.2, 123.3 (q,  $J = 260.9$  Hz), 73.3, 58.0, 16.6, 16.3.

HRMS (EI) calculated for  $\text{C}_{13}\text{H}_{15}\text{F}_6\text{NOS}$ : 347.0773  $[\text{M}]^+$ , Found: 347.0783.

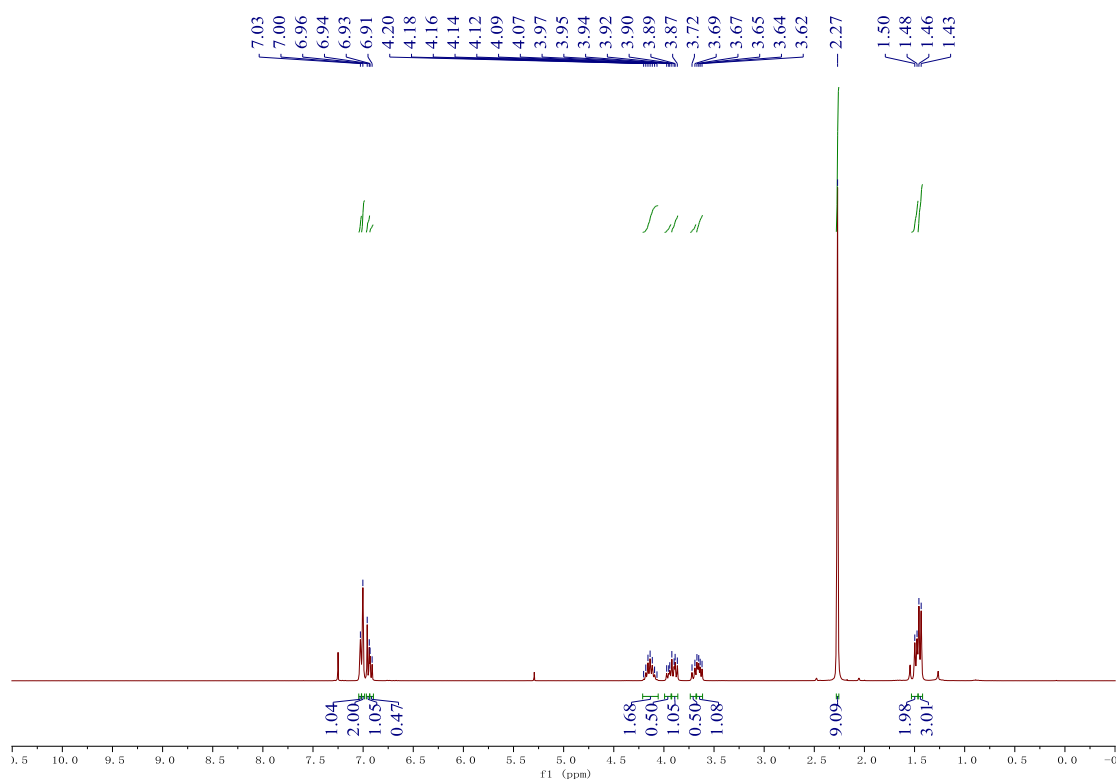

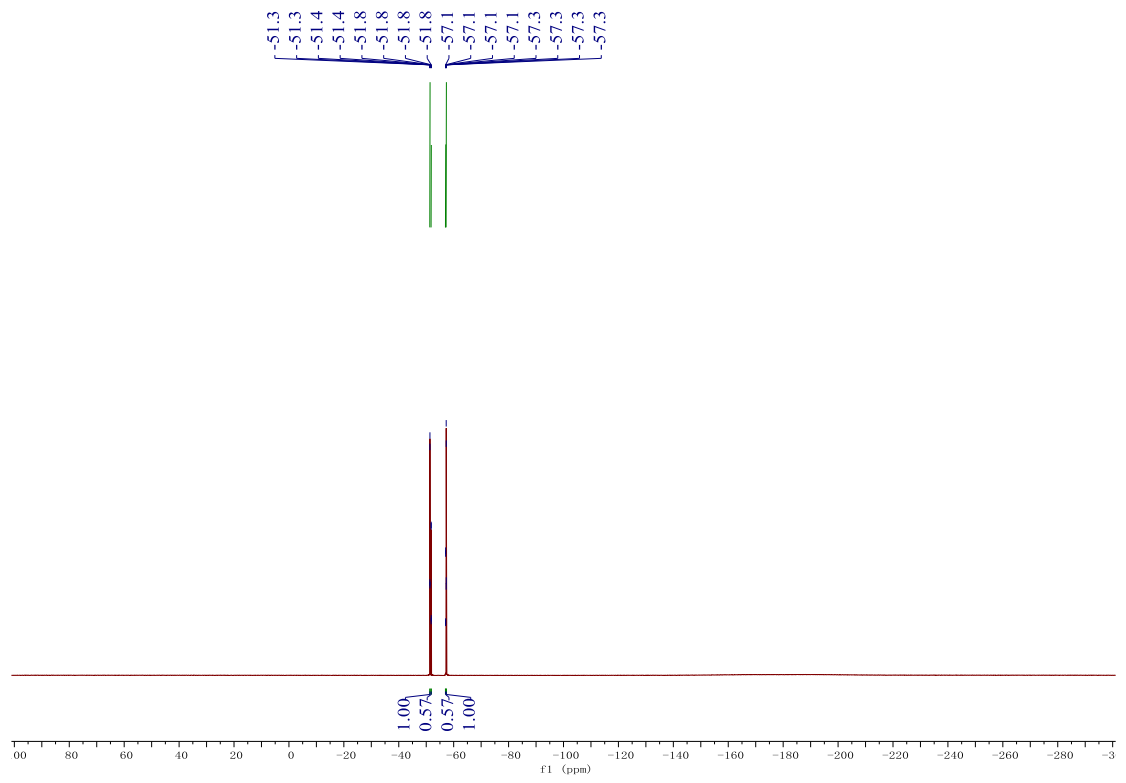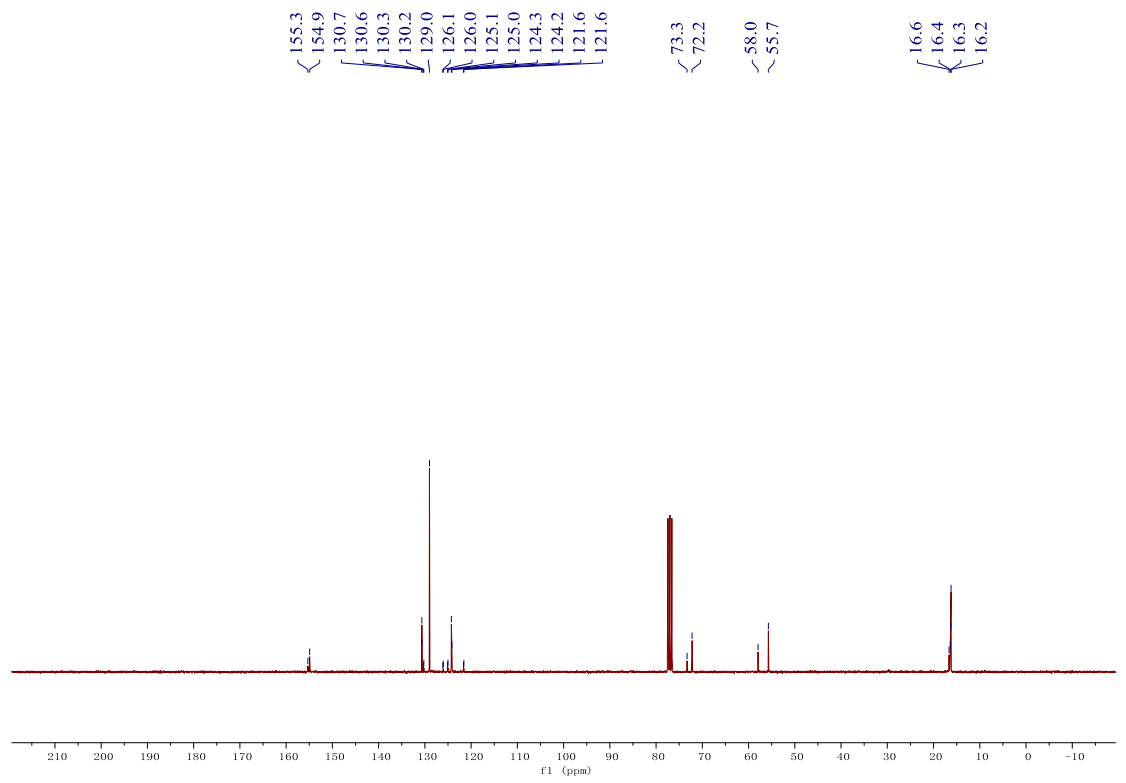

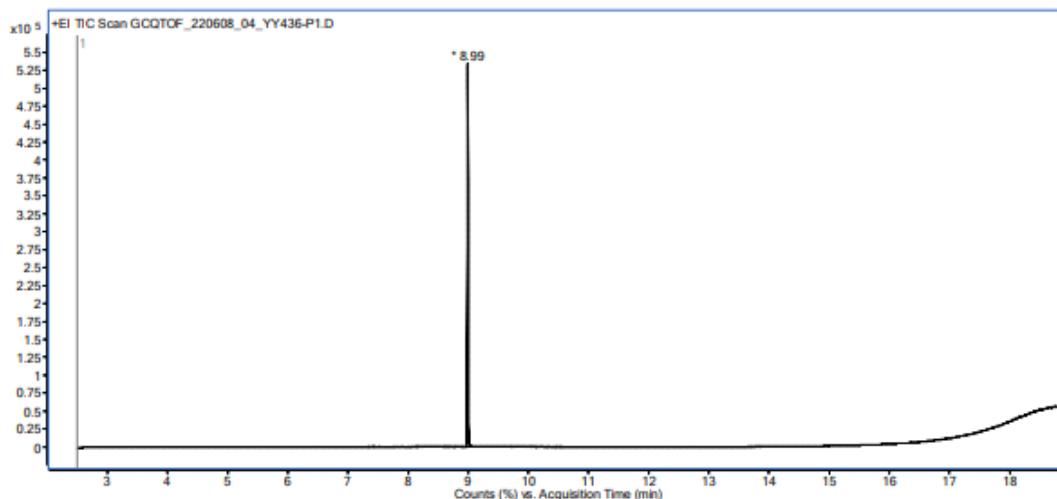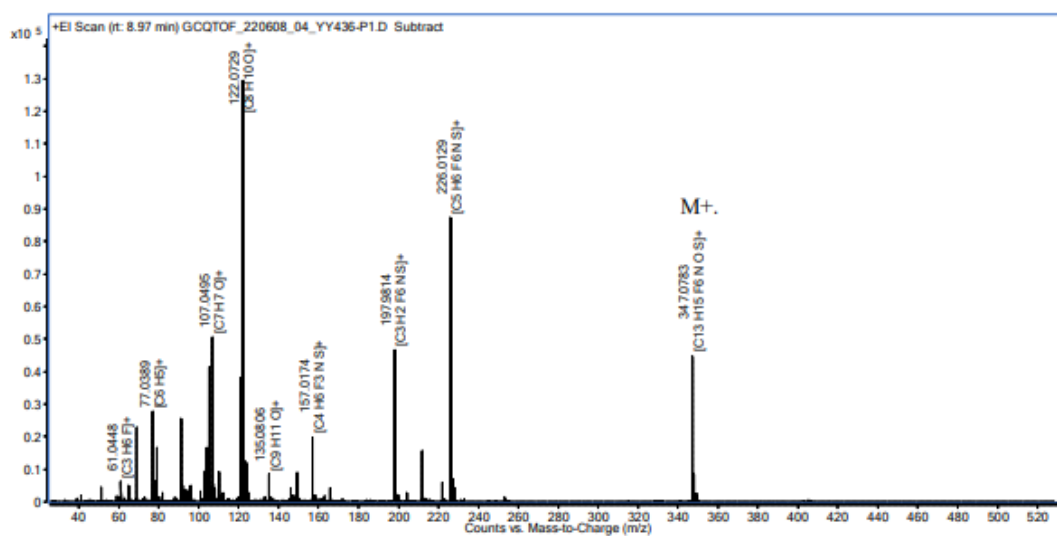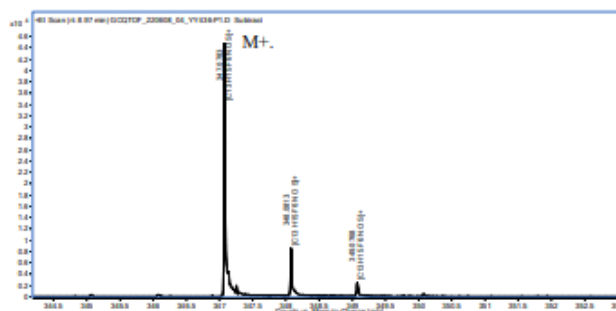

| Meas. m/z | Ion Formula | m/z (Calc) | err (ppm) | [M] <sup>+</sup> |
|-----------|-------------|------------|-----------|------------------|
| 347.0783  | C13H15F6NOS | 347.0773   | 2.9       |                  |

### N-(3-phenylpropyl)-N,S-bis(trifluoromethyl)thiohydroxylamine (3f)

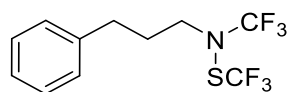

The compound **3f** was obtained as a colorless oil in 67% yield using (3-isothiocyanatopropyl)benzene following the general procedure E after column chromatography on silica gel with pentane.

$^1\text{H}$  NMR (300 MHz, Chloroform-*d*)  $\delta$  7.34 – 7.29 (m, 2H), 7.26 – 7.15 (m, 3H), 3.44 – 3.32 (m, 2H), 2.68 – 2.59 (m, 2H), 2.09 – 1.98 (m, 2H).

$^{19}\text{F}$  NMR (282 MHz, Chloroform-*d*)  $\delta$  -51.1 (q,  $J = 3.4$  Hz), -59.0 (q,  $J = 3.4$  Hz).

$^{13}\text{C}\{^1\text{H}\}$  NMR (75 MHz, Chloroform-*d*)  $\delta$  140.6, 128.7 (q,  $J = 314.9$  Hz), 128.5, 128.2, 126.2, 123.1 (q,  $J = 259.7$  Hz), 52.9, 32.4, 29.6.

HRMS (EI) calculated for  $\text{C}_{11}\text{H}_{11}\text{F}_6\text{NS}$ : 303.0511  $[\text{M}]^+$ , Found: 303.0500.

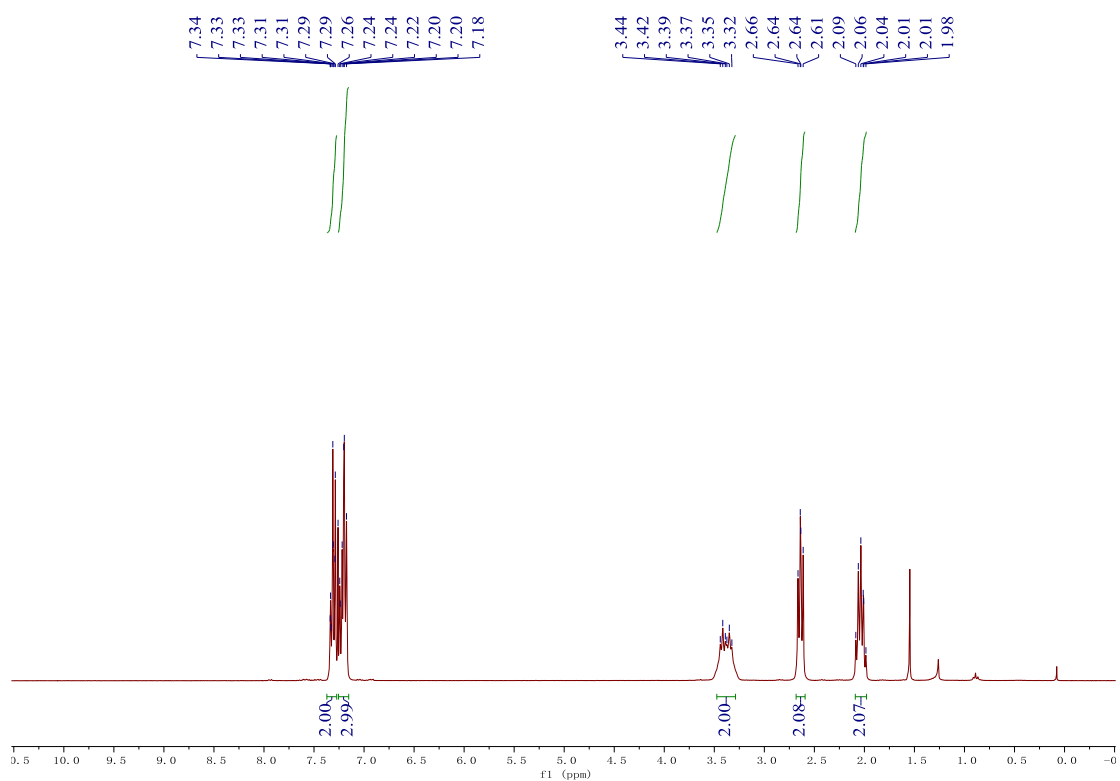

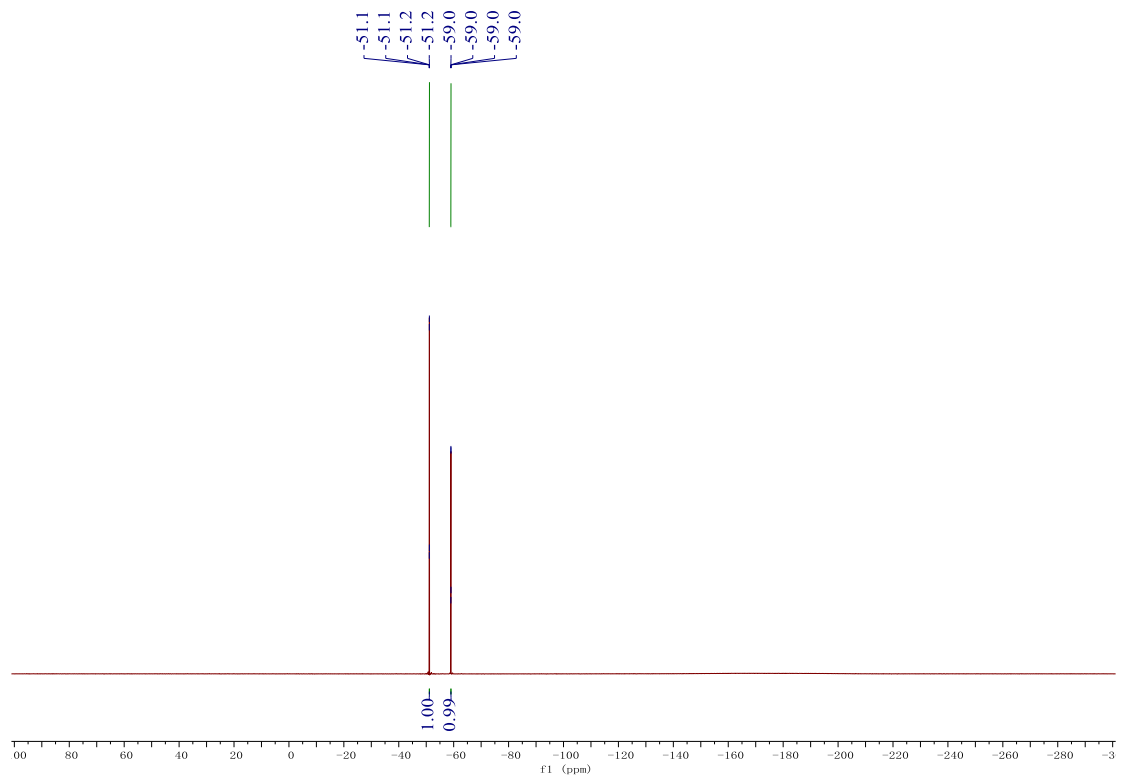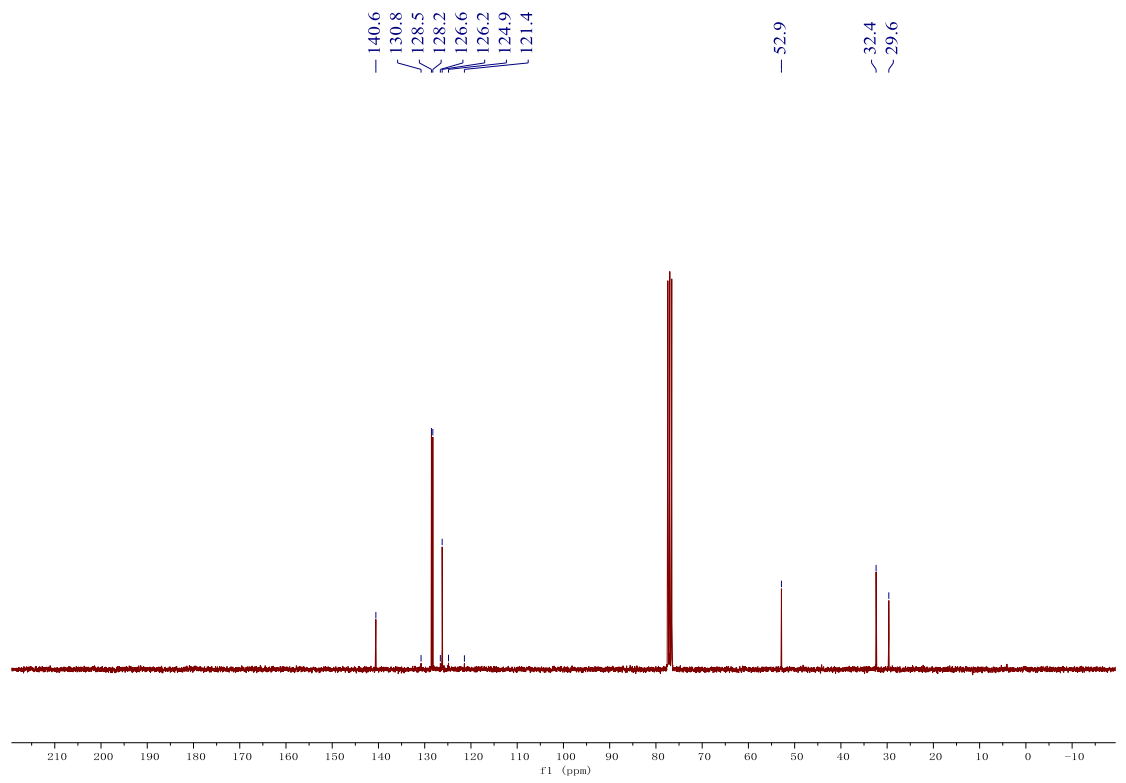



$^1\text{H}$  NMR (300 MHz, Chloroform-*d*)  $\delta$  7.31 – 7.14 (m, 5H), 3.42 (s, 2H), 3.39 – 3.30 (m, 1H), 2.97 – 2.78 (m, 2H), 2.02 – 1.84 (m, 3H), 1.76 – 1.60 (m, 3H).

$^{19}\text{F}$  NMR (282 MHz, Chloroform-*d*)  $\delta$  -51.7 (q,  $J = 3.4$  Hz), -57.5 (q,  $J = 3.4$  Hz).

$^{13}\text{C}\{^1\text{H}\}$  NMR (75 MHz, Chloroform-*d*)  $\delta$  138.1, 129.0, 128.3, 128.0 (q,  $J = 314.8$  Hz), 127.1, 123.5 (q,  $J = 259.9$  Hz), 62.7, 58.4, 52.6, 52.5, 30.9, 30.7.

HRMS (EI) calculated for  $\text{C}_{14}\text{H}_{16}\text{F}_6\text{N}_2\text{S}$ : 358.0933  $[\text{M}]^+$ , Found: 358.0937.

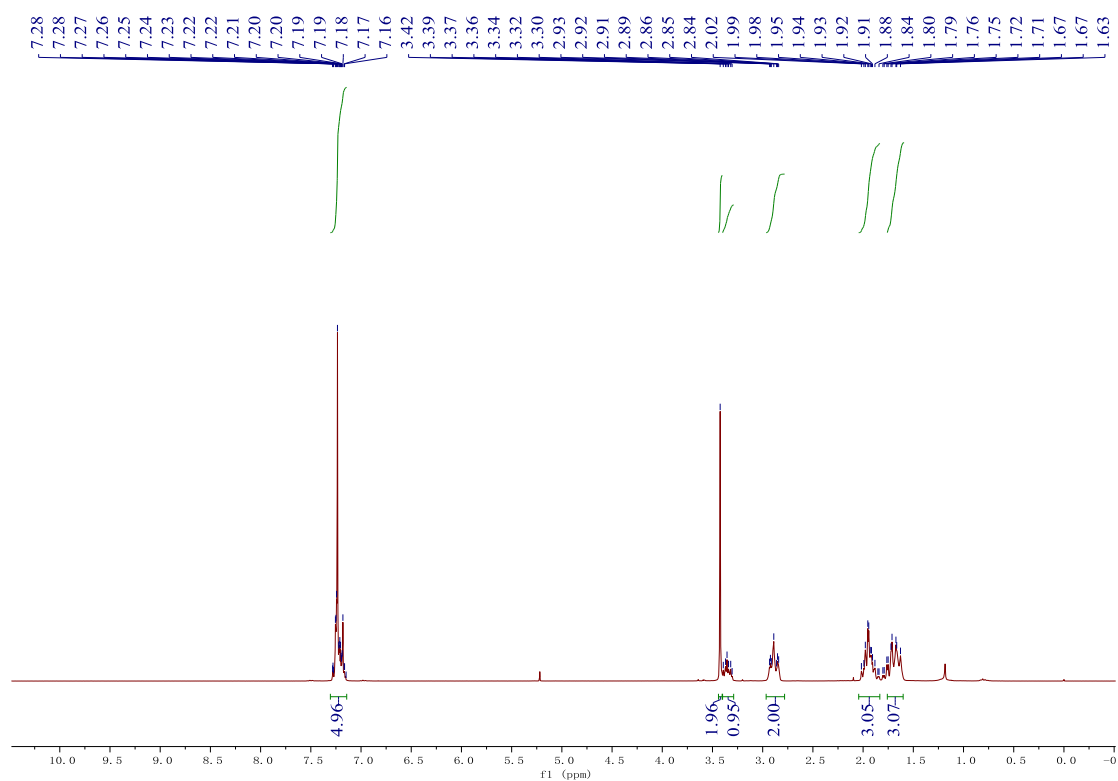

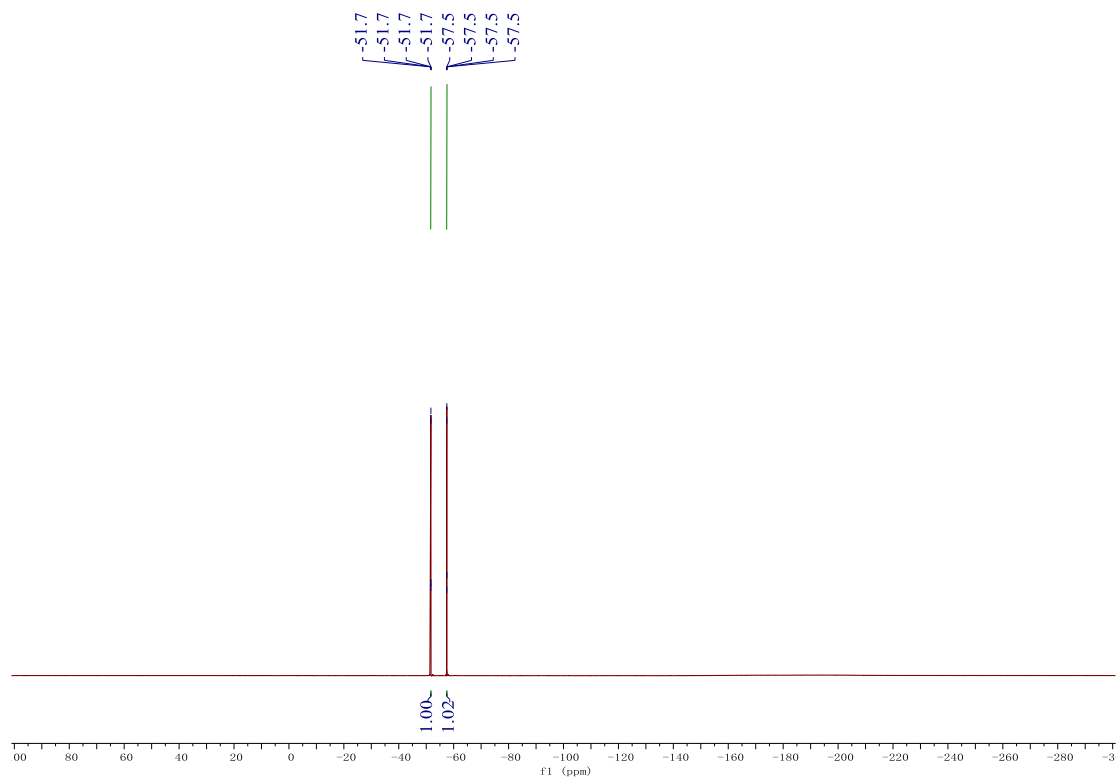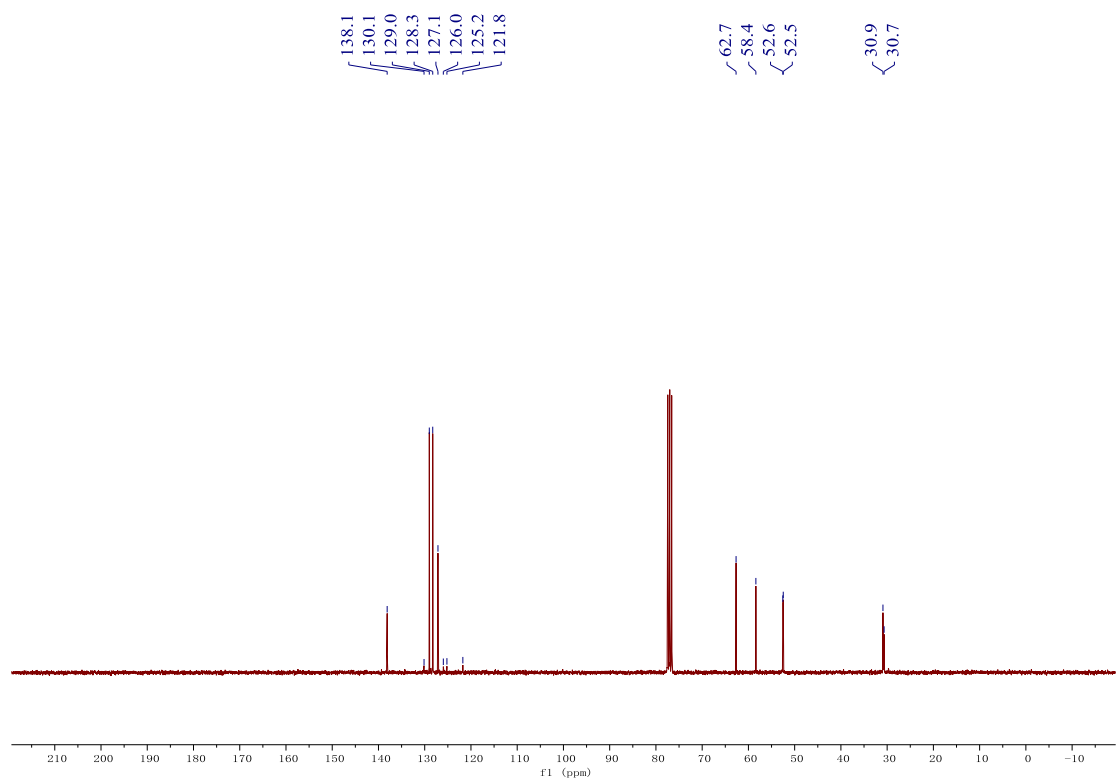



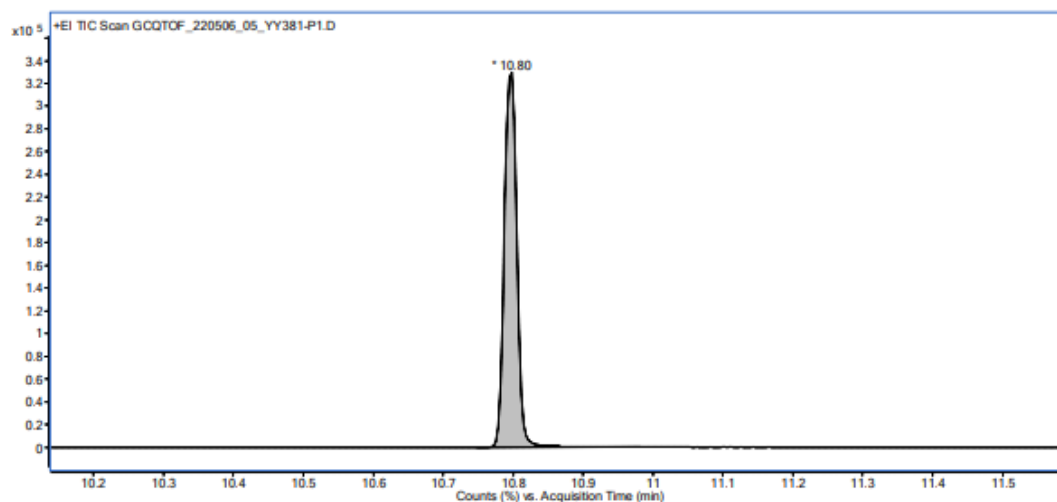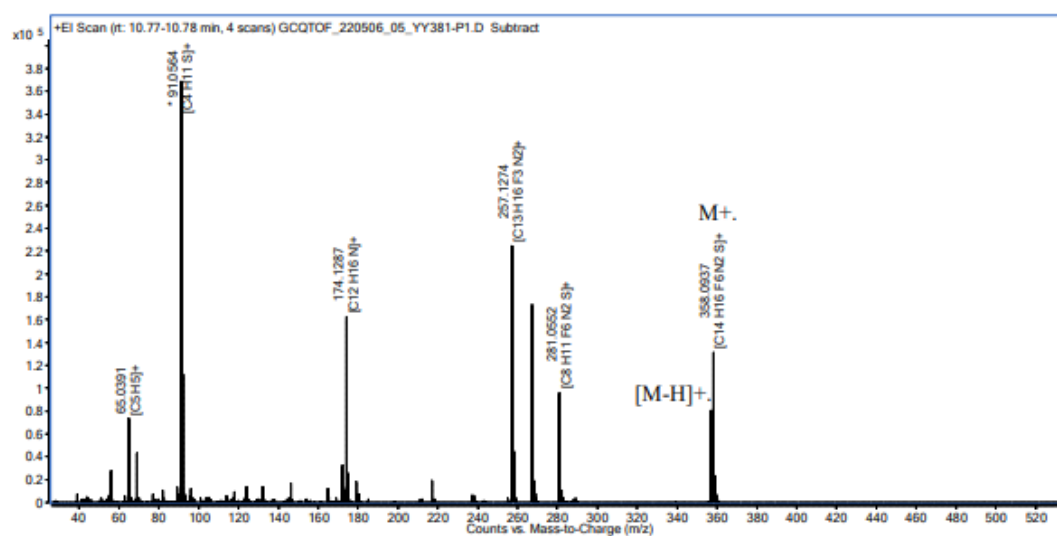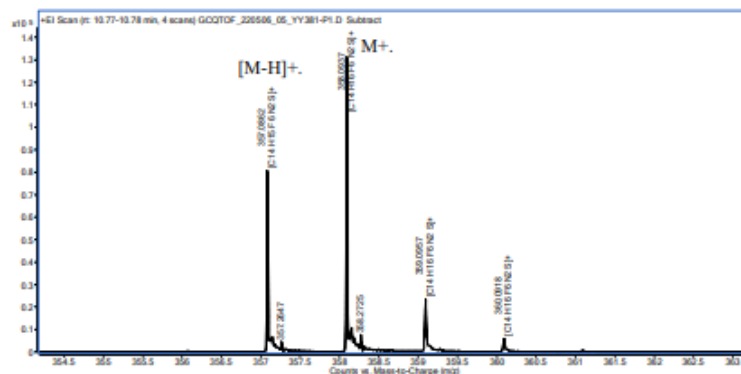

| m/z      | Ion Formula | Sum Formula | m/z (Calc) | Diff (ppm) |                    |
|----------|-------------|-------------|------------|------------|--------------------|
| 357.0862 | C14H15F6N2S | C14H16F6N2S | 357.0855   | 2.0        | [M-H] <sup>+</sup> |
| 358.0937 | C14H16F6N2S |             | 358.0933   | 1.1        | [M] <sup>+</sup>   |

**tert-butyl 4-((trifluoromethyl)((trifluoromethyl)thio)amino)piperidine-1-carboxylate (3h)**

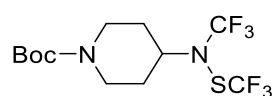

The compound **3h** was obtained as a colorless oil in 54% yield using tert-butyl 4-isothiocyanatopiperidine-1-carboxylate following the general procedure E after column

chromatography on silica gel with pentane/ether (10/1).

$^1\text{H}$  NMR (300 MHz, Chloroform-*d*)  $\delta$  4.22 (s, 2H), 3.60 – 3.50 (m, 1H), 2.75 – 2.67 (m, 2H), 1.83 – 1.60 (m, 4H), 1.46 (s, 9H).

$^{19}\text{F}$  NMR (282 MHz, Chloroform-*d*)  $\delta$  -51.6 (q,  $J = 3.4$  Hz), -57.5 (q,  $J = 3.4$  Hz).

$^{13}\text{C}\{^1\text{H}\}$  NMR (75 MHz, Chloroform-*d*)  $\delta$  154.4, 127.9 (q,  $J = 315.2$  Hz), 123.3 (q,  $J = 260.5$  Hz), 80.0, 58.2, 42.8, 30.8, 30.5, 28.3.

HRMS (EI) calculated for  $\text{C}_{12}\text{H}_{18}\text{F}_6\text{N}_2\text{O}_2\text{S}$ : 368.0988  $[\text{M}]^+$ , Found: 368.0998.

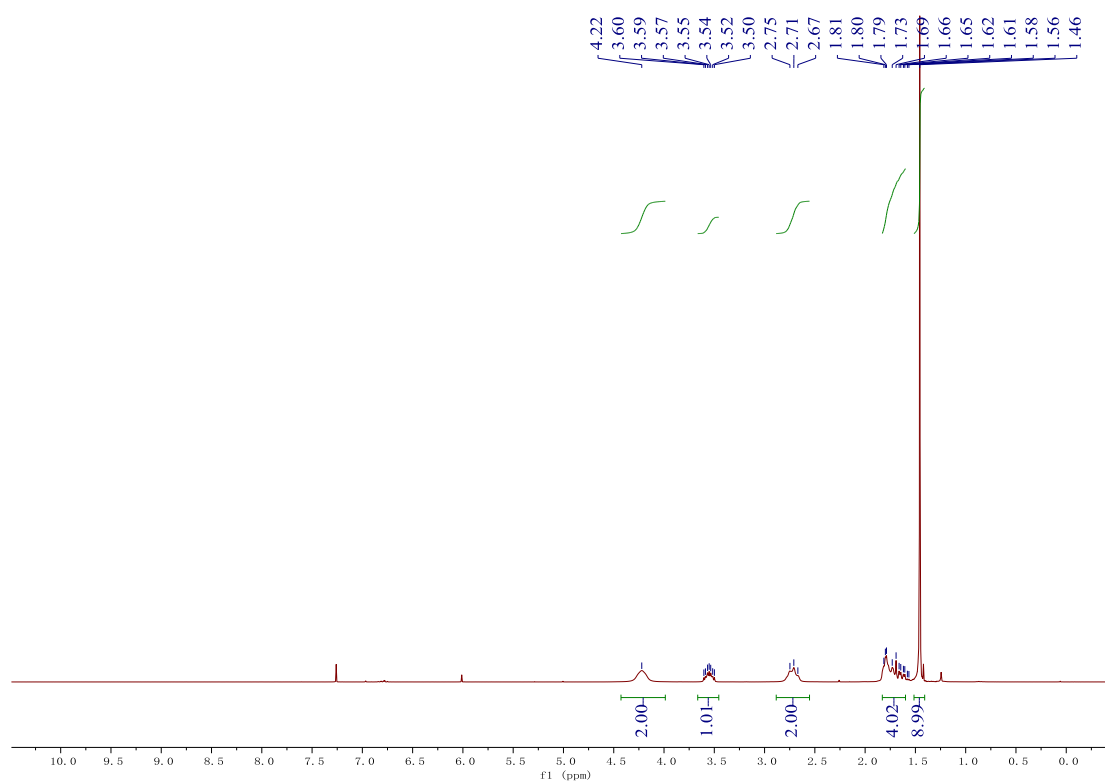

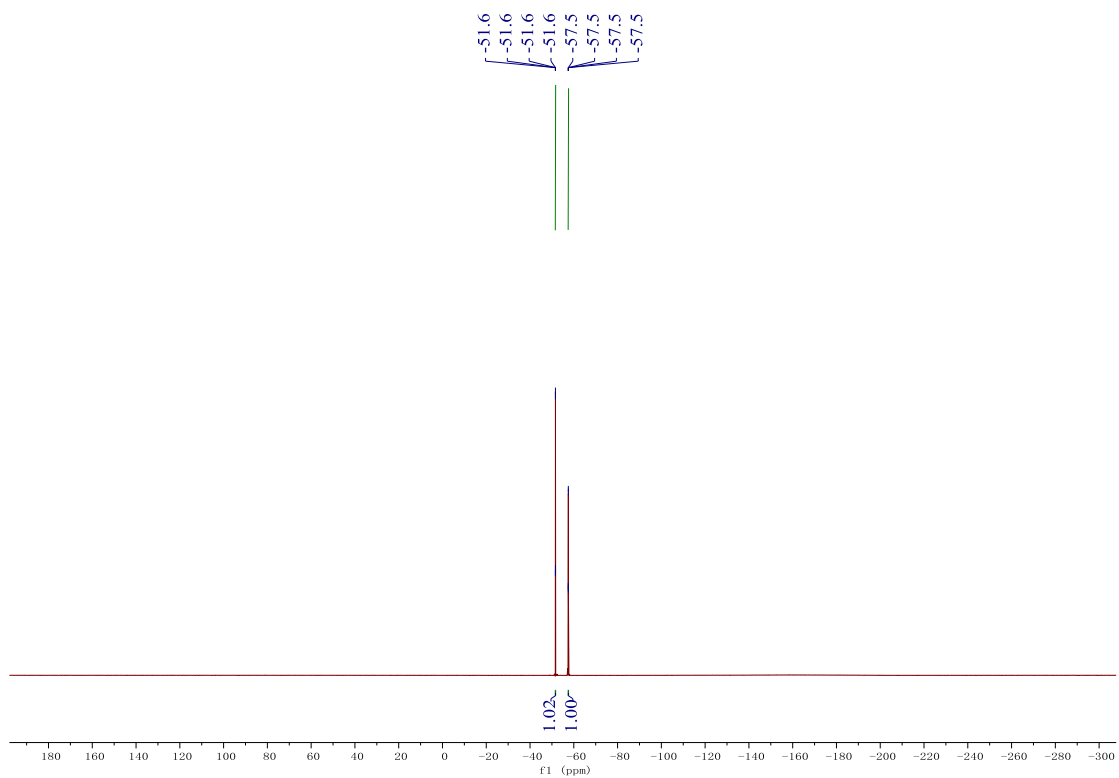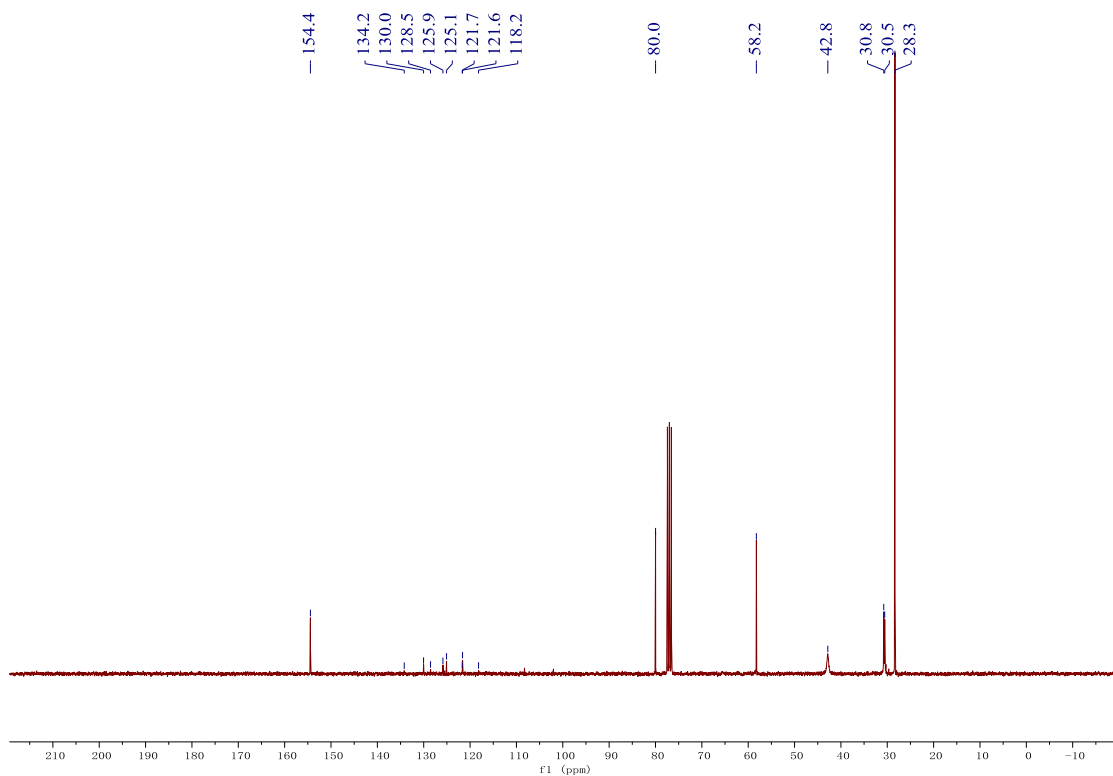

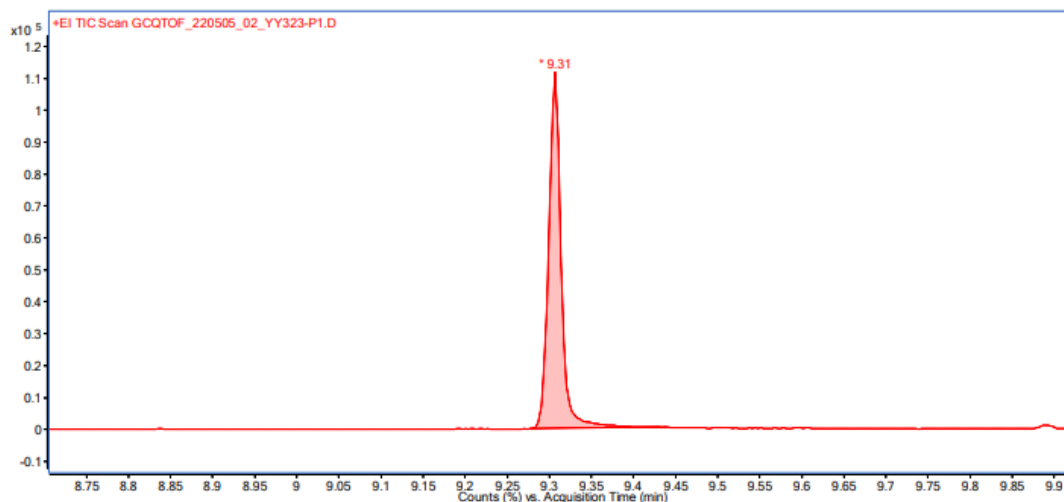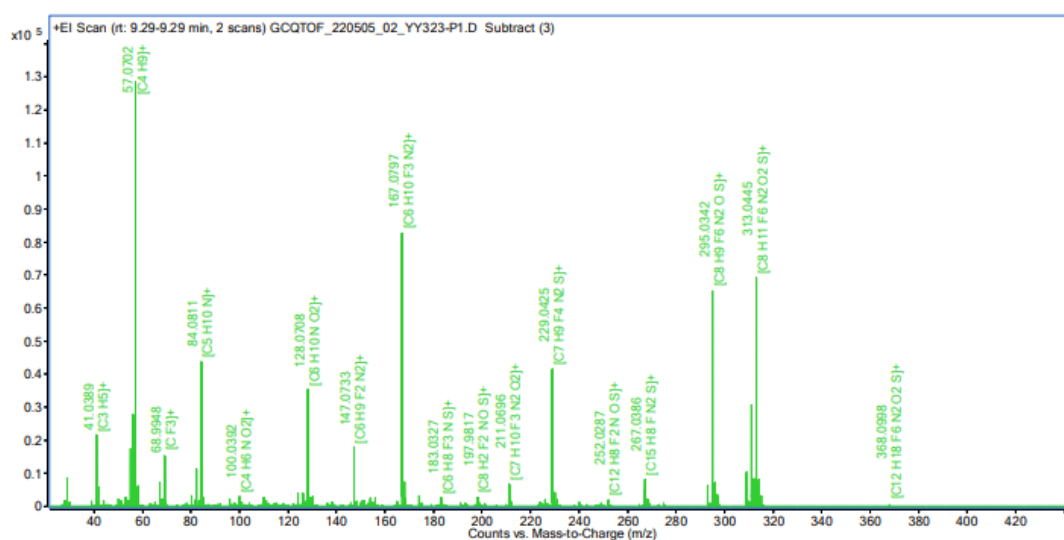

| m/z      | Formula (M)                                                                    | m/z (Calc) | Diff (ppm) | [M] <sup>+</sup> |
|----------|--------------------------------------------------------------------------------|------------|------------|------------------|
| 368.0998 | C <sub>12</sub> H <sub>18</sub> F <sub>6</sub> N <sub>2</sub> O <sub>2</sub> S | 368.0988   | 2.7        | [M] <sup>+</sup> |

### N-(4-morpholinobutyl)-N,S-bis(trifluoromethyl)thiohydroxylamine (**3i**)

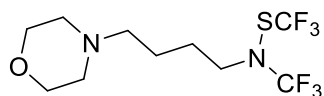

The compound **3i** was obtained as a colorless oil in 56% yield using 4-(4-isothiocyanatobutyl)morpholine following the general procedure E after column chromatography on silica gel with pentane/ether (3/4).

<sup>1</sup>H NMR (300 MHz, Chloroform-*d*) δ 3.68 – 3.60 (m, 4H), 3.38 (dt, *J* = 27.3, 7.6 Hz, 2H), 2.46 – 2.33 (m, 4H), 2.29 (t, *J* = 6.9 Hz, 2H), 1.79 (p, *J* = 6.8 Hz, 2H).

<sup>19</sup>F NMR (282 MHz, Chloroform-*d*) δ -51.4 (q, *J* = 3.4 Hz), -58.9 (q, *J* = 3.4 Hz).

$^{13}\text{C}\{^1\text{H}\}$  NMR (75 MHz, Chloroform-*d*)  $\delta$  141.7, 141.1, 139.7, 128.9, 128.5 (d,  $J = 314.1$  Hz), 128.2, 127.9, 127.3, 127.2, 122.1 (q,  $J = 260.9$  Hz).

HRMS (EI) calculated for  $\text{C}_9\text{H}_{14}\text{F}_6\text{N}_2\text{OS}$ : 312.0726  $[\text{M}]^+$ , Found: 312.0715.

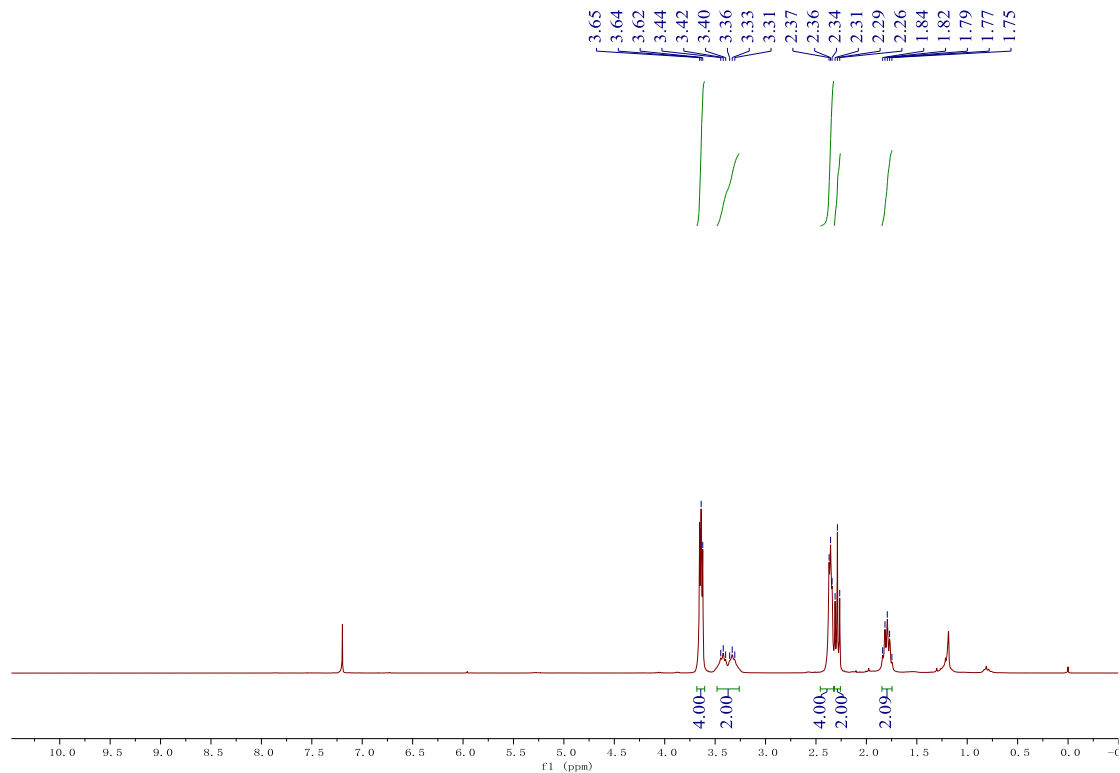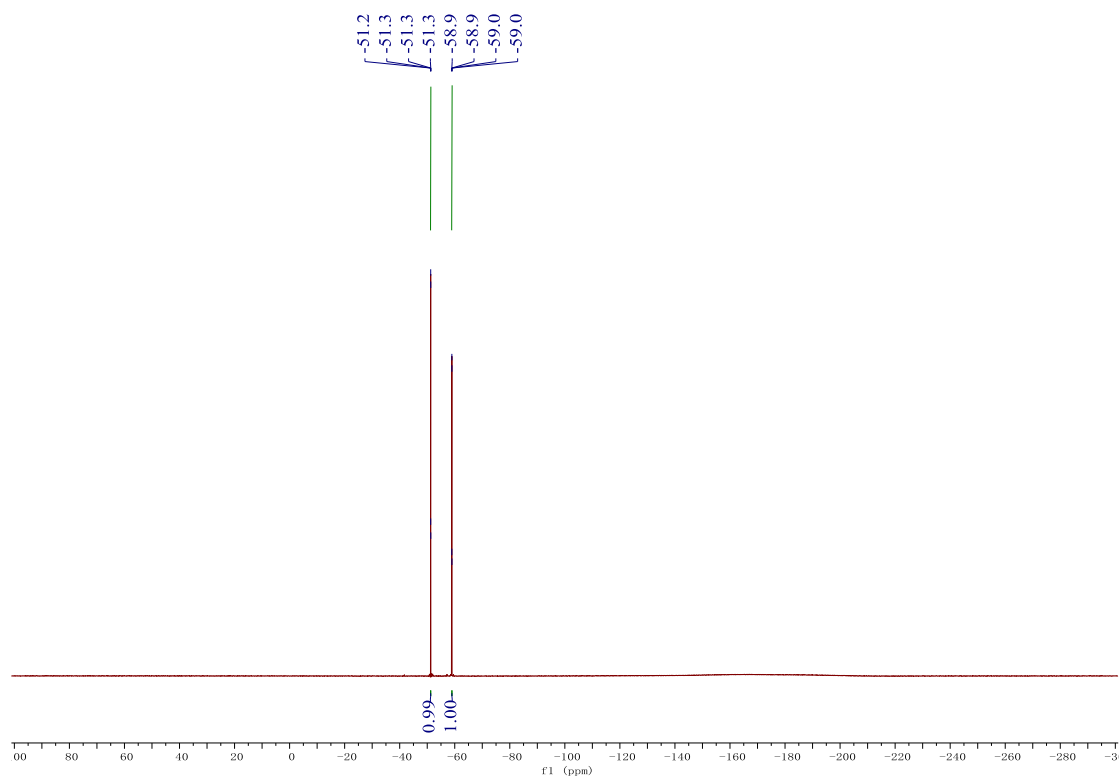

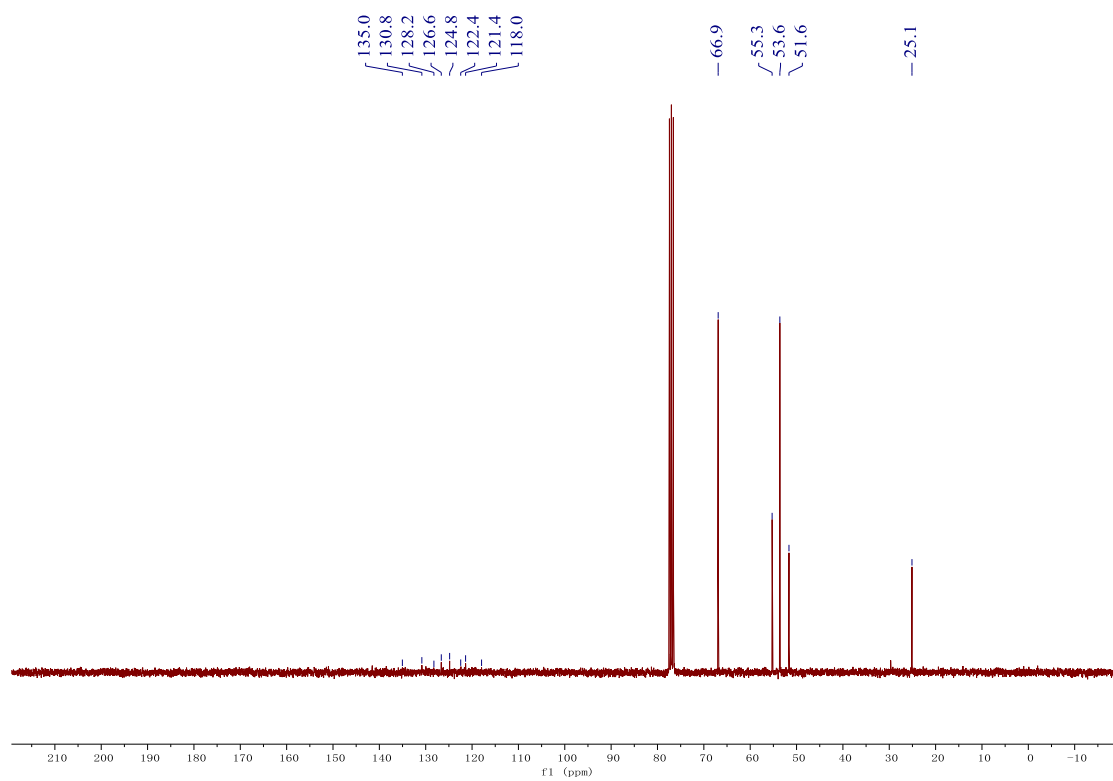

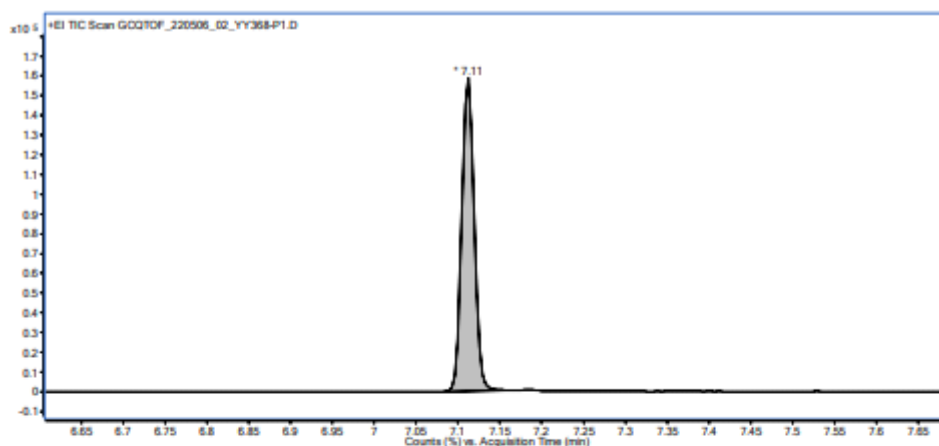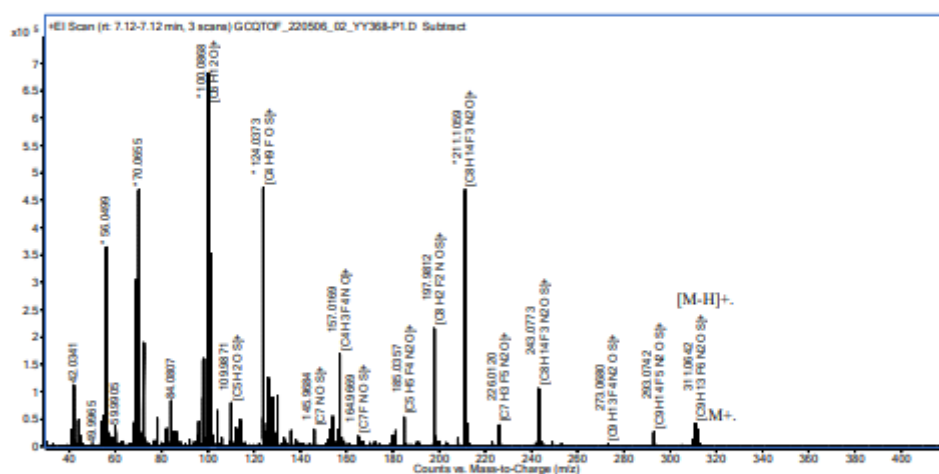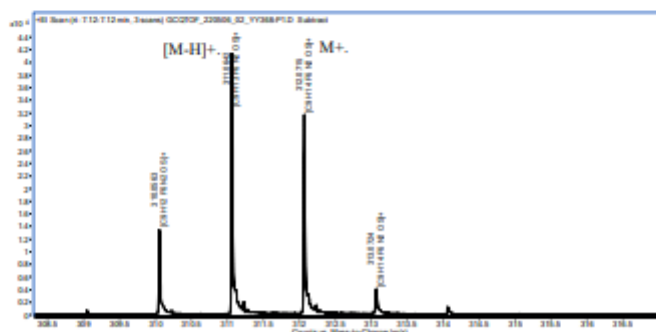

| m/z      | Ion Formula | Sum Formula | m/z (Calc) | Diff (ppm) |                    |
|----------|-------------|-------------|------------|------------|--------------------|
| 311.0642 | C9H13F6N2O5 | C9H14F6N2O5 | 311.0647   | -1.6       | [M-H] <sup>+</sup> |
| 312.0715 | C9H14F6N2O5 |             | 312.0726   | -3.5       | [M] <sup>+</sup>   |

### N-(2,4-dimethoxyphenyl)-N,S-bis(trifluoromethyl)thiohydroxylamine (3j)

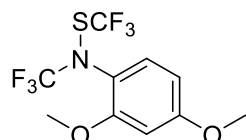

The compound **3j** was obtained as a colorless oil in 70% yield using 1-isothiocyanato-2,4-dimethoxybenzene following the general procedure F after column chromatography on silica gel with pentane.

$^1\text{H}$  NMR (300 MHz, Chloroform-*d*)  $\delta$  7.23 (d,  $J = 7.8$  Hz, 1H), 6.48 (d,  $J = 2.6$  Hz, 1H), 6.43 (dd,  $J = 8.7, 2.7$  Hz, 1H), 3.85 (s, 3H), 3.81 (s, 3H).

$^{19}\text{F}$  NMR (282 MHz, Chloroform-*d*)  $\delta$  -52.40, -58.01 (q,  $J = 3.4$  Hz).

$^{13}\text{C}\{^1\text{H}\}$  NMR (75 MHz, Chloroform-*d*)  $\delta$  161.4, 156.7, 130.8, 129.1 (q,  $J = 314.7$  Hz), 123.2, 122.1 (q,  $J = 260.1$  Hz), 104.1, 99.5, 55.8, 55.5.

HRMS (EI) calculated for  $\text{C}_{10}\text{H}_9\text{F}_6\text{NO}_2\text{S}$ : 321.0253  $[\text{M}]^+$ , Found: 321.0248.

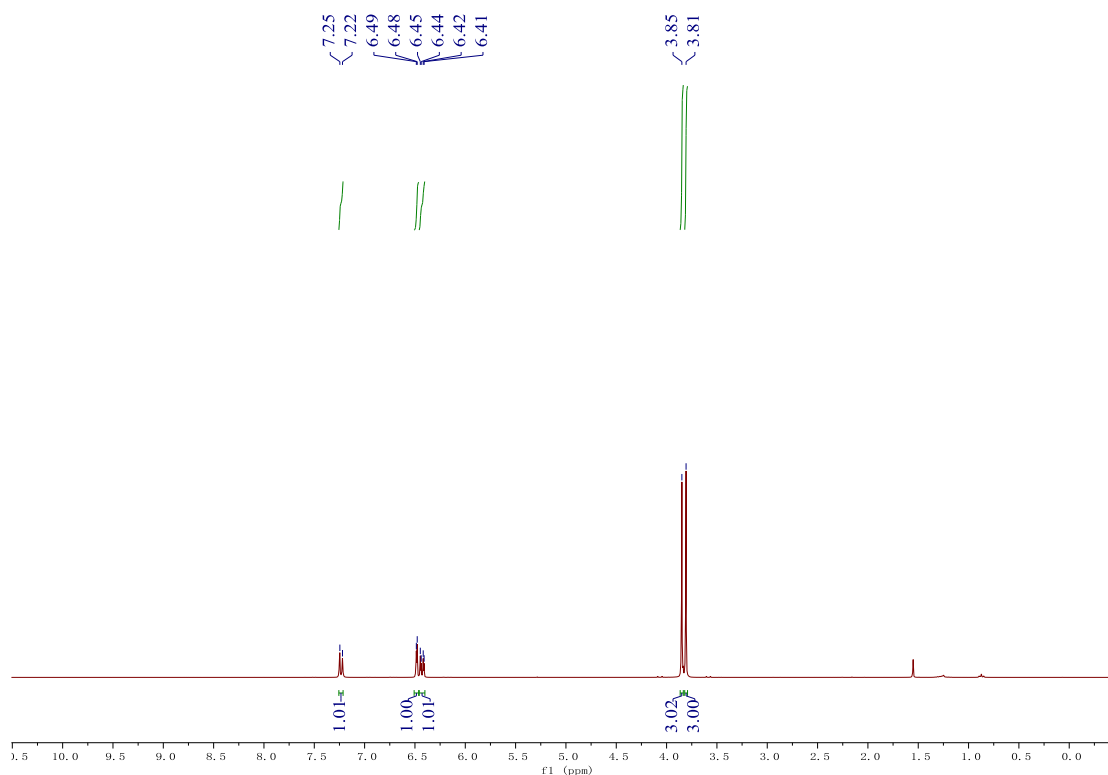



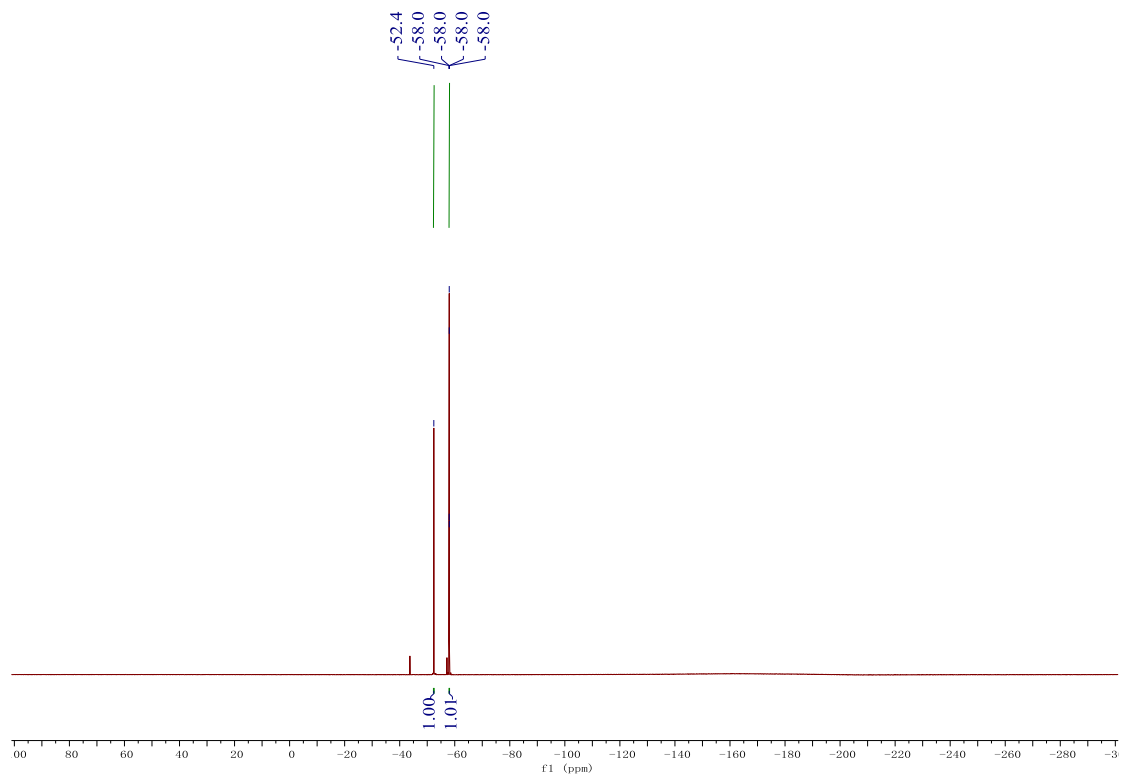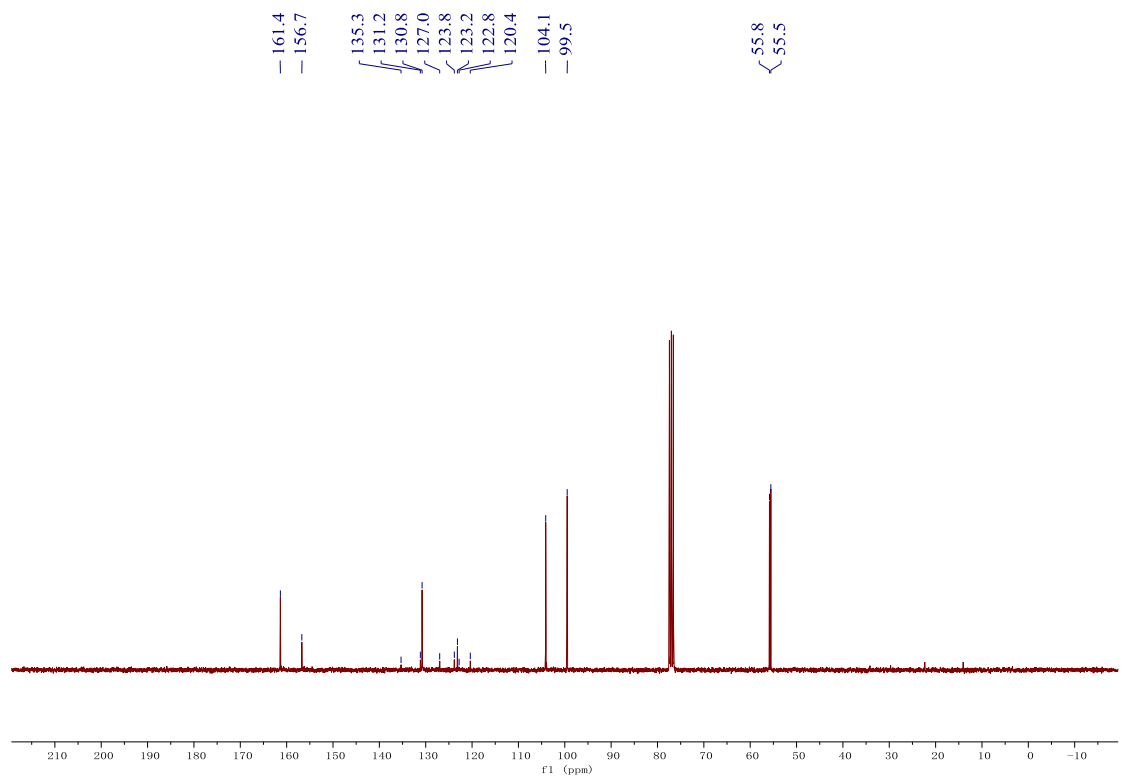

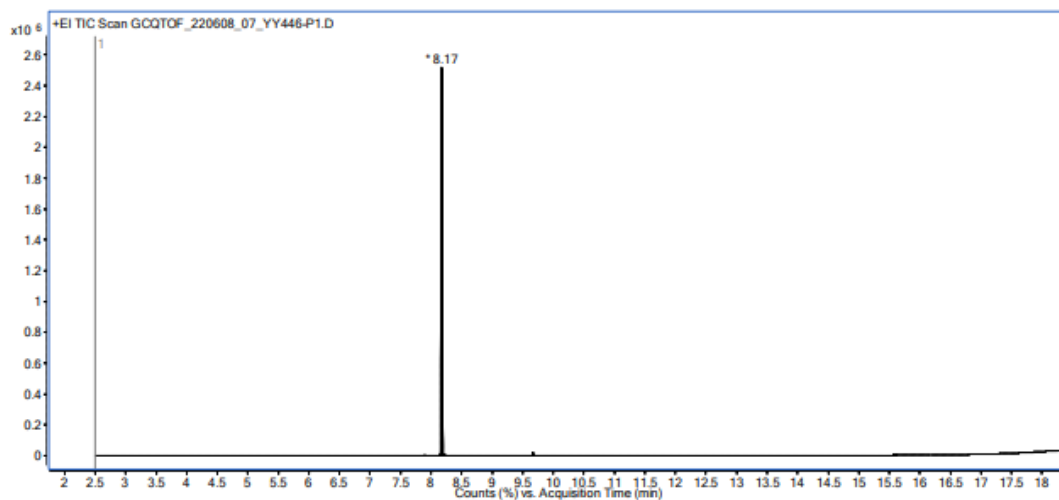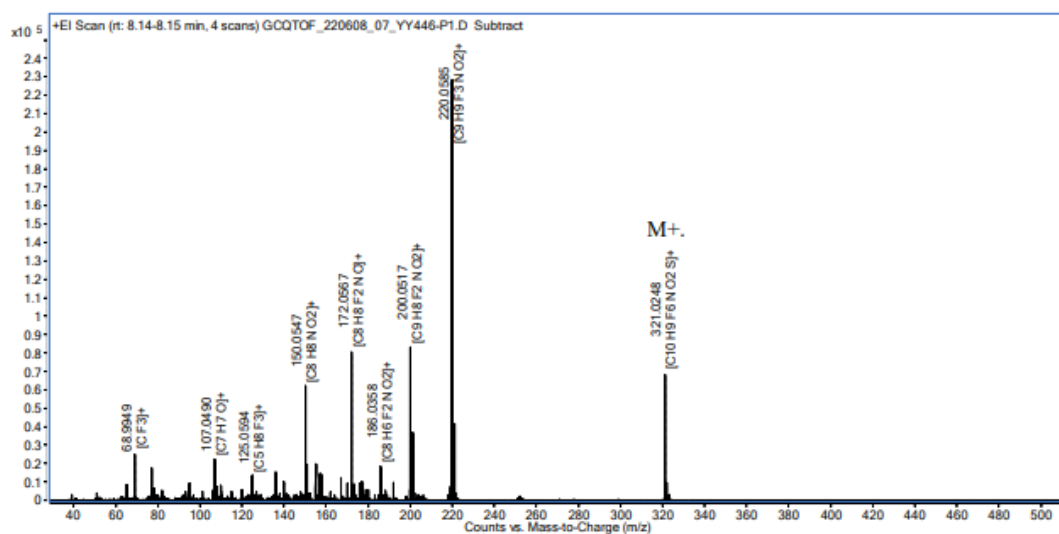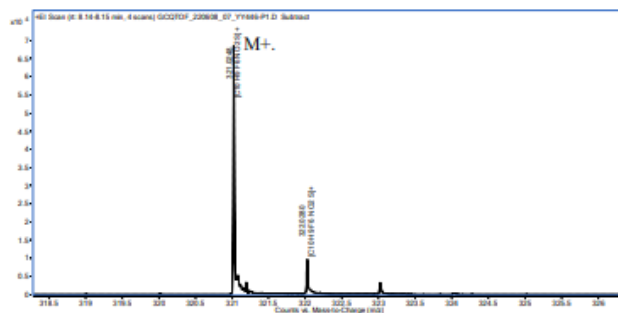

| Meas. m/z | Ion Formula | m/z (Calc) | err (ppm) |                  |
|-----------|-------------|------------|-----------|------------------|
| 321.0248  | C10H9F6NO2S | 321.0253   | -1.6      | [M] <sup>+</sup> |

### N-(3,4-dimethoxyphenyl)-N,S-bis(trifluoromethyl)thiohydroxylamine (3k)

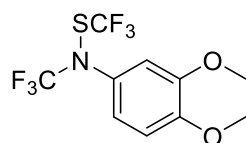

The compound **31'** was obtained as a colorless oil in 73% yield using 4-isothiocyanato-1,2-dimethoxybenzene following the general procedure F after column chromatography on silica gel with pentane.

$^1\text{H}$  NMR (300 MHz, Chloroform-*d*)  $\delta$  6.95 – 6.91 (m, 1H), 6.86 – 6.79 (m, 2H), 3.89 (s, 3H), 3.88 (s, 3H).

$^{19}\text{F}$  NMR (282 MHz, Chloroform-*d*)  $\delta$  -51.7 (q,  $J = 3.4$  Hz), -57.0 (q,  $J = 3.4$  Hz).

$^{13}\text{C}\{^1\text{H}\}$  NMR (75 MHz, Chloroform-*d*)  $\delta$  149.5, 149.3, 134.8, 128.6 (q,  $J = 315.5$  Hz), 122.1 (q,  $J = 259.9$  Hz), 120.1, 110.9, 110.9, 56.0, 56.0.

HRMS (EI) calculated for  $\text{C}_{10}\text{H}_9\text{F}_6\text{NO}_2\text{S}$ : 321.0253  $[\text{M}]^+$ , Found: 321.0255.

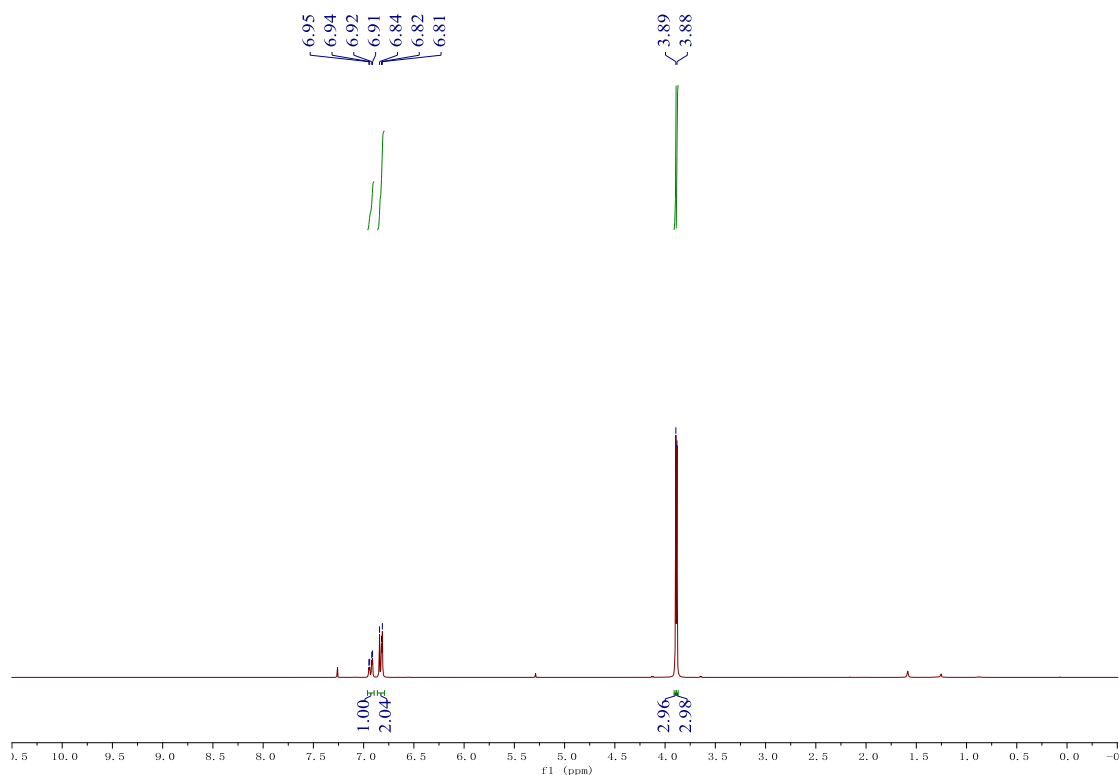

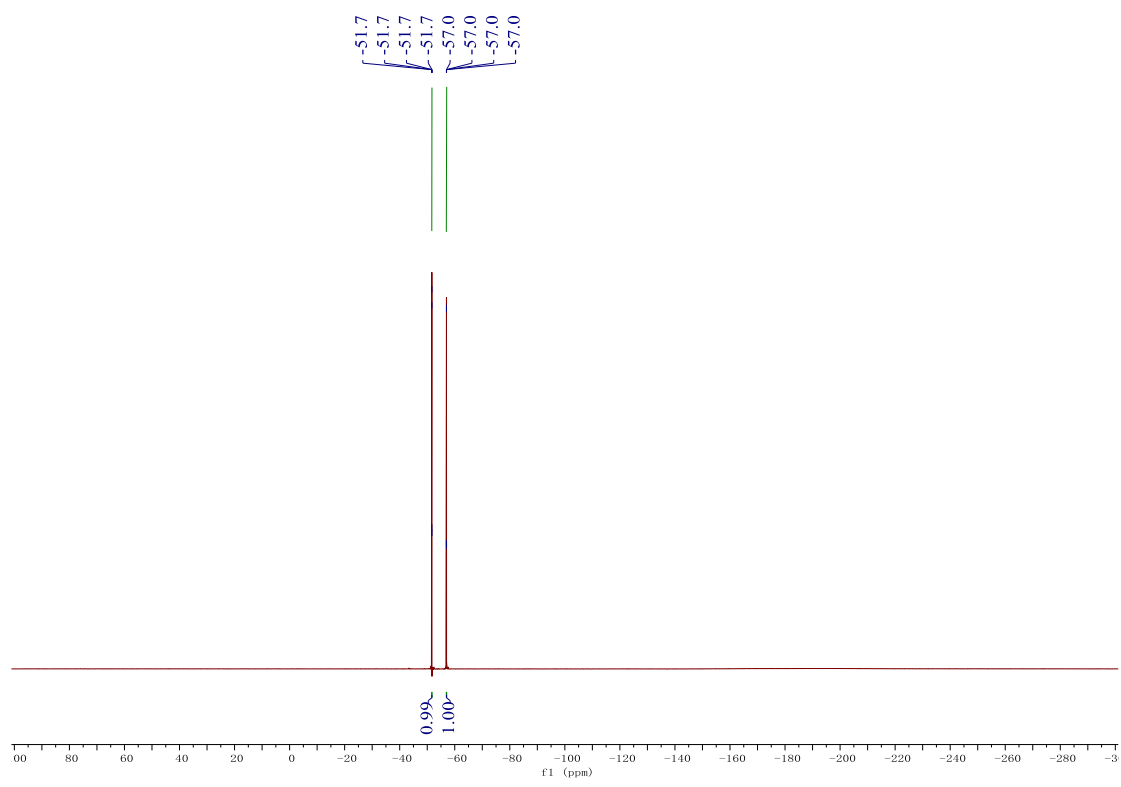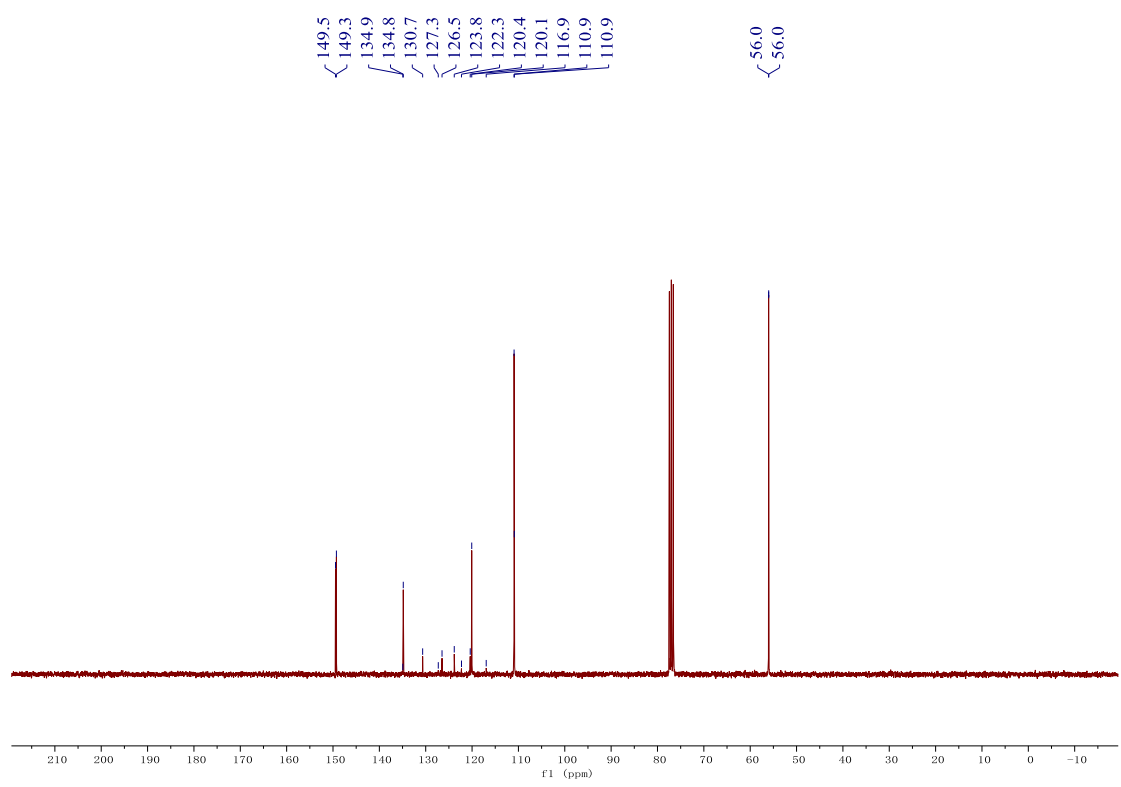

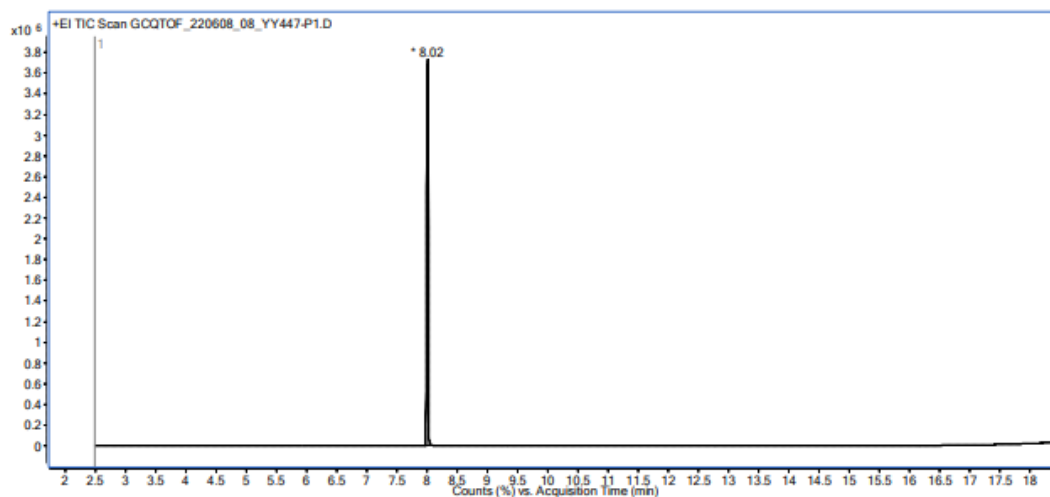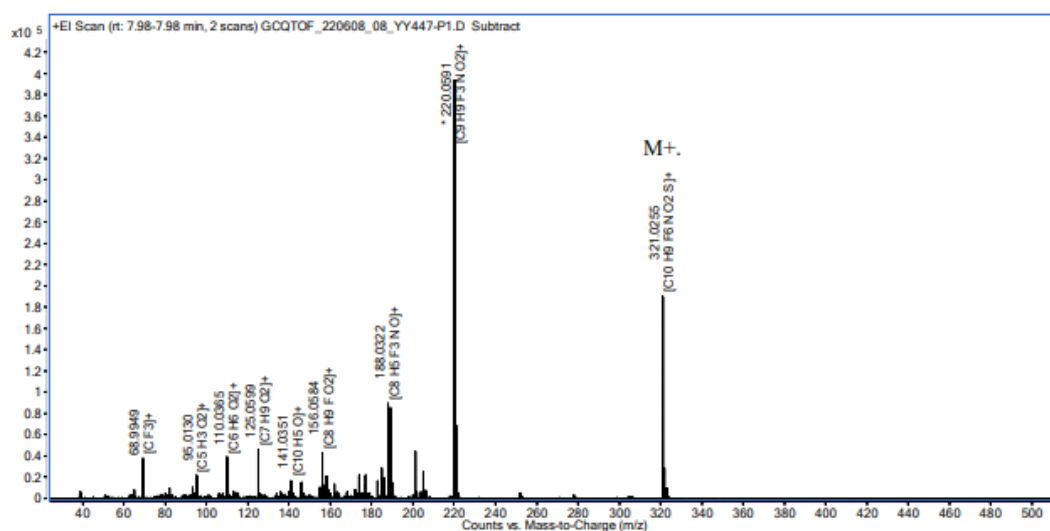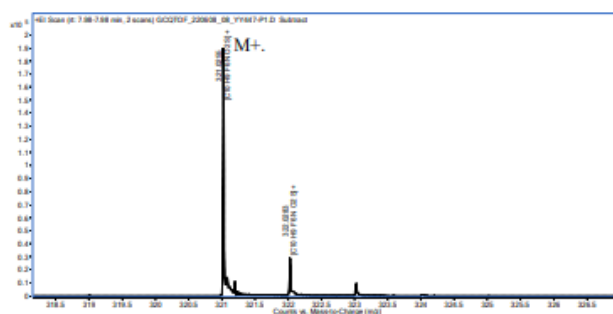

| Meas. m/z | Ion Formula | m/z (Calc) | err (ppm) |                  |
|-----------|-------------|------------|-----------|------------------|
| 321.0255  | C10H9F6NO2S | 321.0253   | 0.6       | [M] <sup>+</sup> |

### N-(benzo[d][1,3]dioxol-5-yl)-N,S-bis(trifluoromethyl)thiohydroxylamine (**3I**)

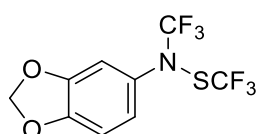

The compound **3I** was obtained as a colorless oil in 65% yield using 5-isothiocyanatobenzo[d][1,3]dioxole following the general procedure E after column chromatography on silica gel with pentane.

$^1\text{H}$  NMR (300 MHz, Chloroform-*d*)  $\delta$  6.90 – 6.72 (m, 3H), 6.03 (s, 2H).

$^{19}\text{F}$  NMR (282 MHz, Chloroform-*d*)  $\delta$  -51.6 (q,  $J = 3.4$  Hz), -57.2 (q,  $J = 3.4$  Hz).

$^{13}\text{C}\{^1\text{H}\}$  NMR (75 MHz, Chloroform-*d*)  $\delta$  148.1, 148.0, 135.7, 128.5 (q,  $J = 315.6$  Hz), 122.0 (q,  $J = 260.9$  Hz), 121.6, 108.7, 108.3, 102.0.

HRMS (EI) calculated for  $\text{C}_9\text{H}_5\text{F}_6\text{NO}_2\text{S}$ : 304.9940  $[\text{M}]^+$ , Found: 304.9946.

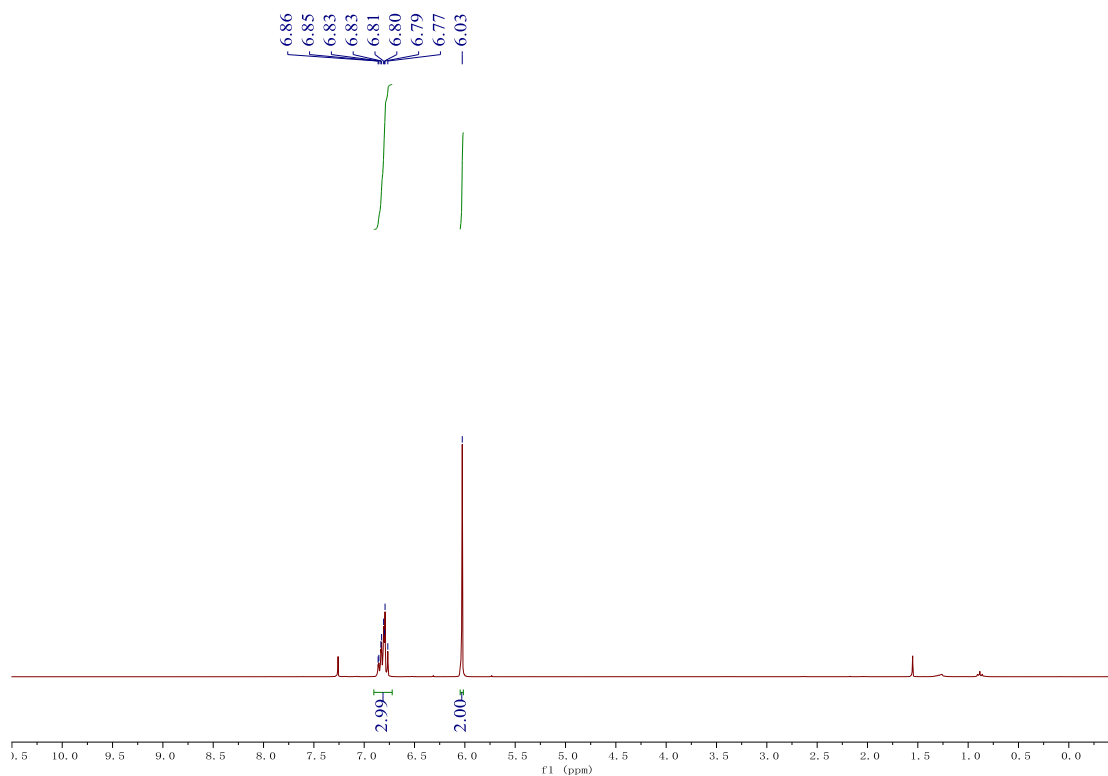

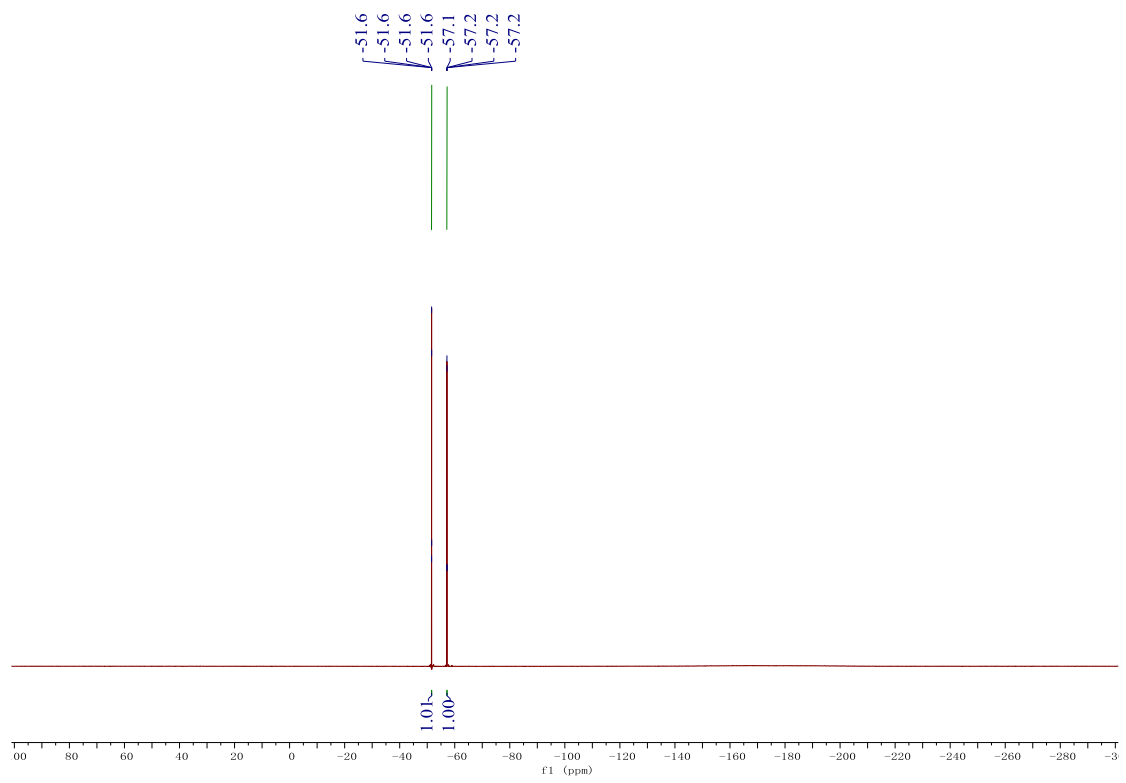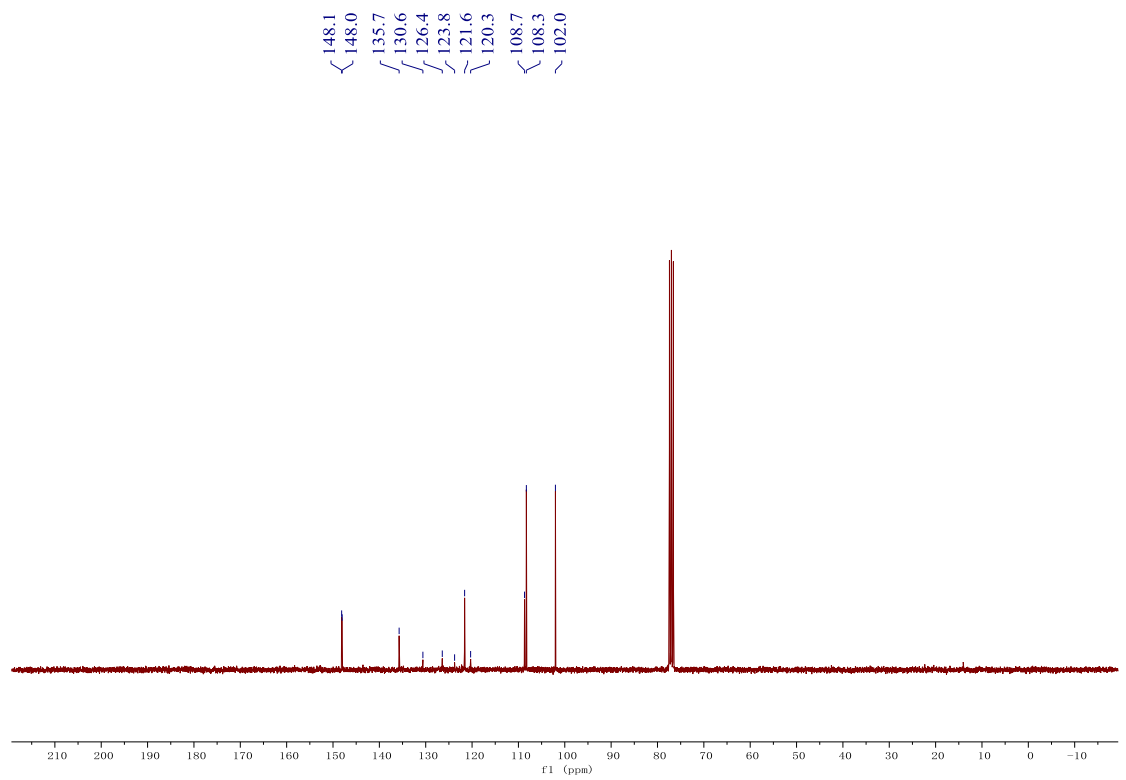

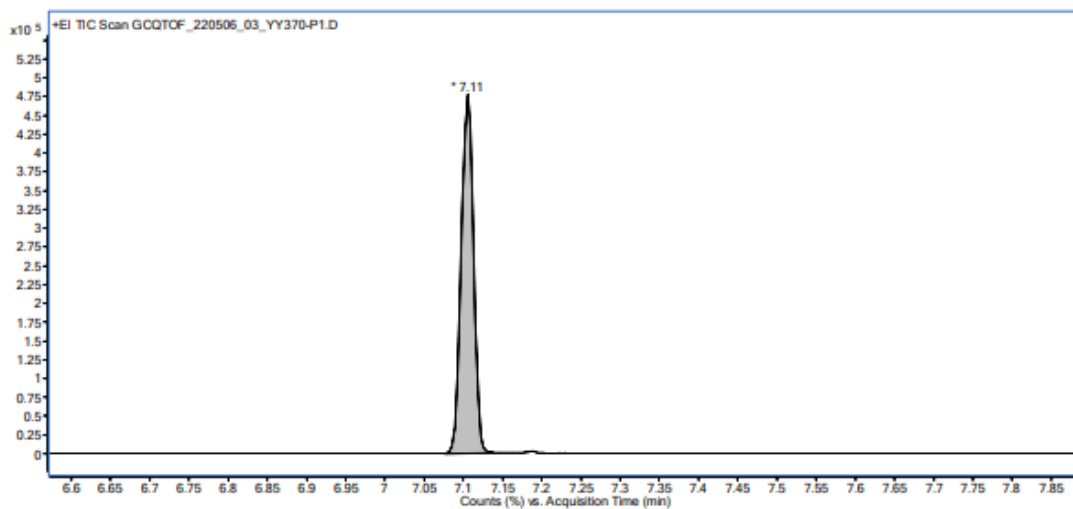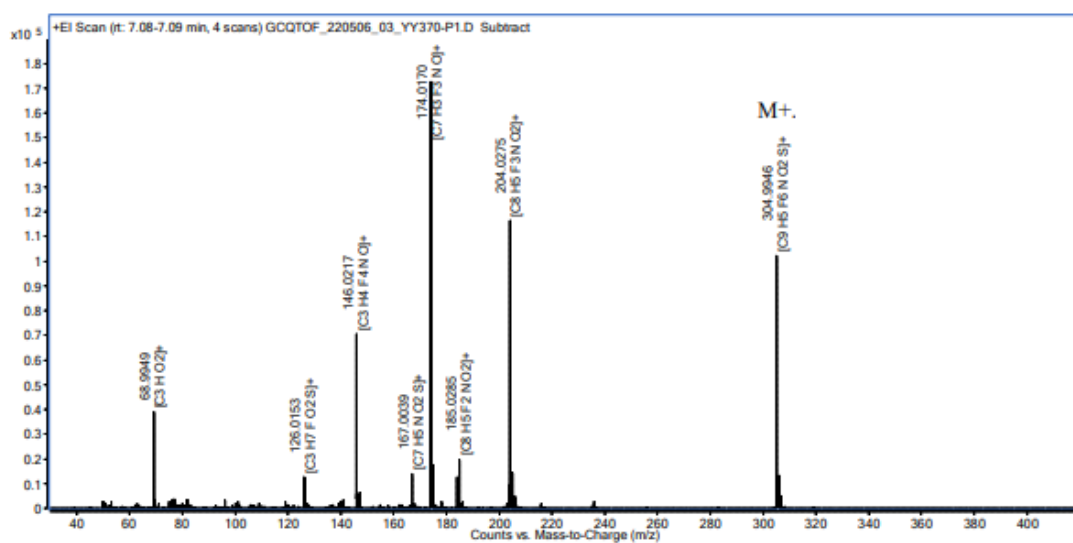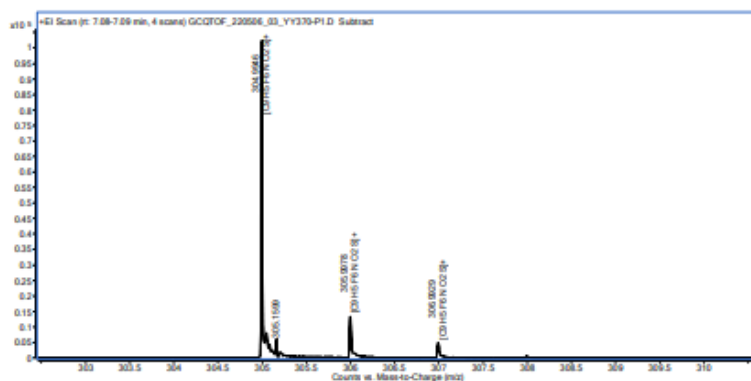

| m/z      | Formula (M) | m/z (Calc) | Diff (ppm) | [M] <sup>+</sup> |
|----------|-------------|------------|------------|------------------|
| 304.9946 | C9H5F6NO2S  | 304.9940   | 2.0        | [M] <sup>+</sup> |

**N-(4-(benzyloxy)phenyl)-N,S-bis(trifluoromethyl)thiohydroxylamine (3m)**

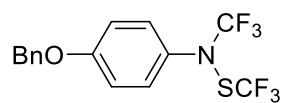

The compound **3h** was obtained as a white solid in 57% yield using 1-(benzyloxy)-4-



isothiocyanatobenzene following the general procedure E after column chromatography on silica gel with pentane.

$^1\text{H}$  NMR (300 MHz, Chloroform-*d*)  $\delta$  7.41 – 7.23 (m, 5H), 7.22 – 7.12 (m, 2H), 6.92 – 6.84 (m, 2H), 4.98 (s, 2H).

$^{19}\text{F}$  NMR (282 MHz, Chloroform-*d*)  $\delta$  -51.7 (q,  $J = 3.4$  Hz), -57.0 (q,  $J = 3.4$  Hz).

$^{13}\text{C}\{^1\text{H}\}$  NMR (75 MHz, Chloroform-*d*)  $\delta$  158.9, 136.4, 135.0, 129.0, 128.7, 128.6 (q,  $J = 315.7$  Hz), 128.2, 127.5, 122.1 (q,  $J = 259.9$  Hz), 115.5, 70.3.

HRMS (EI) calculated for  $\text{C}_{15}\text{H}_{11}\text{F}_6\text{NOS}$ : 367.0460  $[\text{M}]^+$ , Found: 367.0457.

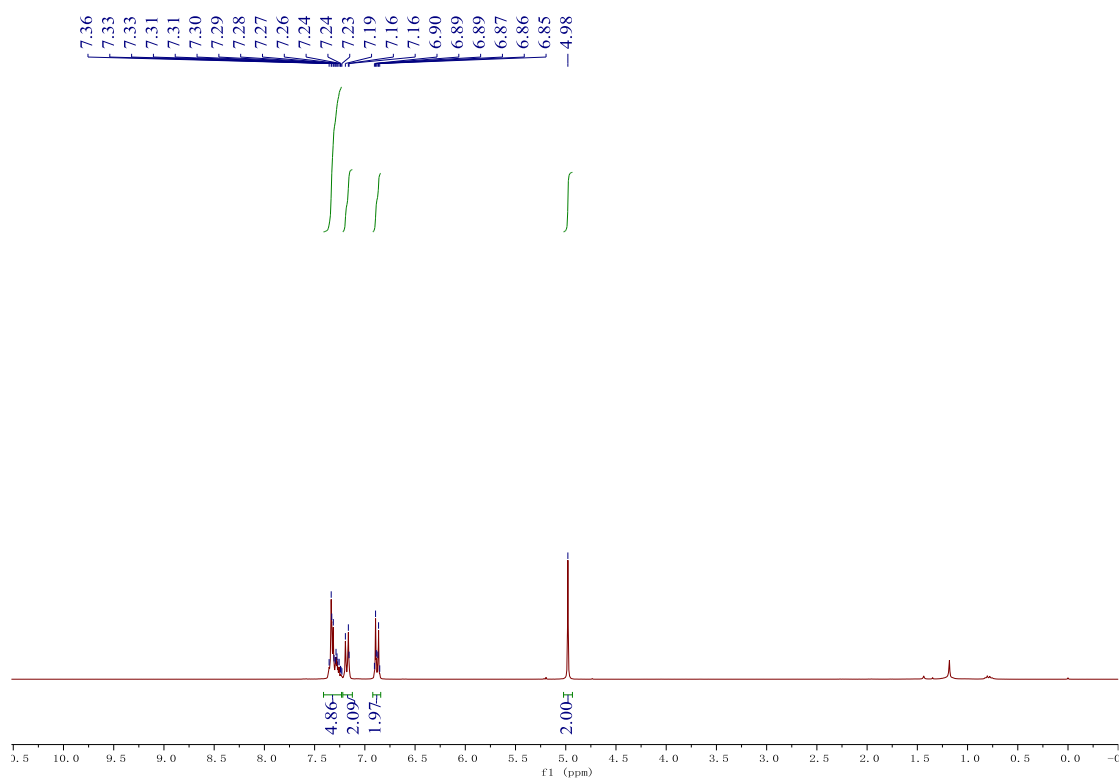

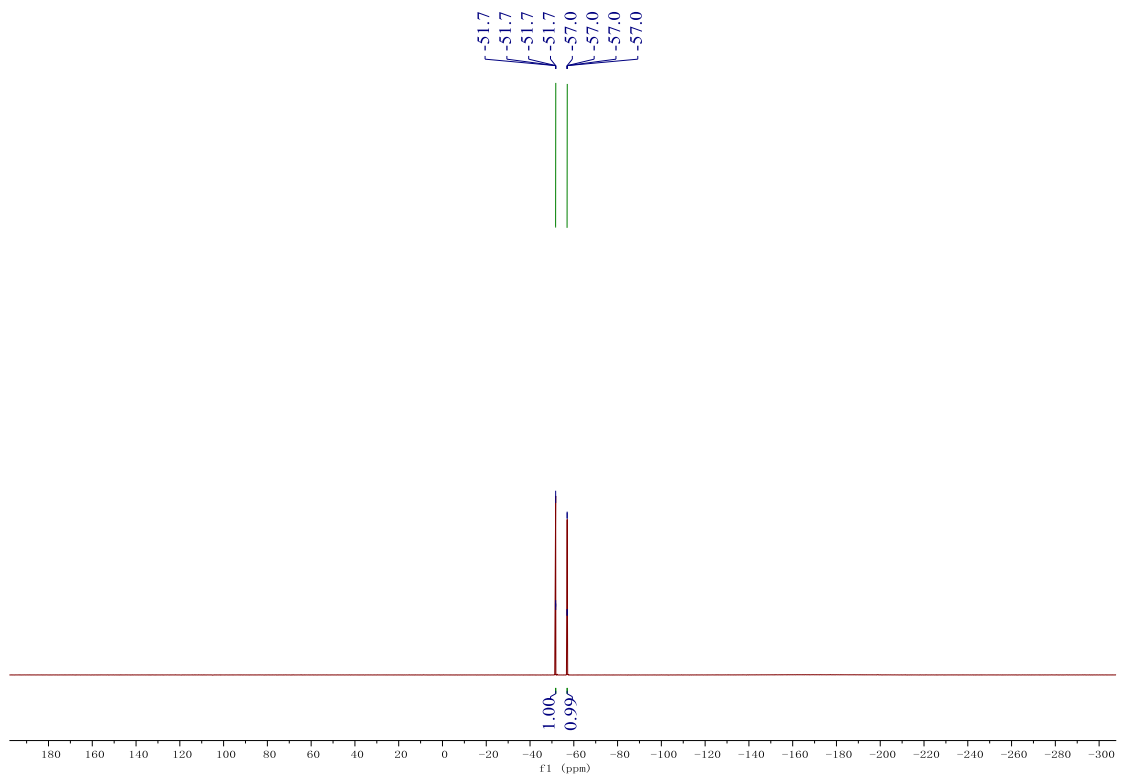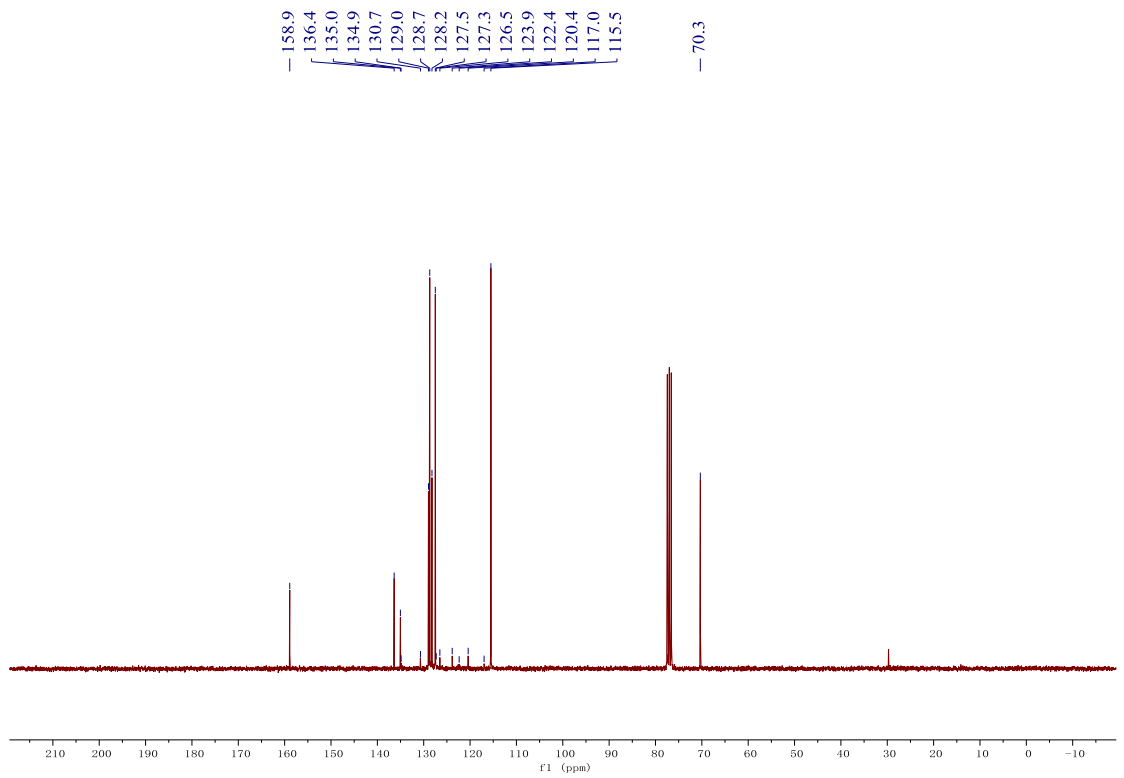

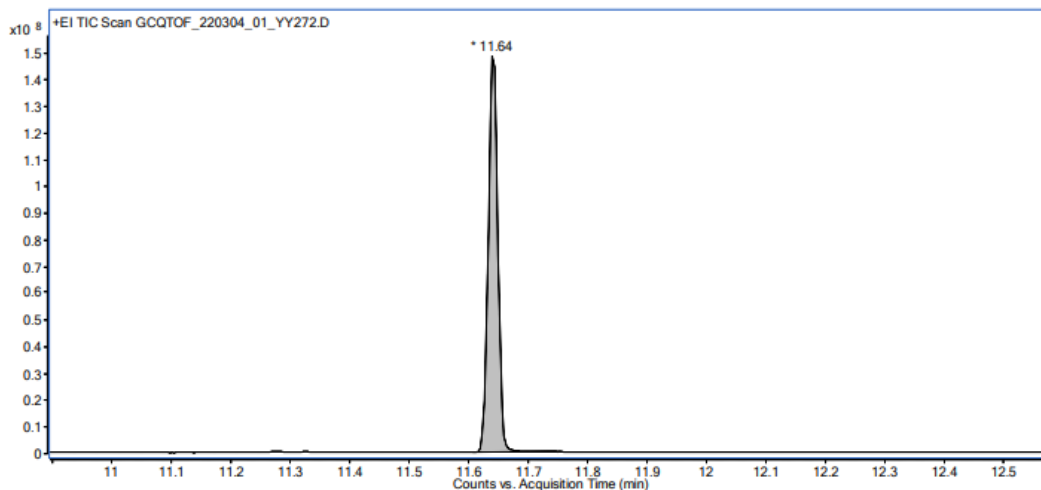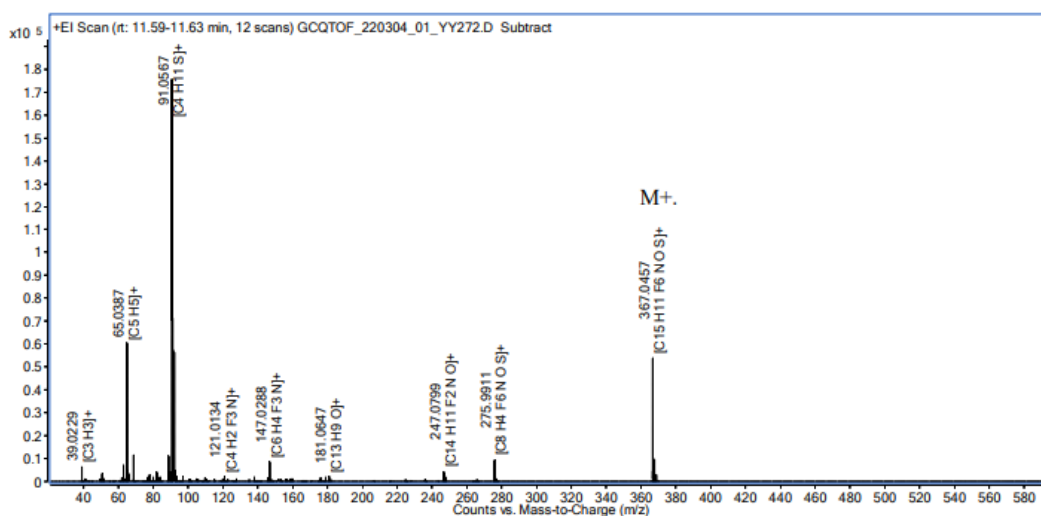

| m/z      | Formula (M) | m/z (Calc) | Diff (ppm) | [M] <sup>+</sup> |
|----------|-------------|------------|------------|------------------|
| 367.0457 | C15H11F6NOS | 367.0460   | -0.8       | [M] <sup>+</sup> |

### N-(4-morpholinophenyl)-N,S-bis(trifluoromethyl)thiohydroxylamine (30)

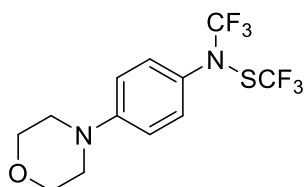

The compound **30** was obtained as a colorless oil in 78% yield using 4-(4-isothiocyanatophenyl)morpholine following the general procedure E after column chromatography on silica gel with toluene.

<sup>1</sup>H NMR (300 MHz, Chloroform-*d*) δ 7.18 – 7.11 (m, 2H), 6.82 – 6.75 (m, 2H), 3.82 – 3.72 (m, 4H), 3.15 – 3.06 (m, 4H).

$^{19}\text{F}$  NMR (282 MHz, Chloroform-*d*)  $\delta$  -51.8 (q,  $J = 3.4$  Hz), -57.0 (q,  $J = 3.4$  Hz).

$^{13}\text{C}\{^1\text{H}\}$  NMR (75 MHz, Chloroform-*d*)  $\delta$  151.2, 133.6, 128.5 (q,  $J = 315.2$  Hz), 128.5, 122.2 (q,  $J = 259.9$  Hz), 115.5, 66.7, 48.6.

HRMS (EI) calculated for  $\text{C}_{12}\text{H}_{12}\text{F}_6\text{N}_2\text{OS}$ : 346.0569  $[\text{M}]^+$ , Found: 346.0567.

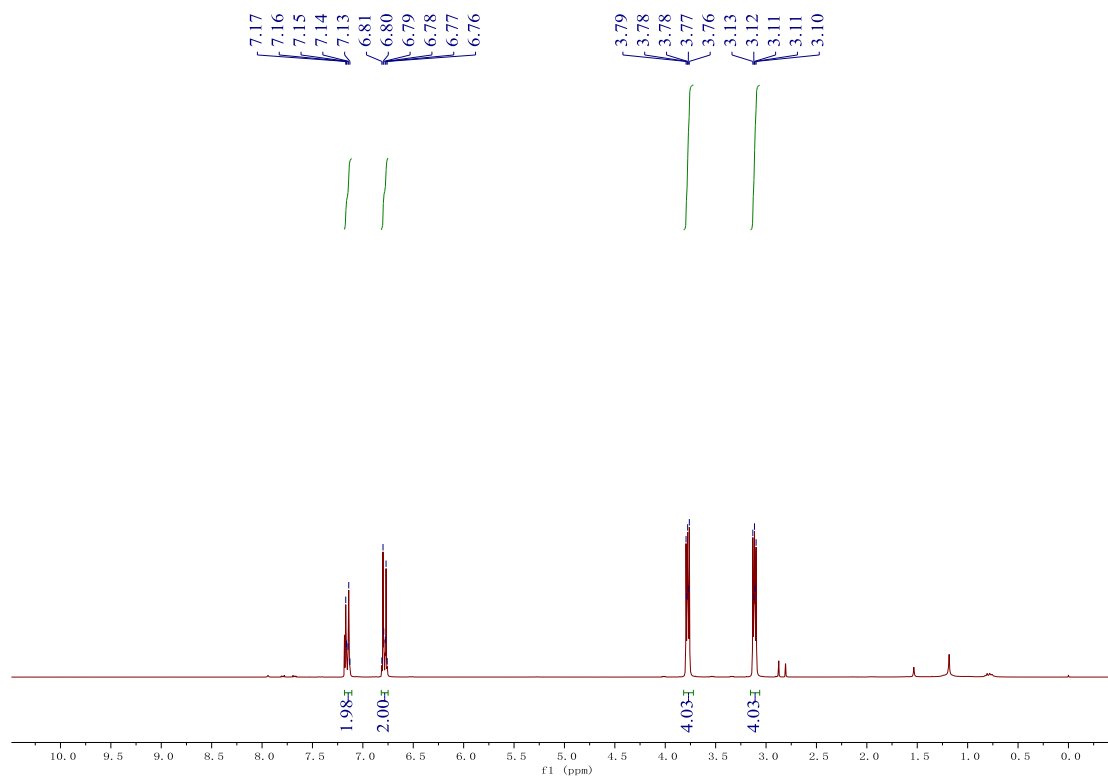

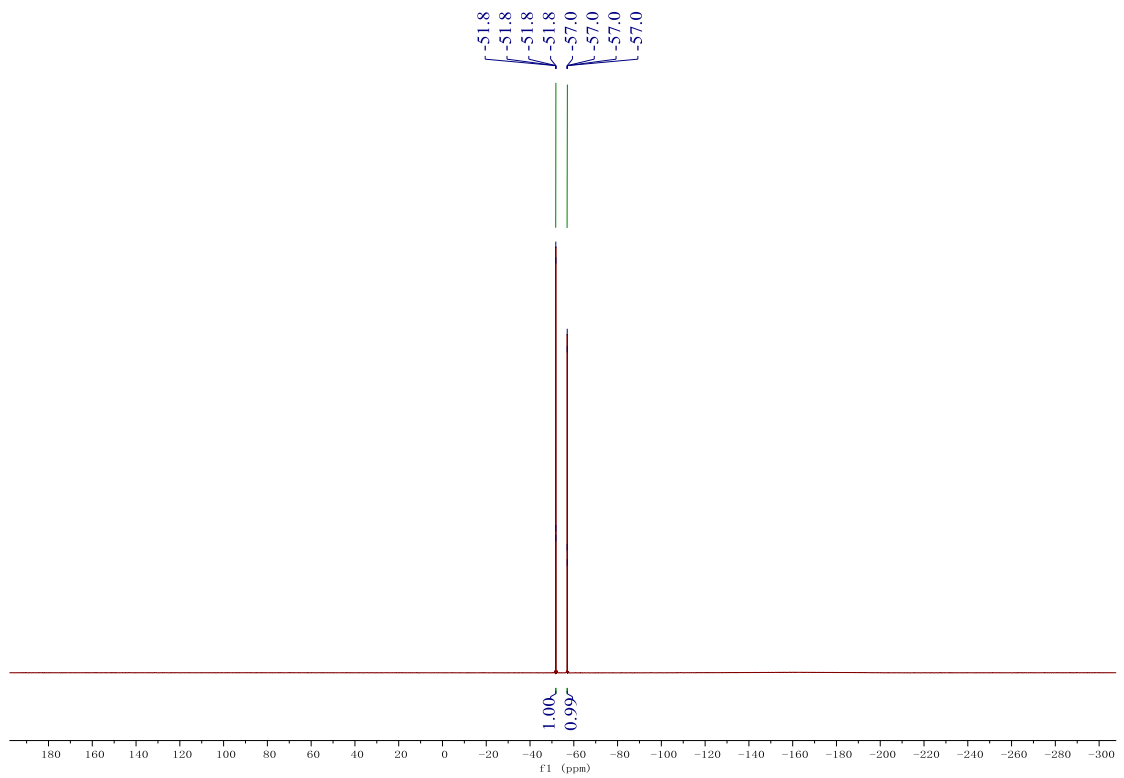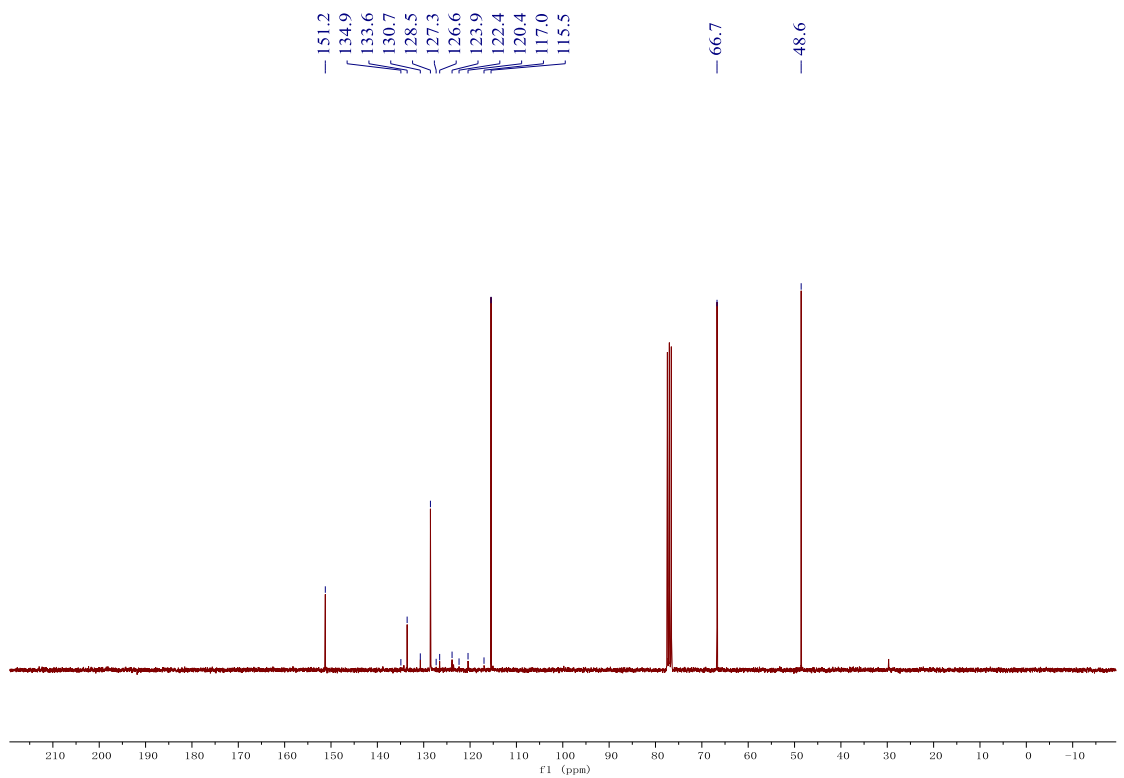

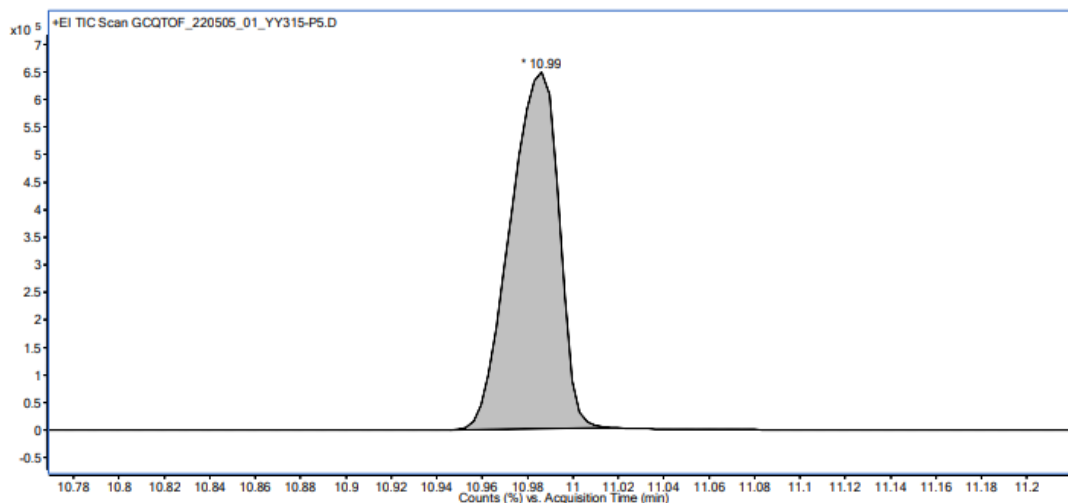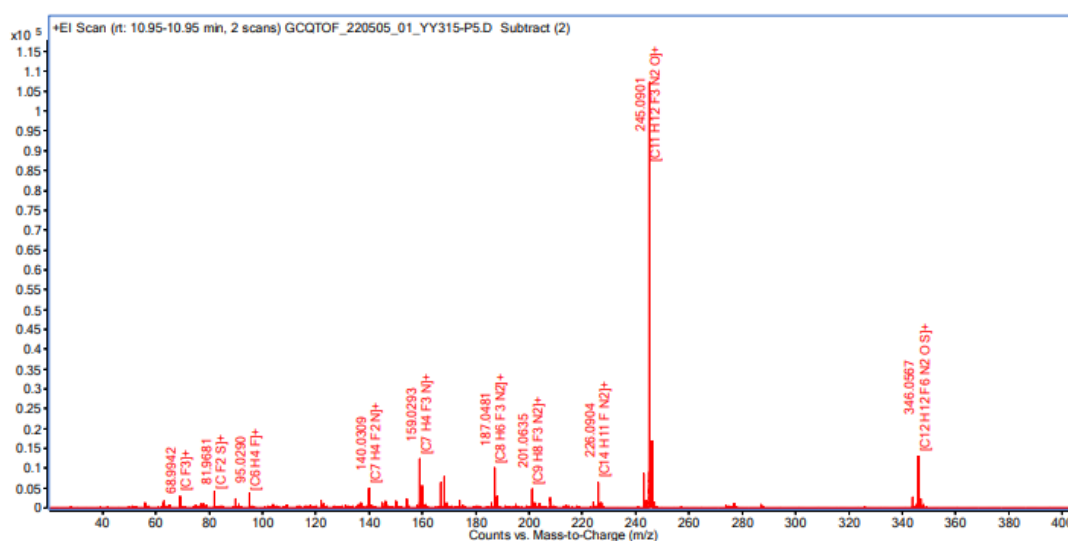

| m/z      | Formula (M)  | m/z (Calc) | Diff (ppm) | [M] <sup>+</sup> |
|----------|--------------|------------|------------|------------------|
| 346.0567 | C12H12F6N2OS | 346.0569   | -0.6       | [M] <sup>+</sup> |

### N-(4-((1*s*,4*r*)-4-hexylcyclohexyl)phenyl)-N,S-bis(trifluoromethyl)thiohydroxylamine (**3p**)

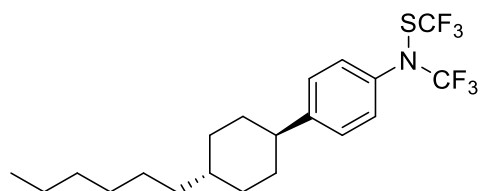

The compound **3p** was obtained as a colorless oil in 36% yield using 1-((1*s*,4*r*)-4-hexylcyclohexyl)-4-isothiocyanatobenzene following the general procedure E after column chromatography on silica gel with cyclohexane.

<sup>1</sup>H NMR (300 MHz, Chloroform-*d*) δ 7.30 – 7.22 (m, 4H), 2.51 (tt, *J* = 12.2, 3.2 Hz, 1H), 1.91 (d, *J* = 10.6 Hz, 4H), 1.53 – 1.38 (m, 2H), 1.37 – 1.26 (m, 11H), 1.15 – 1.01 (m, 2H), 0.96 – 0.89 (m, 3H).

$^{19}\text{F}$  NMR (282 MHz, Chloroform-*d*)  $\delta$  -51.7 (q,  $J = 3.4$  Hz), -56.7 (q,  $J = 3.4$  Hz).

$^{13}\text{C}\{^1\text{H}\}$  NMR (75 MHz, Chloroform-*d*)  $\delta$  148.7, 139.7, 128.6 (q,  $J = 315.9$  Hz), 127.9, 127.0, 122.2 (q,  $J = 260.7$  Hz), 44.2, 37.4, 37.3, 34.2, 33.5, 32.0, 29.7, 26.9, 22.7, 14.1.

HRMS (EI) calculated for  $\text{C}_{20}\text{H}_{27}\text{F}_6\text{NS}$ : 427.1763  $[\text{M}]^+$ , Found: 427.1749.

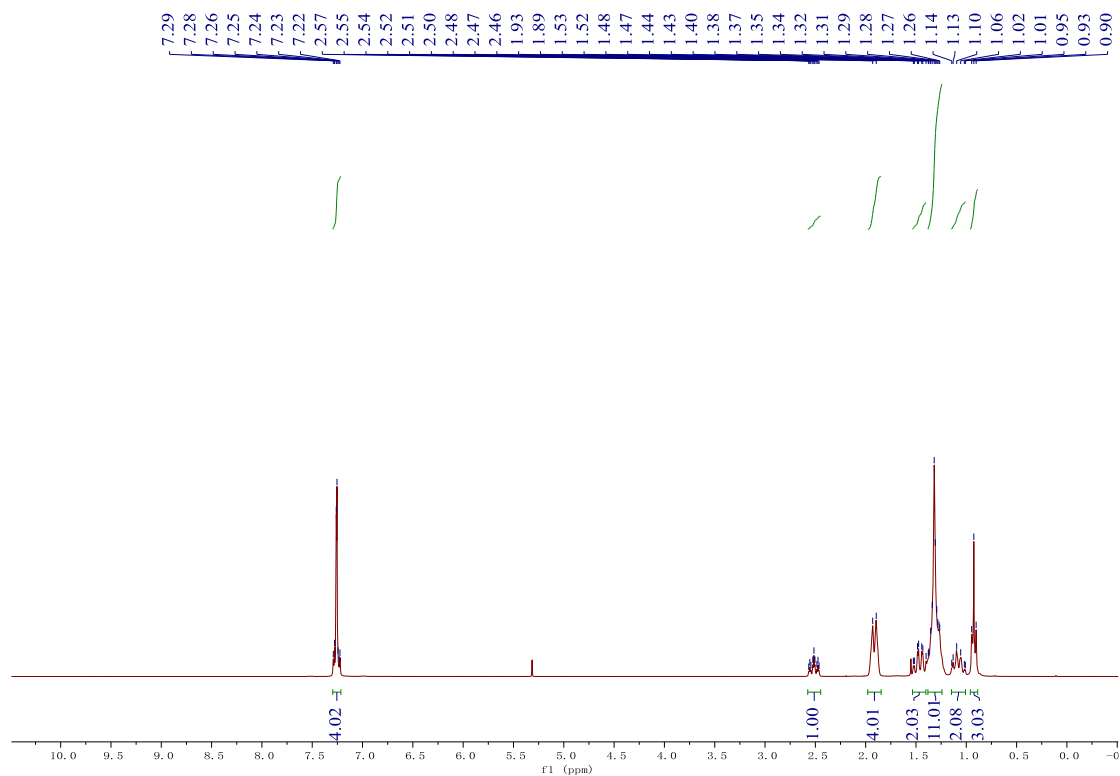

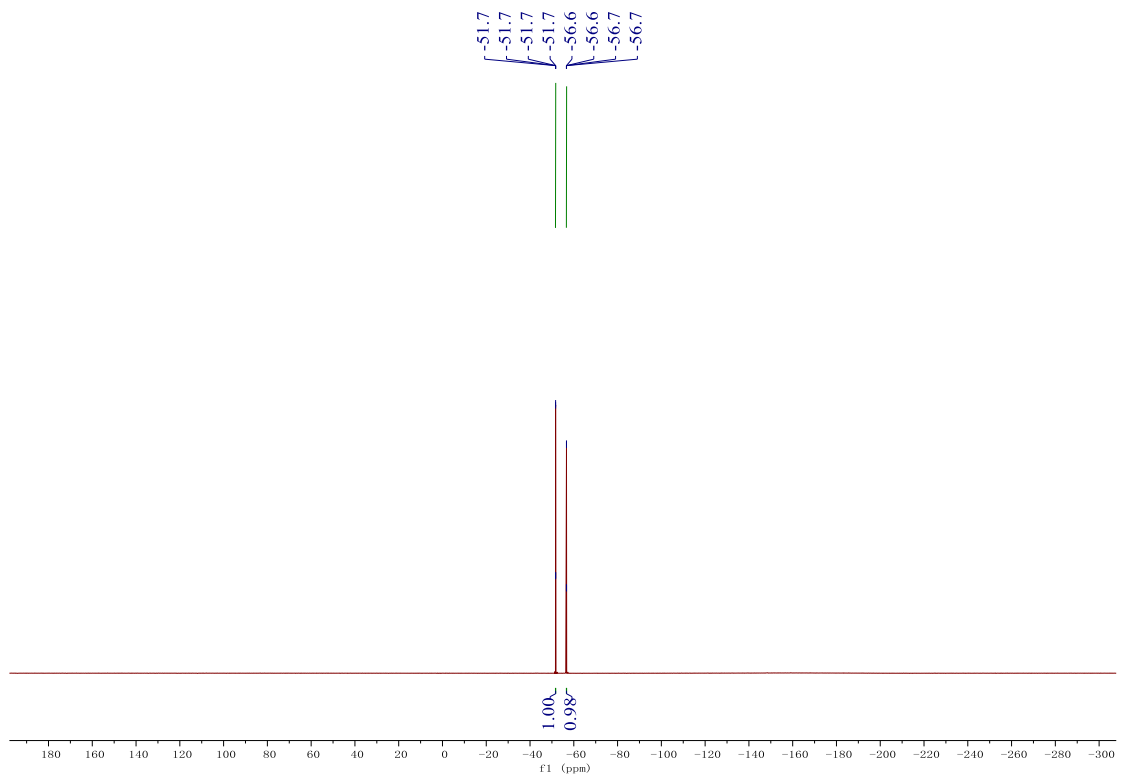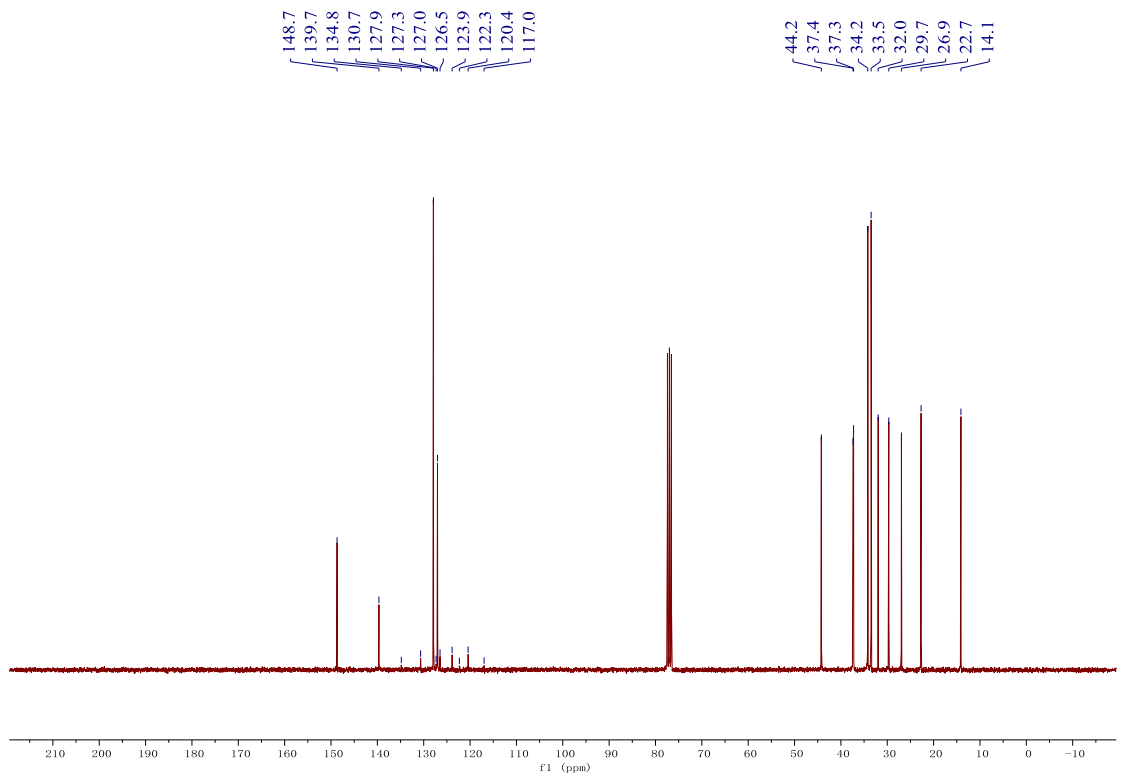



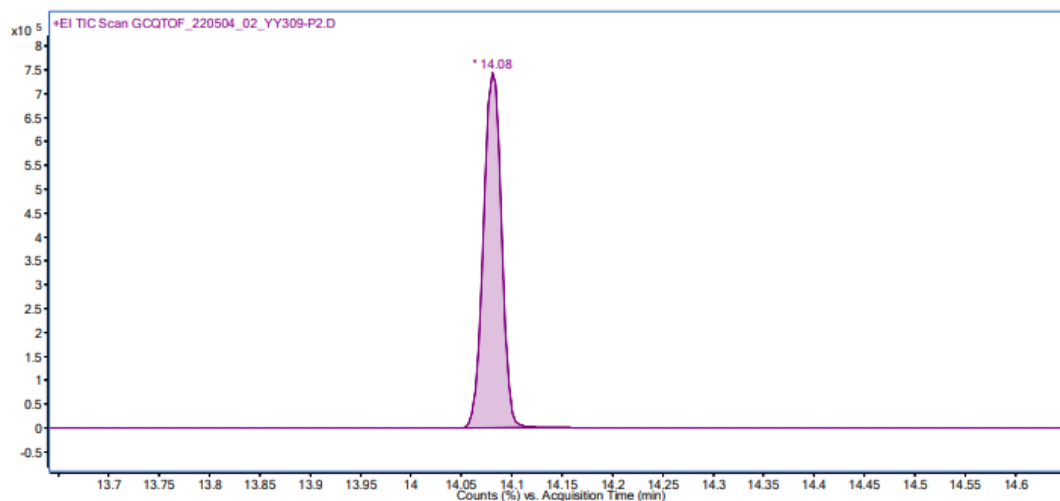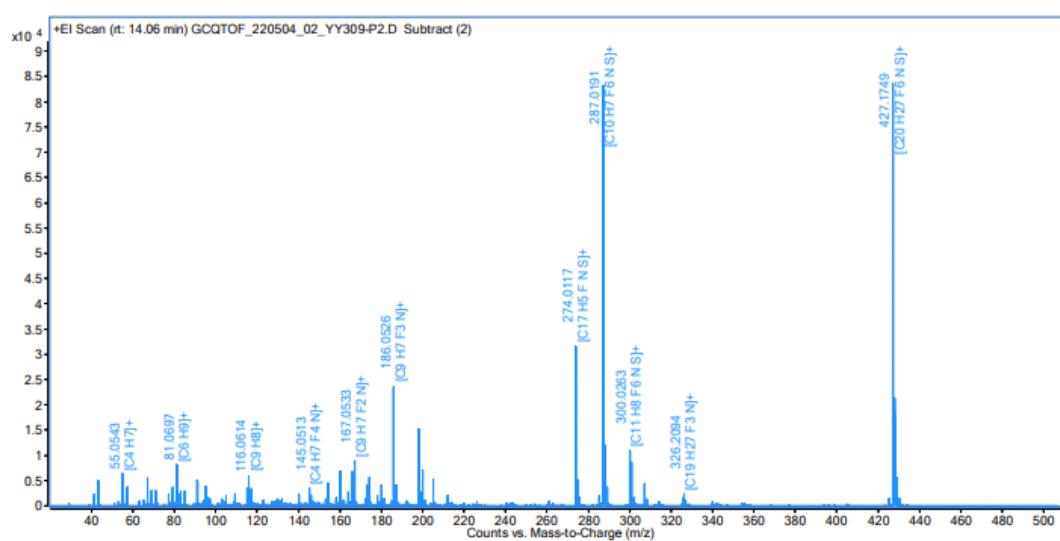

| m/z      | Formula (M) | m/z (Calc) | Diff (ppm) | [M] <sup>+</sup> |
|----------|-------------|------------|------------|------------------|
| 427.1749 | C20H27F6NS  | 427.1763   | -3.3       | [M] <sup>+</sup> |

### N-(9H-fluoren-2-yl)-N,S-bis(trifluoromethyl)thiohydroxylamine (**3q**)

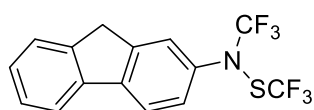

The compound **3q** was obtained as a white solid in 57% yield using 2-isothiocyanato-9H-fluorene following the general procedure E after column chromatography on silica gel with pentane.

<sup>1</sup>H NMR (300 MHz, Chloroform-*d*) δ 7.82 – 7.73 (m, 2H), 7.60 – 7.53 (m, 1H), 7.51 (s, 1H), 7.44 – 7.30 (m, 3H), 3.93 (s, 2H).

<sup>19</sup>F NMR (282 MHz, Chloroform-*d*) δ -51.5 (q, *J* = 3.4 Hz), -56.5 (q, *J* = 3.4 Hz).

<sup>13</sup>C{<sup>1</sup>H} NMR (75 MHz, Chloroform-*d*) δ 144.5, 143.6, 142.3, 140.5, 140.3, 128.6 (d, *J* = 315.8 Hz), 127.4, 127.0, 126.1, 125.1, 124.1, 122.2 (d, *J* = 253.7 Hz), 120.5, 120.3, 36.9.

HRMS (EI) calculated for C<sub>15</sub>H<sub>9</sub>F<sub>6</sub>NS: 349.0354 [M]<sup>+</sup>, Found: 349.0338.

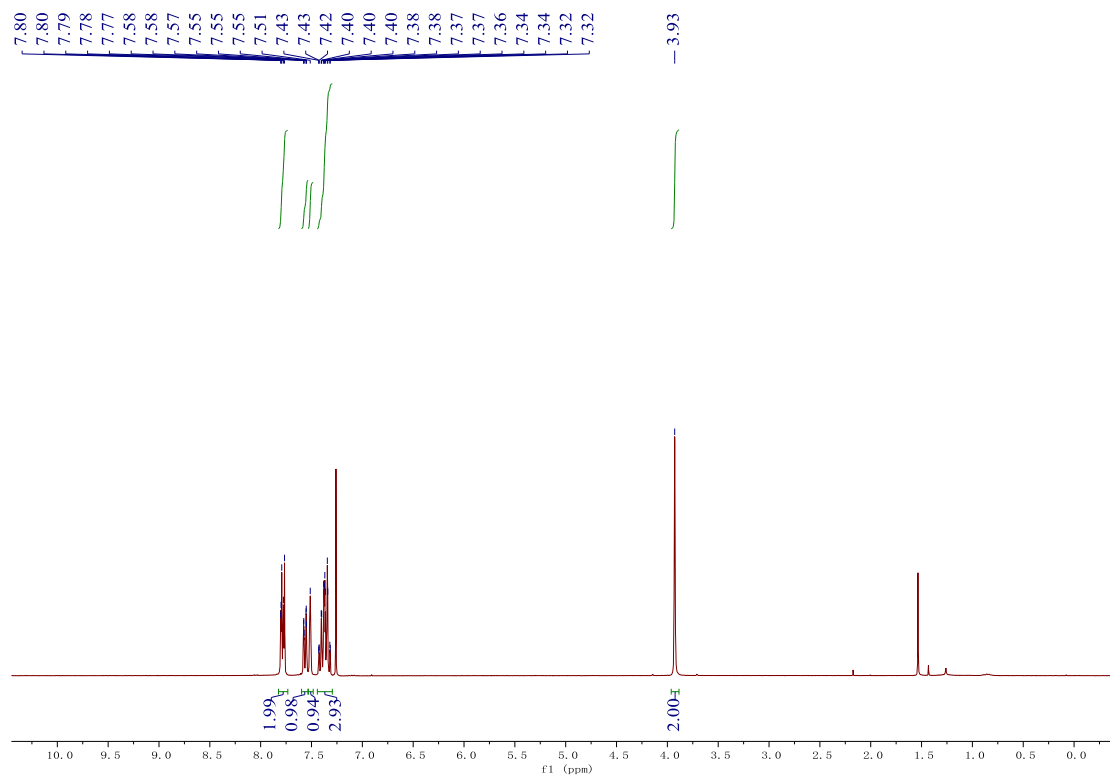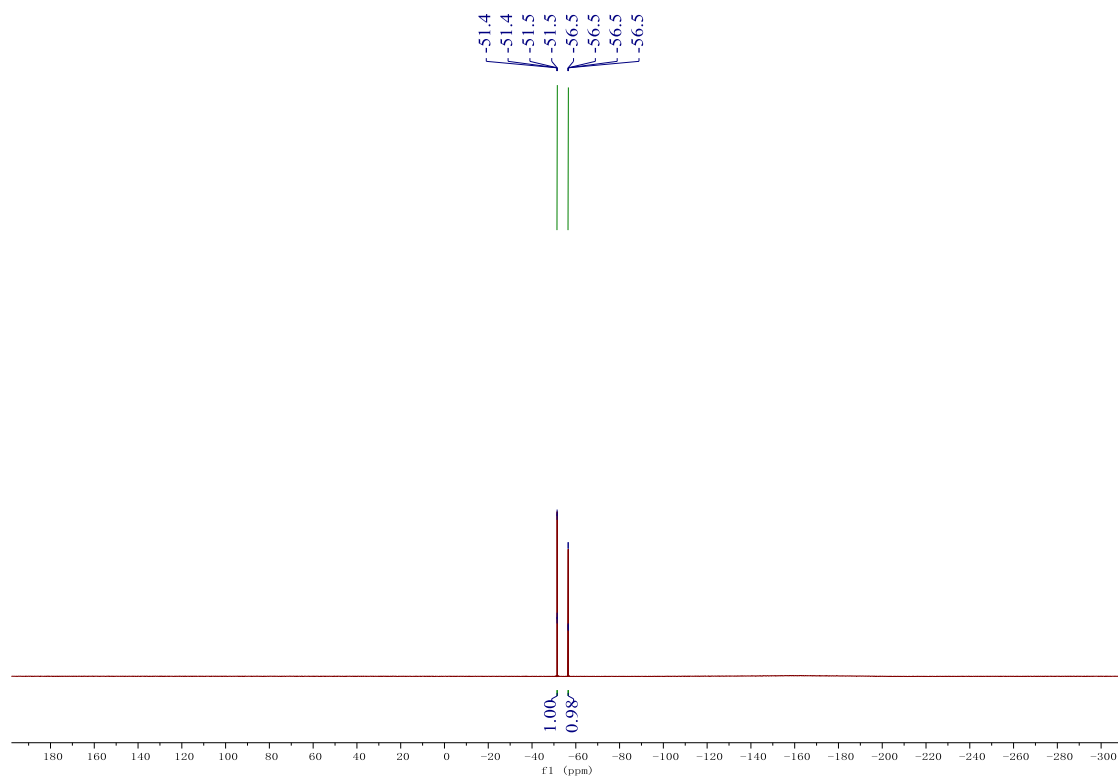

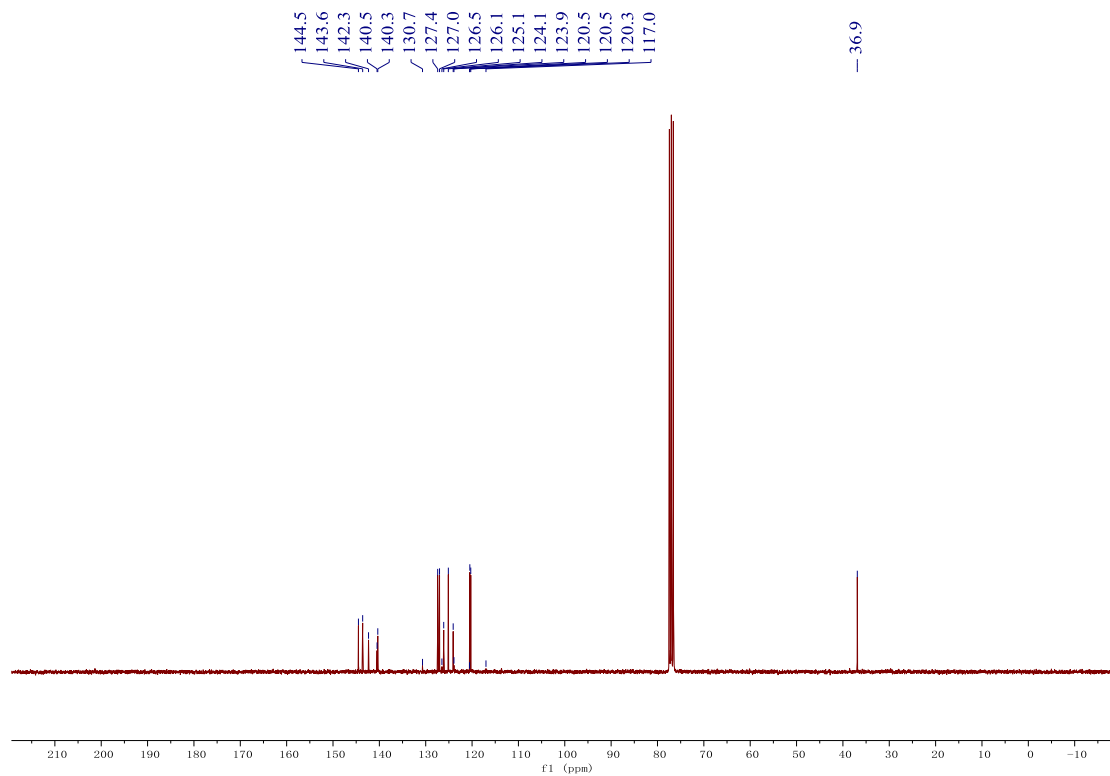

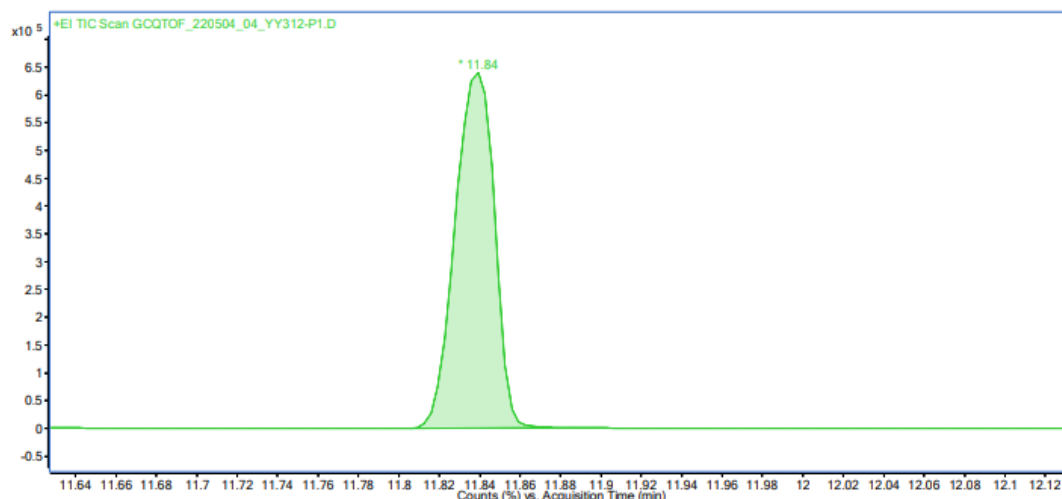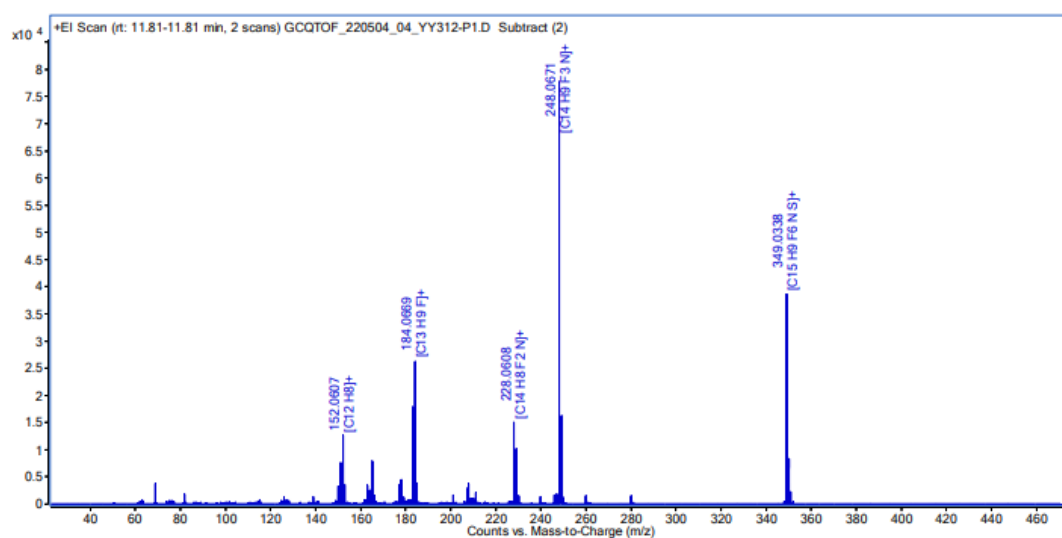

| m/z      | Formula (M) | m/z (Calc) | Diff (ppm) | [M] <sup>+</sup> |
|----------|-------------|------------|------------|------------------|
| 349.0338 | C15H9F6NS   | 349.0354   | -4.6       | [M] <sup>+</sup> |

### N-([1,1'-biphenyl]-4-yl)-N,S-bis(trifluoromethyl)thiohydroxylamine (**3r**)

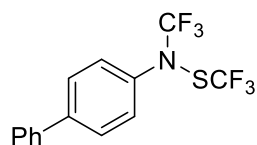

The compound **3r** was obtained as a white solid in 67% yield using 4-isothiocyanato-1,1'-biphenyl following the general procedure E after column chromatography on silica gel with pentane.

<sup>1</sup>H NMR (300 MHz, Chloroform-*d*) δ 7.66 – 7.52 (m, 4H), 7.51 – 7.33 (m, 5H).

<sup>19</sup>F NMR (282 MHz, Chloroform-*d*) δ -51.4 (q, *J* = 3.4 Hz), -56.5 (q, *J* = 3.4 Hz).

<sup>13</sup>C{<sup>1</sup>H} NMR (75 MHz, Chloroform-*d*) δ 141.7, 141.1, 139.7, 128.9, 128.5 (d, *J* = 314.1 Hz), 128.2, 127.9, 127.3, 127.2, 122.1 (q, *J* = 260.9 Hz).

HRMS (EI) calculated for C<sub>14</sub>H<sub>9</sub>F<sub>6</sub>NS: 337.0353 [M]<sup>+</sup>, Found: 337.0359.

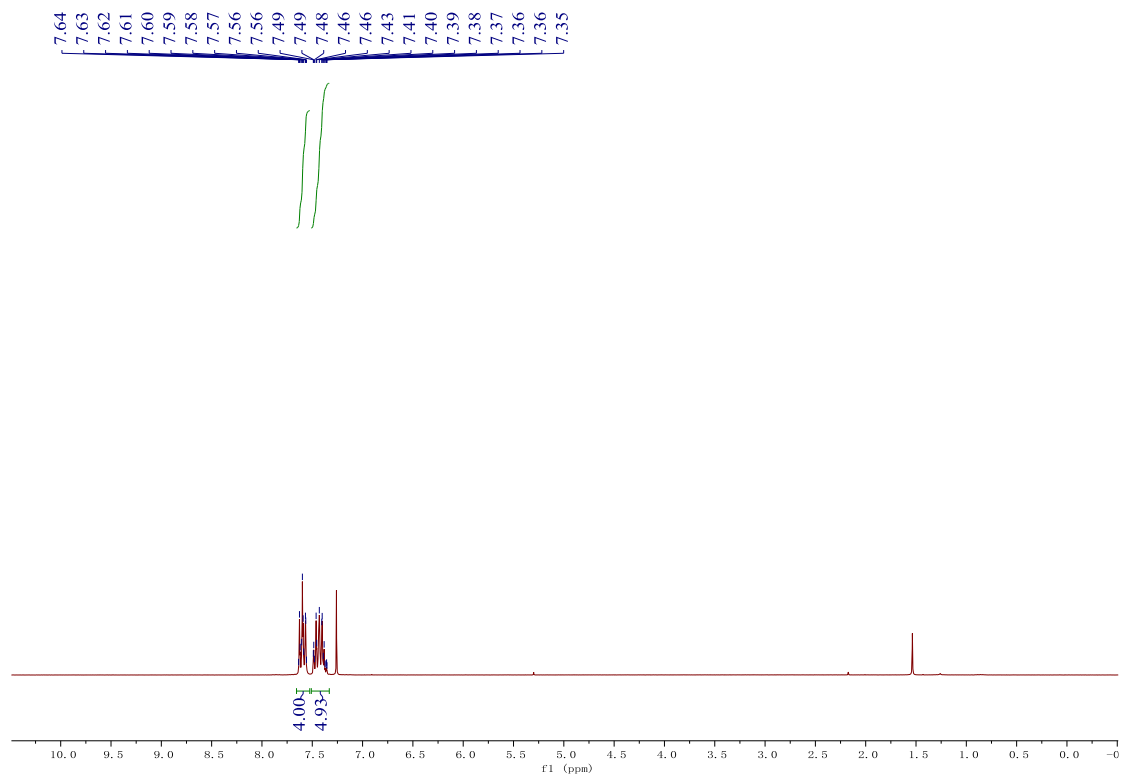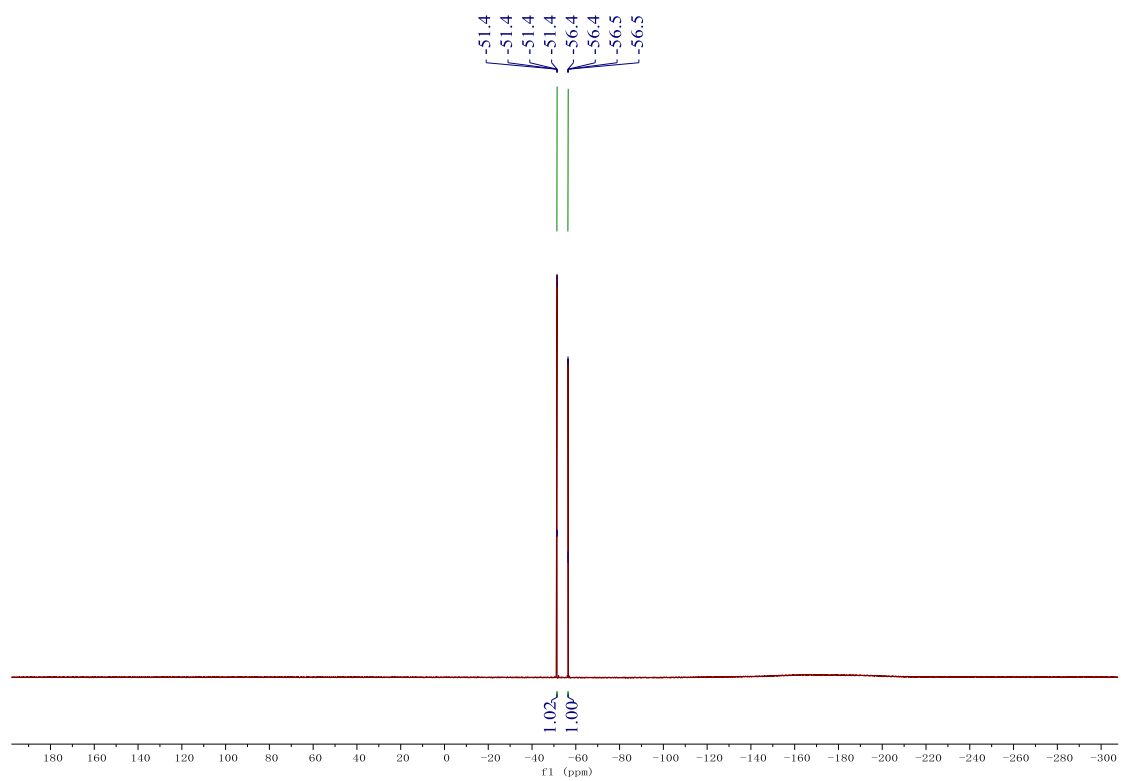

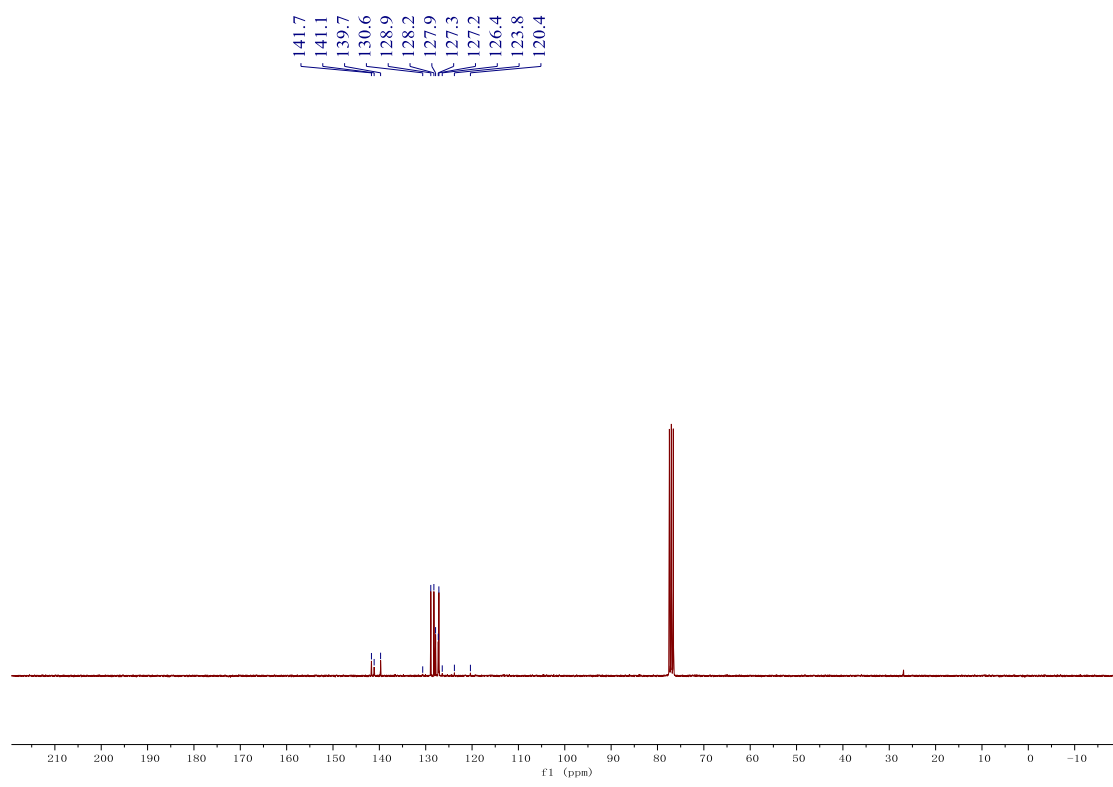

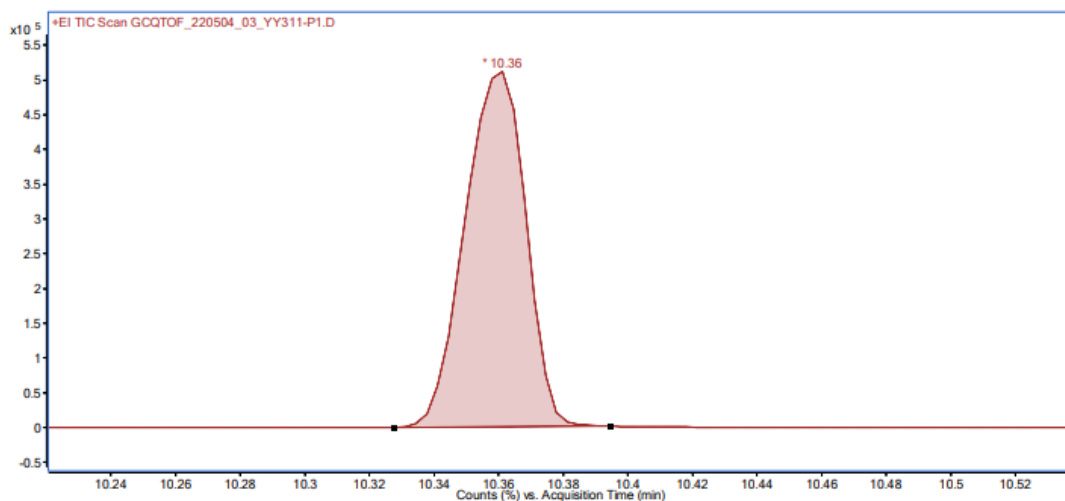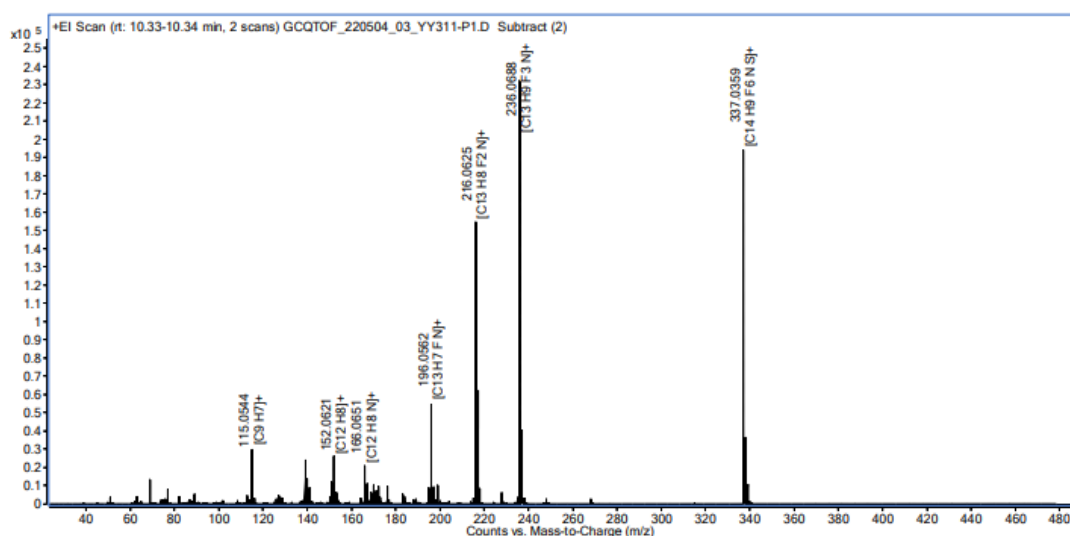

| m/z      | Formula (M) | m/z (Calc) | Diff (ppm) | [M] <sup>+</sup> |
|----------|-------------|------------|------------|------------------|
| 337.0359 | C14H9F6NS   | 337.0353   | 1.8        | [M] <sup>+</sup> |

#### 4-((trifluoromethyl)((trifluoromethyl)thio)amino)benzonitrile (**3t**)

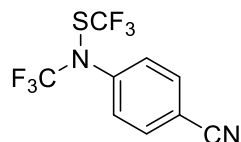

The compound **3t** was obtained as a colorless oil in 40% yield using 4-isothiocyanatobenzonitrile following the general procedure F after column chromatography on silica gel with pentane.

<sup>1</sup>H NMR (300 MHz, Chloroform-*d*) δ 7.75 – 7.69 (m, 2H), 7.49 (d, *J* = 8.4 Hz, 2H).

<sup>19</sup>F NMR (282 MHz, Chloroform-*d*) δ -50.8 (q, *J* = 3.4 Hz), -55.9 (q, *J* = 3.4 Hz).

<sup>13</sup>C{<sup>1</sup>H} NMR (75 MHz, Chloroform-*d*) δ 145.6, 133.6, 128.2 (q, *J* = 316.8 Hz), 126.2, 121.6 (q, *J*

= 262.8 Hz), 117.6, 112.0.

HRMS (EI) calculated for  $C_9H_4F_6N_2S$ : 285.9994  $[M]^+$ , Found: 285.9985.

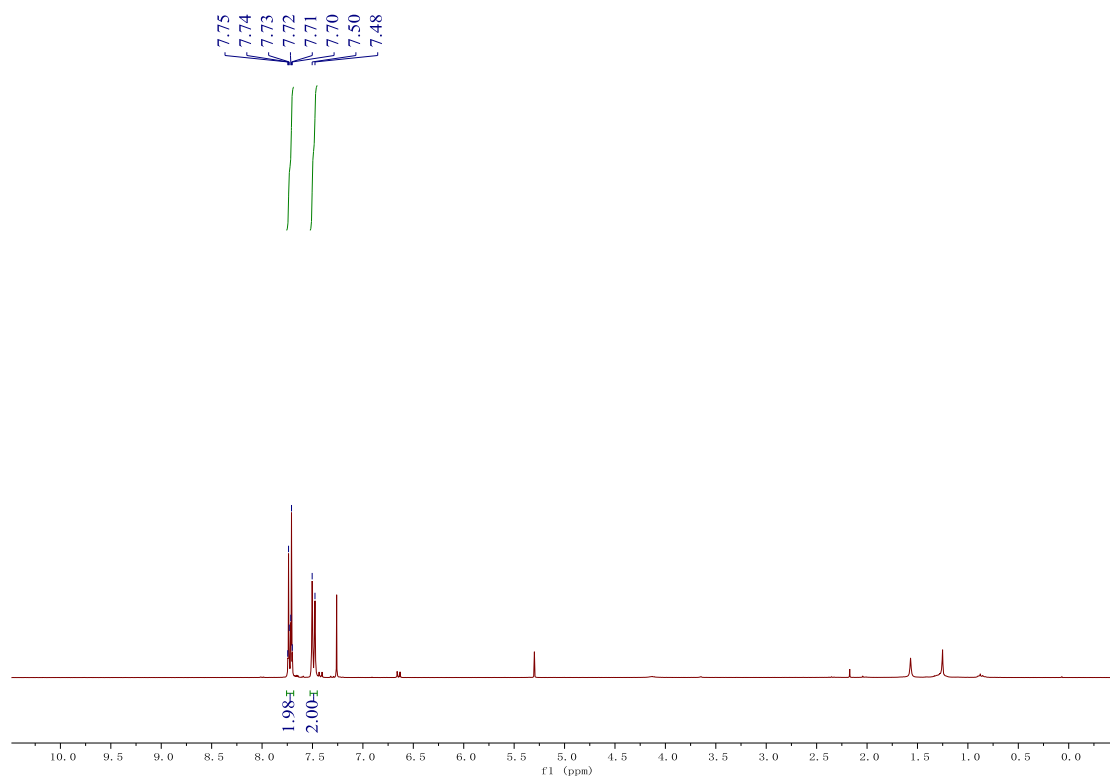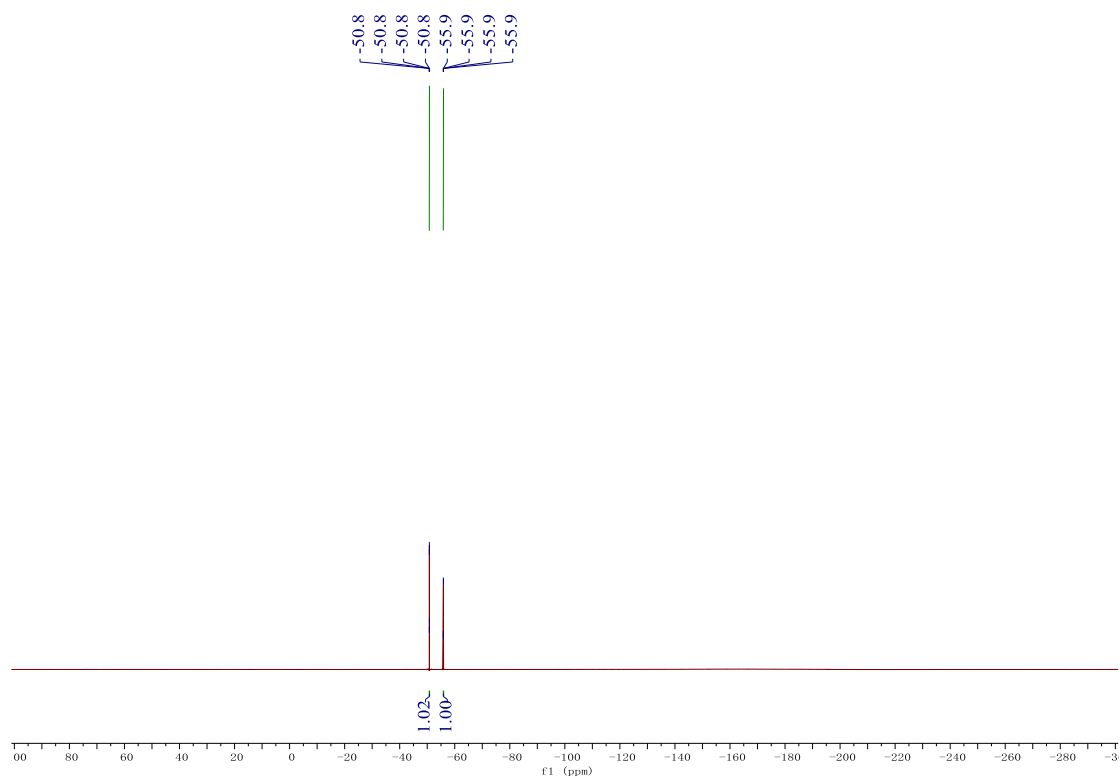



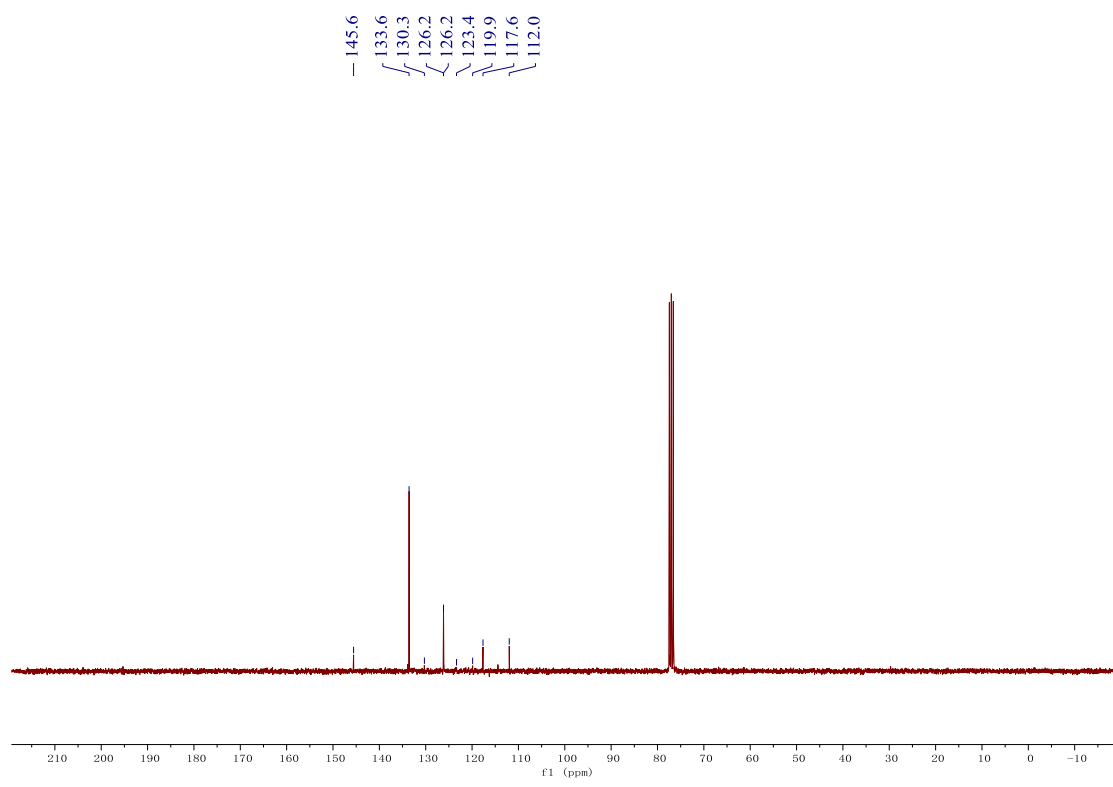

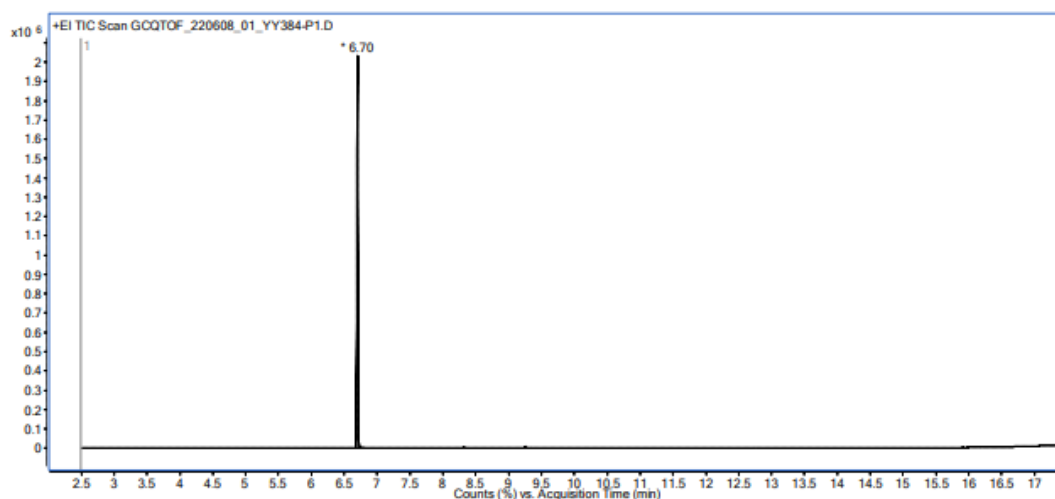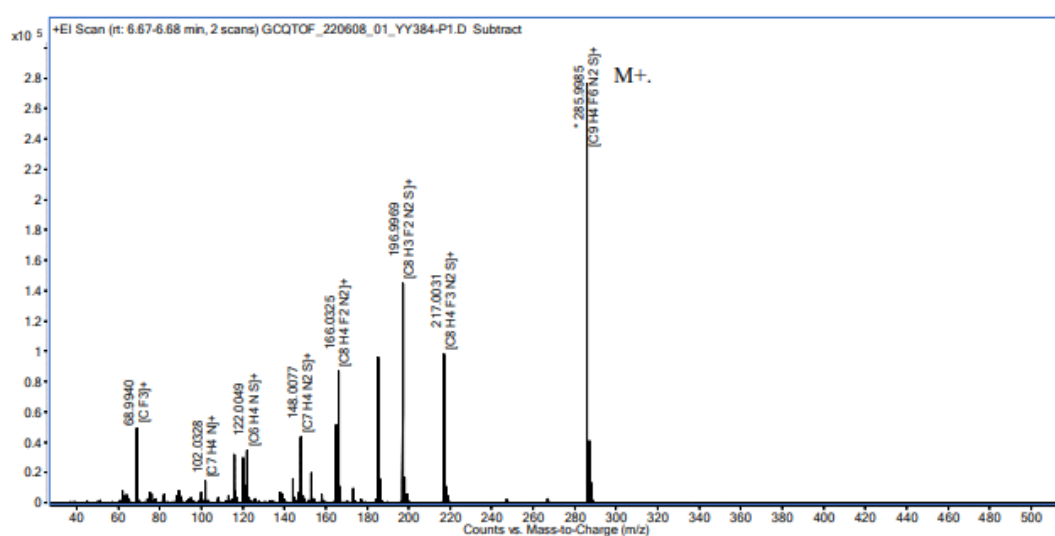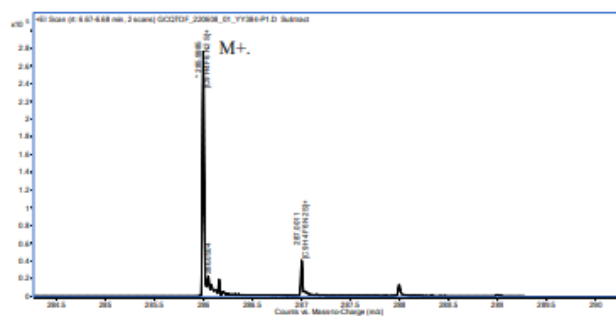

| Meas. m/z | Ion Formula | m/z (Calc) | err (ppm) |                  |
|-----------|-------------|------------|-----------|------------------|
| 285.9985  | C9H4F6N2S   | 285.9994   | -3.1      | [M] <sup>+</sup> |

### 1-(4-(((trifluoromethyl)((trifluoromethyl)thio)amino)phenyl)ethan-1-one (3w)

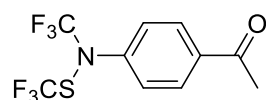

The compound **3w** was obtained as a yellowish oil in 71% yield using 1-(4-isothiocyanatophenyl)ethan-1-one following the general procedure F after column chromatography on silica gel with pentane.

$^1\text{H}$  NMR (300 MHz, Chloroform-*d*)  $\delta$  8.02 – 7.97 (m, 2H), 7.45 (d,  $J = 8.4$  Hz, 2H), 2.61 (s, 3H).

$^{19}\text{F}$  NMR (282 MHz, Chloroform-*d*)  $\delta$  -51.1 (q, q,  $J = 3.4$  Hz), -56.0 (q,  $J = 3.4$  Hz).

$^{13}\text{C}\{^1\text{H}\}$  NMR (75 MHz, Chloroform-*d*)  $\delta$  196.6, 145.2, 136.4, 129.7, 128.3 (q,  $J = 315.3$  Hz), 125.8, 121.8 (q,  $J = 262.0$  Hz), 26.6.

HRMS (EI) calculated for  $\text{C}_{10}\text{H}_7\text{F}_6\text{NOS}$ : 303.0147  $[\text{M}]^+$ , Found: 303.0151.

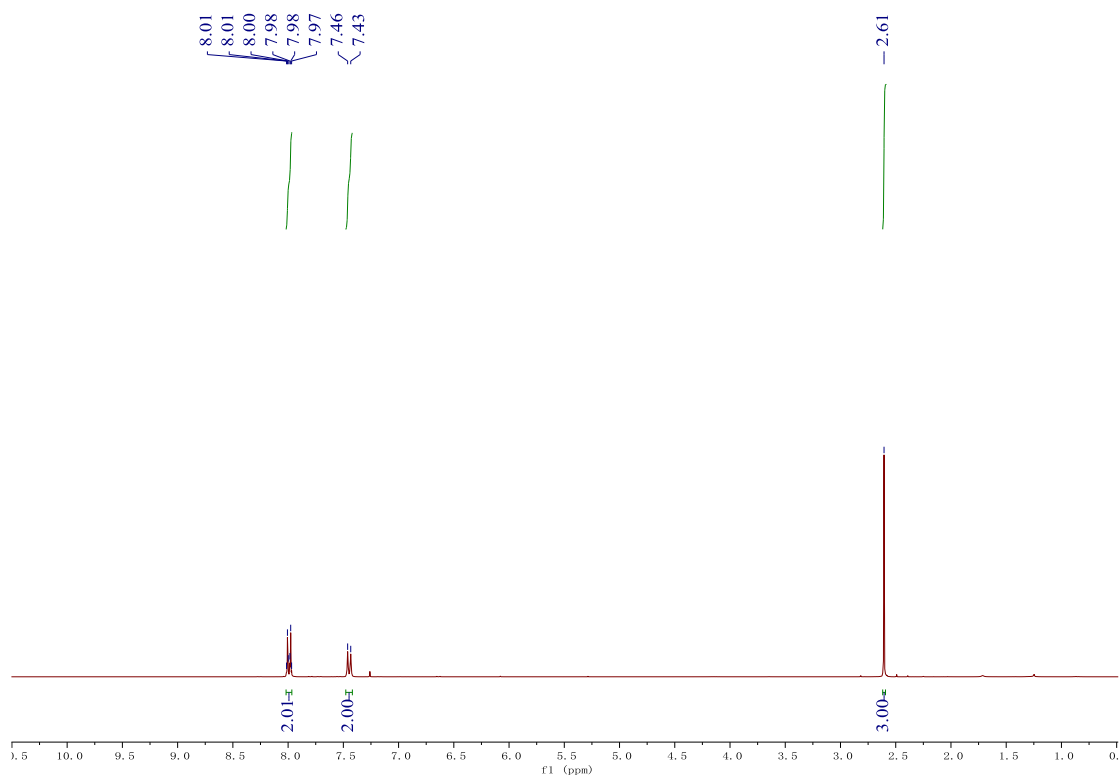

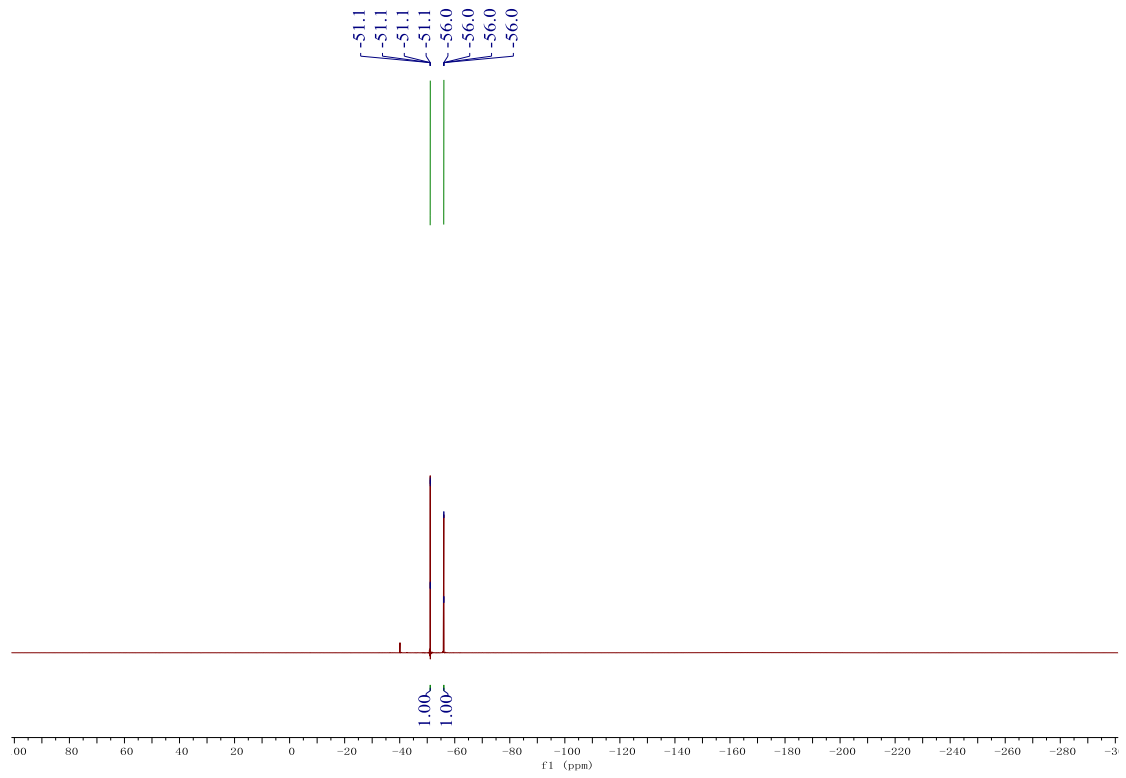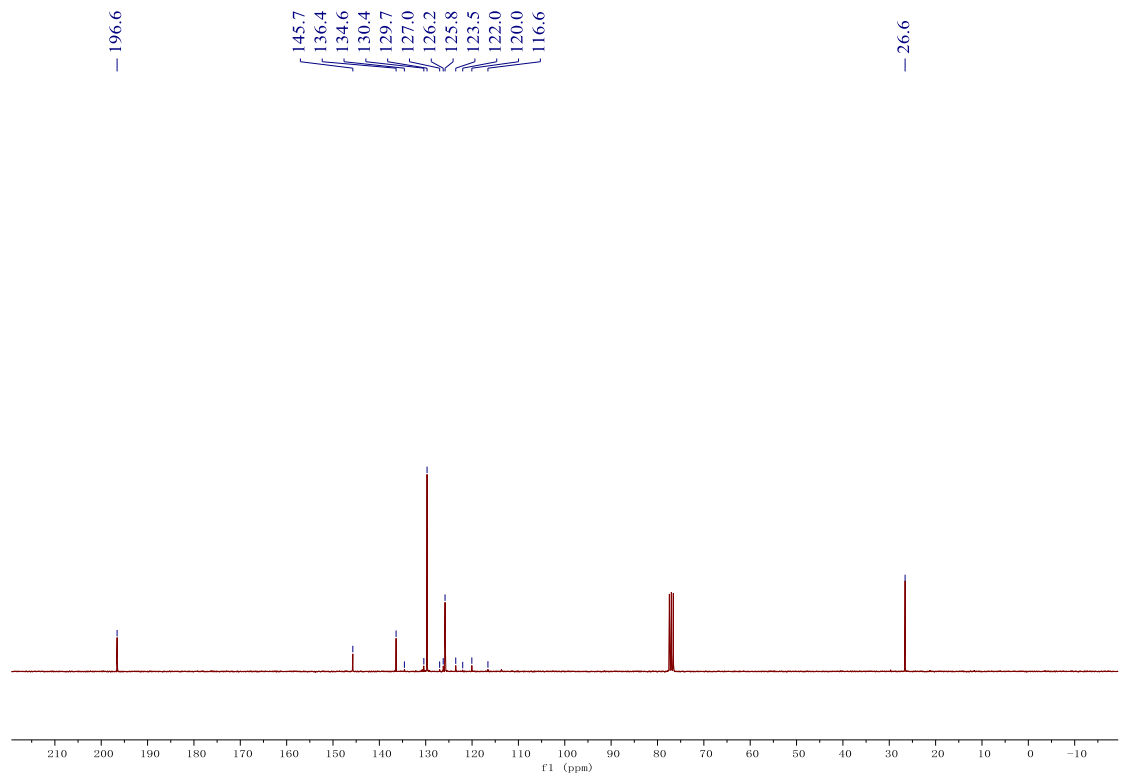

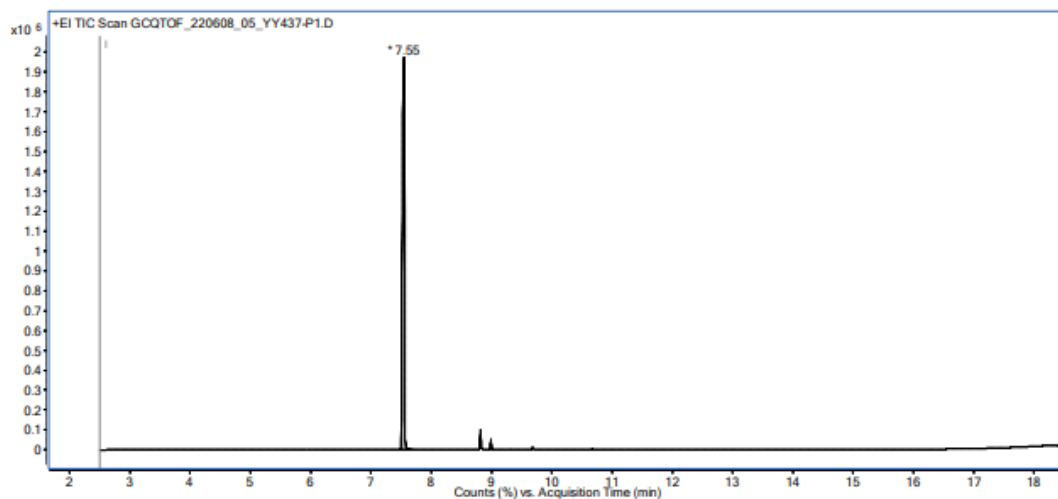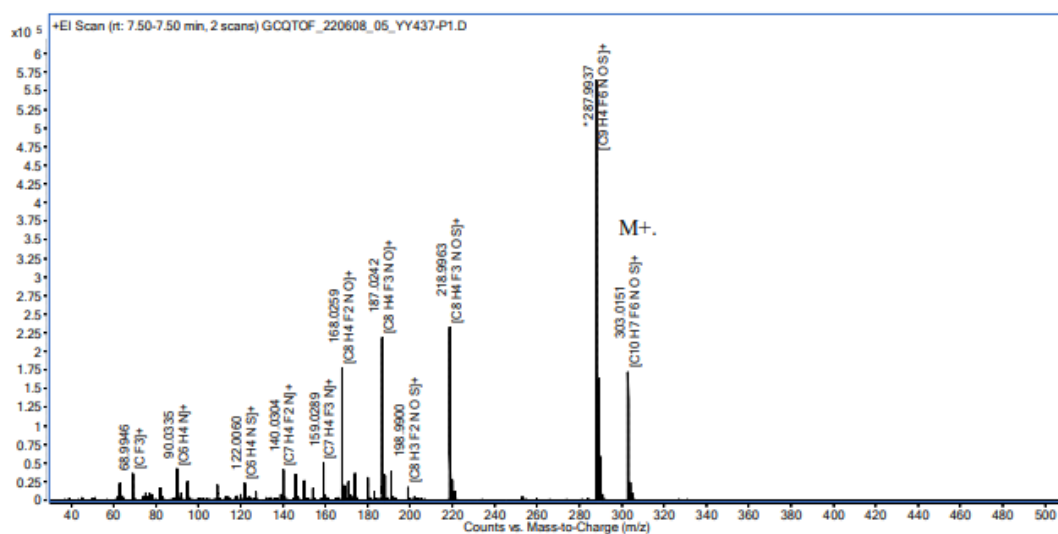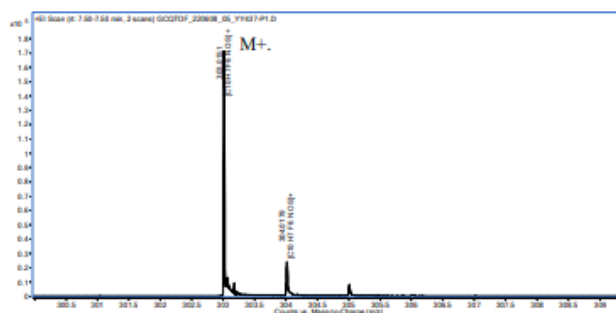

| Meas. m/z | Ion Formula | m/z (Calc) | err (ppm) | [M] <sup>+</sup> |
|-----------|-------------|------------|-----------|------------------|
| 303.0151  | C10H7F6NOS  | 303.0147   | 1.3       | [M] <sup>+</sup> |

#### 4-((trifluoromethyl)((trifluoromethyl)thio)amino)phenyl acetate (3x)

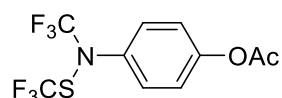

The compound **3x** was obtained as a yellowish oil in 58% yield using 4-isothiocyanatophenyl acetate following the general procedure F after column chromatography on silica gel with pentane.

<sup>1</sup>H NMR (300 MHz, Chloroform-*d*) δ 7.40 – 7.31 (m, 2H), 7.18 – 7.09 (m, 2H), 2.31 (s, 3H).

$^{19}\text{F}$  NMR (282 MHz, Chloroform-*d*)  $\delta$  -51.5 (q,  $J = 3.4$  Hz), -56.7 (q,  $J = 3.4$  Hz).

$^{13}\text{C}\{^1\text{H}\}$  NMR (75 MHz, Chloroform-*d*)  $\delta$  169.0, 150.5, 139.3, 128.5 (q,  $J = 316.5$  Hz), 128.4, 122.7, 122.0 (q,  $J = 261.2$  Hz), 21.1.

HRMS (EI) calculated for  $\text{C}_{10}\text{H}_7\text{F}_6\text{NO}_2\text{S}$ : 319.0096  $[\text{M}]^+$ , Found: 319.0101.

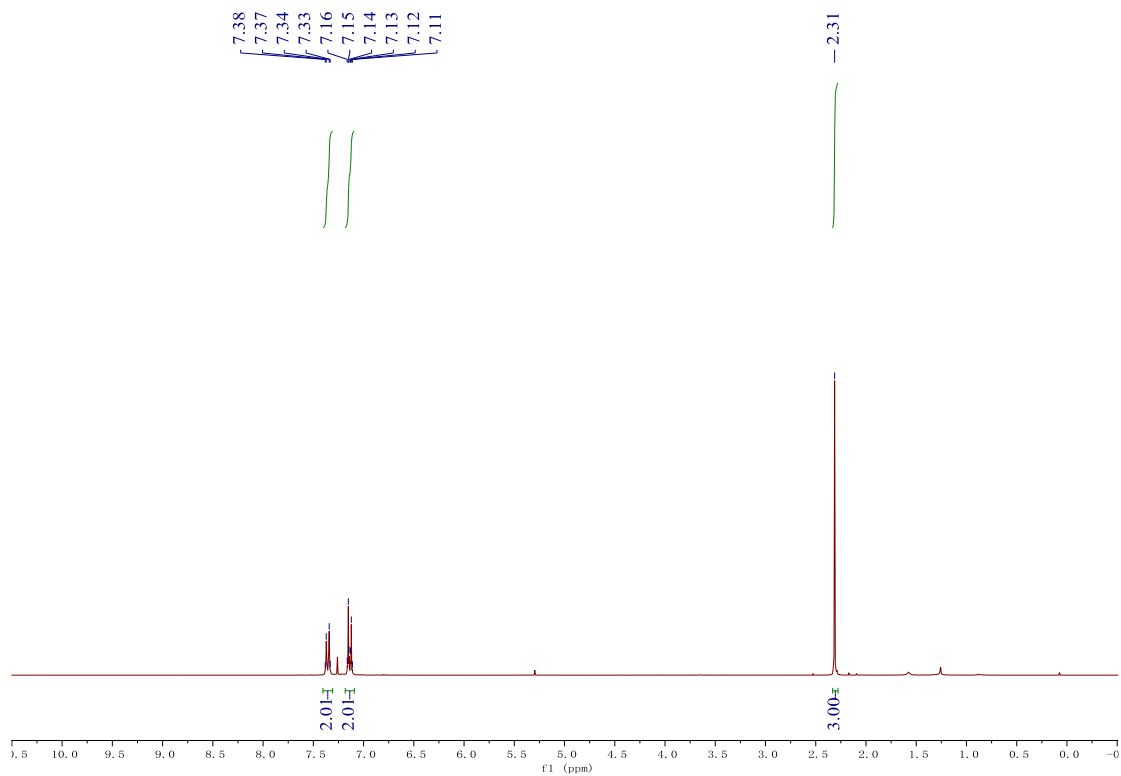

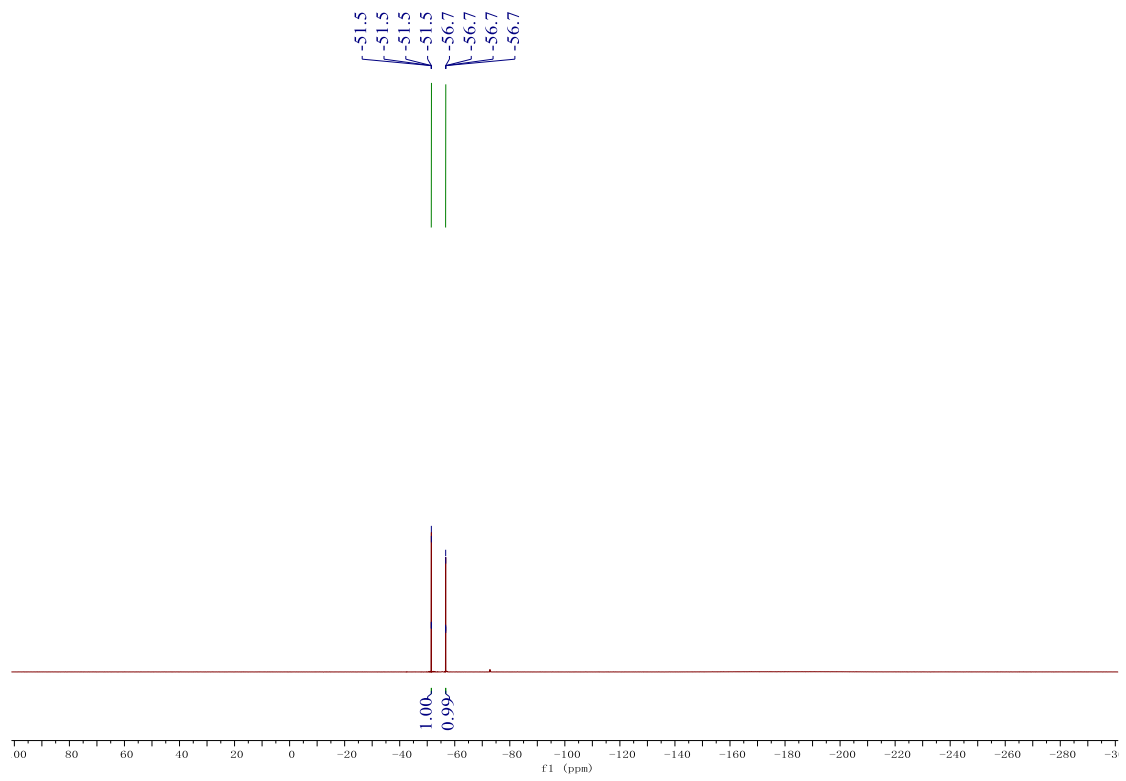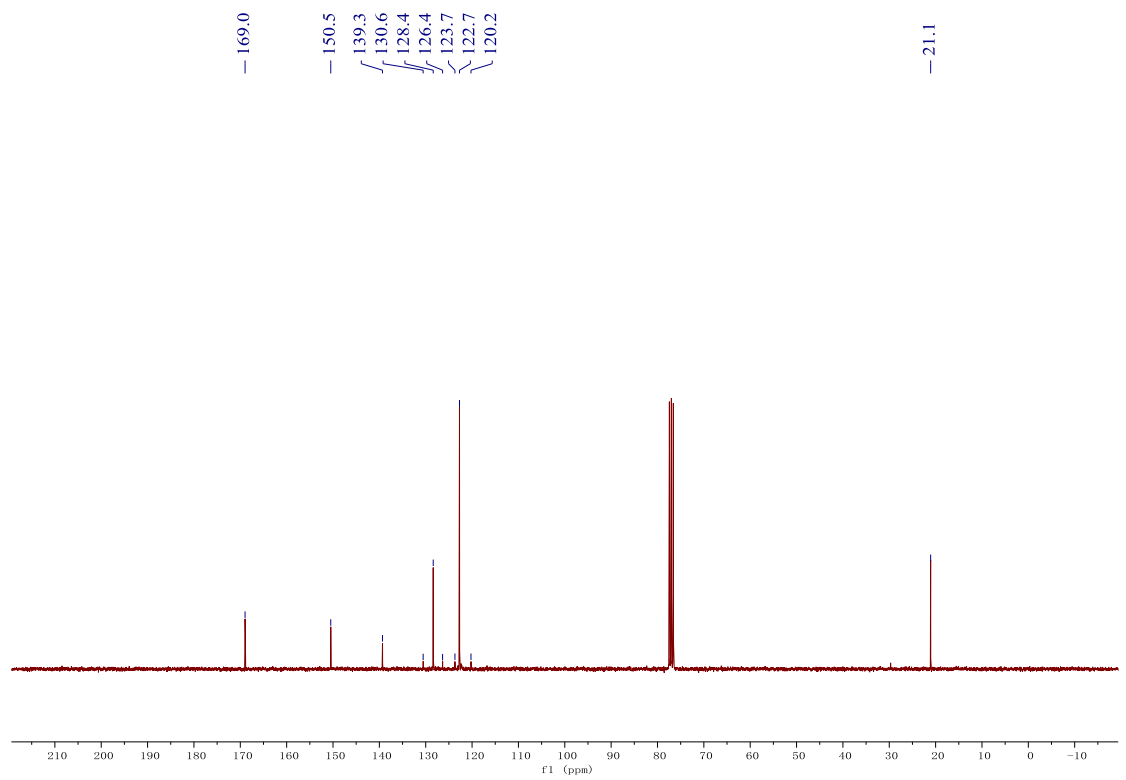

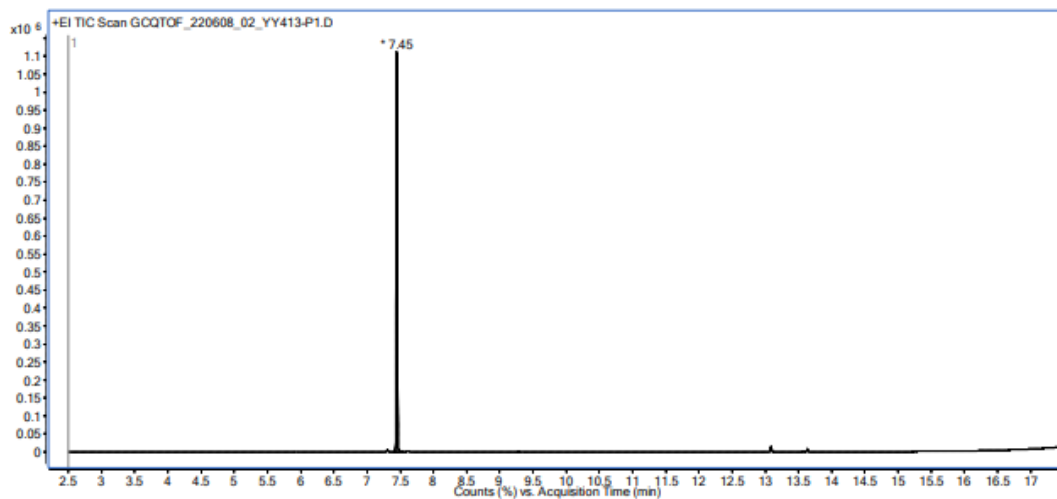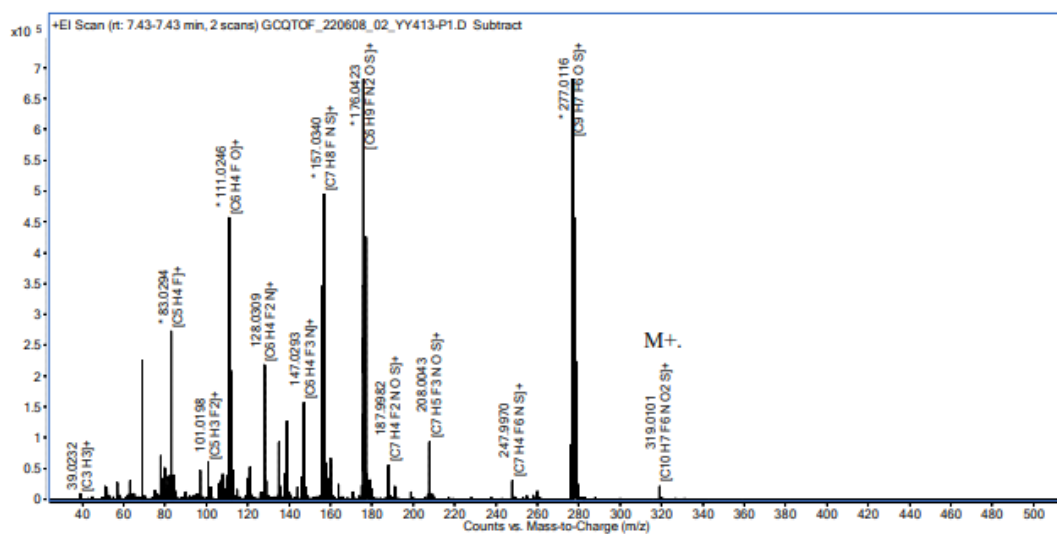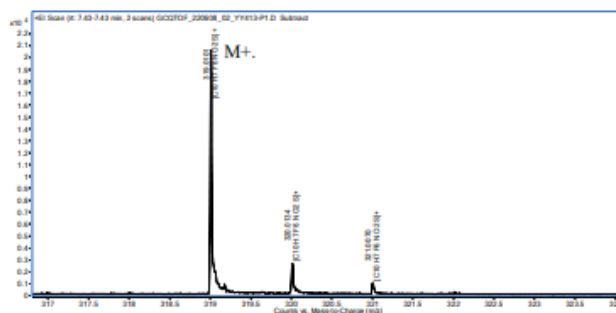

| Meas. m/z | Ion Formula | m/z (Calc) | err (ppm) |                  |
|-----------|-------------|------------|-----------|------------------|
| 319.0101  | C10H7F6NO2S | 319.0096   | 1.6       | [M] <sup>+</sup> |

**4-((trifluoromethyl)((trifluoromethyl)thio)amino)phenyl 4-pentylbicyclo[2.2.2]octane-1-carboxylate (3y)**

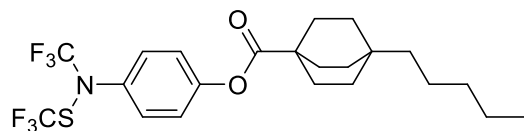

The compound **3y** was obtained as a colorless oil in 65% yield using 4-isothiocyanatophenyl 4-pentylbicyclo[2.2.2]octane-1-carboxylate following the general procedure F after column



chromatography on silica gel with pentane.

$^1\text{H}$  NMR (300 MHz, Chloroform-*d*)  $\delta$  7.34 (d,  $J = 8.4$  Hz, 2H), 7.08 (d,  $J = 8.5$  Hz, 2H), 2.00 – 1.81 (m, 6H), 1.53 – 1.38 (m, 6H), 1.34 – 1.08 (m, 8H), 0.89 (t,  $J = 6.9$  Hz, 3H).

$^{19}\text{F}$  NMR (282 MHz, Chloroform-*d*)  $\delta$  -51.5 (q,  $J = 3.4$  Hz), -56.7 (q,  $J = 3.4$  Hz).

$^{13}\text{C}\{^1\text{H}\}$  NMR (75 MHz, Chloroform-*d*)  $\delta$  176.3, 151.0, 139.1, 128.5 (q,  $J = 316.8$  Hz), 128.3, 122.7, 122.0 (q,  $J = 260.9$  Hz), 41.3, 39.5, 32.8, 30.5, 30.3, 28.6, 23.3, 22.7, 14.0.

HRMS (ESI) calculated for  $\text{C}_{22}\text{H}_{28}\text{F}_6\text{NO}_2\text{S}$ : 484.1739  $[\text{M}+\text{H}]^+$ , Found: 484.1739.

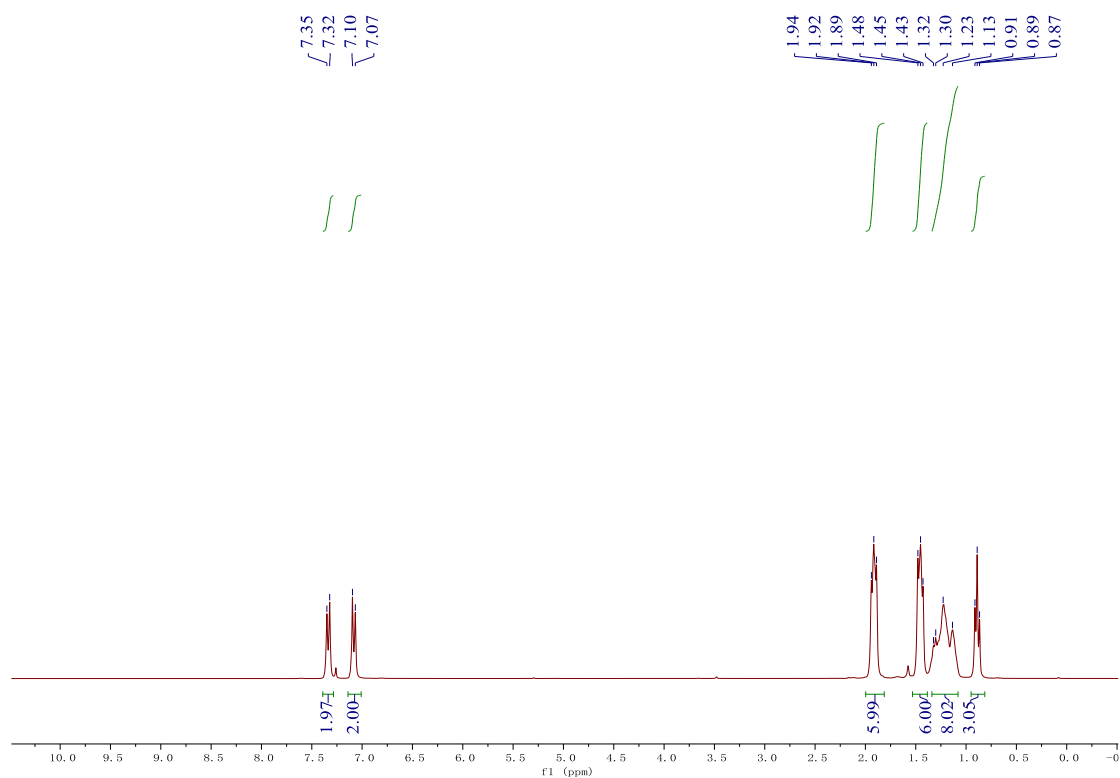

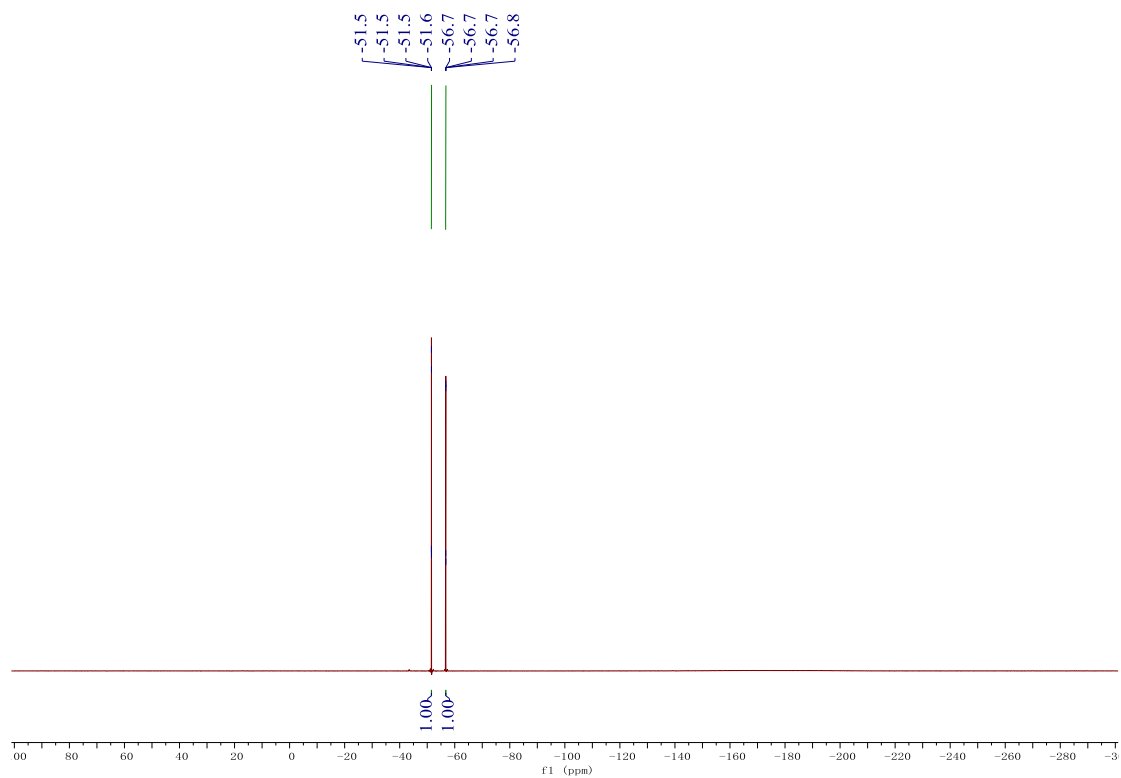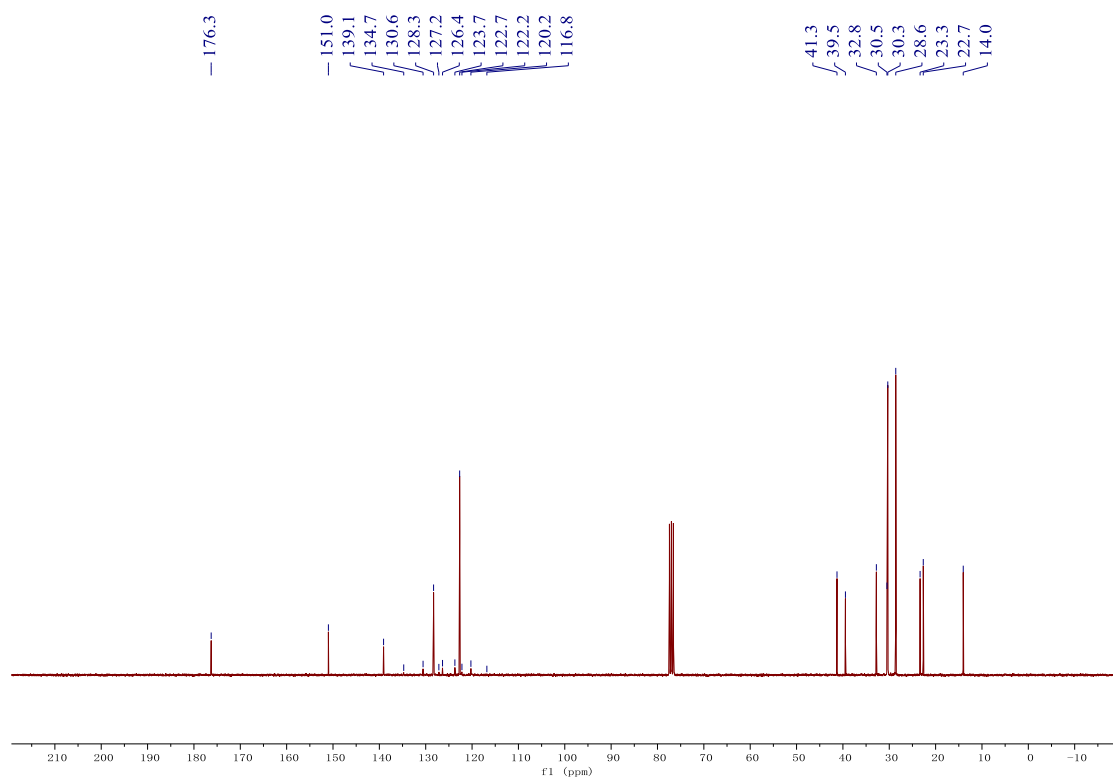

CENTRE COMMUN DE SPECTROMETRIE DE MASSE

**Analysis Info**

Analysis Name Impact2\_220718\_01\_YY540-P1.d  
 Method Tune\_pos\_Standard.m  
 Comment  
 Acquisition Date 7/18/2022 11:10:08 AM  
 Instrument / Ser# impact II 1825265.1  
 0081

**Acquisition Parameter**

|             |          |                       |           |                  |           |
|-------------|----------|-----------------------|-----------|------------------|-----------|
| Source Type | ESI      | Ion Polarity          | Positive  | Set Nebulizer    | 0.3 Bar   |
| Focus       | Active   | Set Capillary         | 1200 V    | Set Dry Heater   | 200 °C    |
| Scan Begin  | 50 m/z   | Set End Plate Offset  | -500 V    | Set Dry Gas      | 4.0 l/min |
| Scan End    | 1000 m/z | Set Collision Cell RF | 750.0 Vpp | Set Divert Valve | Source    |

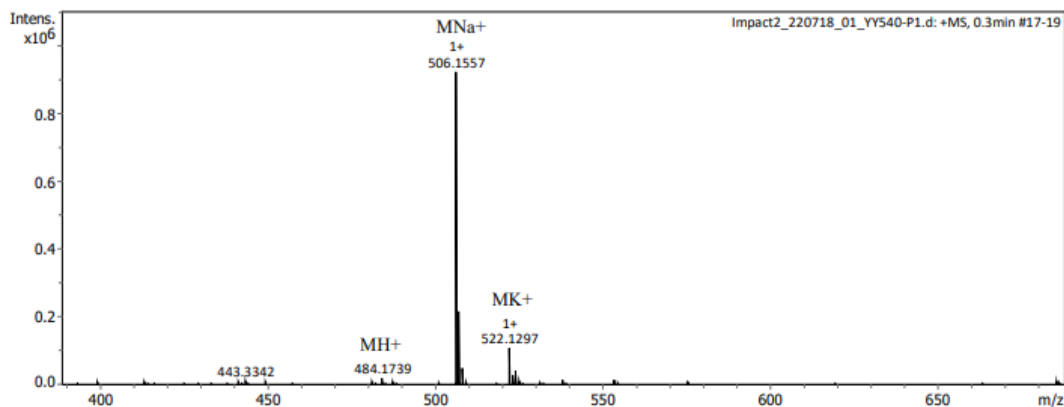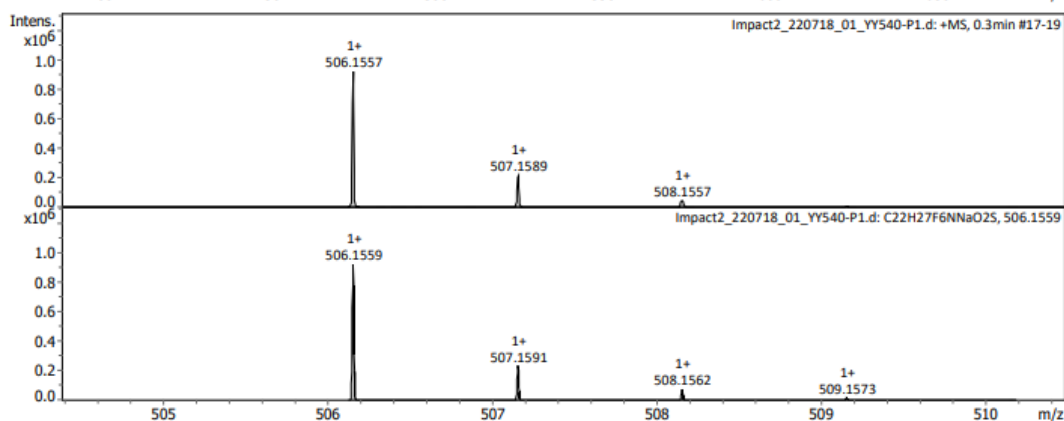

| Meas. m/z | Ion Formula    | m/z      | Sum Formula  | err [ppm] | mSigma | Adduct | z  |
|-----------|----------------|----------|--------------|-----------|--------|--------|----|
| 484.1739  | C22H28F6NO2S   | 484.1739 | C22H27F6NO2S | -0.0      | 11.5   | M+H    | 1+ |
| 506.1557  | C22H27F6NNaO2S | 506.1559 |              | 0.3       | 16.9   | M+Na   | 1+ |
| 522.1297  | C22H27F6KNO2S  | 522.1298 |              | 0.2       | 6.5    | M+K    | 1+ |

**N-(4-bromophenyl)-N,S-bis(trifluoromethyl)thiohydroxylamine (3z)**

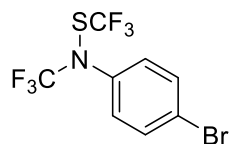

The compound **3z** was obtained as a colorless oil in 70% yield using 1-bromo-4-isothiocyanatobenzene following the general procedure F after column chromatography on silica gel with pentane.

<sup>1</sup>H NMR (300 MHz, Chloroform-*d*) δ 7.57 – 7.50 (m, 2H), 7.23 (d, *J* = 8.7 Hz, 2H).

<sup>19</sup>F NMR (282 MHz, Chloroform-*d*) δ -51.4 (q, *J* = 3.4 Hz), -56.6 (q, *J* = 3.4 Hz).

$^{13}\text{C}\{^1\text{H}\}$  NMR (75 MHz, Chloroform-*d*)  $\delta$  141.0, 132.8, 128.6, 128.4 (q,  $J = 316.0$  Hz), 122.6, 121.8 (q,  $J = 261.5$  Hz).

HRMS (EI) calculated for  $\text{C}_8\text{H}_4\text{BrF}_6\text{NS}$ : 338.9147  $[\text{M}]^+$ , Found: 338.9155.

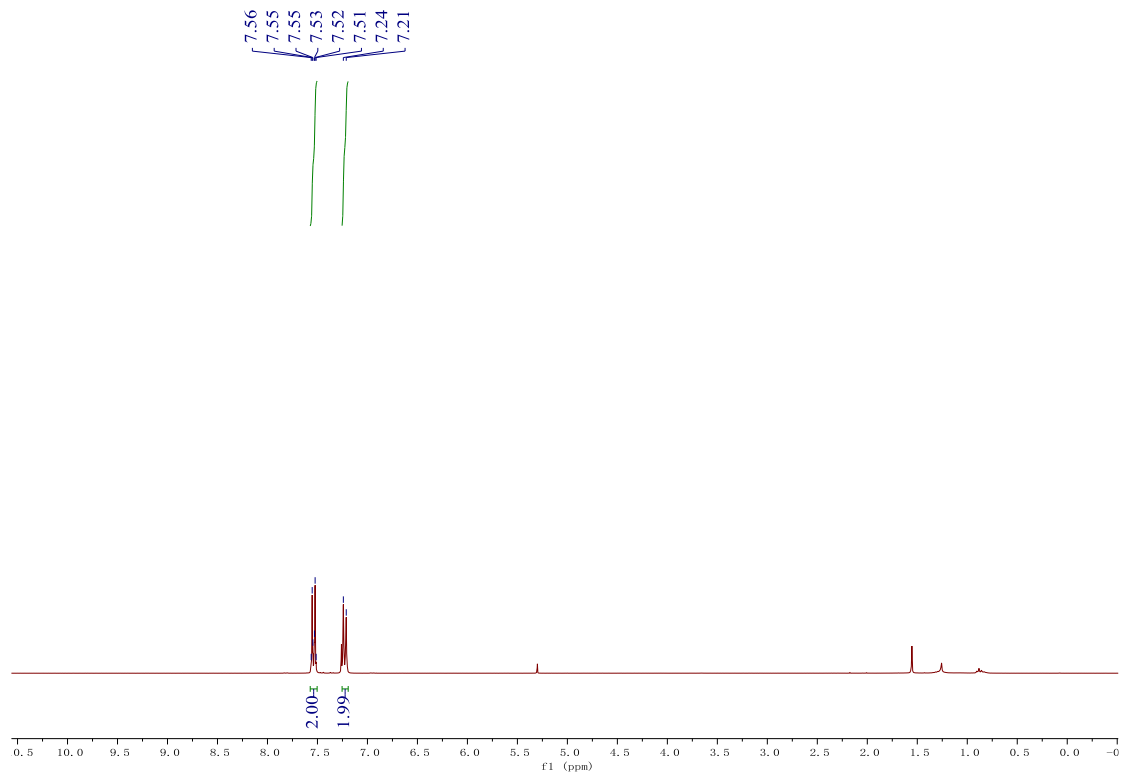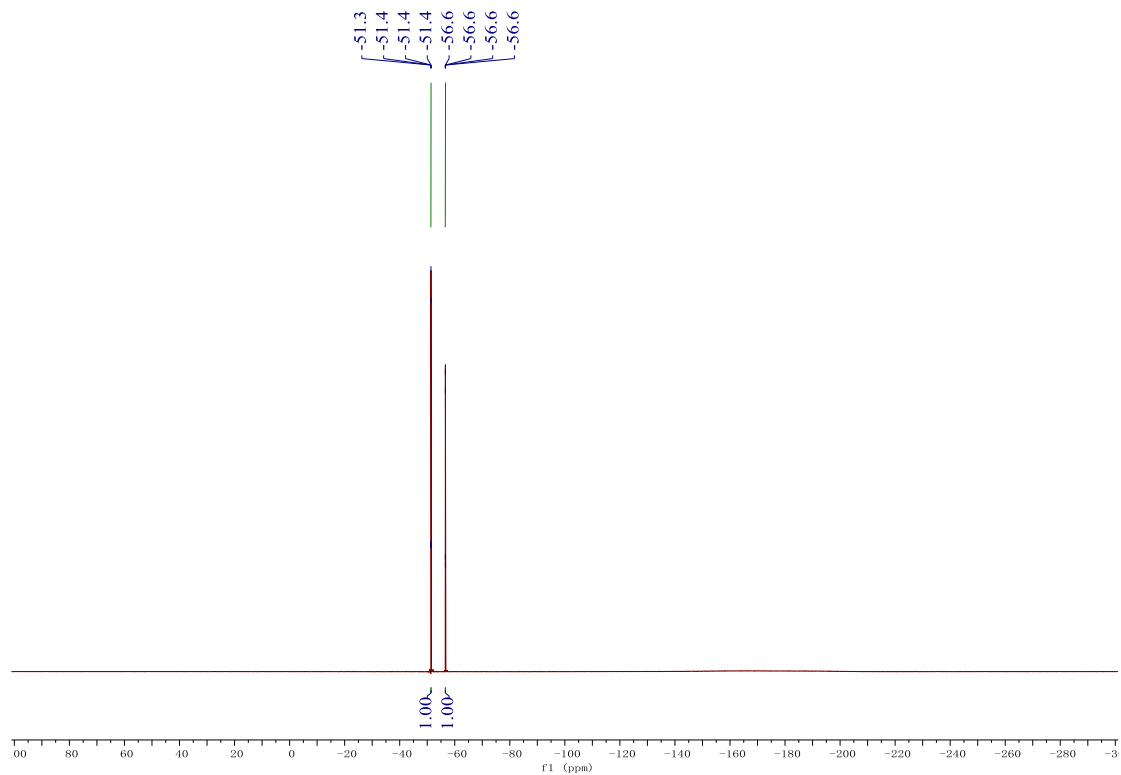

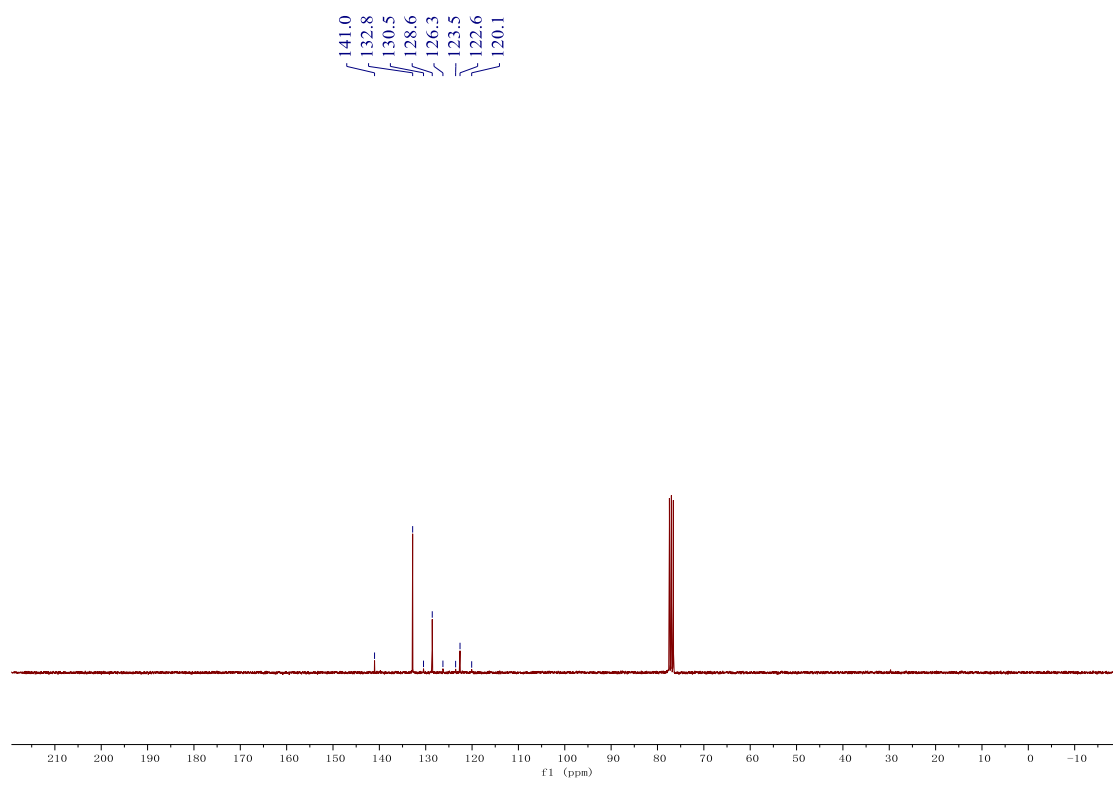

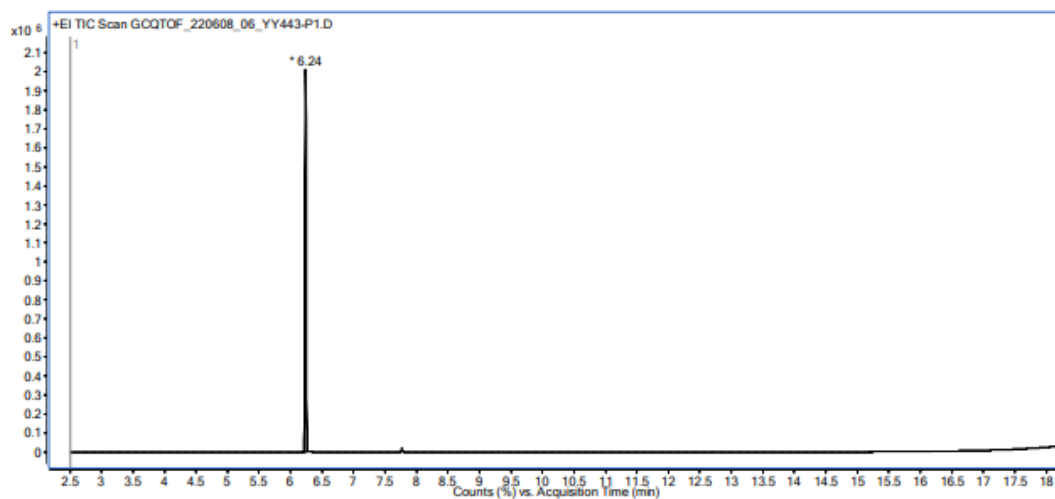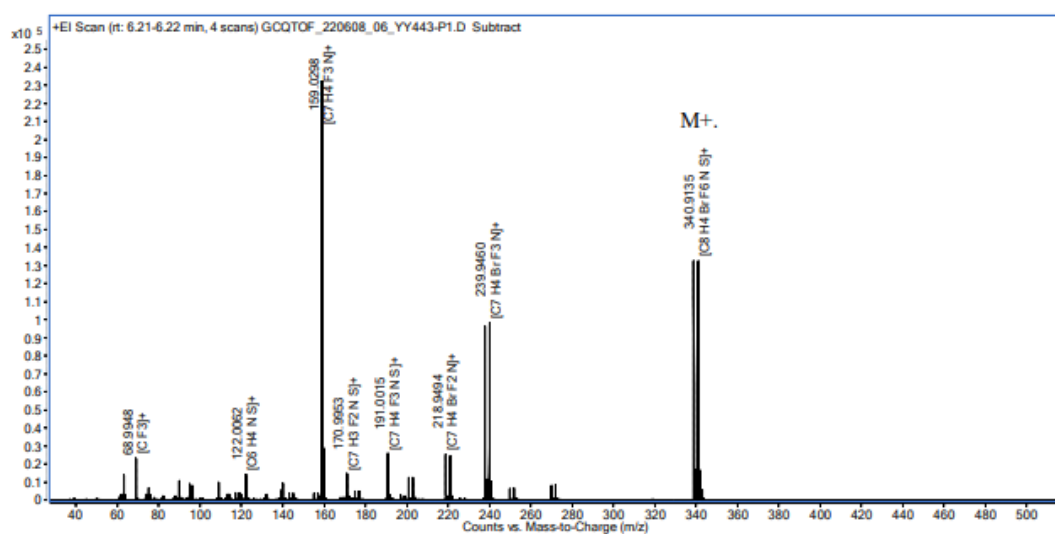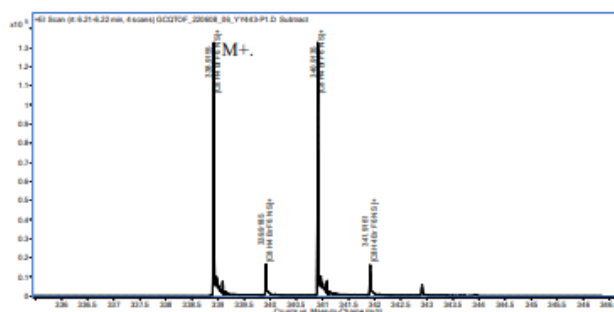

| Meas. m/z | Ion Formula | m/z (Calc) | err (ppm) |                  |
|-----------|-------------|------------|-----------|------------------|
| 338.9155  | C8H4BrF6NS  | 338.9147   | 2.4       | [M] <sup>+</sup> |

### N-(naphthalen-1-yl)-N,S-bis(trifluoromethyl)thiohydroxylamine (3aa)

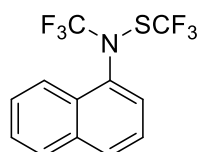

The compound **3aa** was obtained as a colorless oil in 72% yield using 1-isothiocyanatonaphthalene following the general procedure F after column chromatography on silica gel with pentane.

$^1\text{H}$  NMR (300 MHz, Chloroform-*d*)  $\delta$  7.94 (d,  $J = 8.3$  Hz, 2H), 7.88 – 7.54 (m, 4H), 7.53 – 7.47 (m, 1H).

$^{19}\text{F}$  NMR (282 MHz, Chloroform-*d*)  $\delta$  -50.9 (q,  $J = 3.4$  Hz), -56.1, -59.1.

$^{13}\text{C}\{^1\text{H}\}$  NMR (75 MHz, Chloroform-*d*)  $\delta$  134.7, 130.2, 128.6, 128.6 (q,  $J = 315.7$  Hz), 127.6, 127.1, 126.8, 125.3, 122.3 (q,  $J = 259.0$  Hz), 122.3, 122.1.

HRMS (EI) calculated for  $\text{C}_{12}\text{H}_7\text{F}_6\text{NS}$ : 311.0198  $[\text{M}]^+$ , Found: 311.0190.

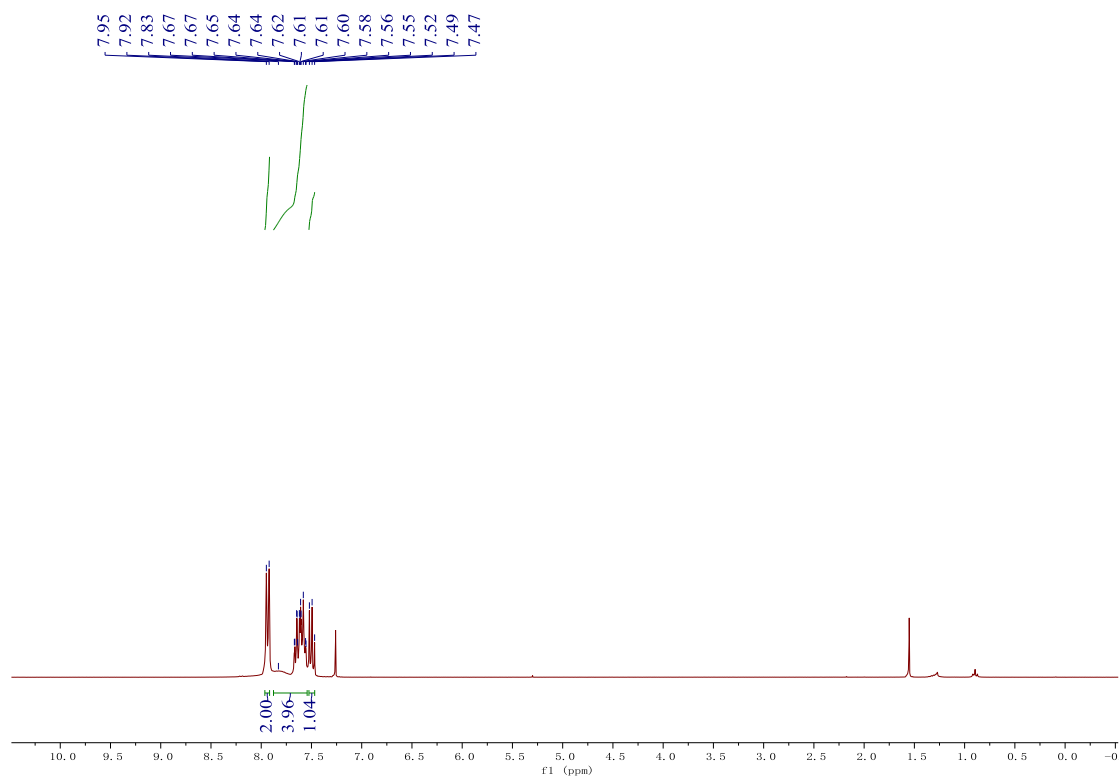

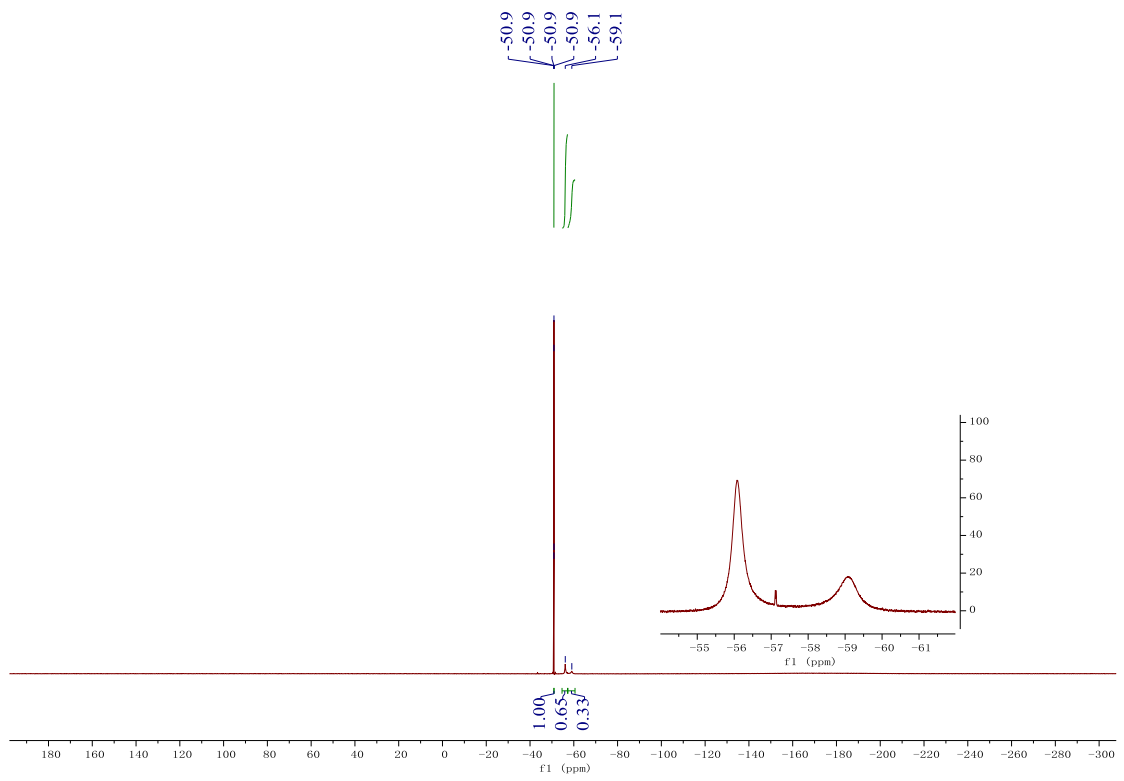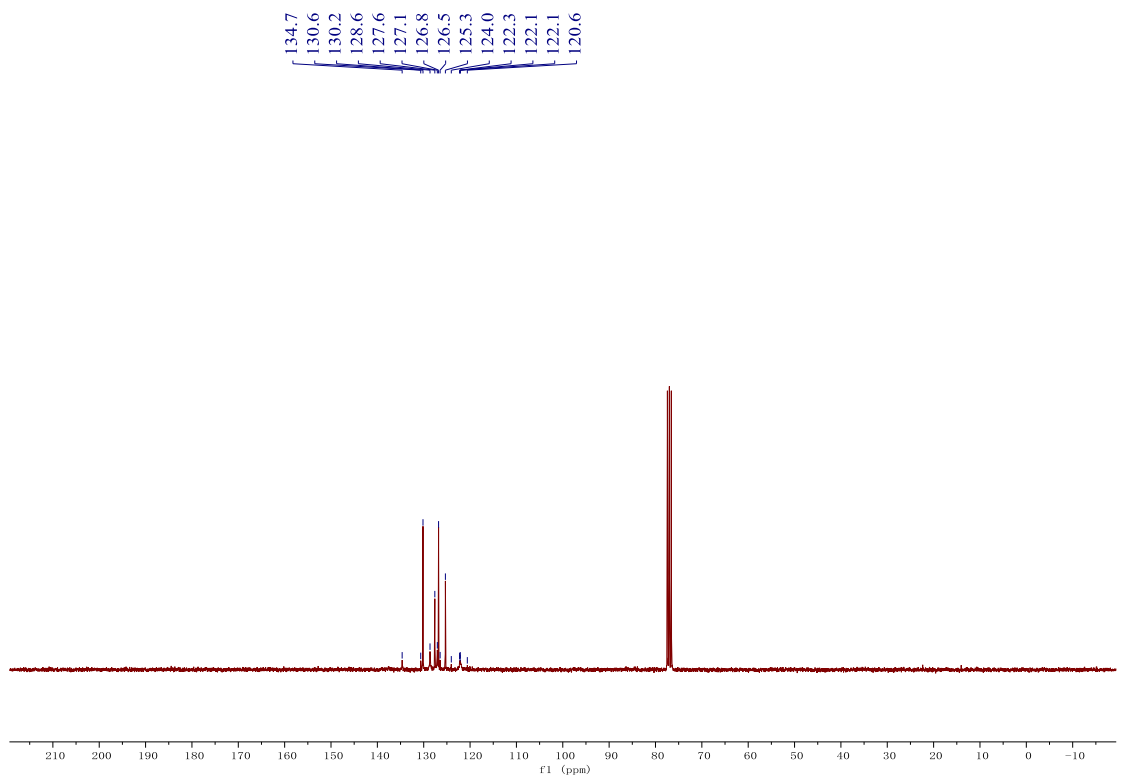



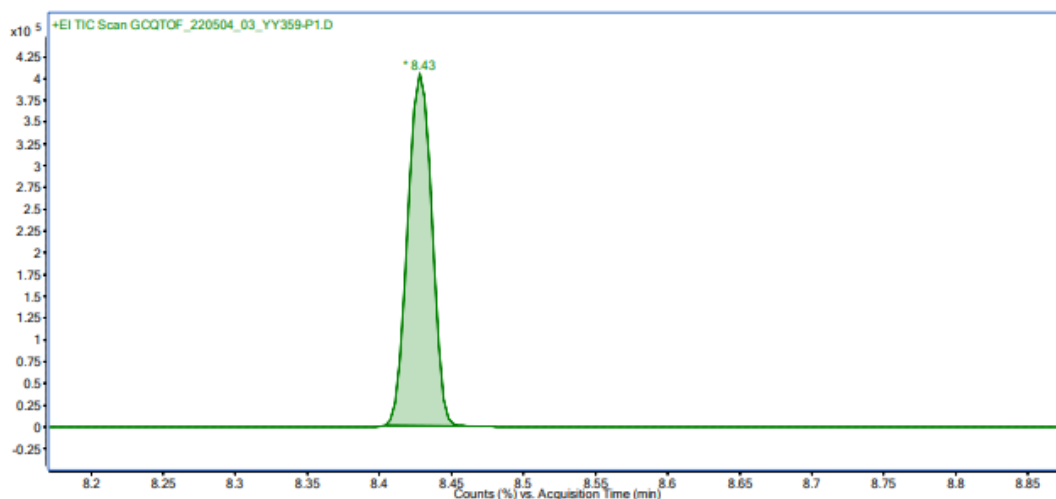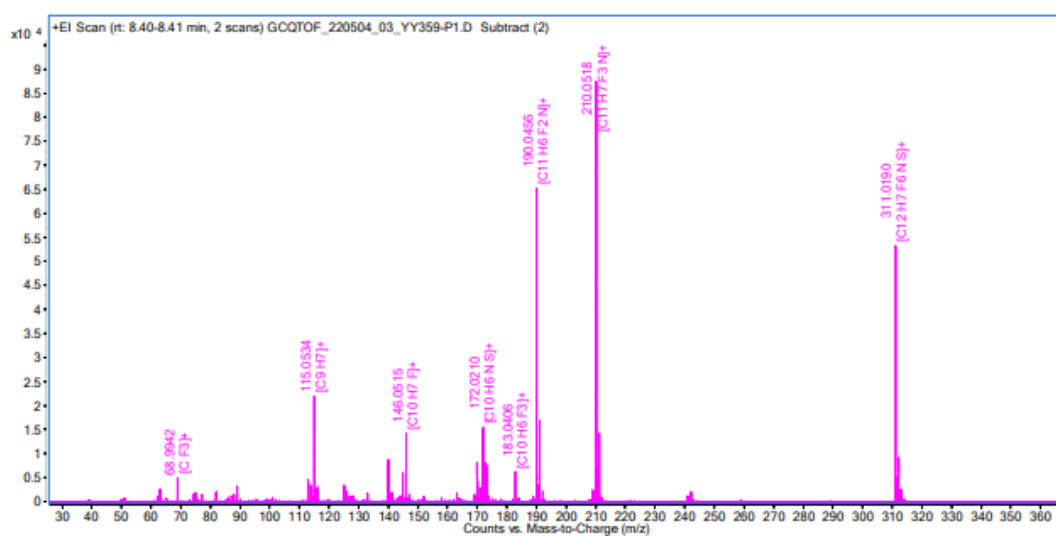

| m/z      | Formula (M)                                      | m/z (Calc) | Diff (ppm) | [M] <sup>+</sup> |
|----------|--------------------------------------------------|------------|------------|------------------|
| 311.0190 | C <sub>12</sub> H <sub>7</sub> F <sub>6</sub> NS | 311.0198   | -2.6       | [M] <sup>+</sup> |

### N-(4-(4-fluorophenoxy)phenyl)-N,S-bis(trifluoromethyl)thiohydroxylamine (3ab)

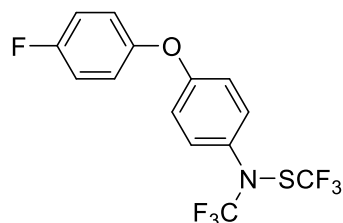

The compound **3ab** was obtained as a colorless oil in 67% yield using 1-fluoro-4-(4-isothiocyanatophenoxy)benzene following the general procedure F after column chromatography on silica gel with pentane.

<sup>1</sup>H NMR (300 MHz, Chloroform-*d*) δ 7.31 – 7.25 (m, 2H), 7.11 – 6.97 (m, 4H), 6.96 – 6.89 (m, 2H).

$^{19}\text{F}$  NMR (282 MHz, Chloroform-*d*)  $\delta$  -51.6 (q,  $J = 3.4$  Hz), -56.9 (q,  $J = 3.4$  Hz), -118.5 – -118.7 (m).

$^{13}\text{C}\{^1\text{H}\}$  NMR (75 MHz, Chloroform-*d*)  $\delta$  159.4 (d,  $J = 243.0$  Hz), 158.2, 151.7 (d,  $J = 2.6$  Hz), 136.6, 1291, 128.5 (q,  $J = 315.7$  Hz), 122.0 (q,  $J = 260.6$  Hz), 121.4 (d,  $J = 8.4$  Hz), 118.2, 116.6 (d,  $J = 23.4$  Hz).

HRMS (EI) calculated for  $\text{C}_{14}\text{H}_8\text{F}_7\text{NOS}$ : 371.0209  $[\text{M}]^+$ , Found: 371.0205.

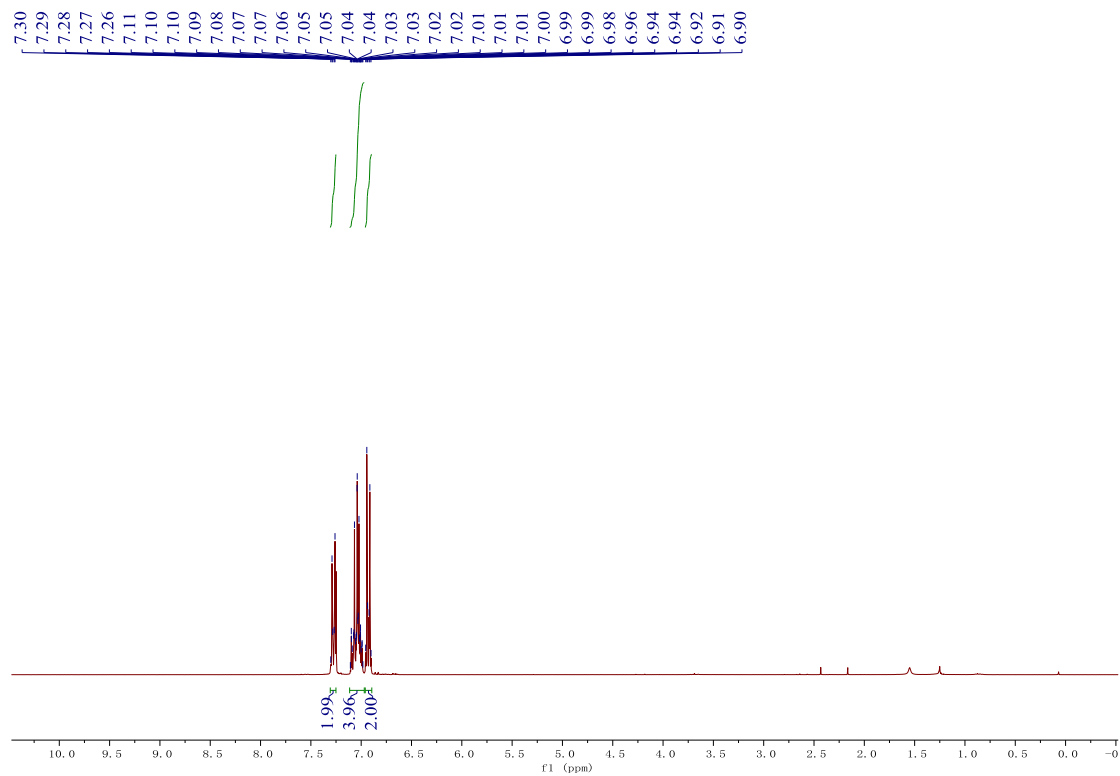

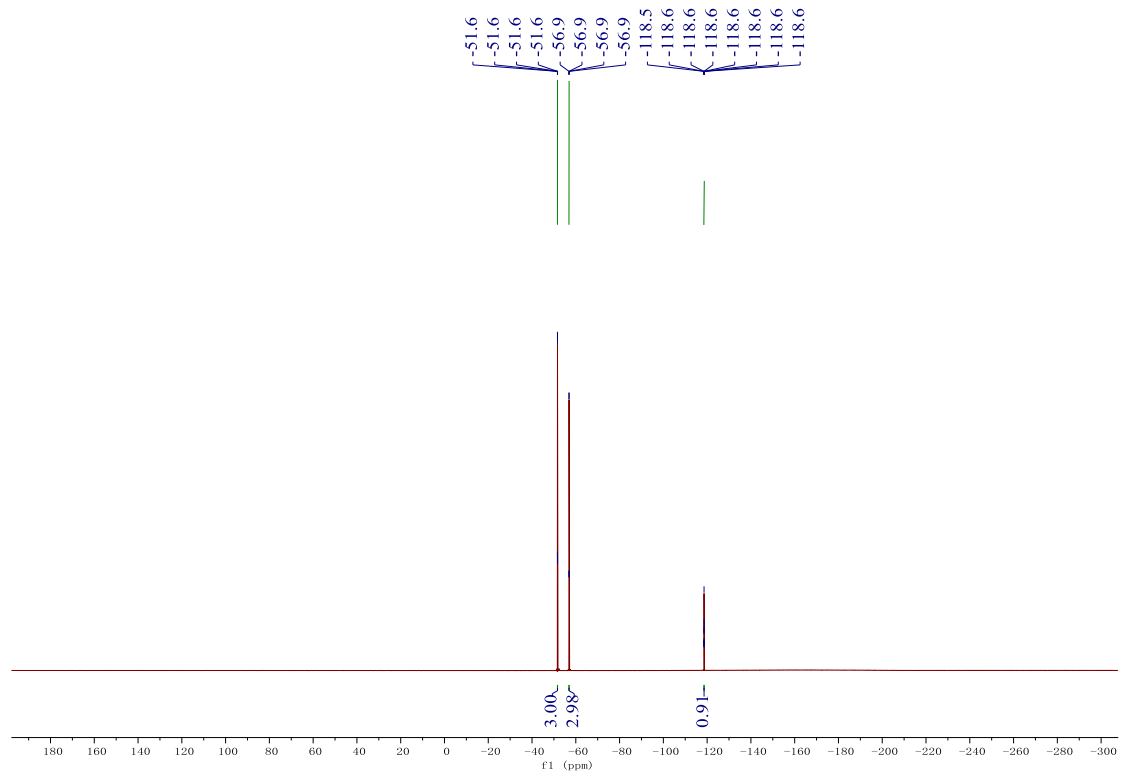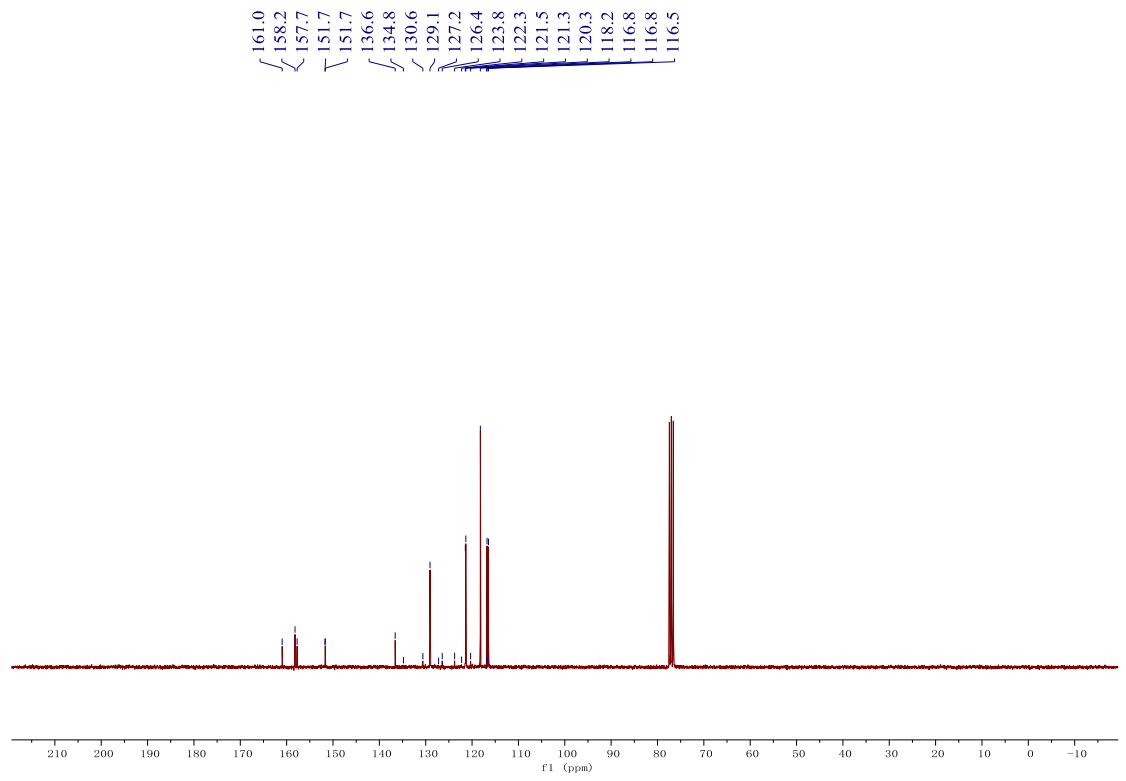

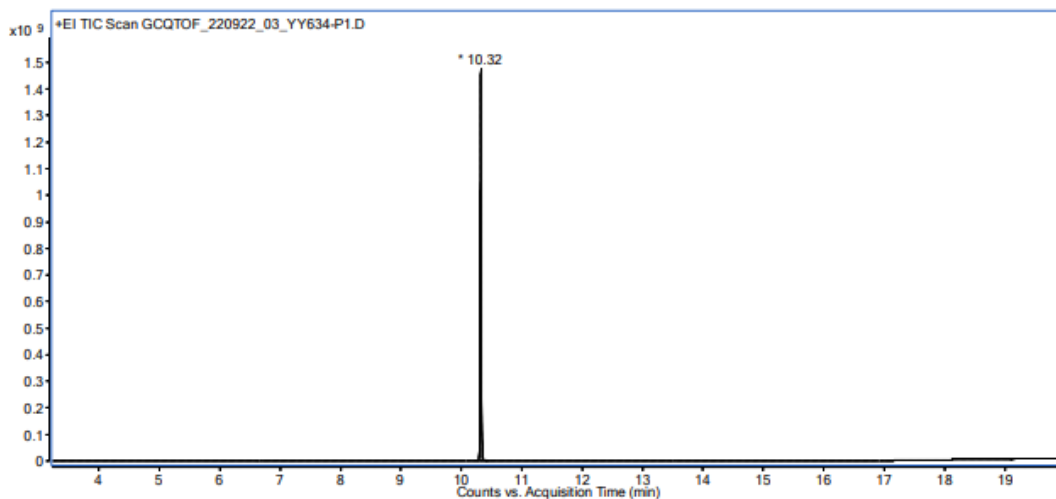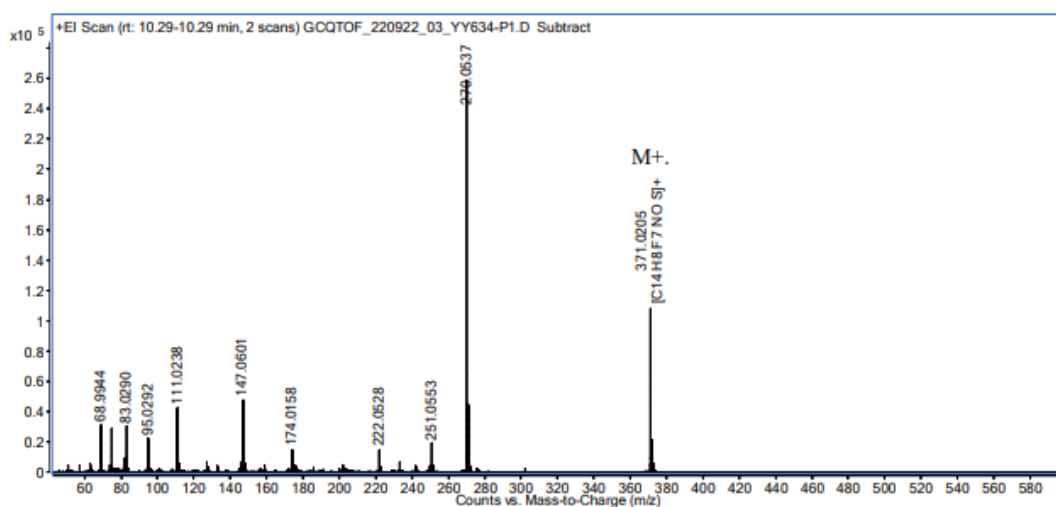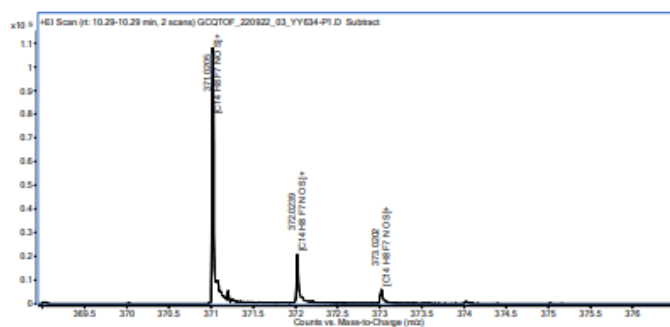

| m/z      | Formula (M) | m/z (Calc) | Diff (ppm) | [M] <sup>+</sup> |
|----------|-------------|------------|------------|------------------|
| 371.0205 | C14H8F7NOS  | 371.0209   | -1.1       | [M] <sup>+</sup> |

**N-(4-(4-chlorophenoxy)phenyl)-N,S-bis(trifluoromethyl)thiohydroxylamine (3ac)**

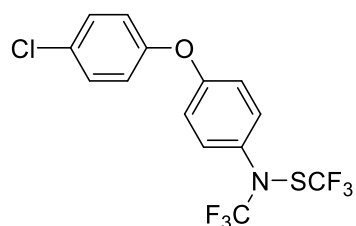

The compound **3ac** was obtained as a colorless oil in 84% yield using 1-chloro-4-(4-

isothiocyanatophenoxy)benzene following the general procedure F after column chromatography on silica gel with pentane.

$^1\text{H}$  NMR (300 MHz, Chloroform-*d*)  $\delta$  7.36 – 7.27 (m, 4H), 7.01 – 6.93 (m, 4H).

$^{19}\text{F}$  NMR (282 MHz, Chloroform-*d*)  $\delta$  -51.6 (q,  $J = 3.4$  Hz), -56.9 (q,  $J = 3.4$  Hz).

$^{13}\text{C}\{^1\text{H}\}$  NMR (75 MHz, Chloroform-*d*)  $\delta$  157.4, 154.7, 137.0, 130.0, 129.3, 129.1, 128.5 (q,  $J = 315.8$  Hz), 122.0 (q,  $J = 260.4$  Hz), 120.9, 118.9.

HRMS (EI) calculated for  $\text{C}_{14}\text{H}_8\text{ClF}_6\text{NOS}$ : 386.9914  $[\text{M}]^+$ , Found: 386.9906.

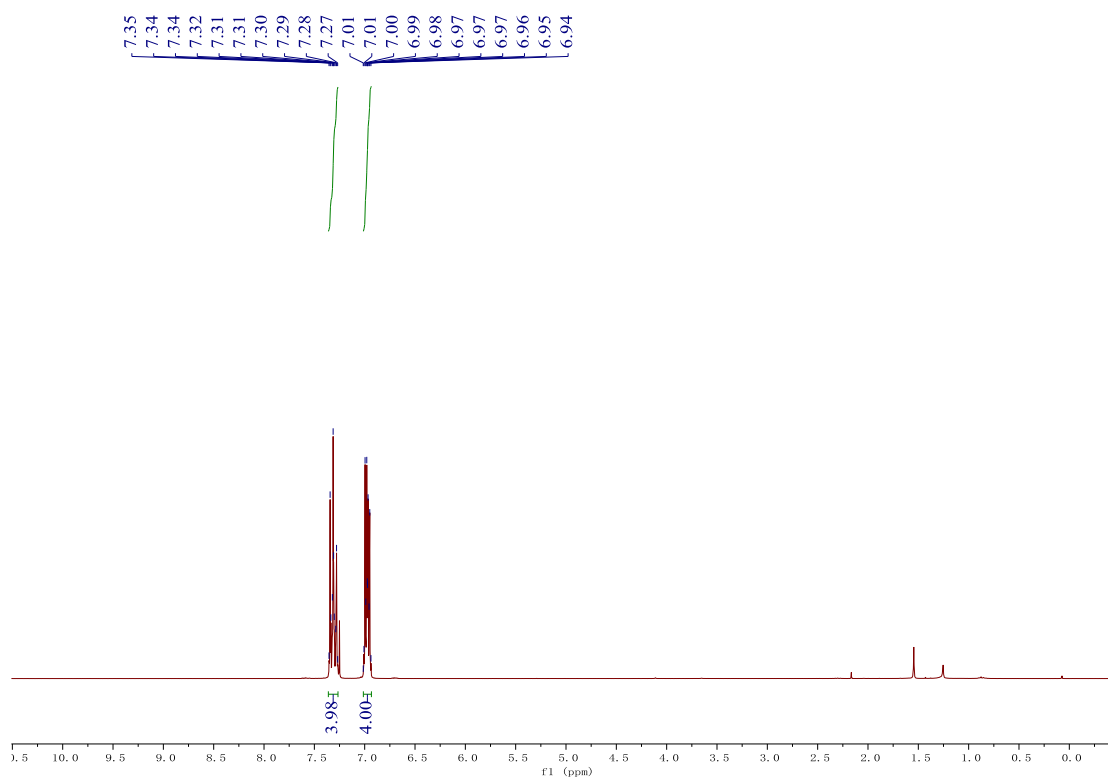

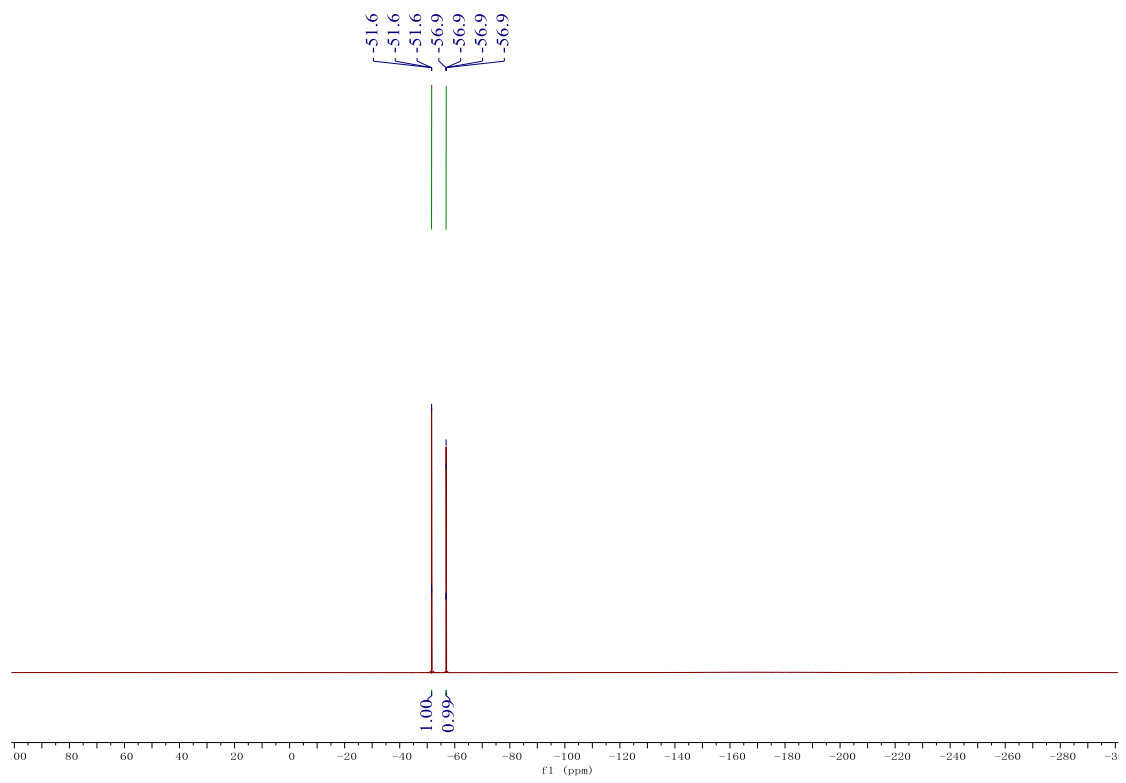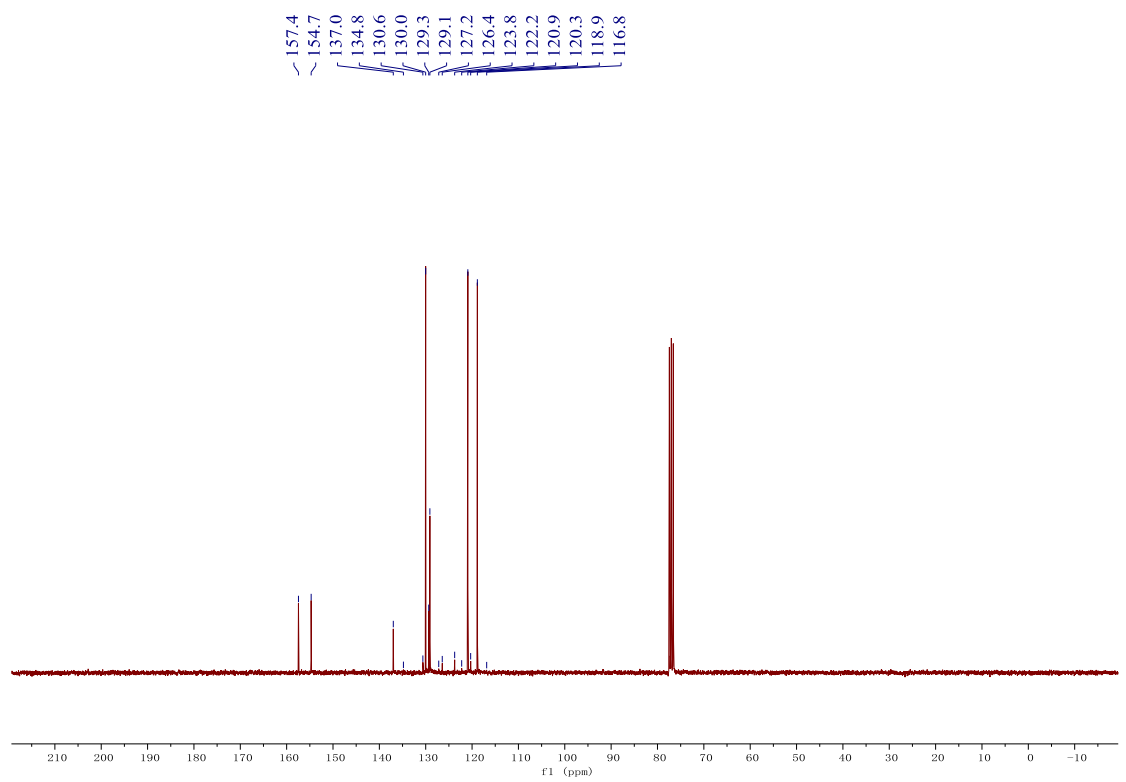

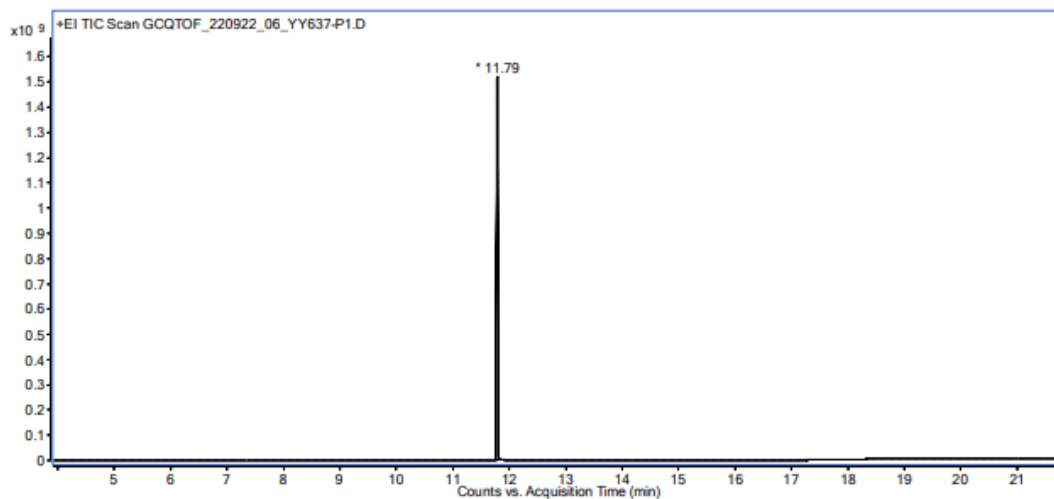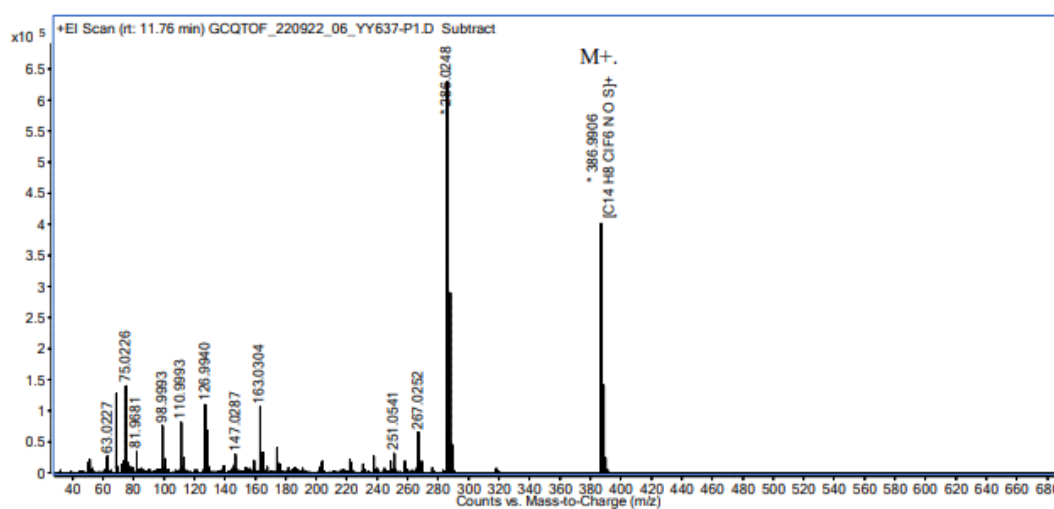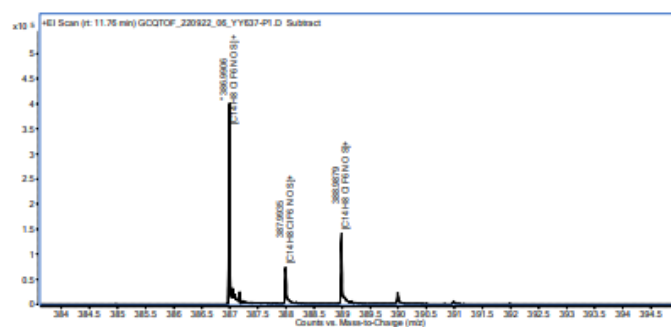

| m/z      | Formula (M)  | m/z (Calc) | Diff (ppm) | [M] <sup>+</sup> |
|----------|--------------|------------|------------|------------------|
| 386.9906 | C14H8ClF6NOS | 386.9914   | -2.1       | [M] <sup>+</sup> |

**N-(4-(4-bromophenoxy)phenyl)-N,S-bis(trifluoromethyl)thiohydroxylamine (3ad)**

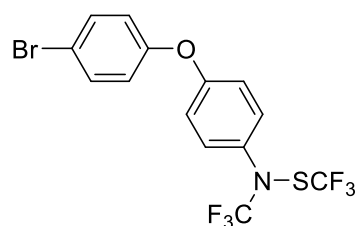

The compound **3ad** was obtained as a colorless oil in 90% yield using 1-bromo-4-(4-

isothiocyanatophenoxy)benzene following the general procedure F after column chromatography on silica gel with pentane.

$^1\text{H}$  NMR (300 MHz, Chloroform-*d*)  $\delta$  7.51 – 7.44 (m, 2H), 7.33 – 7.26 (m, 2H), 7.00 – 6.90 (m, 4H).

$^{19}\text{F}$  NMR (282 MHz, Chloroform-*d*)  $\delta$  -51.6 (q,  $J = 3.4$  Hz), -56.9 (q,  $J = 3.4$  Hz).

$^{13}\text{C}\{^1\text{H}\}$  NMR (75 MHz, Chloroform-*d*)  $\delta$  157.3, 155.3, 137.1, 133.0, 129.1, 128.5 (q,  $J = 315.8$  Hz), 122.0 (q,  $J = 260.5$  Hz), 121.3, 119.0, 116.8.

HRMS (EI) calculated for  $\text{C}_{14}\text{H}_8\text{BrF}_6\text{NOS}$ : 430.9409  $[\text{M}]^+$ , Found: 430.9407.

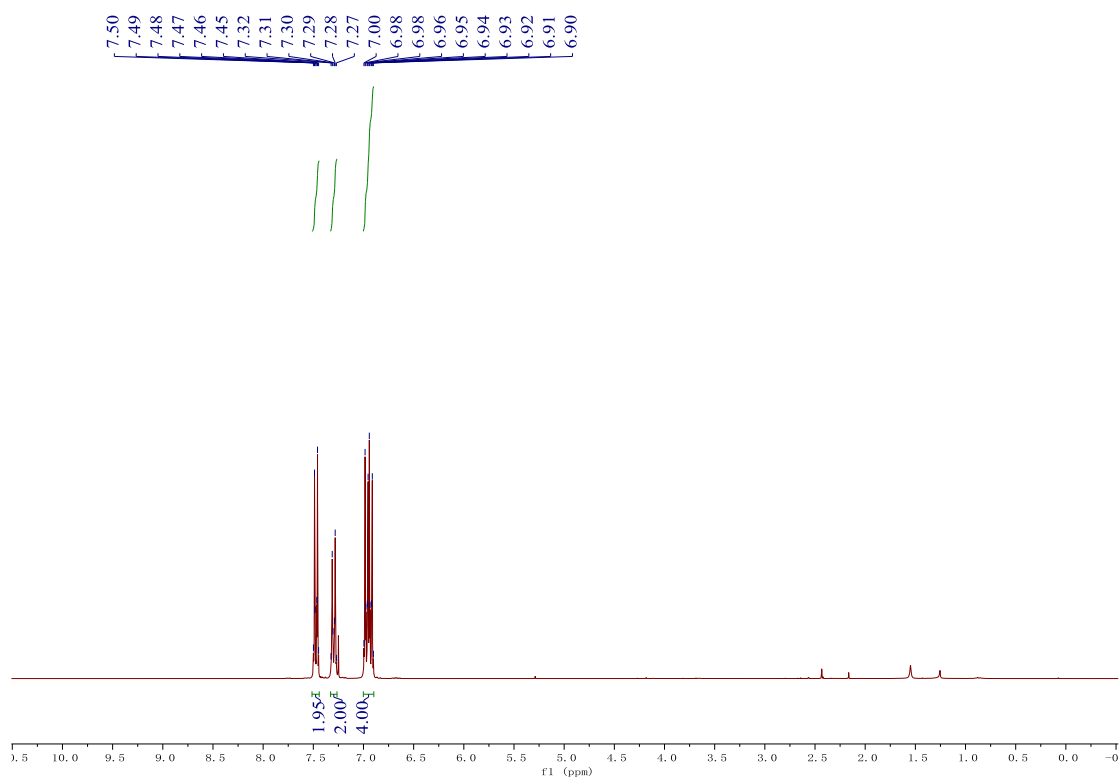



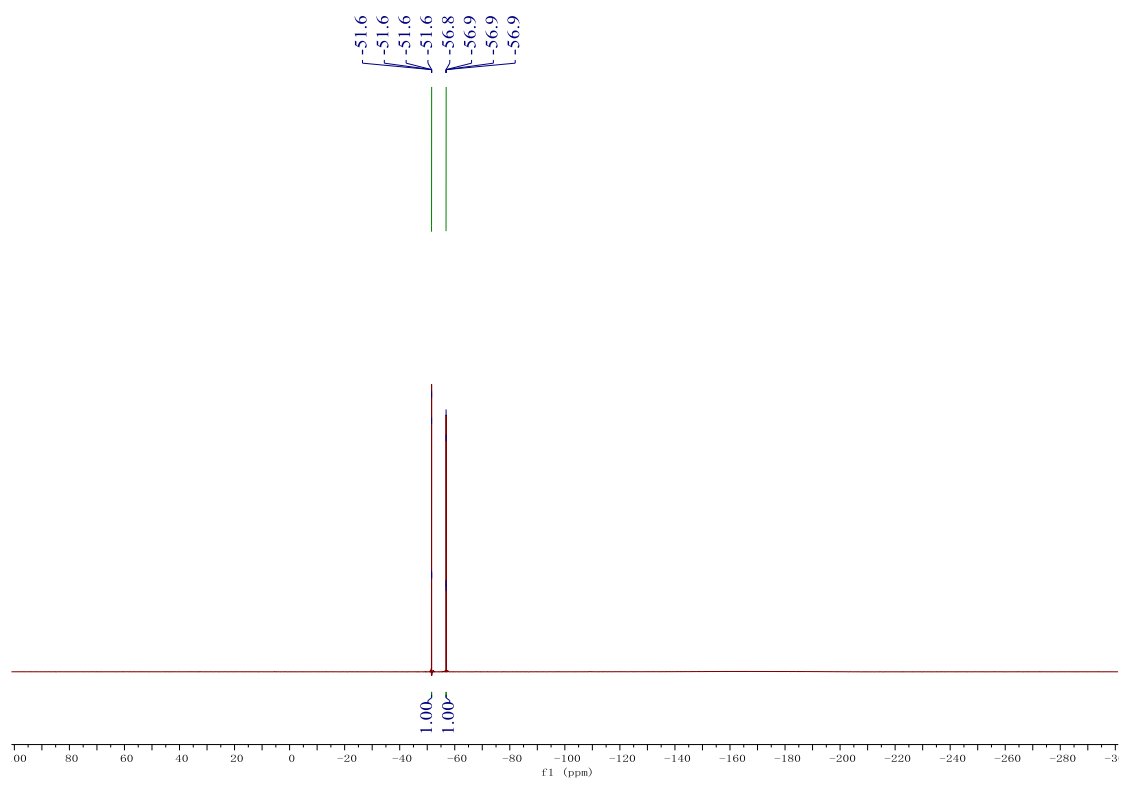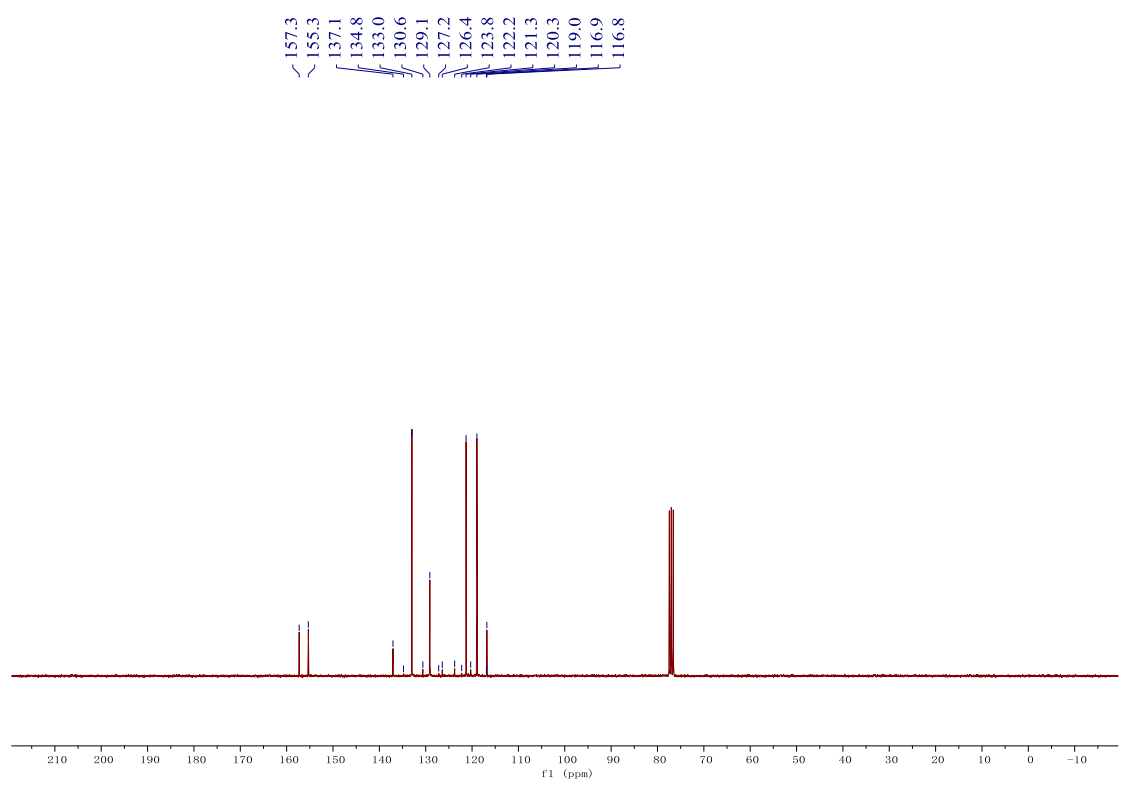

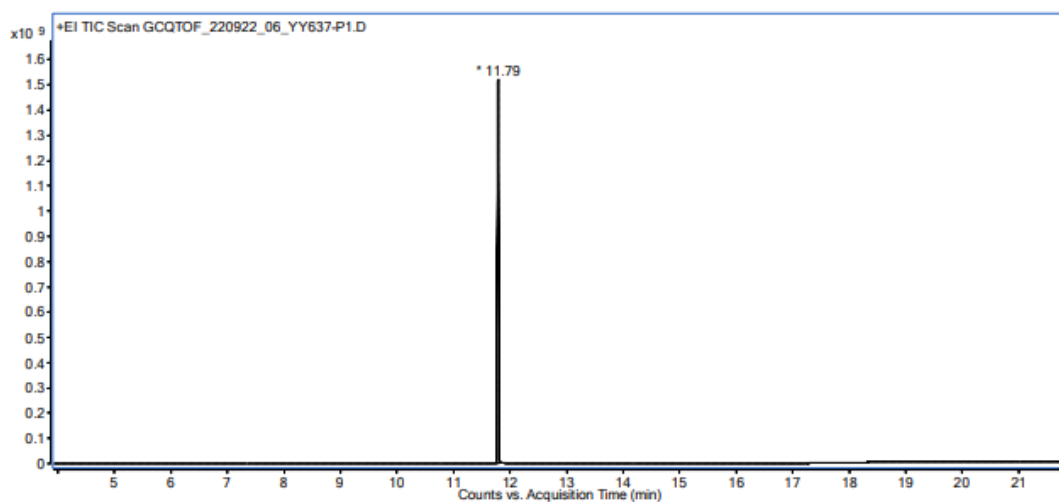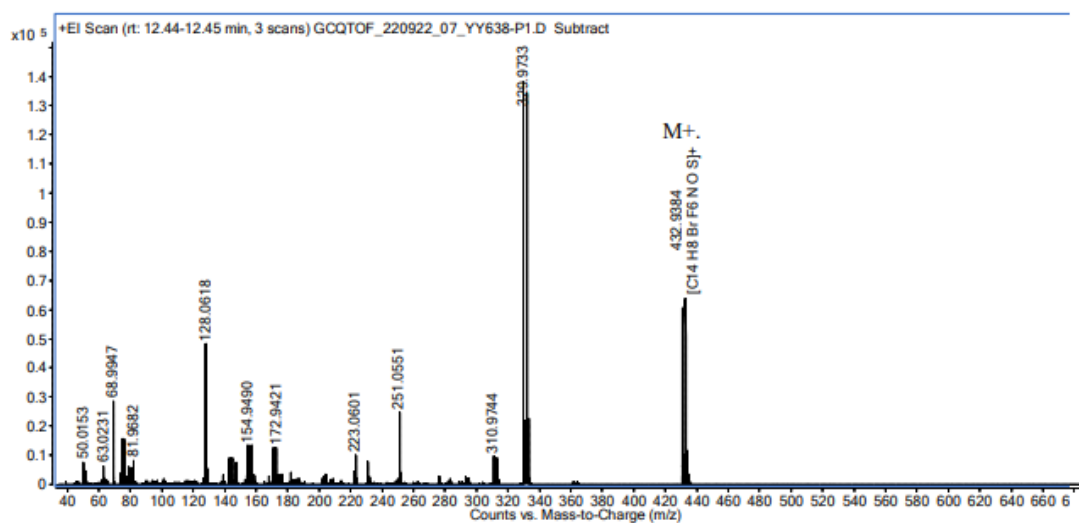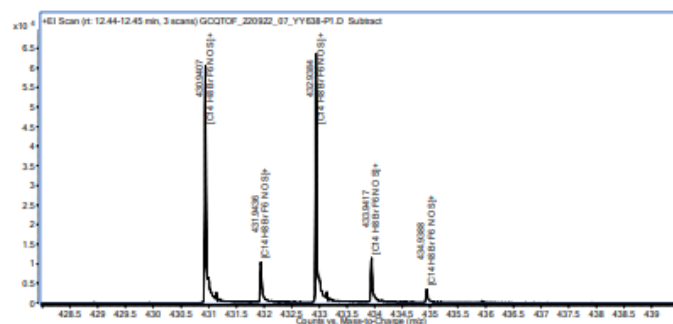

| m/z      | Formula (M)  | m/z (Calc) | Diff (ppm) | [M] <sup>+</sup> |
|----------|--------------|------------|------------|------------------|
| 430.9407 | C14H8BrF6NOS | 430.9409   | -0.5       | [M] <sup>+</sup> |

### N-(4-(methylthio)phenyl)-N,S-bis(trifluoromethyl)thiohydroxylamine (3ae)

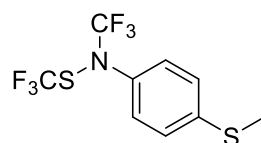

The compound **3ae** was obtained as a colorless oil in 68% yield using (4-isothiocyanatophenyl) (methyl)sulfane following the general procedure F after column chromatography on silica gel with pentane.

$^1\text{H}$  NMR (300 MHz, Chloroform-*d*)  $\delta$  7.18 – 7.17 (m, 4H), 2.42 (s, 3H).

$^{19}\text{F}$  NMR (282 MHz, Chloroform-*d*)  $\delta$  -51.5 (q,  $J = 3.4$  Hz), -56.7 (q,  $J = 3.4$  Hz).

$^{13}\text{C}\{^1\text{H}\}$  NMR (75 MHz, Chloroform-*d*)  $\delta$  140.1, 138.8, 128.5 (q,  $J = 316.3$  Hz), 127.6, 126.9, 122.0 (q,  $J = 260.6$  Hz), 15.5.

HRMS (EI) calculated for  $\text{C}_9\text{H}_7\text{F}_6\text{NS}_2$ : 306.9919  $[\text{M}]^+$ , Found: 306.9918.

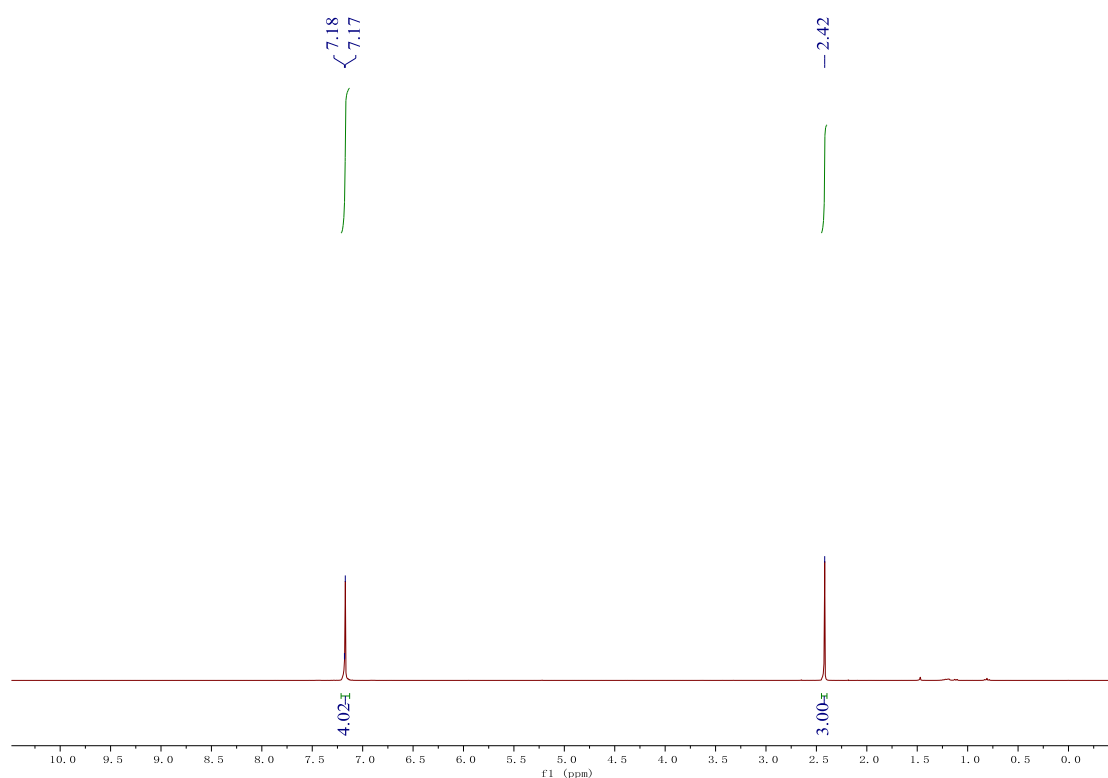

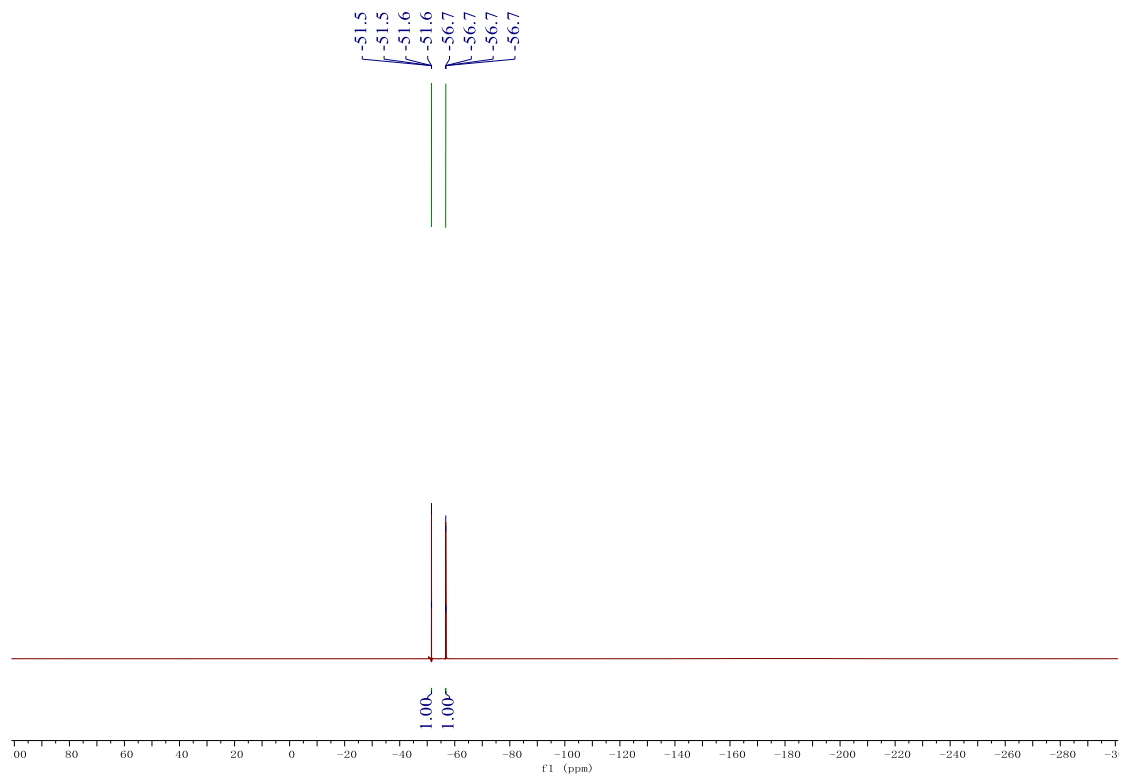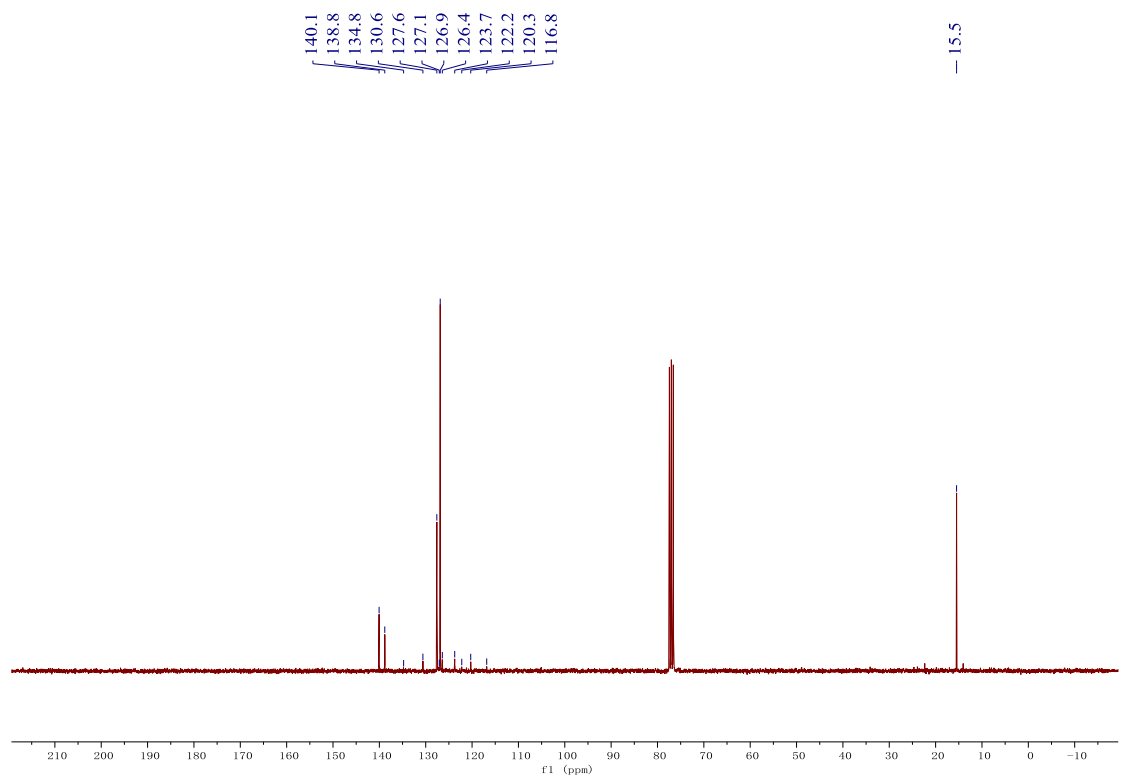

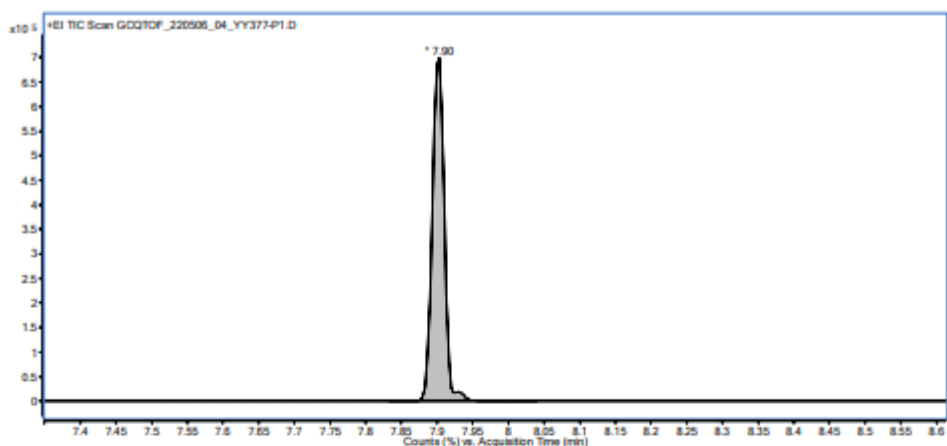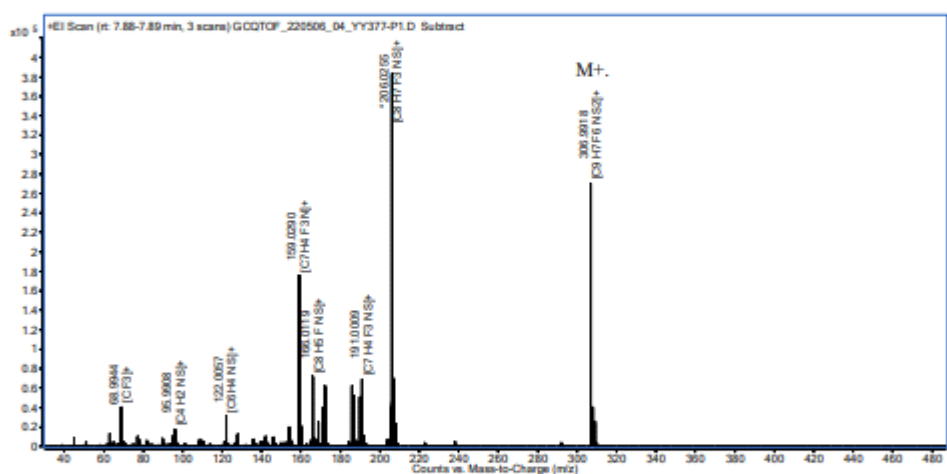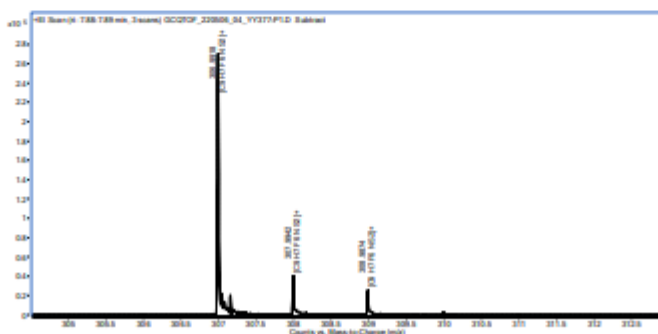

| m/z      | Formula (M) | m/z (Calc) | Diff (ppm) |
|----------|-------------|------------|------------|
| 306.9918 | C9H7F6NS2   | 306.9919   | -0.3       |

**benzyl (2S,5R,6R)-3,3-dimethyl-7-oxo-6-((trifluoromethyl)((trifluoromethyl)thio)amino)-4-thia-1-azabicyclo[3.2.0]heptane-2-carboxylate (3af)**

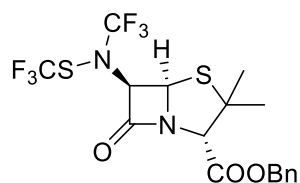

The compound **3af** was obtained as a colorless oil in 33% yield using benzyl (2S,5R,6R)-6-isothiocyanato-3,3-dimethyl-7-oxo-4-thia-1-azabicyclo[3.2.0]heptane-2-carboxylate following the

general procedure F after column chromatography on silica gel with pentane.

$[\alpha]_D = +20.5$  (c = 1,  $\text{CHCl}_3$ ,  $25^\circ\text{C}$ )

$^1\text{H}$  NMR (300 MHz, Chloroform-*d*)  $\delta$  7.39 – 7.35 (m, 5H), 5.51 (d,  $J = 3.5$  Hz, 1H), 5.34 (d,  $J = 3.2$  Hz, 1H), 5.19 (s, 2H), 4.60 (s, 1H), 1.74 (s, 3H), 1.44 (s, 3H).

$^{19}\text{F}$  NMR (282 MHz, Chloroform-*d*)  $\delta$  -52.7 (q,  $J = 3.4$  Hz), -60.0 (q,  $J = 3.4$  Hz).

$^{13}\text{C}\{^1\text{H}\}$  NMR (75 MHz, Chloroform-*d*)  $\delta$  167.2, 166.2, 134.6, 128.8, 128.8, 127.4 (d,  $J = 315.0$  Hz), 122.2 (q,  $J = 262.9$  Hz), 70.9, 68.8, 68.4, 67.6, 66.5, 32.1, 27.5.

HRMS (ESI) calculated for  $\text{C}_{17}\text{H}_{17}\text{F}_6\text{N}_2\text{O}_3\text{S}_2$ : 475.0579  $[\text{M}+\text{H}]^+$ , Found: 475.0580.

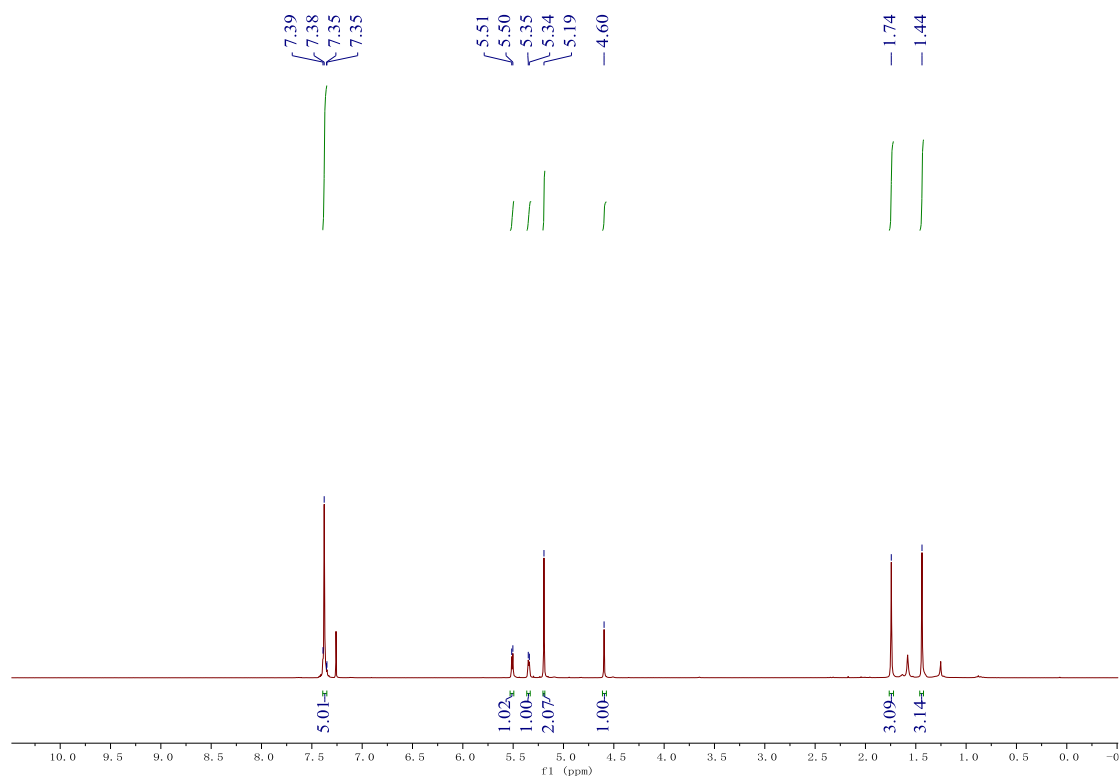

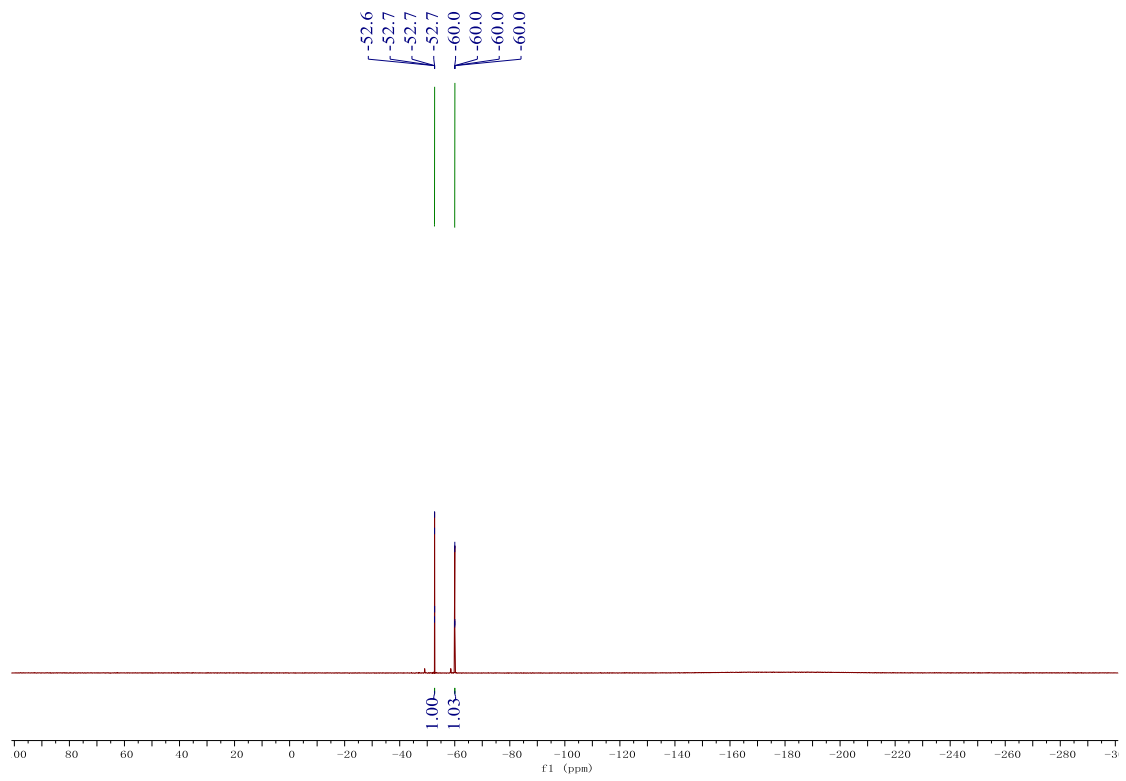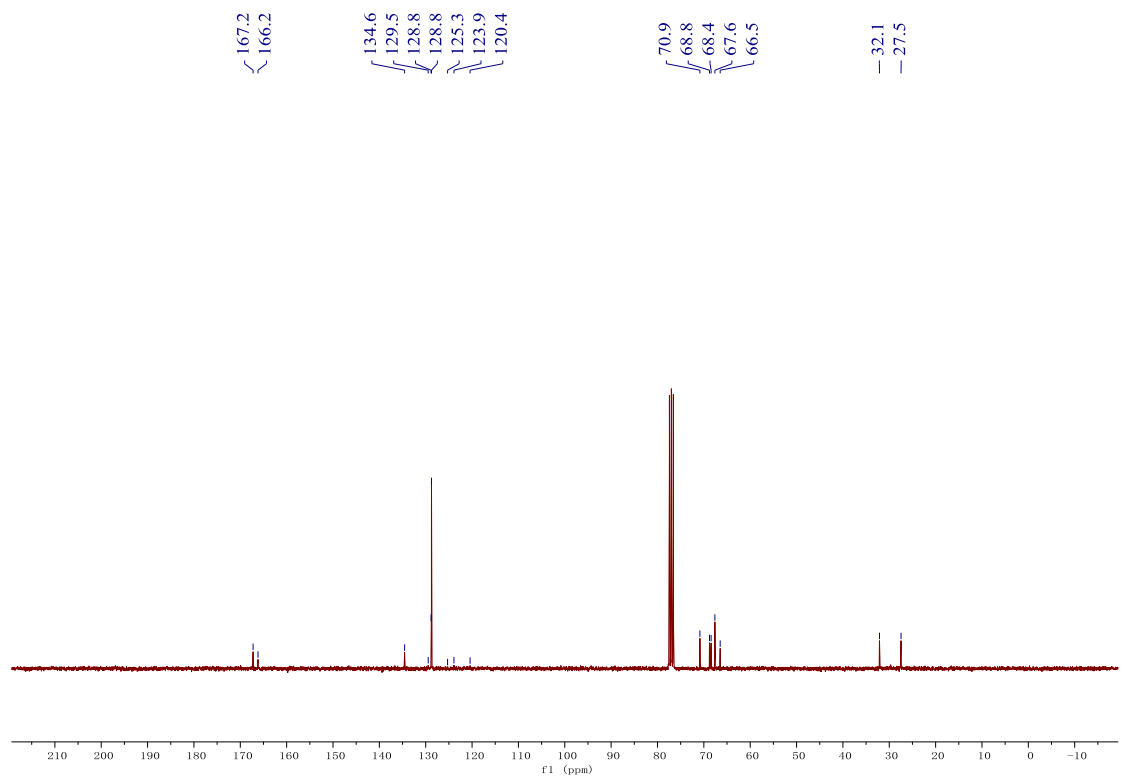

$^1\text{H}$ - $^1\text{H}$  NOESY:

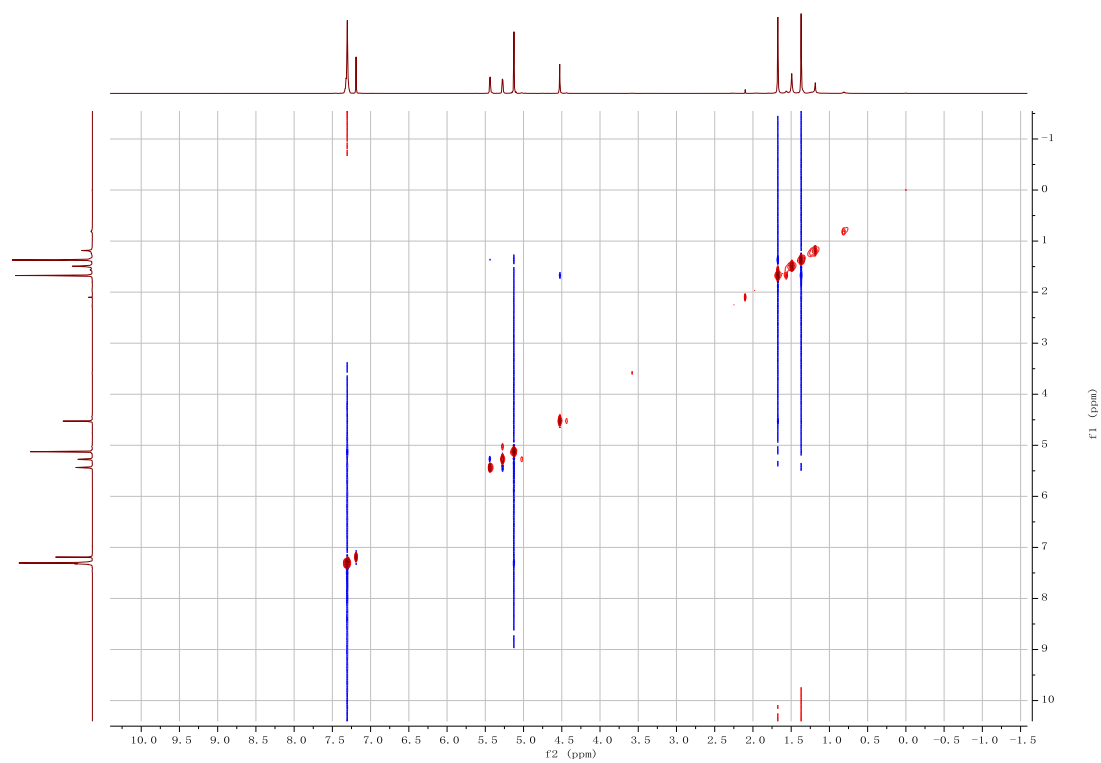

$^1\text{H}$ - $^{19}\text{F}$  NOESY:

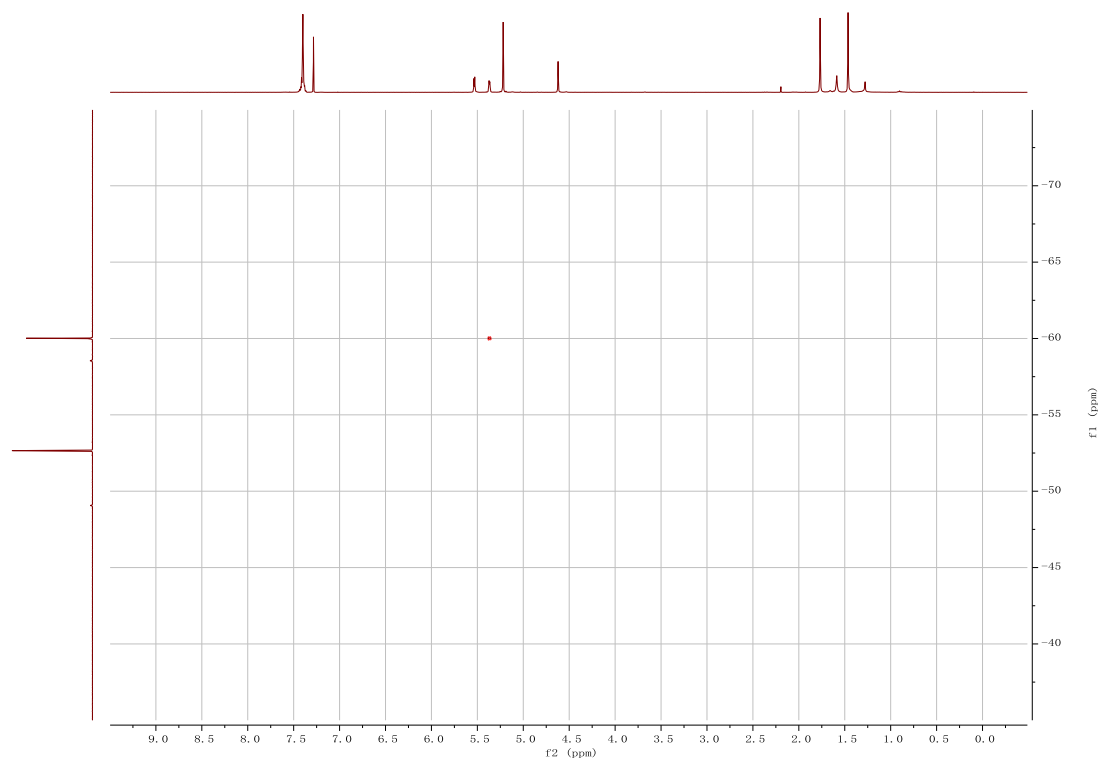



CENTRE COMMUN DE SPECTROMETRIE DE MASSE

**Analysis Info**

Analysis Name Impact2\_220609\_02\_YY465-P1.d  
 Method Tune\_pos\_Standard.m  
 Comment  
 Acquisition Date 6/9/2022 10:09:58 AM  
 Instrument / Ser# impact II 1825265.1  
 0081

**Acquisition Parameter**

|             |          |                       |           |                  |           |
|-------------|----------|-----------------------|-----------|------------------|-----------|
| Source Type | ESI      | Ion Polarity          | Positive  | Set Nebulizer    | 0.3 Bar   |
| Focus       | Active   | Set Capillary         | 2500 V    | Set Dry Heater   | 200 °C    |
| Scan Begin  | 50 m/z   | Set End Plate Offset  | -500 V    | Set Dry Gas      | 4.0 l/min |
| Scan End    | 1000 m/z | Set Collision Cell RF | 750.0 Vpp | Set Divert Valve | Source    |

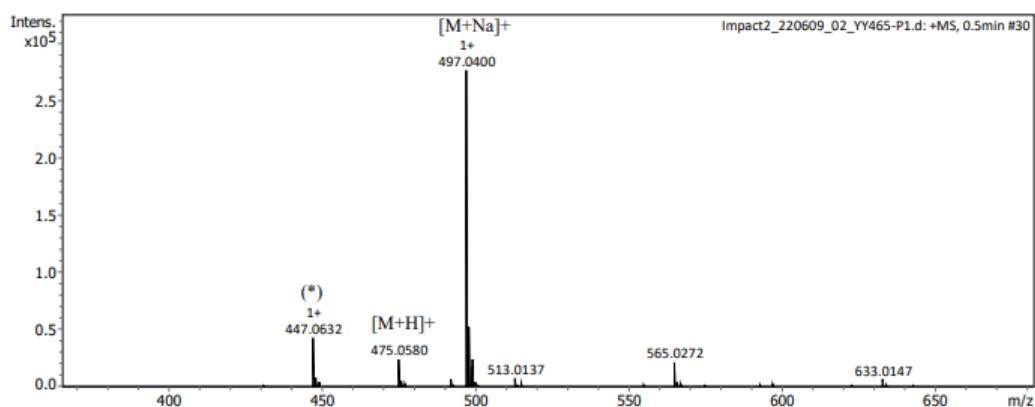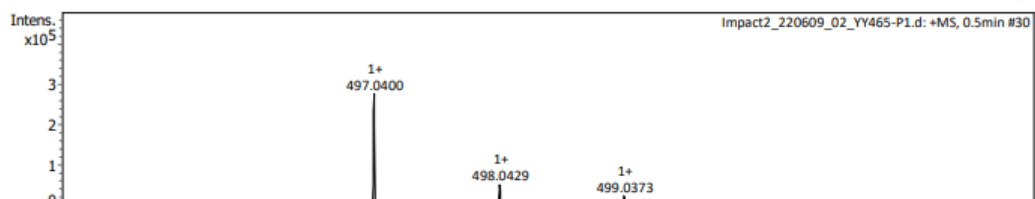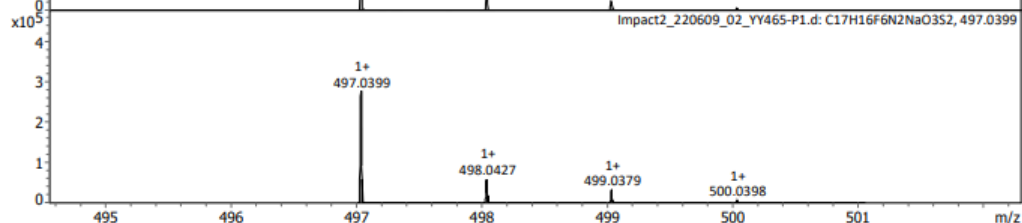

| Meas. m/z | Ion Formula      | m/z      | Sum Formula    | err [ppm] | mSigma | Adduct | z  |
|-----------|------------------|----------|----------------|-----------|--------|--------|----|
| 475.0580  | C17H17F6N2O3S2   | 475.0579 | C17H16F6N2O3S2 | -0.2      | 10.2   | M+H    | 1+ |
| 497.0400  | C17H16F6N2NaO3S2 | 497.0399 | C17H16F6N2O3S2 | -0.2      | 18.5   | M+Na   | 1+ |

**(1R,2S,5R)-2-isopropyl-5-methylcyclohexyl 4-((trifluoromethyl)((trifluoromethyl)thio)amino)benzoate (3ag)**

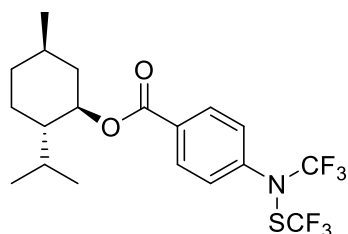

The compound **3ag** was obtained as a colorless oil in 56% yield using (1R,2S,5R)-2-isopropyl-5-methylcyclohexyl 4-isothiocyanatobenzoate following the general procedure F after column chromatography on silica gel with pentane.

$^1\text{H}$  NMR (300 MHz, Chloroform-*d*)  $\delta$  8.09 – 8.02 (m, 2H), 7.40 (d,  $J = 8.4$  Hz, 2H), 4.96 – 4.88 (m, 1H), 2.13 – 2.06 (m, 1H), 1.97 – 1.87 (m, 1H), 1.76 – 1.67 (m, 2H), 1.61 – 1.48 (m, 3H), 1.15 – 1.01 (m, 2H), 0.92 (d,  $J = 3.1$  Hz, 3H), 0.89 (d,  $J = 3.6$  Hz, 3H), 0.77 (d,  $J = 6.9$  Hz, 3H).

$^{19}\text{F}$  NMR (282 MHz, Chloroform-*d*)  $\delta$  -51.1 (q,  $J = 3.4$  Hz), -56.1 (q,  $J = 3.4$  Hz).

$^{13}\text{C}\{^1\text{H}\}$  NMR (75 MHz, Chloroform-*d*)  $\delta$  164.9, 145.5, 131.0, 130.6, 128.4 (q,  $J = 314.2$  Hz), 125.8, 121.8 (d,  $J = 261.8$  Hz), 75.4, 47.3, 40.9, 34.3, 31.4, 26.5, 23.6, 22.0, 20.7, 16.5.

HRMS (ESI) calculated for  $\text{C}_{19}\text{H}_{23}\text{F}_6\text{NO}_2\text{S}$ : 444.1426  $[\text{M}+\text{H}]^+$ , Found: 444.1426.

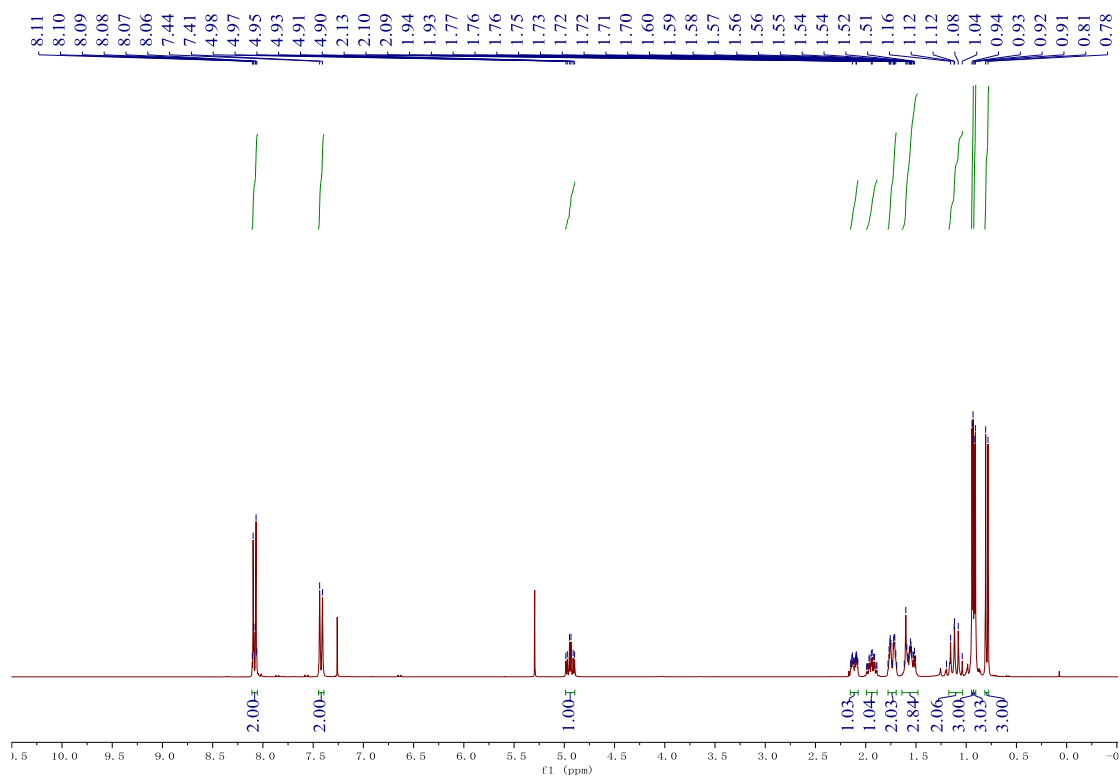

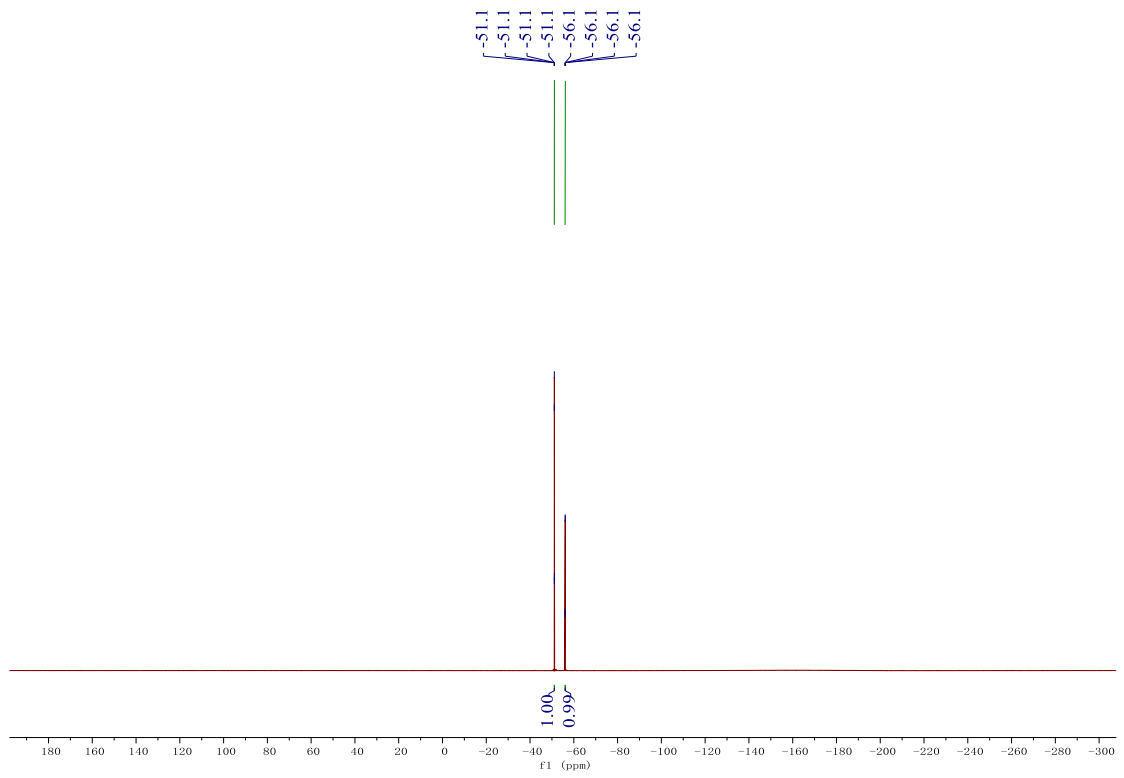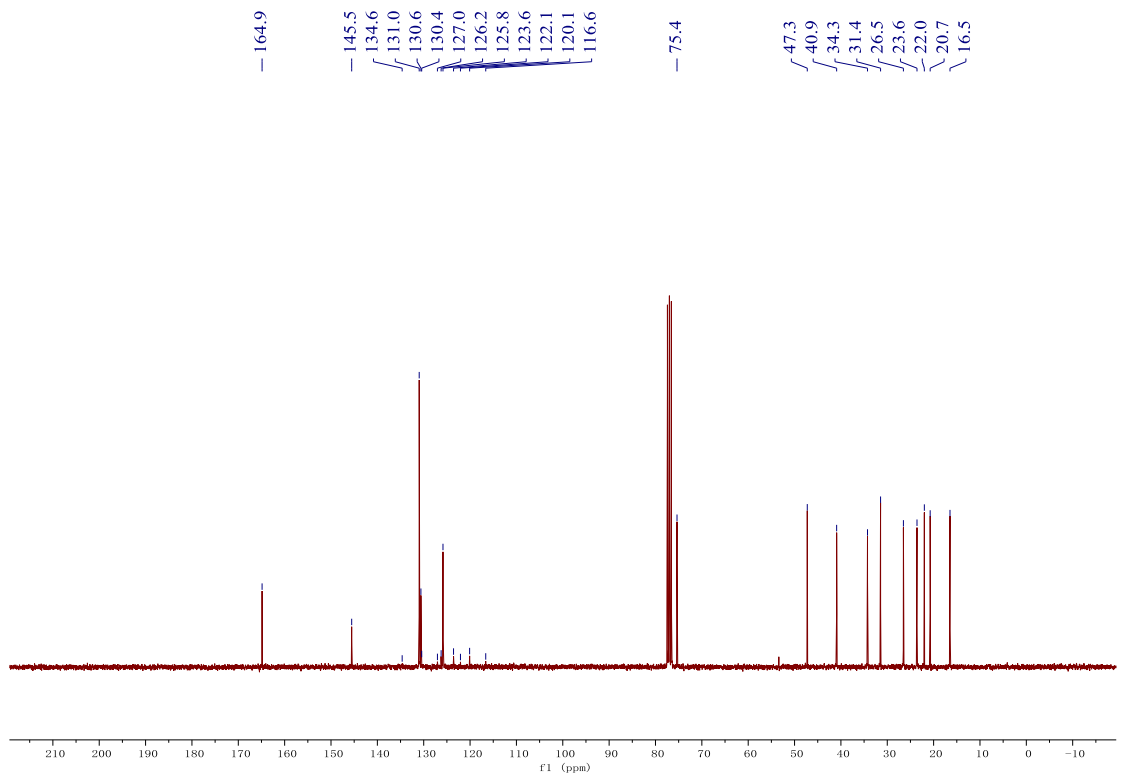

CENTRE COMMUN DE SPECTROMETRIE DE MASSE

**Analysis Info**

Analysis Name Impact2\_220922\_02\_YY621-P1.d  
 Method Tune\_pos\_Standard.m  
 Comment  
 Acquisition Date 9/22/2022 2:22:58 PM  
 Instrument / Ser# impact II 1825265.1  
 0081

**Acquisition Parameter**

|             |          |                       |           |                  |           |
|-------------|----------|-----------------------|-----------|------------------|-----------|
| Source Type | ESI      | Ion Polarity          | Positive  | Set Nebulizer    | 0.3 Bar   |
| Focus       | Active   | Set Capillary         | 1000 V    | Set Dry Heater   | 200 °C    |
| Scan Begin  | 50 m/z   | Set End Plate Offset  | -500 V    | Set Dry Gas      | 4.0 l/min |
| Scan End    | 1000 m/z | Set Collision Cell RF | 750.0 Vpp | Set Divert Valve | Source    |

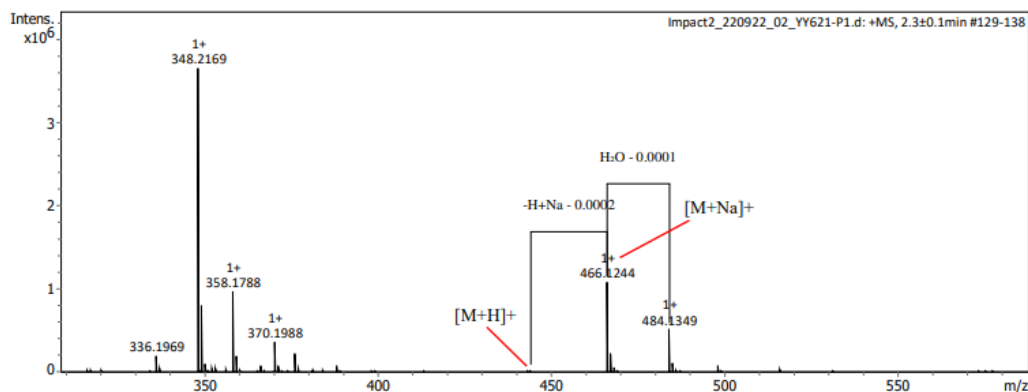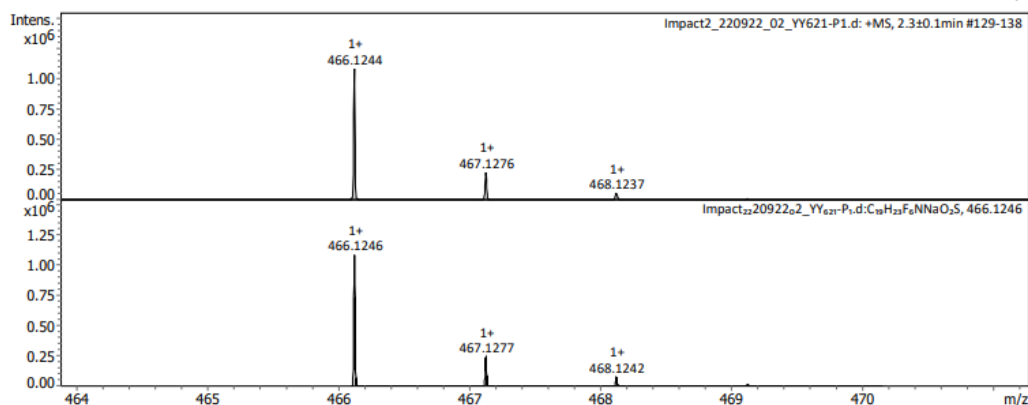

| Meas. m/z | Ion Formula                                                        | m/z      | Sum Formula                                                      | err (ppm) | mSigma | Adduct | z  |
|-----------|--------------------------------------------------------------------|----------|------------------------------------------------------------------|-----------|--------|--------|----|
| 444.1426  | C <sub>19</sub> H <sub>24</sub> F <sub>6</sub> NO <sub>2</sub> S   | 444.1426 | C <sub>19</sub> H <sub>23</sub> F <sub>6</sub> NO <sub>2</sub> S | 0.1       | 36.6   | M+H    | 1+ |
| 466.1244  | C <sub>19</sub> H <sub>23</sub> F <sub>6</sub> NNaO <sub>2</sub> S | 466.1246 |                                                                  | 0.4       | 11.7   | M+Na   | 1+ |

**((3aS,5aR,8aR,8bS)-2,2,7,7-tetramethyltetrahydro-3aH-bis([1,3]dioxolo)[4,5-b:4',5'-d]pyran-3a-yl)methyl 4-((trifluoromethyl)((trifluoromethyl)thio)amino)benzoate (3a)**

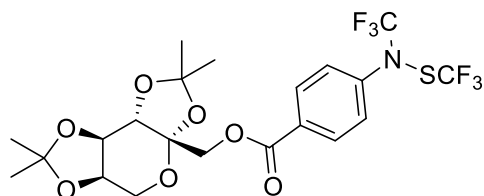

The compound **3a** was obtained as a colorless oil in 69% yield using ((3aS,5aR,8aR,8bS)-2,2,7,7-tetramethyltetrahydro-3aH-bis([1,3]dioxolo)[4,5-b:4',5'-d]pyran-3a-yl)methyl 4-isothiocyanatobenzoate following the general procedure F after column chromatography on silica gel with pentane/ethyl acetate (15/1).

<sup>1</sup>H NMR (300 MHz, Chloroform-*d*) δ 8.06 – 7.99 (m, 2H), 7.35 (d, *J* = 8.2 Hz, 2H), 5.49 (d, *J* = 4.9 Hz, 1H), 4.60 – 4.57 (m, 1H), 4.49 – 4.43 (m, 1H), 4.41 – 4.34 (m, 1H), 4.30 – 4.27 (m, 1H), 4.26

- 4.23 (m, 1H), 4.13 – 4.08 (m, 1H), 1.42 (d,  $J = 11.6$  Hz, 6H), 1.27 (d,  $J = 6.2$  Hz, 6H).

$^{19}\text{F}$  NMR (282 MHz, Chloroform- $d$ )  $\delta$  -51.1 (q,  $J = 3.4$  Hz), -56.0 (q,  $J = 3.4$  Hz).

$^{13}\text{C}\{^1\text{H}\}$  NMR (75 MHz, Chloroform- $d$ )  $\delta$  165.2, 145.8, 131.1, 129.7, 128.3 (q,  $J = 317.6$  Hz), 125.7, 121.8 (q,  $J = 261.8$  Hz), 109.7, 108.8, 96.3, 71.1, 70.7, 70.5, 66.1, 64.3, 26.0, 26.0, 24.9, 24.5.

HRMS (EI) calculated for  $\text{C}_{21}\text{H}_{24}\text{F}_6\text{NO}_7\text{S}$ : 548.1172  $[\text{M}+\text{H}]^+$ , Found: 548.1178.

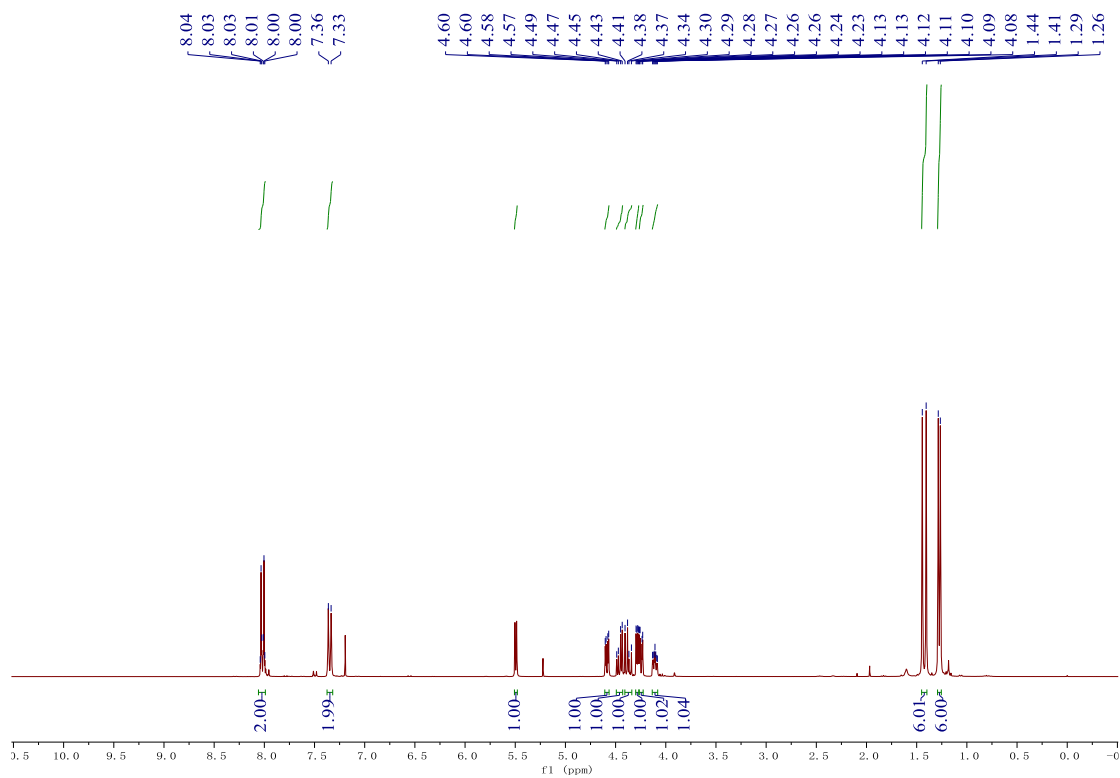

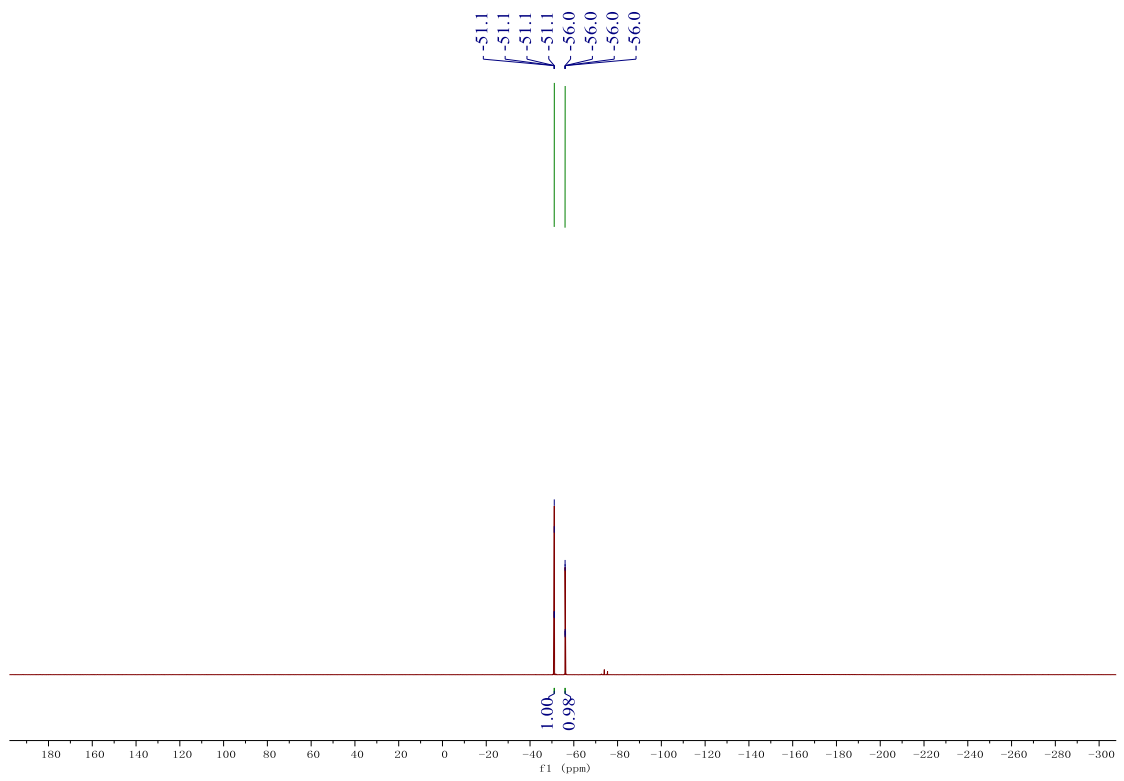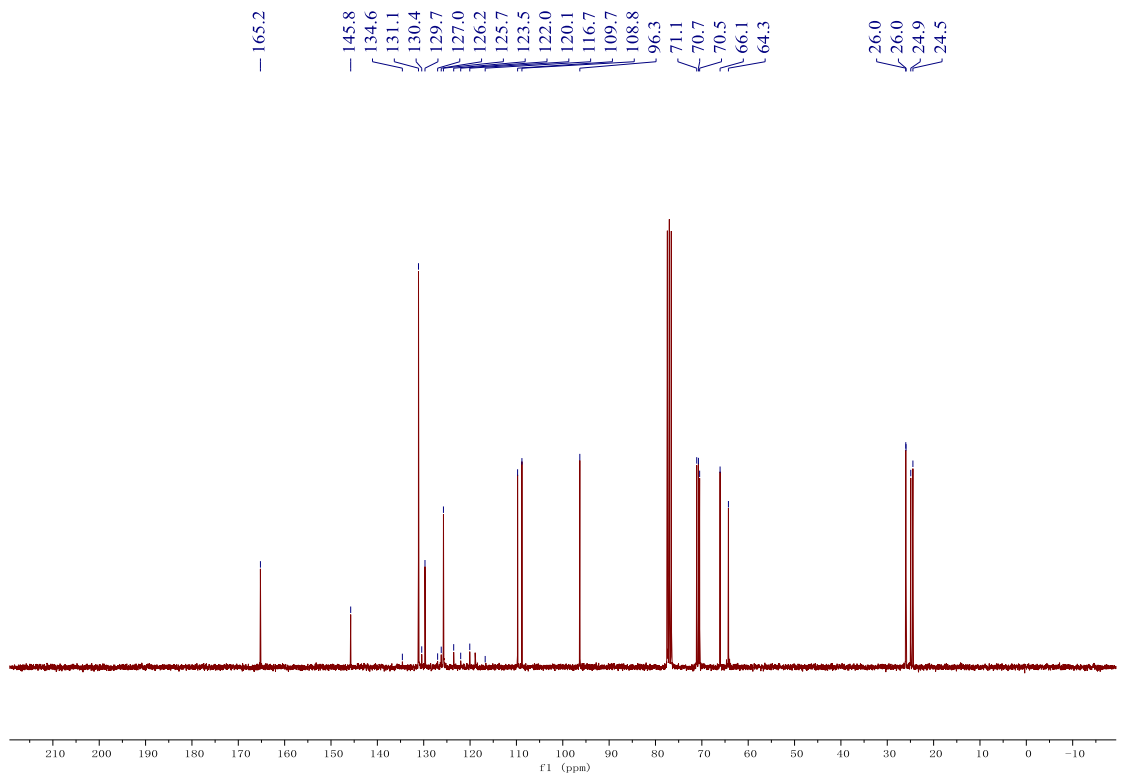

CENTRE COMMUN DE SPECTROMETRIE DE MASSE

**Analysis Info**

|               |                              |                   |                      |
|---------------|------------------------------|-------------------|----------------------|
| Analysis Name | Impact2_220929_03_YF644-P1.d | Acquisition Date  | 9/29/2022 5:18:17 PM |
| Method        | Tune_pos_Standard.m          | Instrument / Ser# | impact II 1825265.1  |
| Comment       |                              |                   | 0081                 |

**Acquisition Parameter**

|             |          |                       |            |                  |           |
|-------------|----------|-----------------------|------------|------------------|-----------|
| Source Type | ESI      | Ion Polarity          | Positive   | Set Nebulizer    | 0.3 Bar   |
| Focus       | Active   | Set Capillary         | 1000 V     | Set Dry Heater   | 200 °C    |
| Scan Begin  | 50 m/z   | Set End Plate Offset  | -500 V     | Set Dry Gas      | 4.0 l/min |
| Scan End    | 1000 m/z | Set Collision Cell RF | 1500.0 Vpp | Set Divert Valve | Source    |

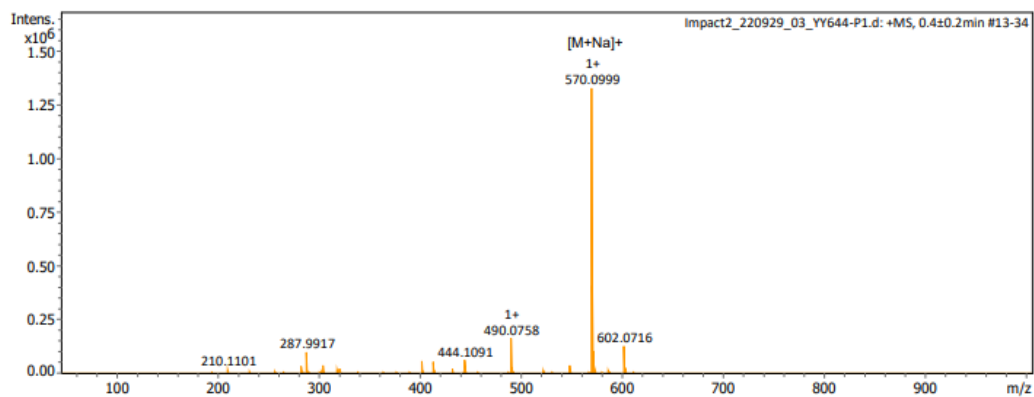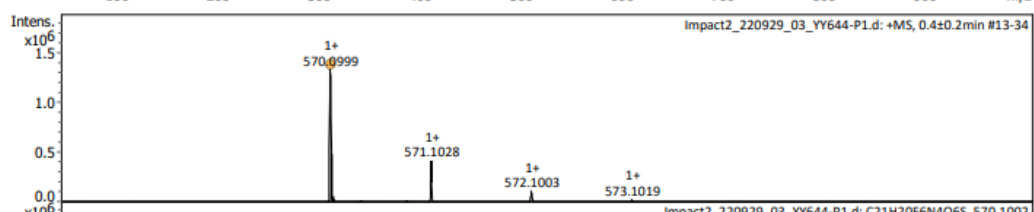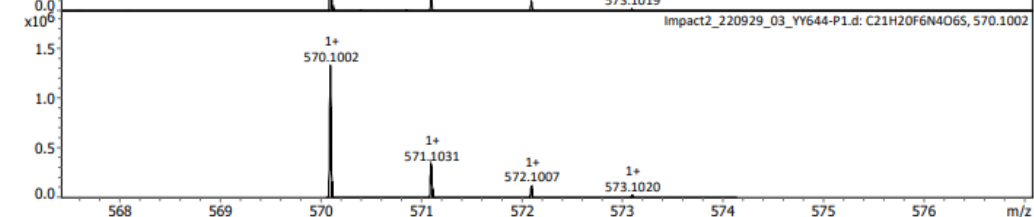

| Meas. m/z | Ion Formula                                                        | m/z      | Sum Formula                                                      | err [ppm] | mSigma | Adduct | z  |
|-----------|--------------------------------------------------------------------|----------|------------------------------------------------------------------|-----------|--------|--------|----|
| 548.1178  | C <sub>21</sub> H <sub>24</sub> F <sub>6</sub> NO <sub>7</sub> S   | 548.1172 | C <sub>21</sub> H <sub>23</sub> F <sub>6</sub> NO <sub>7</sub> S | -1.1      | 14.6   | M+H    | 1+ |
| 570.0999  | C <sub>21</sub> H <sub>23</sub> F <sub>6</sub> NNaO <sub>7</sub> S | 570.0992 |                                                                  | -1.3      | 32.5   | M+Na   | 1+ |

**(R)-2,5,7,8-tetramethyl-2-((4R,8R)-4,8,12-trimethyltridecyl)chroman-6-yl 4-((trifluoromethyl) ((trifluoromethyl)thio)amino)benzoate (3ai)**

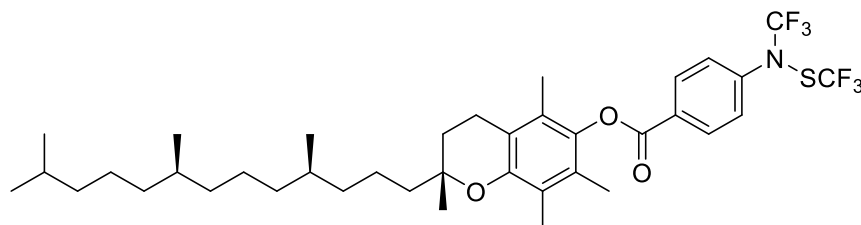

The compound **3ai** was obtained as a colorless oil in 83% yield using (R)-2,5,7,8-tetramethyl-2-((4R,8R)-4,8,12-trimethyltridecyl)chroman-6-yl 4-isothiocyanatobenzoate following the general procedure F after column chromatography on silica gel with pentane/ethyl acetate (50/1).

<sup>1</sup>H NMR (300 MHz, Chloroform-*d*) δ 8.33 – 8.26 (m, 2H), 7.52 (d, *J* = 8.4 Hz, 2H), 2.63 (t, *J* = 6.8

Hz, 2H), 2.13 (s, 3H), 2.06 (s, 3H), 2.02 (s, 3H), 1.90 – 1.87 (m, 2H), 1.60 – 1.51 (m, 3H), 1.48 – 1.36 (m, 4H), 1.30 – 1.21 (m, 11H), 1.17 – 1.03 (m, 6H), 0.90 – 0.84 (m, 12H).

$^{19}\text{F}$  NMR (282 MHz, Chloroform-*d*)  $\delta$  -51.0 (q,  $J$  = 3.4 Hz), -55.9 (q,  $J$  = 3.4 Hz).

$^{13}\text{C}\{^1\text{H}\}$  NMR (75 MHz, Chloroform-*d*)  $\delta$  164.0, 149.6, 146.1, 140.5, 131.6, 129.3, 128.4 (q,  $J$  = 317.6 Hz), 126.8, 126.0, 125.0, 123.3, 121.8 (q,  $J$  = 261.8 Hz), 117.6, 75.2, 39.4, 37.6, 37.5, 37.4, 37.3, 32.8, 32.7, 31.0, 28.0, 24.9, 24.5, 23.7, 22.7, 22.6, 21.1, 20.7, 19.8, 19.7, 19.6, 13.1, 12.2, 11.9.

HRMS (EI) calculated for  $\text{C}_{38}\text{H}_{54}\text{F}_6\text{NO}_3\text{S}$ : 718.3723  $[\text{M}+\text{H}]^+$ , Found: 718.3723.

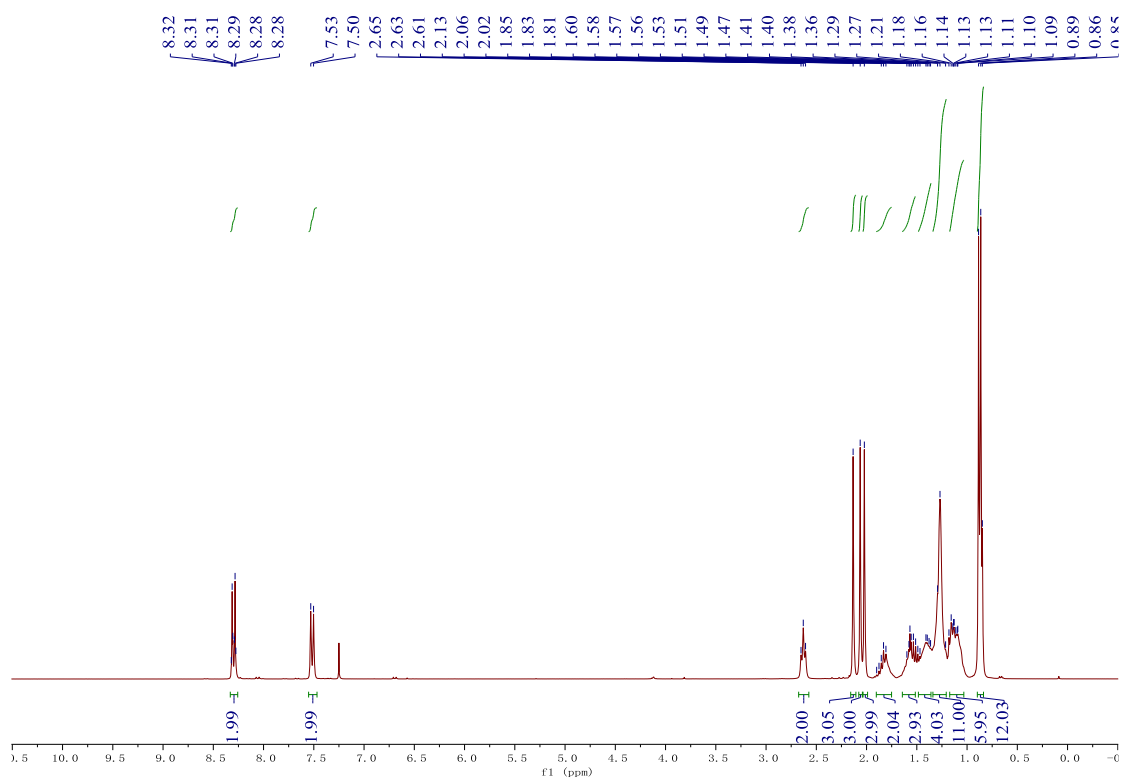



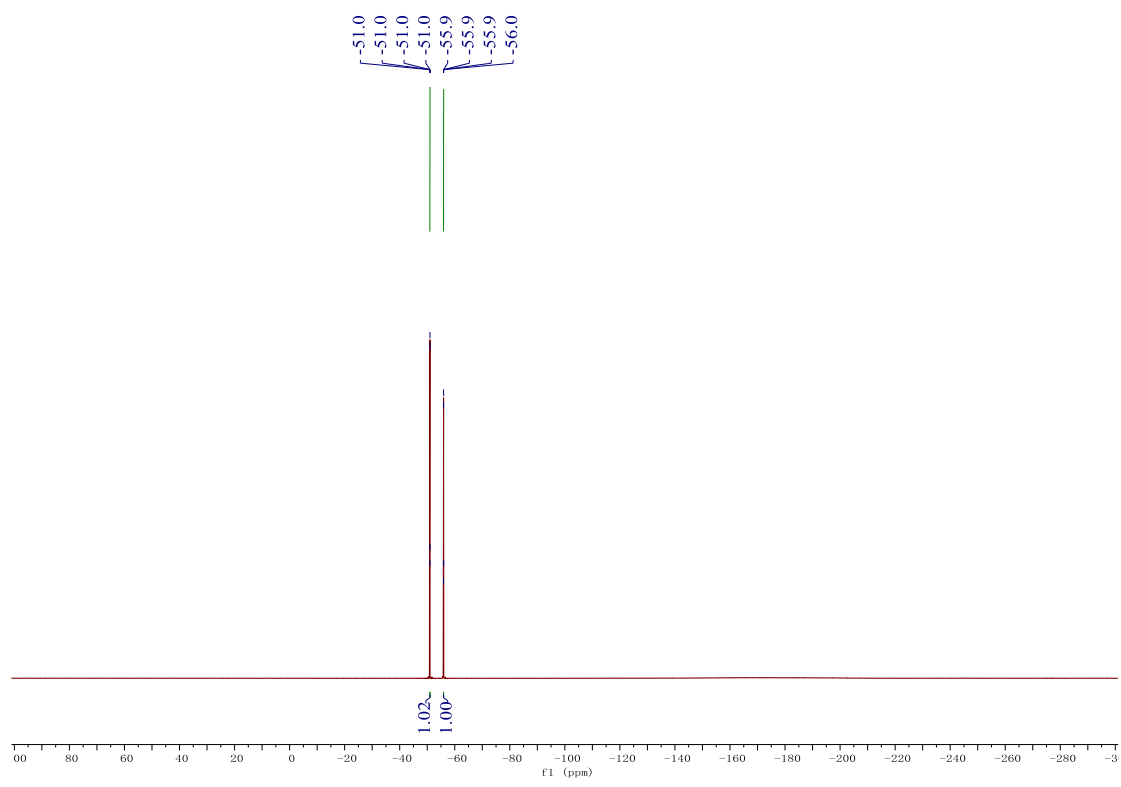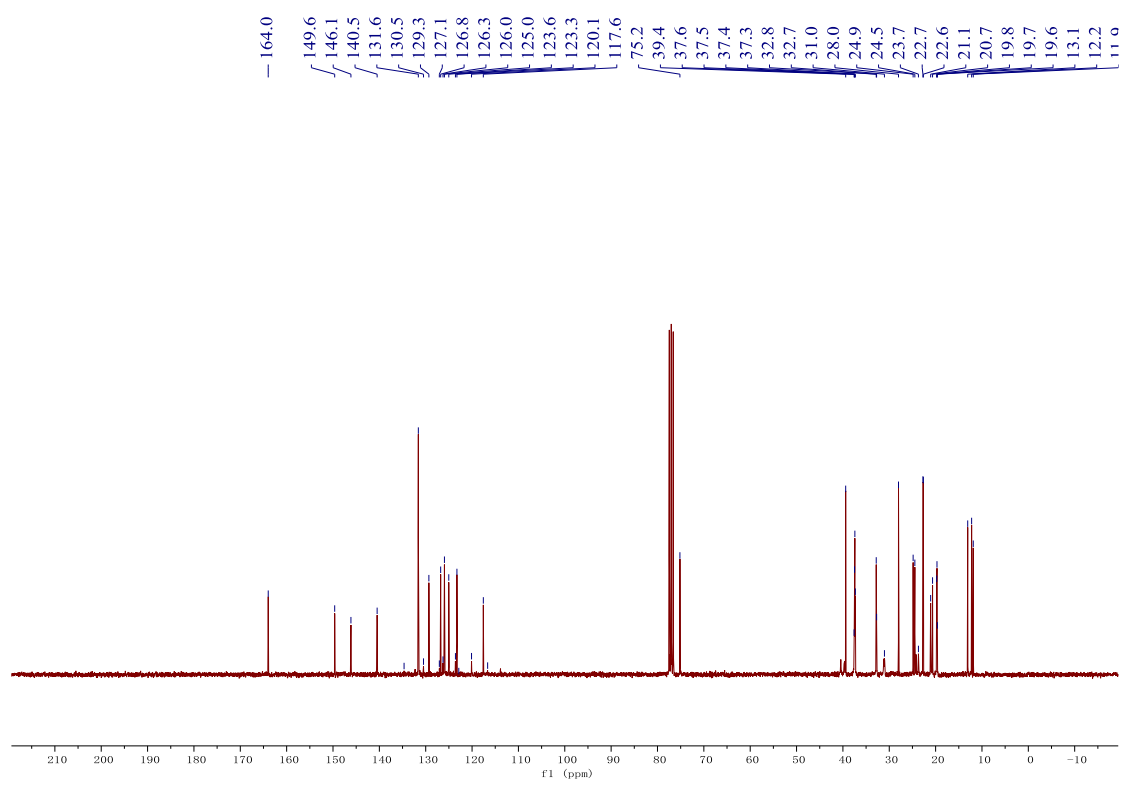

**CENTRE COMMUN DE SPECTROMETRIE DE MASSE**

**Analysis Info**

Analysis Name Impact2\_220929\_05\_YY649-P1.d  
 Method Tune\_pos\_Standard.m  
 Comment

Acquisition Date 9/29/2022 5:29:18 PM  
 Instrument / Ser# impact II 1825265.1  
 0081

**Acquisition Parameter**

|             |          |                       |            |                  |           |
|-------------|----------|-----------------------|------------|------------------|-----------|
| Source Type | ESI      | Ion Polarity          | Positive   | Set Nebulizer    | 0.3 Bar   |
| Focus       | Active   | Set Capillary         | 1500 V     | Set Dry Heater   | 200 °C    |
| Scan Begin  | 50 m/z   | Set End Plate Offset  | -500 V     | Set Dry Gas      | 4.0 l/min |
| Scan End    | 1000 m/z | Set Collision Cell RF | 1500.0 Vpp | Set Divert Valve | Source    |

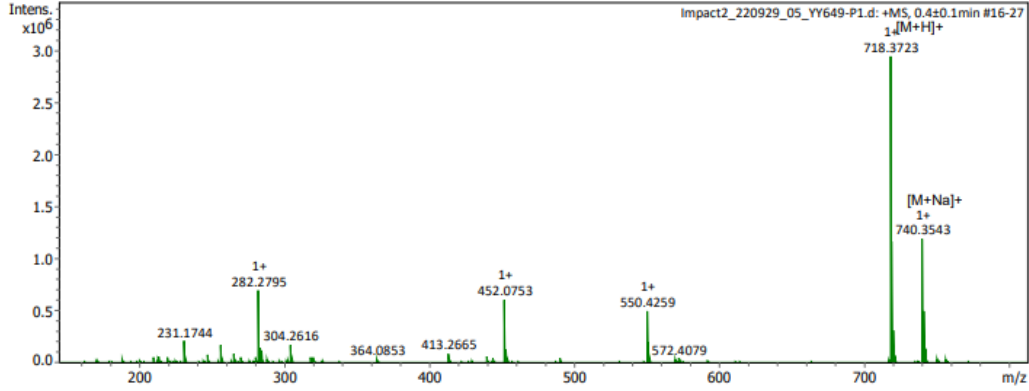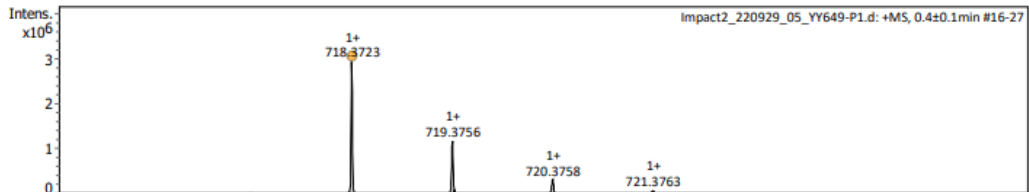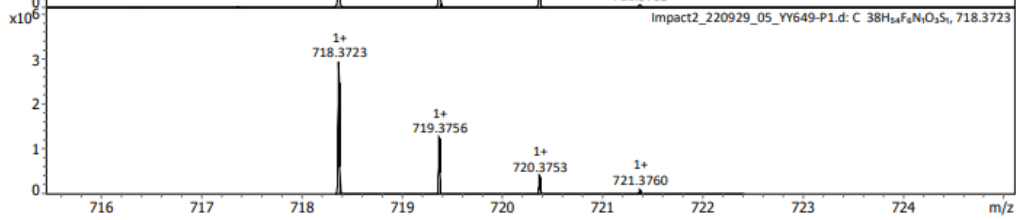

| Meas. m/z | Ion Formula    | m/z      | Sum Formula  | err [ppm] | mSigma | Adduct | z  |
|-----------|----------------|----------|--------------|-----------|--------|--------|----|
| 718.3723  | C38H54F6NO3S   | 718.3723 | C38H53F6NO3S | 0.0       | 24.1   | M+H    | 1+ |
| 740.3543  | C38H53F6NNaO3S | 740.3543 |              | -0.0      | 13.9   | M+Na   | 1+ |

## Crystallographic data collection and structure determination:

Single-crystal X-ray diffraction data collection of N(SCF<sub>3</sub>)(CF<sub>3</sub>)-amine **3m** was performed at low temperature (193 K) on a Bruker-AXS D8-Venture diffractometer equipped with a Mo K $\alpha$  sealed tube ( $\lambda = 0.71073 \text{ \AA}$ ), a multilayer TRIUMPH X-ray mirror, a Photon III-C14 detector and an Oxford Instruments Cryostream 700+ Series low-temperature device. Phi- and omega- scans were used. The data were indexed and integrated using the SAINT program<sup>11</sup> and an empirical absorption correction with SADABS was applied<sup>12</sup>. The structure was solved by dual space methods (SHELXT)<sup>13</sup> and refined using a least-squares method on  $F^2$ <sup>14</sup>. All non-H atoms were refined with anisotropic displacement parameters. Hydrogen atoms were refined isotropically at calculated positions using a riding model with their isotropic displacement parameters constrained to be equal to 1.2 times the equivalent isotropic displacement parameters. The N(SCF<sub>3</sub>)(CF<sub>3</sub>)-group is disordered over 2 positions. Several restraints (SAME, SIMU, DELU) were applied to refine this part of the molecule and to avoid the collapse of the structure during the least-squares refinement by the large anisotropic displacement parameters.

CCDC-2211357 (**3m**) contains the supplementary crystallographic data for this paper. These data can be obtained free of charge from the Cambridge Crystallographic Data Centre via <https://www.ccdc.cam.ac.uk/structures/>.

**Selected data for 3m :** C<sub>15</sub>H<sub>11</sub>F<sub>6</sub>NOS,  $M = 367.31$ , triclinic, space group  $P \bar{1}$ ,  $a = 6.173(4) \text{ \AA}$ ,  $b = 7.530(4) \text{ \AA}$ ,  $c = 17.450(10) \text{ \AA}$ ,  $\alpha = 99.942(15)^\circ$ ,  $\beta = 93.614(16)^\circ$ ,  $\gamma = 95.649(16)^\circ$   $V = 792.4(8) \text{ \AA}^3$ ,  $Z = 2$ , crystal size  $0.25 \times 0.06 \times 0.02 \text{ mm}^3$ , 21071 reflections collected (3248 independent,  $R_{int} = 0.1684$ ), 308 parameters, 365 restraints,  $R1 [I > 2\sigma(I)] = 0.0713$ ,  $wR2 [\text{all data}] = 0.2145$ , largest diff. peak and hole:  $0.247$  and  $-0.249 \text{ e\AA}^{-3}$ .

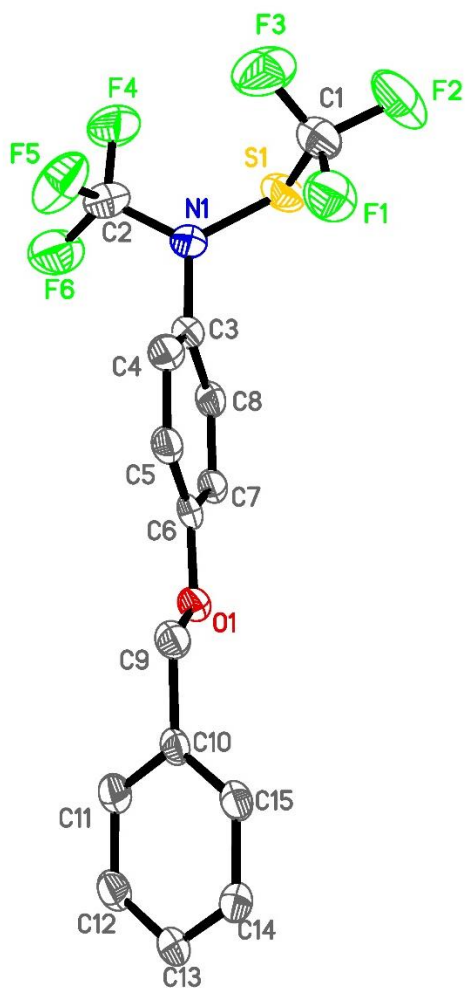

Molecular structure of **3m**. Thermal ellipsoids represent 50 % probability. H and disordered atoms are omitted for clarity. Selected bond lengths [ $\text{\AA}$ ] and angles [ $^\circ$ ]: N1-C3 1.446(6), N1-C2 1.405(7), N1-S1 1.662(5), S1-C1 1.782(3), C1-F3 1.309(7), C1-F2 1.314(8), C1-F1 1.322(7), C2-F4 1.299(6), C2-F5 1.303(7), C2-F6 1.319(7), C3-N1-C2 117.5(4), C3-N1-S1 120.5(3), C2-N1-S1 121.9(4), N1-S1-C1 102.0(3), C4-C3-N1 121.3(4), C8-C3-N1 119.2(4), F3-C1-F2 106.4(6), F3-C1-F1 106.0(6), F2-C1-F1 106.4(6), F3-C1-S1 114.2(5), F2-C1-S1 109.4(5), F1-C1-S1 113.9(5), F4-C2-F5 106.7(5), F4-C2-F6 108.3(6), F5-C2-F6 104.4(6), F4-C2-N1 113.4(6), F5-C2-N1 112.5(5), F6-C2-N1 111.0(5).

## reference

1. Fu, Z.; Yuan, W.; Chen, N.; Yang, Z.; Xu, J., Na<sub>2</sub>S<sub>2</sub>O<sub>8</sub>-mediated efficient synthesis of isothiocyanates from primary amines in water. *Green Chemistry* **2018**, *20* (19), 4484-4491.
2. Scattolin, T.; Bouayad-Gervais, S.; Schoenebeck, F., Straightforward access to N-trifluoromethyl amides, carbamates, thiocarbamates and ureas. *Nature* **2019**, *573* (7772), 102-107.
3. Wang, L.-C.; Chen, B.; Wu, X.-F., Cobalt-Catalyzed Direct Aminocarbonylation of Ethers: Efficient Access to  $\alpha$ -Amide Substituted Ether Derivatives. *Angewandte Chemie International Edition* **2022**, *61* (23), e202203797.
4. Janczewski, Ł.; Gajda, A.; Gajda, T., Direct, Microwave-Assisted Synthesis of Isothiocyanates. *European Journal of Organic Chemistry* **2019**, *2019* (14), 2528-2532.
5. Kirchberg, S.; Fröhlich, R.; Studer, A., Stereoselective Palladium-Catalyzed Carboaminoxylations of Indoles with Arylboronic Acids and TEMPO. *Angewandte Chemie International Edition* **2009**, *48* (23), 4235-4238.
6. Scattolin, T.; Klein, A.; Schoenebeck, F., Synthesis of Isothiocyanates and Unsymmetrical Thioureas with the Bench-Stable Solid Reagent (Me<sub>4</sub>N)SCF<sub>3</sub>. *Organic Letters* **2017**, *19* (7), 1831-1833.
7. Zhang, Z.; Gevorgyan, V., Co-Catalyzed Transannulation of Pyridotriazoles with Isothiocyanates and Xanthate Esters. *Organic Letters* **2020**, *22* (21), 8500-8504.
8. Knaggs, S.; Malkin, H.; Osborn, H. M. I.; Williams, N. A. O.; Yaqoob, P., New prodrugs derived from 6-aminodopamine and 4-aminophenol as candidates for melanocyte-directed enzyme prodrug therapy (MDEPT). *Organic & Biomolecular Chemistry* **2005**, *3* (21), 4002-4010.
9. Bao, J.; Liu, H.; Zhi, Y.; Yang, W.; Zhang, J.; Lu, T.; Wang, Y.; Lu, S., Discovery of benzo[d]oxazole derivatives as the potent type-I FLT3-ITD inhibitors. *Bioorganic Chemistry* **2020**, *94*, 103248.
10. Álvarez-Calero, J. M.; Jorge, Z. D.; Massanet, G. M., TiCl<sub>4</sub>/Et<sub>3</sub>N-Mediated Condensation of Acetate and Formate Esters: Direct Access to  $\beta$ -Alkoxy- and  $\beta$ -Aryloxyacrylates. *Organic Letters* **2016**, *18* (24), 6344-6347.
11. SAINT, Program for data reduction, Bruker-AXS.
12. SADABS, Program for data correction, Bruker-AXS.
13. Sheldrick, G., SHELXT - Integrated space-group and crystal-structure determination. *Acta Crystallographica Section A* **2015**, *71* (1), 3-8.
14. Sheldrick, G., Crystal structure refinement with SHELXL. *Acta Crystallographica Section C* **2015**, *71* (1), 3-8.
